# Supplementary material
Source: publisher figshare collection journal article supplement (https://acs.figshare.com/ndownloader/files/5671965)
Supplement: Supplementary file 1 [file 5671965]

 
data_final
 
_audit_creation_method            'SHELXL-2014/7'
_shelx_SHELXL_version_number      '2014/7'
_chemical_name_systematic         ?
_chemical_name_common             ?
_chemical_melting_point           ?
_chemical_formula_moiety          'C40 H64 N2 Si2'
_chemical_formula_sum
 'C40 H64 N2 Si2' 
_chemical_formula_weight          629.11

loop_
 _atom_type_symbol
 _atom_type_description
 _atom_type_scat_dispersion_real
 _atom_type_scat_dispersion_imag
 _atom_type_scat_source
 'C'  'C'   0.0033   0.0016
 'International Tables Vol C Tables 4.2.6.8 and 6.1.1.4'
 'H'  'H'   0.0000   0.0000
 'International Tables Vol C Tables 4.2.6.8 and 6.1.1.4'
 'N'  'N'   0.0061   0.0033
 'International Tables Vol C Tables 4.2.6.8 and 6.1.1.4'
 'Si'  'Si'   0.0817   0.0704
 'International Tables Vol C Tables 4.2.6.8 and 6.1.1.4'
 
_space_group_crystal_system       triclinic
_space_group_IT_number            2
_space_group_name_H-M_alt         'P -1'
_space_group_name_Hall            '-P 1'
 
_shelx_space_group_comment
;
The symmetry employed for this shelxl refinement is uniquely defined
by the following loop, which should always be used as a source of
symmetry information in preference to the above space-group names.
They are only intended as comments.
;
 
loop_
 _space_group_symop_operation_xyz
 'x, y, z'
 '-x, -y, -z'
 
_cell_length_a                    9.229(2)
_cell_length_b                    10.253(3)
_cell_length_c                    11.671(3)
_cell_angle_alpha                 89.69(2)
_cell_angle_beta                  77.64(2)
_cell_angle_gamma                 64.10(3)
_cell_volume                      965.5(5)
_cell_formula_units_Z             1
_cell_measurement_temperature     100(2)
_cell_measurement_reflns_used     4023
_cell_measurement_theta_min       2.2195
_cell_measurement_theta_max       25.3385
 
_exptl_crystal_description        'Block'
_exptl_crystal_colour             'purple'
_exptl_crystal_density_meas       ?
_exptl_crystal_density_method     ?
_exptl_crystal_density_diffrn     1.082          
_exptl_crystal_F_000              346
_exptl_transmission_factor_min    ?
_exptl_transmission_factor_max    ?
_exptl_crystal_size_max           0.156
_exptl_crystal_size_mid           0.107
_exptl_crystal_size_min           0.074
_exptl_absorpt_coefficient_mu     0.120
_shelx_estimated_absorpt_T_min    0.982
_shelx_estimated_absorpt_T_max    0.991
_exptl_absorpt_correction_type    multi-scan
_exptl_absorpt_correction_T_min   0.6957
_exptl_absorpt_correction_T_max   0.7452
_exptl_absorpt_process_details    'SADABS-2014/5'
_exptl_absorpt_special_details    ?
_diffrn_ambient_temperature       100(2)
_diffrn_radiation_wavelength      0.71073
_diffrn_radiation_type            MoK\a
_diffrn_source                    'INCOATEC Microsource'
_diffrn_measurement_device_type   'Bruker Smart APEX II Quazar'
_diffrn_measurement_method        'omega scans'
_diffrn_detector_area_resol_mean  ?
_diffrn_reflns_number             20521
_diffrn_reflns_av_unetI/netI      0.0366
_diffrn_reflns_av_R_equivalents   0.0499
_diffrn_reflns_limit_h_min        -11
_diffrn_reflns_limit_h_max        11
_diffrn_reflns_limit_k_min        -12
_diffrn_reflns_limit_k_max        12
_diffrn_reflns_limit_l_min        -14
_diffrn_reflns_limit_l_max        14
_diffrn_reflns_theta_min          2.219
_diffrn_reflns_theta_max          25.358
_diffrn_reflns_theta_full         25.242
_diffrn_measured_fraction_theta_max   0.999
_diffrn_measured_fraction_theta_full  1.000
_diffrn_reflns_Laue_measured_fraction_max    0.999
_diffrn_reflns_Laue_measured_fraction_full   1.000
_diffrn_reflns_point_group_measured_fraction_max   0.999
_diffrn_reflns_point_group_measured_fraction_full  1.000
_reflns_number_total              3534
_reflns_number_gt                 2831
_reflns_threshold_expression      'I > 2\s(I)'
_reflns_Friedel_coverage          0.000
_reflns_Friedel_fraction_max      .
_reflns_Friedel_fraction_full     .
 
_reflns_special_details
;
 Reflections were merged by SHELXL according to the crystal
 class for the calculation of statistics and refinement.
 
 _reflns_Friedel_fraction is defined as the number of unique
 Friedel pairs measured divided by the number that would be
 possible theoretically, ignoring centric projections and
 systematic absences.
;
 
_computing_data_collection        'APEX2 v2012.2'
_computing_cell_refinement        'SAINT V8.30C'
_computing_data_reduction         'SAINT V8.30C'
_computing_structure_solution     'SHELXT (G.M.Sheldrick,Acta Cryst.(2015)A71,3-8)'
_computing_structure_refinement 'SHELXL-2014/7 (Sheldrick, 2014)'
_computing_molecular_graphics     'XP Version 5.1'
_computing_publication_material   'XP Version 5.1'
_refine_special_details           ?
_refine_ls_structure_factor_coef  Fsqd
_refine_ls_matrix_type            full
_refine_ls_weighting_scheme       calc
_refine_ls_weighting_details
'w=1/[\s^2^(Fo^2^)+(0.0220P)^2^+0.6513P] where P=(Fo^2^+2Fc^2^)/3'
_atom_sites_solution_primary      ?
_atom_sites_solution_secondary    ?
_atom_sites_solution_hydrogens    mixed
_refine_ls_hydrogen_treatment     mixed
_refine_ls_extinction_method      none
_refine_ls_extinction_coef        .
_refine_ls_number_reflns          3534
_refine_ls_number_parameters      211
_refine_ls_number_restraints      0
_refine_ls_R_factor_all           0.0557
_refine_ls_R_factor_gt            0.0387
_refine_ls_wR_factor_ref          0.0848
_refine_ls_wR_factor_gt           0.0775
_refine_ls_goodness_of_fit_ref    1.030
_refine_ls_restrained_S_all       1.030
_refine_ls_shift/su_max           0.000
_refine_ls_shift/su_mean          0.000
 
loop_
 _atom_site_label
 _atom_site_type_symbol
 _atom_site_fract_x
 _atom_site_fract_y
 _atom_site_fract_z
 _atom_site_U_iso_or_equiv
 _atom_site_adp_type
 _atom_site_occupancy
 _atom_site_site_symmetry_order  
 _atom_site_calc_flag
 _atom_site_refinement_flags_posn
 _atom_site_refinement_flags_adp
 _atom_site_refinement_flags_occupancy
 _atom_site_disorder_assembly
 _atom_site_disorder_group
Si1 Si 0.55582(6) 0.87541(5) 0.47202(4) 0.01648(13) Uani 1 1 d . . . . .
H1 H 0.733(2) 0.810(2) 0.4526(16) 0.029(5) Uiso 1 1 d . . . . .
N1 N 0.61585(16) 0.72688(14) 0.24886(12) 0.0125(3) Uani 1 1 d . . . . .
C1 C 0.5146(2) 0.83999(18) 0.33293(14) 0.0140(4) Uani 1 1 d . . . . .
C2 C 0.3471(2) 0.91705(18) 0.30003(15) 0.0161(4) Uani 1 1 d . . . . .
C3 C 0.3526(2) 0.80119(19) 0.21329(15) 0.0180(4) Uani 1 1 d . . . . .
H3A H 0.2961 0.7459 0.2554 0.022 Uiso 1 1 calc R U . . .
H3B H 0.2958 0.8485 0.1508 0.022 Uiso 1 1 calc R U . . .
C4 C 0.5347(2) 0.69869(18) 0.15911(14) 0.0156(4) Uani 1 1 d . . . . .
C5 C 0.3380(2) 1.05414(19) 0.24152(16) 0.0221(4) Uani 1 1 d . . . . .
H5A H 0.2347 1.1008 0.2149 0.033 Uiso 1 1 calc R U . . .
H5B H 0.4326 1.0268 0.1737 0.033 Uiso 1 1 calc R U . . .
H5C H 0.3409 1.1222 0.2986 0.033 Uiso 1 1 calc R U . . .
C6 C 0.1974(2) 0.9604(2) 0.40496(16) 0.0218(4) Uani 1 1 d . . . . .
H6A H 0.0953 1.0010 0.3767 0.033 Uiso 1 1 calc R U . . .
H6B H 0.1952 1.0336 0.4598 0.033 Uiso 1 1 calc R U . . .
H6C H 0.2061 0.8742 0.4455 0.033 Uiso 1 1 calc R U . . .
C7 C 0.5976(2) 0.7341(2) 0.03635(15) 0.0231(4) Uani 1 1 d . . . . .
H7A H 0.5449 0.7109 -0.0197 0.035 Uiso 1 1 calc R U . . .
H7B H 0.7181 0.6760 0.0113 0.035 Uiso 1 1 calc R U . . .
H7C H 0.5701 0.8380 0.0389 0.035 Uiso 1 1 calc R U . . .
C8 C 0.5644(2) 0.54008(19) 0.14922(16) 0.0219(4) Uani 1 1 d . . . . .
H8A H 0.5041 0.5271 0.0941 0.033 Uiso 1 1 calc R U . . .
H8B H 0.5250 0.5148 0.2269 0.033 Uiso 1 1 calc R U . . .
H8C H 0.6832 0.4765 0.1203 0.033 Uiso 1 1 calc R U . . .
C9 C 0.7905(2) 0.64350(17) 0.24441(14) 0.0134(4) Uani 1 1 d . . . . .
C10 C 0.9029(2) 0.69399(18) 0.18339(14) 0.0159(4) Uani 1 1 d . . . . .
C11 C 1.0705(2) 0.61134(19) 0.17914(15) 0.0196(4) Uani 1 1 d . . . . .
H11 H 1.1481 0.6423 0.1370 0.023 Uiso 1 1 calc R U . . .
C12 C 1.1267(2) 0.4852(2) 0.23481(16) 0.0218(4) Uani 1 1 d . . . . .
H12 H 1.2419 0.4293 0.2294 0.026 Uiso 1 1 calc R U . . .
C13 C 1.0144(2) 0.44097(19) 0.29829(15) 0.0196(4) Uani 1 1 d . . . . .
H13 H 1.0535 0.3558 0.3382 0.024 Uiso 1 1 calc R U . . .
C14 C 0.8449(2) 0.51852(18) 0.30514(14) 0.0159(4) Uani 1 1 d . . . . .
C15 C 0.7295(2) 0.46628(19) 0.38239(15) 0.0184(4) Uani 1 1 d . . . . .
H15 H 0.6131 0.5341 0.3799 0.022 Uiso 1 1 calc R U . . .
C16 C 0.7438(2) 0.4687(2) 0.51097(16) 0.0252(4) Uani 1 1 d . . . . .
H16A H 0.6652 0.4385 0.5595 0.038 Uiso 1 1 calc R U . . .
H16B H 0.7185 0.5676 0.5400 0.038 Uiso 1 1 calc R U . . .
H16C H 0.8568 0.4015 0.5155 0.038 Uiso 1 1 calc R U . . .
C17 C 0.7651(2) 0.31189(19) 0.33817(17) 0.0264(4) Uani 1 1 d . . . . .
H17A H 0.6797 0.2870 0.3833 0.040 Uiso 1 1 calc R U . . .
H17B H 0.8740 0.2420 0.3486 0.040 Uiso 1 1 calc R U . . .
H17C H 0.7642 0.3082 0.2544 0.040 Uiso 1 1 calc R U . . .
C18 C 0.8480(2) 0.83868(19) 0.13029(15) 0.0197(4) Uani 1 1 d . . . . .
H18 H 0.7279 0.8761 0.1312 0.024 Uiso 1 1 calc R U . . .
C19 C 0.8663(2) 0.9509(2) 0.20470(17) 0.0268(4) Uani 1 1 d . . . . .
H19A H 0.8017 0.9628 0.2857 0.040 Uiso 1 1 calc R U . . .
H19B H 0.8255 1.0445 0.1711 0.040 Uiso 1 1 calc R U . . .
H19C H 0.9833 0.9170 0.2048 0.040 Uiso 1 1 calc R U . . .
C20 C 0.9430(2) 0.8226(2) 0.00168(16) 0.0275(5) Uani 1 1 d . . . . .
H20A H 0.9374 0.7454 -0.0436 0.041 Uiso 1 1 calc R U . . .
H20B H 1.0591 0.7974 -0.0008 0.041 Uiso 1 1 calc R U . . .
H20C H 0.8931 0.9149 -0.0326 0.041 Uiso 1 1 calc R U . . .
 
loop_
 _atom_site_aniso_label
 _atom_site_aniso_U_11
 _atom_site_aniso_U_22
 _atom_site_aniso_U_33
 _atom_site_aniso_U_23
 _atom_site_aniso_U_13
 _atom_site_aniso_U_12
Si1 0.0175(3) 0.0152(3) 0.0154(3) -0.00198(19) -0.00526(19) -0.0054(2)
N1 0.0111(7) 0.0139(7) 0.0115(7) -0.0016(6) -0.0029(6) -0.0046(6)
C1 0.0135(8) 0.0126(8) 0.0151(9) 0.0018(7) -0.0017(7) -0.0060(7)
C2 0.0133(9) 0.0172(9) 0.0170(9) 0.0009(7) -0.0048(7) -0.0056(7)
C3 0.0157(9) 0.0227(10) 0.0179(9) 0.0009(7) -0.0059(7) -0.0096(8)
C4 0.0147(9) 0.0195(9) 0.0132(9) -0.0008(7) -0.0042(7) -0.0078(8)
C5 0.0217(10) 0.0187(10) 0.0230(10) 0.0023(8) -0.0083(8) -0.0050(8)
C6 0.0139(9) 0.0253(10) 0.0231(10) -0.0035(8) -0.0025(7) -0.0067(8)
C7 0.0240(10) 0.0319(11) 0.0160(9) -0.0002(8) -0.0056(8) -0.0142(9)
C8 0.0232(10) 0.0222(10) 0.0217(10) -0.0034(8) -0.0078(8) -0.0103(8)
C9 0.0128(8) 0.0143(9) 0.0114(8) -0.0050(7) -0.0015(7) -0.0051(7)
C10 0.0170(9) 0.0185(9) 0.0125(8) -0.0025(7) -0.0033(7) -0.0083(8)
C11 0.0159(9) 0.0259(10) 0.0172(9) -0.0038(8) 0.0001(7) -0.0112(8)
C12 0.0127(9) 0.0254(10) 0.0211(10) -0.0048(8) -0.0023(7) -0.0034(8)
C13 0.0195(9) 0.0162(9) 0.0182(9) -0.0002(7) -0.0056(7) -0.0030(8)
C14 0.0176(9) 0.0143(9) 0.0135(9) -0.0043(7) -0.0033(7) -0.0053(7)
C15 0.0184(9) 0.0167(9) 0.0187(9) 0.0035(7) -0.0031(7) -0.0072(8)
C16 0.0274(11) 0.0264(11) 0.0189(10) 0.0051(8) -0.0039(8) -0.0102(9)
C17 0.0292(11) 0.0187(10) 0.0308(11) 0.0044(8) -0.0071(9) -0.0101(9)
C18 0.0180(9) 0.0210(10) 0.0221(10) 0.0025(8) -0.0035(7) -0.0111(8)
C19 0.0285(11) 0.0232(10) 0.0314(11) 0.0010(8) -0.0028(9) -0.0159(9)
C20 0.0328(11) 0.0317(11) 0.0229(10) 0.0083(9) -0.0058(9) -0.0192(10)
 
_geom_special_details
;
 All esds (except the esd in the dihedral angle between two l.s. planes)
 are estimated using the full covariance matrix.  The cell esds are taken
 into account individually in the estimation of esds in distances, angles
 and torsion angles; correlations between esds in cell parameters are only
 used when they are defined by crystal symmetry.  An approximate (isotropic)
 treatment of cell esds is used for estimating esds involving l.s. planes.
;
 
loop_
 _geom_bond_atom_site_label_1
 _geom_bond_atom_site_label_2
 _geom_bond_distance
 _geom_bond_site_symmetry_2
 _geom_bond_publ_flag
Si1 C1 1.8173(18) . ?
Si1 Si1 2.3336(13) 2_676 ?
Si1 H1 1.437(18) . ?
N1 C1 1.362(2) . ?
N1 C9 1.447(2) . ?
N1 C4 1.506(2) . ?
C1 C2 1.532(2) . ?
C2 C6 1.533(2) . ?
C2 C5 1.536(2) . ?
C2 C3 1.541(2) . ?
C3 C4 1.529(2) . ?
C3 H3A 0.9900 . ?
C3 H3B 0.9900 . ?
C4 C8 1.527(2) . ?
C4 C7 1.531(2) . ?
C5 H5A 0.9800 . ?
C5 H5B 0.9800 . ?
C5 H5C 0.9800 . ?
C6 H6A 0.9800 . ?
C6 H6B 0.9800 . ?
C6 H6C 0.9800 . ?
C7 H7A 0.9800 . ?
C7 H7B 0.9800 . ?
C7 H7C 0.9800 . ?
C8 H8A 0.9800 . ?
C8 H8B 0.9800 . ?
C8 H8C 0.9800 . ?
C9 C14 1.406(2) . ?
C9 C10 1.414(2) . ?
C10 C11 1.391(2) . ?
C10 C18 1.520(2) . ?
C11 C12 1.383(3) . ?
C11 H11 0.9500 . ?
C12 C13 1.381(3) . ?
C12 H12 0.9500 . ?
C13 C14 1.395(2) . ?
C13 H13 0.9500 . ?
C14 C15 1.521(2) . ?
C15 C16 1.535(2) . ?
C15 C17 1.537(2) . ?
C15 H15 1.0000 . ?
C16 H16A 0.9800 . ?
C16 H16B 0.9800 . ?
C16 H16C 0.9800 . ?
C17 H17A 0.9800 . ?
C17 H17B 0.9800 . ?
C17 H17C 0.9800 . ?
C18 C19 1.533(2) . ?
C18 C20 1.537(2) . ?
C18 H18 1.0000 . ?
C19 H19A 0.9800 . ?
C19 H19B 0.9800 . ?
C19 H19C 0.9800 . ?
C20 H20A 0.9800 . ?
C20 H20B 0.9800 . ?
C20 H20C 0.9800 . ?
 
loop_
 _geom_angle_atom_site_label_1
 _geom_angle_atom_site_label_2
 _geom_angle_atom_site_label_3
 _geom_angle
 _geom_angle_site_symmetry_1
 _geom_angle_site_symmetry_3
 _geom_angle_publ_flag
C1 Si1 Si1 111.81(6) . 2_676 ?
C1 Si1 H1 105.6(7) . . ?
Si1 Si1 H1 110.0(7) 2_676 . ?
C1 N1 C9 121.82(13) . . ?
C1 N1 C4 115.44(13) . . ?
C9 N1 C4 122.70(13) . . ?
N1 C1 C2 107.64(14) . . ?
N1 C1 Si1 126.47(12) . . ?
C2 C1 Si1 125.10(12) . . ?
C1 C2 C6 113.92(14) . . ?
C1 C2 C5 108.60(14) . . ?
C6 C2 C5 109.15(14) . . ?
C1 C2 C3 102.72(13) . . ?
C6 C2 C3 110.04(14) . . ?
C5 C2 C3 112.35(14) . . ?
C4 C3 C2 107.74(13) . . ?
C4 C3 H3A 110.2 . . ?
C2 C3 H3A 110.2 . . ?
C4 C3 H3B 110.2 . . ?
C2 C3 H3B 110.2 . . ?
H3A C3 H3B 108.5 . . ?
N1 C4 C8 111.67(14) . . ?
N1 C4 C3 100.73(13) . . ?
C8 C4 C3 111.37(14) . . ?
N1 C4 C7 112.14(13) . . ?
C8 C4 C7 107.95(14) . . ?
C3 C4 C7 112.95(14) . . ?
C2 C5 H5A 109.5 . . ?
C2 C5 H5B 109.5 . . ?
H5A C5 H5B 109.5 . . ?
C2 C5 H5C 109.5 . . ?
H5A C5 H5C 109.5 . . ?
H5B C5 H5C 109.5 . . ?
C2 C6 H6A 109.5 . . ?
C2 C6 H6B 109.5 . . ?
H6A C6 H6B 109.5 . . ?
C2 C6 H6C 109.5 . . ?
H6A C6 H6C 109.5 . . ?
H6B C6 H6C 109.5 . . ?
C4 C7 H7A 109.5 . . ?
C4 C7 H7B 109.5 . . ?
H7A C7 H7B 109.5 . . ?
C4 C7 H7C 109.5 . . ?
H7A C7 H7C 109.5 . . ?
H7B C7 H7C 109.5 . . ?
C4 C8 H8A 109.5 . . ?
C4 C8 H8B 109.5 . . ?
H8A C8 H8B 109.5 . . ?
C4 C8 H8C 109.5 . . ?
H8A C8 H8C 109.5 . . ?
H8B C8 H8C 109.5 . . ?
C14 C9 C10 121.11(15) . . ?
C14 C9 N1 119.90(14) . . ?
C10 C9 N1 118.92(15) . . ?
C11 C10 C9 117.98(16) . . ?
C11 C10 C18 118.76(15) . . ?
C9 C10 C18 123.11(15) . . ?
C12 C11 C10 121.58(16) . . ?
C12 C11 H11 119.2 . . ?
C10 C11 H11 119.2 . . ?
C13 C12 C11 119.61(16) . . ?
C13 C12 H12 120.2 . . ?
C11 C12 H12 120.2 . . ?
C12 C13 C14 121.53(17) . . ?
C12 C13 H13 119.2 . . ?
C14 C13 H13 119.2 . . ?
C13 C14 C9 118.08(16) . . ?
C13 C14 C15 117.85(15) . . ?
C9 C14 C15 124.02(15) . . ?
C14 C15 C16 110.98(14) . . ?
C14 C15 C17 111.77(15) . . ?
C16 C15 C17 109.29(15) . . ?
C14 C15 H15 108.2 . . ?
C16 C15 H15 108.2 . . ?
C17 C15 H15 108.2 . . ?
C15 C16 H16A 109.5 . . ?
C15 C16 H16B 109.5 . . ?
H16A C16 H16B 109.5 . . ?
C15 C16 H16C 109.5 . . ?
H16A C16 H16C 109.5 . . ?
H16B C16 H16C 109.5 . . ?
C15 C17 H17A 109.5 . . ?
C15 C17 H17B 109.5 . . ?
H17A C17 H17B 109.5 . . ?
C15 C17 H17C 109.5 . . ?
H17A C17 H17C 109.5 . . ?
H17B C17 H17C 109.5 . . ?
C10 C18 C19 110.73(15) . . ?
C10 C18 C20 112.18(15) . . ?
C19 C18 C20 110.30(15) . . ?
C10 C18 H18 107.8 . . ?
C19 C18 H18 107.8 . . ?
C20 C18 H18 107.8 . . ?
C18 C19 H19A 109.5 . . ?
C18 C19 H19B 109.5 . . ?
H19A C19 H19B 109.5 . . ?
C18 C19 H19C 109.5 . . ?
H19A C19 H19C 109.5 . . ?
H19B C19 H19C 109.5 . . ?
C18 C20 H20A 109.5 . . ?
C18 C20 H20B 109.5 . . ?
H20A C20 H20B 109.5 . . ?
C18 C20 H20C 109.5 . . ?
H20A C20 H20C 109.5 . . ?
H20B C20 H20C 109.5 . . ?
 
loop_
 _geom_torsion_atom_site_label_1
 _geom_torsion_atom_site_label_2
 _geom_torsion_atom_site_label_3
 _geom_torsion_atom_site_label_4
 _geom_torsion
 _geom_torsion_site_symmetry_1
 _geom_torsion_site_symmetry_2
 _geom_torsion_site_symmetry_3
 _geom_torsion_site_symmetry_4
 _geom_torsion_publ_flag
C9 N1 C1 C2 171.39(14) . . . . ?
C4 N1 C1 C2 -6.50(18) . . . . ?
C9 N1 C1 Si1 -18.5(2) . . . . ?
C4 N1 C1 Si1 163.65(12) . . . . ?
Si1 Si1 C1 N1 146.17(13) 2_676 . . . ?
Si1 Si1 C1 C2 -45.32(15) 2_676 . . . ?
N1 C1 C2 C6 137.70(15) . . . . ?
Si1 C1 C2 C6 -32.6(2) . . . . ?
N1 C1 C2 C5 -100.43(16) . . . . ?
Si1 C1 C2 C5 89.24(16) . . . . ?
N1 C1 C2 C3 18.72(17) . . . . ?
Si1 C1 C2 C3 -151.60(12) . . . . ?
C1 C2 C3 C4 -24.33(17) . . . . ?
C6 C2 C3 C4 -145.98(14) . . . . ?
C5 C2 C3 C4 92.18(16) . . . . ?
C1 N1 C4 C8 -127.07(15) . . . . ?
C9 N1 C4 C8 55.06(19) . . . . ?
C1 N1 C4 C3 -8.75(18) . . . . ?
C9 N1 C4 C3 173.37(14) . . . . ?
C1 N1 C4 C7 111.62(16) . . . . ?
C9 N1 C4 C7 -66.3(2) . . . . ?
C2 C3 C4 N1 20.30(16) . . . . ?
C2 C3 C4 C8 138.83(15) . . . . ?
C2 C3 C4 C7 -99.50(16) . . . . ?
C1 N1 C9 C14 90.72(19) . . . . ?
C4 N1 C9 C14 -91.54(19) . . . . ?
C1 N1 C9 C10 -86.14(19) . . . . ?
C4 N1 C9 C10 91.60(18) . . . . ?
C14 C9 C10 C11 3.9(2) . . . . ?
N1 C9 C10 C11 -179.33(14) . . . . ?
C14 C9 C10 C18 -171.66(15) . . . . ?
N1 C9 C10 C18 5.2(2) . . . . ?
C9 C10 C11 C12 -1.5(2) . . . . ?
C18 C10 C11 C12 174.26(16) . . . . ?
C10 C11 C12 C13 -1.3(3) . . . . ?
C11 C12 C13 C14 1.8(3) . . . . ?
C12 C13 C14 C9 0.5(3) . . . . ?
C12 C13 C14 C15 -176.82(16) . . . . ?
C10 C9 C14 C13 -3.4(2) . . . . ?
N1 C9 C14 C13 179.82(14) . . . . ?
C10 C9 C14 C15 173.77(15) . . . . ?
N1 C9 C14 C15 -3.0(2) . . . . ?
C13 C14 C15 C16 59.8(2) . . . . ?
C9 C14 C15 C16 -117.38(18) . . . . ?
C13 C14 C15 C17 -62.5(2) . . . . ?
C9 C14 C15 C17 120.33(18) . . . . ?
C11 C10 C18 C19 -69.8(2) . . . . ?
C9 C10 C18 C19 105.63(18) . . . . ?
C11 C10 C18 C20 53.9(2) . . . . ?
C9 C10 C18 C20 -130.67(17) . . . . ?
 
_refine_diff_density_max    0.317
_refine_diff_density_min   -0.278
_refine_diff_density_rms    0.043

_shelx_res_file
;

    final.res created by SHELXL-2014/7


TITL sad_a.res in P-1
REM Old TITL sad in P-1

REM SHELXT solution in P-1
REM R1 0.121,  Rweak 0.006,  Alpha 0.040,  Orientation as input
REM Formula found by SHELXT:  C20 N Si

CELL  0.71073   9.229  10.253  11.671   89.69   77.64   64.10
ZERR    1.000   0.002   0.003   0.003    0.02    0.02    0.02
LATT  1
SFAC C H N SI
UNIT 40 64 2 2
TEMP -173.000
SIZE 0.074 0.107 0.156
L.S. 10
BOND $H
LIST 4
ACTA
CONF
FMAP 2
PLAN 20
REM #####
REM #####
WGHT    0.022000    0.651300
FVAR       0.98673
SI1   4    0.555816    0.875408    0.472024    11.00000    0.01746    0.01520 =
         0.01541   -0.00198   -0.00526   -0.00538
H1    2    0.733156    0.809863    0.452632    11.00000    0.02927
N1    3    0.615848    0.726880    0.248857    11.00000    0.01112    0.01385 =
         0.01154   -0.00157   -0.00292   -0.00464
C1    1    0.514634    0.839990    0.332932    11.00000    0.01353    0.01262 =
         0.01513    0.00184   -0.00171   -0.00602
C2    1    0.347055    0.917053    0.300032    11.00000    0.01326    0.01725 =
         0.01697    0.00090   -0.00483   -0.00558
C3    1    0.352632    0.801193    0.213295    11.00000    0.01569    0.02267 =
         0.01791    0.00094   -0.00592   -0.00958
AFIX  23
H3A   2    0.296109    0.745907    0.255356    11.00000   -1.20000
H3B   2    0.295829    0.848499    0.150785    11.00000   -1.20000
AFIX   0
C4    1    0.534741    0.698687    0.159107    11.00000    0.01473    0.01947 =
         0.01318   -0.00079   -0.00419   -0.00783
C5    1    0.337998    1.054144    0.241515    11.00000    0.02173    0.01868 =
         0.02303    0.00234   -0.00833   -0.00505
AFIX 137
H5A   2    0.234700    1.100801    0.214945    11.00000   -1.50000
H5B   2    0.432635    1.026836    0.173706    11.00000   -1.50000
H5C   2    0.340881    1.122239    0.298570    11.00000   -1.50000
AFIX   0
C6    1    0.197420    0.960402    0.404961    11.00000    0.01385    0.02534 =
         0.02308   -0.00347   -0.00245   -0.00672
AFIX 137
H6A   2    0.095258    1.001036    0.376654    11.00000   -1.50000
H6B   2    0.195223    1.033640    0.459810    11.00000   -1.50000
H6C   2    0.206122    0.874244    0.445496    11.00000   -1.50000
AFIX   0
C7    1    0.597610    0.734093    0.036352    11.00000    0.02396    0.03195 =
         0.01596   -0.00020   -0.00562   -0.01420
AFIX 137
H7A   2    0.544862    0.710948   -0.019712    11.00000   -1.50000
H7B   2    0.718074    0.676043    0.011303    11.00000   -1.50000
H7C   2    0.570140    0.837953    0.038882    11.00000   -1.50000
AFIX   0
C8    1    0.564443    0.540079    0.149215    11.00000    0.02318    0.02219 =
         0.02175   -0.00337   -0.00775   -0.01025
AFIX 137
H8A   2    0.504142    0.527126    0.094070    11.00000   -1.50000
H8B   2    0.525004    0.514805    0.226908    11.00000   -1.50000
H8C   2    0.683242    0.476522    0.120320    11.00000   -1.50000
AFIX   0
C9    1    0.790512    0.643501    0.244408    11.00000    0.01280    0.01427 =
         0.01137   -0.00503   -0.00151   -0.00505
C10   1    0.902870    0.693995    0.183395    11.00000    0.01696    0.01846 =
         0.01253   -0.00254   -0.00333   -0.00827
C11   1    1.070467    0.611344    0.179143    11.00000    0.01589    0.02585 =
         0.01722   -0.00379    0.00008   -0.01123
AFIX  43
H11   2    1.148137    0.642295    0.137006    11.00000   -1.20000
AFIX   0
C12   1    1.126724    0.485163    0.234809    11.00000    0.01266    0.02541 =
         0.02110   -0.00480   -0.00234   -0.00344
AFIX  43
H12   2    1.241949    0.429251    0.229387    11.00000   -1.20000
AFIX   0
C13   1    1.014422    0.440972    0.298289    11.00000    0.01949    0.01624 =
         0.01815   -0.00017   -0.00557   -0.00297
AFIX  43
H13   2    1.053484    0.355792    0.338231    11.00000   -1.20000
AFIX   0
C14   1    0.844873    0.518521    0.305142    11.00000    0.01765    0.01432 =
         0.01350   -0.00435   -0.00332   -0.00533
C15   1    0.729529    0.466282    0.382395    11.00000    0.01843    0.01672 =
         0.01873    0.00347   -0.00312   -0.00723
AFIX  13
H15   2    0.613070    0.534125    0.379891    11.00000   -1.20000
AFIX   0
C16   1    0.743810    0.468672    0.510971    11.00000    0.02735    0.02638 =
         0.01892    0.00514   -0.00389   -0.01020
AFIX 137
H16A  2    0.665223    0.438521    0.559489    11.00000   -1.50000
H16B  2    0.718509    0.567555    0.540023    11.00000   -1.50000
H16C  2    0.856811    0.401465    0.515462    11.00000   -1.50000
AFIX   0
C17   1    0.765079    0.311887    0.338172    11.00000    0.02924    0.01868 =
         0.03081    0.00438   -0.00714   -0.01015
AFIX 137
H17A  2    0.679684    0.286996    0.383323    11.00000   -1.50000
H17B  2    0.873990    0.242009    0.348559    11.00000   -1.50000
H17C  2    0.764231    0.308216    0.254441    11.00000   -1.50000
AFIX   0
C18   1    0.848007    0.838681    0.130287    11.00000    0.01796    0.02104 =
         0.02206    0.00251   -0.00349   -0.01109
AFIX  13
H18   2    0.727860    0.876093    0.131232    11.00000   -1.20000
AFIX   0
C19   1    0.866291    0.950883    0.204702    11.00000    0.02847    0.02321 =
         0.03143    0.00103   -0.00277   -0.01587
AFIX 137
H19A  2    0.801703    0.962827    0.285710    11.00000   -1.50000
H19B  2    0.825529    1.044535    0.171140    11.00000   -1.50000
H19C  2    0.983331    0.917026    0.204834    11.00000   -1.50000
AFIX   0
C20   1    0.943037    0.822649    0.001678    11.00000    0.03278    0.03171 =
         0.02286    0.00831   -0.00582   -0.01920
AFIX 137
H20A  2    0.937432    0.745423   -0.043562    11.00000   -1.50000
H20B  2    1.059124    0.797445   -0.000802    11.00000   -1.50000
H20C  2    0.893145    0.914858   -0.032605    11.00000   -1.50000
REM #####
AFIX   0
HKLF 4

REM  sad_a.res in P-1
REM R1 =  0.0387 for    2831 Fo > 4sig(Fo)  and  0.0557 for all    3534 data
REM    211 parameters refined using      0 restraints

END

WGHT      0.0220      0.6513

REM Highest difference peak  0.317,  deepest hole -0.278,  1-sigma level  0.043
Q1    1   0.5000  1.0000  0.5000  10.50000  0.05    0.32
Q2    1   0.3422  0.8692  0.2582  11.00000  0.05    0.30
Q3    1   0.5480  0.8674  0.3837  11.00000  0.05    0.29
Q4    1   0.4254  0.8741  0.3175  11.00000  0.05    0.26
Q5    1   0.4462  0.7519  0.1844  11.00000  0.05    0.24
Q6    1   0.8827  0.7632  0.1517  11.00000  0.05    0.22
Q7    1   0.5267  0.8069  0.4191  11.00000  0.05    0.22
Q8    1   0.5798  0.6995  0.1942  11.00000  0.05    0.22
Q9    1   0.5467  0.6259  0.1477  11.00000  0.05    0.21
Q10   1   0.2751  0.9327  0.3509  11.00000  0.05    0.21
Q11   1   0.3505  0.9804  0.2810  11.00000  0.05    0.21
Q12   1   0.8190  0.5607  0.2587  11.00000  0.05    0.21
Q13   1   0.9253  0.5057  0.3203  11.00000  0.05    0.21
Q14   1   0.7304  0.3999  0.3607  11.00000  0.05    0.20
Q15   1   0.8720  0.8878  0.1667  11.00000  0.05    0.19
Q16   1   0.5434  0.7937  0.5300  11.00000  0.05    0.19
Q17   1   0.6468  0.7452  0.4792  11.00000  0.05    0.19
Q18   1   0.9776  0.6373  0.1546  11.00000  0.05    0.19
Q19   1   0.7873  0.4946  0.3338  11.00000  0.05    0.19
Q20   1   0.7393  0.4615  0.4373  11.00000  0.05    0.19
;
_shelx_res_checksum   10469

_shelx_hkl_file
;
  -1   0   0  383.16    7.40
  -1   0   0  370.46    9.20
  -1   0   0  390.86    7.30
  -1   0   0  374.06    8.90
  -1   0   0  377.16    8.20
  -1   0   0  368.36    9.20
   1   0   0  371.56    9.40
   1   0   0  364.56    7.30
   1   0   0  380.26    7.40
   1   0   0  371.96    9.20
   1   0   0  374.26    8.10
   1   0   0  375.86    8.70
   1   0   0  381.96    9.30
   1   0   0  387.46    8.90
   1   0   0  378.86    7.30
  -2   0   0    5.00    2.00
  -2   0   0   -0.70    3.10
  -2   0   0    4.60    3.30
  -2   0   0    4.90    2.00
  -2   0   0    1.00    2.60
   2   0   0    5.90    3.60
   2   0   0    6.90    2.20
   2   0   0    3.50    2.10
   2   0   0    6.90    2.20
   2   0   0    3.00    3.00
  -3   0   0  486.95   16.90
  -3   0   0  484.45   11.90
  -3   0   0  483.85   16.50
  -3   0   0  484.45   14.60
   3   0   0  478.05   12.30
   3   0   0  458.05   15.10
   3   0   0  498.75   13.00
   3   0   0  478.15   12.00
   3   0   0  506.25   17.10
  -4   0   0   78.39   10.60
  -4   0   0   84.59    8.40
  -4   0   0   73.19    5.90
  -4   0   0   74.59    9.20
   4   0   0   87.49   10.10
   4   0   0   85.99    6.60
   4   0   0   81.89   10.50
   4   0   0   99.79    9.70
  -5   0   0    1.80    5.80
  -5   0   0    5.80    4.80
  -5   0   0   15.60    6.70
  -5   0   0    2.00    2.80
   5   0   0    4.10    4.90
   5   0   0    6.50    5.40
   5   0   0    2.80    3.10
   5   0   0    9.40    6.10
  -6   0   0   27.00    7.70
  -6   0   0   16.10    7.40
  -6   0   0   17.80    4.20
  -6   0   0   25.60    8.80
   6   0   0   23.90    7.20
   6   0   0   26.00    4.70
   6   0   0   33.10    8.80
   6   0   0   27.70    5.30
   6   0   0   17.70    8.40
  -7   0   0   12.70    7.20
  -7   0   0   14.20    9.40
  -7   0   0   13.10    8.60
   7   0   0    2.60    6.70
   7   0   0    7.90    7.90
   7   0   0   21.50    9.60
  -8   0   0   -1.30   10.00
  -8   0   0   10.20   10.30
   8   0   0   -2.50    9.60
   8   0   0    4.80    8.20
   8   0   0   -4.00    7.60
  -9   0   0   83.69   16.30
   9   0   0   61.49   14.90
   9   0   0   79.49   16.30
   9  -1   0   38.40   12.60
   9  -1   0   31.10   12.20
  -9   1   0   58.29   16.30
   8  -1   0   72.29   15.20
   8  -1   0   54.89   14.50
  -8   1   0   79.29   15.80
   7  -1   0    2.00    6.50
   7  -1   0    6.30    9.40
   7  -1   0    7.80    8.80
  -7   1   0   -1.20    7.00
  -7   1   0    6.60    8.10
   6  -1   0    7.10    7.40
   6  -1   0   -2.90    5.80
   6  -1   0   -2.10    5.50
  -6   1   0   -3.90    7.40
  -6   1   0   -2.30    6.00
   5  -1   0  298.57   17.30
   5  -1   0  224.68   13.50
   5  -1   0  235.08   15.80
   5  -1   0  252.27    8.30
  -5   1   0  249.97   16.40
  -5   1   0  237.08   14.70
   4  -1   0 1358.16   24.60
   4  -1   0 1414.26   24.80
   4  -1   0 1420.36   35.80
   4  -1   0 1369.86   23.00
   4  -1   0 1348.77   31.90
   4  -1   0 1369.06   23.00
   4  -1   0 1366.46   35.90
  -4   1   0 1451.75   36.90
  -4   1   0 1412.86   33.60
   3  -1   0 1661.33   26.50
   3  -1   0 1636.84   26.50
   3  -1   0 1689.83   27.50
   3  -1   0 1675.73   27.40
   3  -1   0 1655.53   33.70
   3  -1   0 1720.63   37.60
   3  -1   0 1677.53   37.10
  -3   1   0 1691.43   35.70
  -3   1   0 1682.63   37.70
  -3   1   0 1664.63   37.90
   2  -1   0   -0.80    0.90
   2  -1   0    1.90    3.50
   2  -1   0   -2.20    2.70
   2  -1   0    0.80    1.00
   2  -1   0    1.40    2.40
  -2   1   0    3.60    2.80
  -2   1   0    3.10    3.60
   1  -1   0   24.70    4.00
   1  -1   0   19.40    1.80
   1  -1   0   12.70    3.30
   1  -1   0   20.40    2.70
  -1   1   0   19.60    3.70
  -1   1   0   21.10    1.90
  -1   1   0   17.30    3.30
  -1   1   0   21.20    2.80
  -1   1   0   18.30    3.60
   0  -1   0  145.29    4.70
   0  -1   0  151.68    4.80
   0  -1   0  126.69    3.80
   0  -1   0  139.49    4.50
   0  -1   0  141.89    4.60
   0  -1   0  148.79    4.00
   0   1   0  154.78    4.70
   0   1   0  141.59    4.00
   0   1   0  144.79    4.70
   0   1   0  144.79    4.80
   0   1   0  145.99    4.60
   0   1   0  140.49    4.20
  -1  -1   0 3030.30   48.20
  -1  -1   0 2969.30   47.70
  -1  -1   0 2949.51   48.30
  -1  -1   0 2931.21   45.30
  -1  -1   0 2995.90   44.80
  -1  -1   0 2974.10   47.70
  -1  -1   0 3033.60   47.20
   1   1   0 3029.40   48.40
   1   1   0 3015.90   47.70
   1   1   0 3040.10   47.70
   1   1   0 3012.20   44.70
   1   1   0 3004.50   47.20
   1   1   0 3023.10   48.00
   1   1   0 3042.40   47.70
   1   1   0 3005.40   45.40
  -2  -1   0  224.88    6.90
  -2  -1   0  216.48    9.90
  -2  -1   0  207.38    7.60
  -2  -1   0  223.78    9.10
  -2  -1   0  223.78    9.60
   2   1   0  214.58    9.10
   2   1   0  197.28    7.50
   2   1   0  215.28    7.50
   2   1   0  206.38    6.50
  -3  -1   0 3124.59   58.29
  -3  -1   0 3110.39   53.69
  -3  -1   0 3151.88   51.89
  -3  -1   0 3139.59   54.79
  -3  -1   0 3110.79   56.99
   3   1   0 3153.68   53.69
   3   1   0 3145.79   56.79
  -4  -1   0  156.38   11.20
  -4  -1   0  159.78    9.40
  -4  -1   0  158.88    9.00
  -4  -1   0  147.29   12.50
  -4  -1   0  162.78   12.50
   4   1   0  168.18   12.00
   4   1   0  158.38    9.50
   4   1   0  153.48   12.00
  -5  -1   0  194.98   13.40
  -5  -1   0  188.18   10.20
  -5  -1   0  224.58   14.60
  -5  -1   0  212.58   11.60
   5   1   0  206.48   10.80
   5   1   0  200.08   13.40
   5   1   0  219.88   15.30
  -6  -1   0  642.74   26.60
  -6  -1   0  625.94   25.00
  -6  -1   0  624.84   21.00
  -6  -1   0  678.73   19.60
   6   1   0  627.04   20.10
   6   1   0  641.54   26.30
   6   1   0  627.64   24.50
  -7  -1   0  126.29   14.80
  -7  -1   0  133.19   15.90
  -7  -1   0  148.89   13.10
   7   1   0  130.99   11.40
   7   1   0  127.79   15.30
   7   1   0  172.38   16.70
   7   1   0  151.28   16.50
  -8  -1   0  133.69   17.90
  -8  -1   0  154.48   19.10
   8   1   0  129.99   15.80
   8   1   0  106.09   16.30
   8   1   0  118.49   16.60
  -9  -1   0   71.59   15.90
  -9  -1   0   61.99   14.30
   9   1   0   83.89   16.10
   9   1   0   49.50   12.90
   9   1   0   58.19   13.00
 -10  -1   0   20.30   11.90
 -10  -1   0    5.90   11.00
  10   1   0   45.80   14.10
  10   1   0   -0.90   10.80
   8  -2   0   -6.30    8.40
   8  -2   0    0.20    9.50
  -8   2   0    1.90   11.20
   7  -2   0  190.78   19.40
   7  -2   0  184.08   19.80
  -7   2   0  243.98   19.40
  -7   2   0  210.38   22.90
   6  -2   0   92.89   11.40
   6  -2   0   57.99   12.10
   6  -2   0   79.59   12.50
  -6   2   0   87.59   14.50
  -6   2   0   87.79   12.80
   5  -2   0  185.18   12.20
   5  -2   0  194.78   15.40
   5  -2   0  172.78   15.80
  -5   2   0  185.18   17.70
  -5   2   0  192.98   14.70
   4  -2   0   10.70    6.00
   4  -2   0    4.00    4.00
   4  -2   0    2.70    5.80
  -4   2   0    4.70    5.60
  -4   2   0    3.10    6.00
   3  -2   0   17.00    7.00
   3  -2   0    9.00    4.50
   3  -2   0   13.50    6.20
  -3   2   0    5.90    5.80
  -3   2   0    4.00    5.80
   2  -2   0  211.38    5.80
   2  -2   0  223.48    8.80
   2  -2   0  217.38   11.00
   2  -2   0  237.78   12.00
  -2   2   0  232.28   11.70
  -2   2   0  198.58   11.40
  -2   2   0  207.38    5.80
   1  -2   0 1125.89   21.30
   1  -2   0 1106.89   24.30
   1  -2   0 1159.28   21.20
   1  -2   0 1151.08   24.60
  -1   2   0 1157.98   25.20
  -1   2   0 1142.79   25.00
  -1   2   0 1124.39   18.80
  -1   2   0 1140.69   18.80
  -1   2   0 1144.39   21.20
  -1   2   0 1140.49   21.40
   0  -2   0  414.76   11.70
   0  -2   0  402.66    9.90
   0  -2   0  408.46   11.40
   0  -2   0  408.56   10.20
   0   2   0  406.86   11.50
   0   2   0  384.56   11.60
   0   2   0  396.76    9.90
   0   2   0  410.06   10.00
   0   2   0  398.96   10.60
  -1  -2   0  194.78    8.10
  -1  -2   0  191.98    7.20
  -1  -2   0  182.08    8.40
  -1  -2   0  190.28    8.30
  -1  -2   0  176.68    7.90
  -1  -2   0  178.68    4.00
   1   2   0  192.08    7.80
   1   2   0  202.58    7.10
   1   2   0  187.68    4.20
   1   2   0  199.58    7.90
  -2  -2   0 1444.86   23.80
  -2  -2   0 1456.95   29.80
  -2  -2   0 1471.55   29.50
  -2  -2   0 1479.05   28.60
  -2  -2   0 1375.46   29.80
  -2  -2   0 1427.96   24.70
   2   2   0 1457.55   29.00
   2   2   0 1458.75   24.90
   2   2   0 1429.56   23.40
  -3  -2   0  584.74   14.50
  -3  -2   0  589.64   18.20
  -3  -2   0  578.34   13.30
  -3  -2   0  613.04   18.20
  -3  -2   0  559.84   18.30
  -3  -2   0  587.64   17.60
   3   2   0  603.64   18.80
   3   2   0  596.04   16.90
   3   2   0  558.34   12.70
   3   2   0  593.64   13.70
  -4  -2   0   86.89    9.70
  -4  -2   0   77.99    9.80
  -4  -2   0   90.99    6.90
  -4  -2   0  101.99    9.60
  -4  -2   0   86.99    8.30
   4   2   0   96.79   10.70
   4   2   0   94.19    9.00
  -5  -2   0  596.24   20.40
  -5  -2   0  585.04   23.00
  -5  -2   0  602.64   17.30
  -5  -2   0  589.34   23.90
   5   2   0  615.94   23.00
   5   2   0  625.74   23.70
   5   2   0  593.14   20.00
  -6  -2   0  890.81   31.00
  -6  -2   0  886.41   28.30
  -6  -2   0  906.31   32.60
  -6  -2   0  864.81   26.00
  -6  -2   0  935.41   24.10
   6   2   0  910.61   31.60
   6   2   0  906.11   30.80
   6   2   0  923.11   26.60
  -7  -2   0  100.29   10.20
  -7  -2   0   95.19   10.70
  -7  -2   0   79.69   12.80
  -7  -2   0   69.09   11.90
   7   2   0   94.99   14.20
   7   2   0   82.89   10.20
   7   2   0   82.39   12.60
  -8  -2   0   11.70    9.00
  -8  -2   0   -0.70    9.20
   8   2   0   12.30    9.90
   8   2   0   11.00    8.60
   8   2   0   11.50    6.50
  -9  -2   0   14.90   11.70
  -9  -2   0    8.40    9.90
   9   2   0    5.60    8.80
   9   2   0   -3.50    7.90
   9   2   0    3.40    9.60
 -10  -2   0    5.60   11.00
 -10  -2   0    2.40   10.70
  10   2   0    5.00    9.20
  10   2   0    8.10    9.90
  10   2   0   -1.90    8.70
   8  -3   0  -16.90    7.90
   8  -3   0    4.90   10.10
  -8   3   0   -0.50   11.50
  -8   3   0   -2.40   13.60
   7  -3   0   12.30    9.50
   7  -3   0   23.40   11.80
  -7   3   0   29.60   10.60
  -7   3   0   44.00   14.00
   6  -3   0  180.18   18.30
   6  -3   0  158.18   18.20
  -6   3   0  169.98   20.00
  -6   3   0  211.48   19.70
   5  -3   0  106.29   10.70
   5  -3   0   71.29   12.40
   5  -3   0   94.69   13.50
  -5   3   0  110.89   15.40
  -5   3   0  120.69   14.10
   4  -3   0  190.58   11.30
   4  -3   0  202.18   14.40
   4  -3   0  193.98   14.80
  -4   3   0  205.08   16.30
  -4   3   0  188.28   14.60
   3  -3   0   33.20    5.40
   3  -3   0   27.90    7.20
   3  -3   0   25.80    7.10
  -3   3   0   51.29    9.00
  -3   3   0   38.50    8.20
   2  -3   0  144.89    8.80
   2  -3   0  149.88   11.70
   2  -3   0  156.78   12.70
   2  -3   0  148.19    6.80
  -2   3   0  149.29    7.10
  -2   3   0  158.58   11.80
  -2   3   0  156.98   13.00
   1  -3   0  240.48    9.30
   1  -3   0  238.28    9.10
   1  -3   0  251.17   12.20
   1  -3   0  242.88   12.40
  -1   3   0  235.18    7.30
  -1   3   0  240.88    7.40
  -1   3   0  240.58   11.80
  -1   3   0  262.17   12.20
   0  -3   0  891.91   21.10
   0  -3   0  874.61   19.00
   0  -3   0  846.92   20.80
   0  -3   0  854.41   21.40
   0   3   0  859.91   21.50
   0   3   0  846.32   19.60
   0   3   0  837.62   18.50
  -1  -3   0  266.67   10.30
  -1  -3   0  234.28   10.40
  -1  -3   0  245.38   10.90
  -1  -3   0  249.78   10.70
  -1  -3   0  252.17    6.90
   1   3   0  257.87    9.90
   1   3   0  224.28    9.40
   1   3   0  248.08    7.10
  -2  -3   0  657.63   17.10
  -2  -3   0  587.24   18.80
  -2  -3   0  608.14   17.70
  -2  -3   0  618.14   17.50
   2   3   0  641.04   17.80
   2   3   0  630.94   14.90
  -3  -3   0   24.00    7.00
  -3  -3   0   -3.10    5.00
  -3  -3   0   10.90    5.90
  -4  -3   0   97.29    7.70
  -4  -3   0   98.49   10.90
  -4  -3   0  115.89   11.20
  -4  -3   0  102.89   10.70
  -4  -3   0  102.19   11.40
   4   3   0   83.89    9.10
   4   3   0  112.69   11.90
   4   3   0  108.79    6.50
  -5  -3   0   61.59   10.70
  -5  -3   0   84.09   10.20
  -5  -3   0   52.79    7.20
  -5  -3   0   64.19    9.60
   5   3   0   61.29    8.30
   5   3   0   68.89    5.80
   5   3   0   75.69   10.80
  -6  -3   0  120.49   13.40
  -6  -3   0  130.49    8.50
  -6  -3   0  143.09   11.60
  -6  -3   0  101.79   13.20
  -6  -3   0  142.29   12.10
   6   3   0  132.09    7.70
   6   3   0  134.19   12.50
   6   3   0  116.79   13.50
  -7  -3   0 1117.79   38.00
  -7  -3   0 1074.59   38.70
  -7  -3   0 1124.79   33.90
  -7  -3   0 1161.28   27.60
   7   3   0 1124.59   38.80
   7   3   0 1163.08   33.50
   7   3   0 1114.69   38.10
  -8  -3   0    4.10    8.50
  -8  -3   0   -4.50    7.90
  -8  -3   0    4.80    7.00
  -8  -3   0   -3.40    6.60
   8   3   0    3.40    8.40
   8   3   0    7.90    7.90
   8   3   0   -0.10    6.70
  -9  -3   0   -7.60   11.60
  -9  -3   0    5.00   10.70
   9   3   0   -1.50   10.30
   9   3   0  -11.10    9.70
 -10  -3   0  -12.90    9.90
 -10  -3   0   18.70   11.20
  10   3   0   11.90    9.90
  10   3   0   -2.00    8.30
  10   3   0    6.00    9.40
   7  -4   0    9.00   10.80
   7  -4   0    6.90   11.50
  -7   4   0   11.90   10.50
  -7   4   0   37.60   12.70
   6  -4   0    1.90   10.30
   6  -4   0    5.60   11.10
  -6   4   0  -10.40    7.10
  -6   4   0   -3.60    8.40
   5  -4   0   -1.70    8.50
   5  -4   0   -8.20    8.80
  -5   4   0   12.70    8.60
  -5   4   0   -3.00    7.60
   4  -4   0    9.10    5.50
   4  -4   0    3.90    8.40
   4  -4   0   22.70    8.90
  -4   4   0    8.50    7.30
  -4   4   0   -7.10    6.80
   3  -4   0   91.89    8.50
   3  -4   0   97.89    4.80
   3  -4   0   91.29   12.20
   3  -4   0  118.49   12.90
  -3   4   0  101.09   12.50
  -3   4   0   89.29   12.00
   2  -4   0  622.14   16.40
   2  -4   0  661.73   17.90
   2  -4   0  607.84   22.30
   2  -4   0  640.04   22.80
  -2   4   0  653.23   23.00
  -2   4   0  617.14   11.50
  -2   4   0  628.84   11.80
  -2   4   0  633.04   23.00
   1  -4   0  138.89    8.80
   1  -4   0  135.19    9.20
   1  -4   0  168.08   14.30
   1  -4   0  132.99   11.80
  -1   4   0  119.79    6.60
  -1   4   0  132.79   10.30
  -1   4   0  109.09   10.70
   0  -4   0   70.69    9.20
   0  -4   0   54.09    7.50
   0  -4   0   58.39    8.60
   0  -4   0   64.79    7.00
   0   4   0   55.19    6.80
   0   4   0   53.89    7.90
   0   4   0   51.19    5.80
  -1  -4   0   25.80    6.20
  -1  -4   0   21.20    6.00
  -1  -4   0   22.00    6.10
  -1  -4   0   28.10    5.60
   1   4   0   28.20    5.30
   1   4   0   19.00    5.30
   1   4   0   28.60    4.10
  -2  -4   0   16.20    2.10
  -2  -4   0   11.10    5.20
  -2  -4   0   11.90    5.40
  -2  -4   0   13.30    5.50
  -2  -4   0   12.90    5.50
   2   4   0   15.70    1.90
   2   4   0   14.10    4.30
   2   4   0    5.80    3.90
  -3  -4   0   -0.60    5.70
  -3  -4   0  -10.10    5.80
  -3  -4   0    1.00    5.50
  -3  -4   0   -1.60    5.40
   3   4   0   -6.90    4.20
   3   4   0    0.60    3.70
  -4  -4   0  941.61   28.60
  -4  -4   0  970.20   19.10
  -4  -4   0  974.30   27.70
  -4  -4   0  929.41   29.10
  -4  -4   0  964.00   29.10
   4   4   0  954.80   21.30
   4   4   0  981.60   28.10
   4   4   0  983.20   18.40
   4   4   0  973.20   29.70
  -5  -4   0   56.49    9.50
  -5  -4   0   59.49    9.30
  -5  -4   0   61.29   10.40
  -5  -4   0   57.79    6.30
  -5  -4   0   61.59    9.80
   5   4   0   52.09    8.50
   5   4   0   46.40    9.00
   5   4   0   55.09    5.50
  -6  -4   0   46.30   10.20
  -6  -4   0   44.90    7.10
  -6  -4   0   63.79   10.30
  -6  -4   0   63.69   10.30
   6   4   0   51.19    5.60
   6   4   0   61.49    9.80
   6   4   0   55.69   10.20
  -7  -4   0  201.78   15.70
  -7  -4   0  229.88   18.30
  -7  -4   0  226.28   14.60
  -7  -4   0  203.88   19.40
   7   4   0  224.88   17.60
   7   4   0  250.17   16.80
   7   4   0  219.28   10.30
  -8  -4   0  589.94   29.30
  -8  -4   0  528.75   24.10
  -8  -4   0  565.84   31.20
  -8  -4   0  610.64   26.50
   8   4   0  565.84   25.30
   8   4   0  609.94   30.70
   8   4   0  590.34   30.40
  -9  -4   0   95.69   14.00
  -9  -4   0   92.79   17.00
  -9  -4   0  125.69   18.40
   9   4   0  129.39   18.20
   9   4   0  107.99   16.70
   9   4   0  116.19   15.30
 -10  -4   0  150.48   21.50
  10   4   0  120.49   18.90
  10   4   0  144.59   20.00
   6  -5   0  118.89   19.30
   6  -5   0  115.59   17.80
  -6   5   0  158.48   19.50
  -6   5   0  151.38   20.90
   5  -5   0  106.09   16.50
   5  -5   0  143.89   18.40
  -5   5   0  140.09   19.30
  -5   5   0  143.39   18.10
   4  -5   0   89.59   14.20
   4  -5   0   74.89   13.10
  -4   5   0   67.49   13.10
  -4   5   0  108.89   15.90
   3  -5   0  330.27   21.20
   3  -5   0  294.87   19.30
   3  -5   0  319.87   14.50
  -3   5   0  375.66   21.30
  -3   5   0  304.17   20.20
   2  -5   0   -1.30    3.40
   2  -5   0    9.10    8.80
   2  -5   0   13.40    4.80
   2  -5   0    1.90    6.70
  -2   5   0   -0.80    6.00
  -2   5   0    9.00    5.70
  -2   5   0    5.80    2.30
   1  -5   0  211.58   14.70
   1  -5   0  201.58   16.20
   1  -5   0  216.28   11.60
   1  -5   0  195.78   10.60
  -1   5   0  215.38   14.60
  -1   5   0  207.58   13.30
  -1   5   0  217.18    9.20
   0  -5   0 1212.28   31.00
   0  -5   0 1152.08   27.50
   0  -5   0 1129.29   30.80
   0  -5   0 1114.89   31.50
   0   5   0 1208.88   32.60
   0   5   0 1184.98   27.10
   0   5   0 1098.39   28.20
  -1  -5   0 1063.49   29.70
  -1  -5   0 1041.70   29.70
  -1  -5   0 1037.40   28.90
  -1  -5   0 1016.70   26.60
   1   5   0 1004.70   23.50
   1   5   0 1029.00   26.50
   1   5   0 1038.70   28.50
  -2  -5   0   31.60    9.00
  -2  -5   0   36.30    7.90
  -2  -5   0   35.50    3.70
  -2  -5   0   27.20    7.90
  -2  -5   0   34.90    8.60
   2   5   0   44.00    7.60
   2   5   0   35.90    3.90
   2   5   0   39.00    7.10
  -3  -5   0   46.80    9.70
  -3  -5   0   28.20    8.00
  -3  -5   0   32.20    8.80
  -3  -5   0   46.50    9.00
   3   5   0   26.80    5.80
   3   5   0   36.50    7.70
  -4  -5   0   29.20    7.40
  -4  -5   0   25.10    7.90
  -4  -5   0   20.60    7.20
  -4  -5   0   16.10    7.20
   4   5   0   22.70    7.30
   4   5   0   28.20    5.40
  -5  -5   0  378.96   19.20
  -5  -5   0  385.86   19.80
  -5  -5   0  381.76   19.60
  -5  -5   0  388.16   10.90
  -5  -5   0  384.76   18.40
   5   5   0  412.36   13.30
   5   5   0  411.56   10.10
   5   5   0  407.36   19.20
   5   5   0  376.96   20.00
  -6  -5   0   14.90    8.30
  -6  -5   0    8.60    6.50
  -6  -5   0   11.40    7.20
  -6  -5   0   17.50    7.90
  -6  -5   0    9.80    4.20
   6   5   0    6.60    6.40
   6   5   0   17.10    6.80
   6   5   0   11.90    3.80
  -7  -5   0   10.00    8.90
  -7  -5   0    9.50    7.70
  -7  -5   0    6.40    6.80
  -7  -5   0   16.40    6.00
   7   5   0    7.90    6.80
   7   5   0   10.10    8.00
   7   5   0   18.70    5.40
  -8  -5   0  141.29   17.30
  -8  -5   0  146.29   13.70
  -8  -5   0  171.88   17.90
  -8  -5   0  133.59   18.20
   8   5   0  165.88   17.20
   8   5   0  166.08   19.50
  -9  -5   0  190.68   23.40
  -9  -5   0  138.39   18.60
  -9  -5   0  143.89   17.30
   9   5   0  166.88   18.00
   9   5   0  158.68   20.70
   9   5   0  136.49   18.60
 -10  -5   0   14.30   11.50
 -10  -5   0   -5.50   10.90
  10   5   0  -14.80    8.30
  10   5   0   -7.60    9.00
  10   5   0    6.70    8.80
   6  -6   0   15.80   15.00
   6  -6   0   41.30   16.60
  -6   6   0   28.10   13.50
  -6   6   0   37.60   13.50
   5  -6   0  138.69   19.90
   5  -6   0  121.69   18.70
  -5   6   0  153.98   20.80
  -5   6   0  113.89   17.30
   4  -6   0  427.56   27.40
   4  -6   0  435.86   28.10
  -4   6   0  373.26   25.40
  -4   6   0  369.26   24.70
   3  -6   0 2076.49   56.69
   3  -6   0 2143.39   56.79
  -3   6   0 2168.28   57.89
  -3   6   0 2177.68   58.29
   2  -6   0   28.00    6.20
   2  -6   0   34.00    6.80
   2  -6   0   10.30   10.10
   2  -6   0   49.60   12.80
  -2   6   0   18.40    8.70
  -2   6   0   40.70   10.40
   1  -6   0   -1.50    4.20
   1  -6   0   -1.90    8.90
   1  -6   0   -0.10    4.50
   1  -6   0    9.80    8.30
  -1   6   0    2.10    5.40
  -1   6   0   -0.80    6.00
  -1   6   0    3.90    3.50
   0  -6   0  172.98   11.20
   0  -6   0  174.28   15.00
   0  -6   0  188.58   16.20
   0  -6   0  181.18   13.00
   0   6   0  160.08   13.10
   0   6   0  185.78   12.10
   0   6   0  166.48   10.20
  -1  -6   0  214.28   14.40
  -1  -6   0  165.08   13.80
  -1  -6   0  193.08   15.10
  -1  -6   0  162.28   11.80
   1   6   0  176.28   10.10
   1   6   0  172.98   12.40
   1   6   0  190.88   11.60
  -2  -6   0  258.77   16.00
  -2  -6   0  270.57   16.80
  -2  -6   0  281.07   16.80
  -2  -6   0  280.97   15.20
   2   6   0  255.67   14.40
   2   6   0  235.98   13.50
   2   6   0  265.07    9.80
  -3  -6   0  315.97   18.70
  -3  -6   0  325.87   17.90
  -3  -6   0  291.67   16.10
  -3  -6   0  293.97   16.10
   3   6   0  321.27   14.70
   3   6   0  311.27   16.20
  -4  -6   0  163.88   12.60
  -4  -6   0  182.58   17.20
  -4  -6   0  141.59   13.60
  -4  -6   0  146.89   14.70
   4   6   0  137.89    9.70
   4   6   0  174.68   15.50
  -5  -6   0    7.30    6.20
  -5  -6   0    4.30    6.40
  -5  -6   0    1.30    5.70
  -5  -6   0    5.50    6.00
   5   6   0    1.10    3.70
   5   6   0   -1.50    5.10
   5   6   0   15.10    7.00
  -6  -6   0   68.49   12.30
  -6  -6   0   51.29   11.10
  -6  -6   0   71.89   12.50
  -6  -6   0   83.39   13.60
   6   6   0   56.79   12.00
   6   6   0   67.19    7.60
   6   6   0   58.99   11.90
  -7  -6   0  137.09   17.30
  -7  -6   0  110.29   14.80
  -7  -6   0  153.68   17.50
   7   6   0  157.58   17.40
   7   6   0  135.09   16.70
  -8  -6   0   27.40   10.90
  -8  -6   0   17.00    9.20
  -8  -6   0   10.60    9.90
   8   6   0    7.30    8.50
   8   6   0   14.30    9.20
  -9  -6   0   30.60   11.60
  -9  -6   0   18.90   12.40
  -9  -6   0   17.70   10.30
   9   6   0   23.00   11.60
   9   6   0   29.10   11.60
 -10  -6   0   48.10   13.10
 -10  -6   0    9.00   12.10
 -10  -6   0   77.19   18.00
  10   6   0   70.29   16.30
  10   6   0   43.10   13.10
  10   6   0   48.70   14.40
   5  -7   0    7.00   14.90
   5  -7   0   -3.20   13.20
  -5   7   0   34.10   12.50
  -5   7   0   41.80   13.80
   4  -7   0  171.68   22.20
   4  -7   0  213.38   23.60
  -4   7   0  198.88   22.30
  -4   7   0  204.78   23.40
   3  -7   0   44.30   13.90
   3  -7   0   32.40   15.10
  -3   7   0   49.60   12.80
  -3   7   0   27.80   12.30
   2  -7   0 1081.29   38.20
   2  -7   0 1132.39   40.70
  -2   7   0 1051.89   37.50
  -2   7   0 1095.99   39.60
   1  -7   0  263.37   15.70
   1  -7   0  207.68   20.00
   1  -7   0  237.58   20.60
   1  -7   0  245.68   14.20
  -1   7   0  267.77   18.10
  -1   7   0  253.97   18.30
   0  -7   0  108.79   14.30
   0  -7   0  113.79   11.20
   0  -7   0  100.19   12.20
   0  -7   0   85.59   13.10
   0   7   0  106.69   13.90
   0   7   0   97.39    9.80
   0   7   0  104.99   11.70
  -1  -7   0  196.18   13.30
  -1  -7   0  163.28   16.00
  -1  -7   0  209.08   16.90
  -1  -7   0  175.48   14.50
   1   7   0  158.98   14.70
   1   7   0  168.18   11.70
   1   7   0  191.78   12.80
  -2  -7   0   -1.70    5.10
  -2  -7   0   -2.30    6.90
  -2  -7   0   -1.50    5.90
  -2  -7   0   -4.00    6.10
   2   7   0   -0.90    4.50
   2   7   0   -1.60    3.10
   2   7   0    3.60    5.70
  -3  -7   0  583.24   24.40
  -3  -7   0  639.44   27.50
  -3  -7   0  637.14   24.20
  -3  -7   0  619.54   24.60
   3   7   0  612.24   12.80
   3   7   0  625.84   22.50
   3   7   0  636.54   24.40
  -4  -7   0    6.50    6.30
  -4  -7   0    4.20    6.80
  -4  -7   0   -2.50    5.70
  -4  -7   0   -6.50    5.90
   4   7   0    4.30    5.80
   4   7   0   -7.30    4.20
  -5  -7   0  277.97   18.40
  -5  -7   0  286.77   20.20
  -5  -7   0  270.77   18.00
  -5  -7   0  287.47   19.50
   5   7   0  280.37   18.30
   5   7   0  260.27   13.70
  -6  -7   0   20.20    9.70
  -6  -7   0   32.50   11.00
  -6  -7   0   31.90    9.50
  -6  -7   0   27.30    9.70
   6   7   0   31.50    6.50
   6   7   0   22.80    9.70
   6   7   0   18.00    8.30
  -7  -7   0    6.20    8.00
  -7  -7   0    1.30    9.20
  -7  -7   0   10.70    9.90
  -7  -7   0    4.30    7.90
   7   7   0   11.90    9.70
   7   7   0    0.30    8.30
  -8  -7   0   12.60   10.90
  -8  -7   0    0.70    9.20
  -8  -7   0    1.20    9.70
   8   7   0   10.80    9.80
   8   7   0    9.80    8.70
  -9  -7   0   20.60   11.60
  -9  -7   0   19.10   12.50
  -9  -7   0   19.60   10.90
   9   7   0    9.90    9.50
   9   7   0   14.70   11.10
 -10  -7   0    9.30   10.60
 -10  -7   0   11.60   11.70
 -10  -7   0   -2.30    9.90
  10   7   0    6.10    9.30
  10   7   0   10.00   10.60
   4  -8   0  -12.50   12.80
   4  -8   0  -24.00   12.90
  -4   8   0   -6.90    9.90
  -4   8   0   10.60   10.40
   3  -8   0   14.30   15.40
   3  -8   0   40.50   16.50
  -3   8   0   54.49   13.80
  -3   8   0   35.20   12.30
   2  -8   0   27.20   13.70
   2  -8   0   17.90   12.80
  -2   8   0   18.80   11.40
  -2   8   0   23.10   10.10
   1  -8   0    2.30   11.20
   1  -8   0   16.00   11.60
  -1   8   0   10.20    8.90
  -1   8   0    7.60    7.80
   0  -8   0   21.00   10.80
   0  -8   0    4.80    7.00
   0  -8   0   16.40   12.10
   0  -8   0   10.10    7.00
   0   8   0   13.30    7.30
   0   8   0    6.60    5.50
   0   8   0   21.60    9.80
  -1  -8   0  336.77   18.30
  -1  -8   0  368.06   21.90
  -1  -8   0  351.26   21.50
  -1  -8   0  291.07   19.30
   1   8   0  314.27   16.50
   1   8   0  326.97   16.90
   1   8   0  304.47   19.60
  -2  -8   0  385.36   22.80
  -2  -8   0  377.16   21.70
  -2  -8   0  414.36   20.50
  -2  -8   0  387.36   22.70
   2   8   0  422.96   21.90
   2   8   0  410.96   20.10
   2   8   0  405.16   15.60
  -3  -8   0  233.48   19.30
  -3  -8   0  250.17   17.40
  -3  -8   0  247.08   17.70
  -3  -8   0  265.97   19.80
   3   8   0  242.58   17.10
   3   8   0  257.27   16.80
  -4  -8   0   88.19   14.10
  -4  -8   0  108.49   14.70
  -4  -8   0   99.49   14.80
  -4  -8   0   87.09   12.70
   4   8   0   95.49   11.60
   4   8   0   82.29   13.00
  -5  -8   0   72.79   14.00
  -5  -8   0   82.09   14.00
  -5  -8   0   86.19   14.40
  -5  -8   0   65.29   12.20
   5   8   0   74.49   10.10
   5   8   0   78.39   12.20
  -6  -8   0   47.60   12.00
  -6  -8   0   44.70   11.80
  -6  -8   0   68.09   13.20
  -6  -8   0   45.00   11.80
   6   8   0   50.29    8.40
   6   8   0   64.69   12.60
   6   8   0   46.80   12.10
  -7  -8   0  257.27   20.20
  -7  -8   0  277.27   25.20
  -7  -8   0  260.77   25.50
  -7  -8   0  275.47   22.60
   7   8   0  249.08   20.00
   7   8   0  282.57   23.00
  -8  -8   0  143.19   20.30
  -8  -8   0  128.09   18.20
  -8  -8   0  153.08   20.50
   8   8   0  110.49   17.10
   8   8   0  106.99   17.90
  -9  -8   0  167.78   20.60
  -9  -8   0  202.48   24.00
  -9  -8   0  208.28   24.40
   9   8   0  156.48   19.70
   9   8   0  177.38   22.50
 -10  -8   0   48.40   15.90
 -10  -8   0   48.50   14.00
 -10  -8   0   56.09   15.50
  10   8   0   56.09   15.20
  10   8   0   63.19   17.20
   3  -9   0   81.19   19.70
   3  -9   0   80.59   19.20
  -3   9   0   90.49   17.10
  -3   9   0   92.79   18.00
   2  -9   0   36.40   16.20
   2  -9   0    9.60   14.40
  -2   9   0   13.40   10.40
  -2   9   0   18.00   10.10
   1  -9   0    2.90   11.20
   1  -9   0   26.70   14.60
  -1   9   0    0.10    8.50
  -1   9   0   24.00    9.80
   0  -9   0   48.30   14.70
   0  -9   0   72.89   12.80
   0  -9   0   47.30   15.00
   0   9   0   46.30   11.70
   0   9   0   54.59   11.50
  -1  -9   0  227.78   18.70
  -1  -9   0  232.48   21.30
  -1  -9   0  238.58   17.20
  -1  -9   0  220.88   20.80
   1   9   0  220.98   20.90
   1   9   0  211.98   15.50
  -2  -9   0  126.69   17.60
  -2  -9   0  113.89   16.00
  -2  -9   0  142.49   17.70
  -2  -9   0  118.89   14.40
   2   9   0  112.89   14.50
   2   9   0  149.59   15.30
  -3  -9   0   65.49   11.90
  -3  -9   0   62.69   13.30
  -3  -9   0   55.99   12.80
  -3  -9   0   58.99   12.80
   3   9   0   68.39   12.50
   3   9   0   56.49   11.40
  -4  -9   0  895.41   34.50
  -4  -9   0  867.81   33.80
  -4  -9   0  885.71   35.90
  -4  -9   0  920.81   38.00
   4   9   0  870.01   33.90
   4   9   0  894.71   31.20
  -5  -9   0  127.69   16.60
  -5  -9   0  182.98   19.40
  -5  -9   0  148.89   20.40
  -5  -9   0  184.58   20.30
   5   9   0  141.59   14.30
   5   9   0  115.89   15.70
  -6  -9   0   83.89   16.10
  -6  -9   0   94.89   16.60
  -6  -9   0   78.09   14.70
  -6  -9   0   73.49   13.70
   6   9   0   61.59   13.70
   6   9   0  103.99   16.50
   6   9   0   84.89   11.20
  -7  -9   0   34.40   11.00
  -7  -9   0   22.50   10.80
  -7  -9   0    7.70   11.50
  -7  -9   0   23.00   10.80
   7   9   0   27.20   12.10
   7   9   0   26.30   10.40
  -8  -9   0   11.20   10.30
  -8  -9   0    9.60   11.30
  -8  -9   0    6.40   11.00
  -8  -9   0   23.10   11.70
   8   9   0   10.30   10.30
   8   9   0   -8.70    8.30
  -9  -9   0   82.39   17.90
  -9  -9   0   80.89   17.20
  -9  -9   0  136.29   20.20
   9   9   0   88.79   16.60
   9   9   0  100.99   18.40
 -10  -9   0  113.39   20.70
 -10  -9   0  132.59   21.00
 -10  -9   0  181.98   24.10
  10   9   0  171.18   22.90
  10   9   0  102.29   19.40
   1 -10   0  -12.20    9.90
   1 -10   0   -2.90   12.70
  -1  10   0   12.50   11.00
   0 -10   0    7.80   12.50
   0 -10   0   24.90   13.00
   0  10   0   21.50   10.60
  -1 -10   0   10.50   11.90
  -1 -10   0   14.00   10.20
  -1 -10   0   14.90   13.00
   1  10   0   11.70    8.90
  -2 -10   0  157.58   19.60
  -2 -10   0  122.39   17.60
  -2 -10   0  123.79   15.20
  -2 -10   0  119.39   18.70
   2  10   0  101.49   14.10
   2  10   0  140.99   17.20
  -3 -10   0   12.10   12.10
  -3 -10   0    0.90    9.00
  -3 -10   0    5.30    8.00
  -3 -10   0   20.80   12.10
   3  10   0    6.10    8.50
   3  10   0   10.30    8.40
  -4 -10   0   49.70   12.50
  -4 -10   0   56.29   15.00
  -4 -10   0   48.30   13.90
  -4 -10   0   40.90   12.50
   4  10   0   45.70   11.80
   4  10   0   45.70   10.80
  -5 -10   0  362.06   25.10
  -5 -10   0  383.26   25.50
  -5 -10   0  401.16   28.40
  -5 -10   0  405.06   25.80
   5  10   0  390.76   25.20
   5  10   0  391.96   21.50
  -6 -10   0   46.80   12.90
  -6 -10   0   34.60   11.60
  -6 -10   0   39.20   12.50
  -6 -10   0   43.90   13.90
   6  10   0   32.10   11.30
   6  10   0   52.59   10.10
   6  10   0   26.70   12.30
  -7 -10   0  111.39   18.20
  -7 -10   0  109.49   17.00
  -7 -10   0  104.39   18.30
  -7 -10   0  115.09   20.50
   7  10   0  139.29   19.70
   7  10   0  118.79   18.30
  -8 -10   0   36.60   12.40
  -8 -10   0   18.70   13.10
  -8 -10   0   40.70   14.20
  -8 -10   0    7.00   10.60
   8  10   0   39.30   12.30
   8  10   0   32.20   13.40
  -9 -10   0    5.20   10.30
  -9 -10   0   13.60   11.30
  -9 -10   0   -4.90    9.60
   9  10   0   13.80   12.70
   9  10   0   12.20    9.70
   0 -11   0   -8.30   11.90
   0 -11   0   43.60   15.80
   0  11   0   -1.50    9.80
  -1 -11   0   20.10   14.20
  -1 -11   0    7.20   10.20
   1  11   0    2.70    8.70
  -2 -11   0   14.10   11.20
  -2 -11   0    4.10   10.00
  -2 -11   0    5.10   12.80
   2  11   0   -8.60    6.80
  -3 -11   0    7.00   11.60
  -3 -11   0   14.50   12.30
  -3 -11   0   -6.60   10.40
  -3 -11   0    8.30    9.30
   3  11   0    1.20    8.00
   3  11   0   14.90    9.10
  -4 -11   0  115.89   16.90
  -4 -11   0   94.39   17.70
  -4 -11   0  101.29   18.20
  -4 -11   0   74.99   14.90
   4  11   0  100.39   16.00
   4  11   0  119.79   16.40
  -5 -11   0   20.50   11.30
  -5 -11   0   24.80   14.50
  -5 -11   0   22.30   12.50
  -5 -11   0   25.20   11.90
   5  11   0   14.50    9.40
   5  11   0   17.10    9.70
  -6 -11   0  106.69   17.20
  -6 -11   0  121.99   19.80
  -6 -11   0  102.39   17.60
  -6 -11   0  114.49   20.30
   6  11   0  110.99   17.10
   6  11   0  125.69   19.60
   6  11   0  128.49   15.40
  -7 -11   0   45.00   16.00
  -7 -11   0   51.49   13.80
  -7 -11   0   61.49   15.60
  -7 -11   0   50.09   14.50
   7  11   0   69.59   16.00
   7  11   0   48.00   14.60
  -8 -11   0   31.60   13.80
  -8 -11   0   38.70   14.70
  -8 -11   0   70.09   17.30
  -8 -11   0   51.29   14.30
   8  11   0   23.50   13.30
   8  11   0   22.40   11.70
  -3 -12   0   77.09   16.10
  -3 -12   0   71.49   15.90
  -3 -12   0   91.99   17.00
   3  12   0   64.29   14.60
  -4 -12   0   32.20   14.30
  -4 -12   0   17.10   11.60
  -4 -12   0   43.10   14.70
   4  12   0   19.90   10.50
   4  12   0   31.90   11.50
  -5 -12   0  188.08   22.60
  -5 -12   0  163.28   22.30
  -5 -12   0  189.28   23.30
  -5 -12   0  178.38   21.50
   5  12   0  144.49   19.90
   5  12   0  209.78   21.80
  -6 -12   0    0.30    9.10
  -6 -12   0   -4.80   11.70
  -6 -12   0   -2.80   10.30
  -6 -12   0    7.10   10.30
   6  12   0   17.60   10.90
   6  12   0    3.40    9.10
  -7 -12   0   -9.50   11.20
   7  12   0   20.10   11.70
   6  12  -1  133.39   19.10
   6  12  -1  129.99   20.70
  -6 -12   1  126.09   20.90
  -6 -12   1  147.29   20.00
  -6 -12   1   97.79   19.20
  -6 -12   1  117.49   20.50
   5  12  -1    3.80    9.90
   5  12  -1    8.70    9.50
  -5 -12   1   16.50   10.70
  -5 -12   1  -12.20    9.40
  -5 -12   1   12.50   11.00
  -5 -12   1   12.50   11.20
   4  12  -1    0.90    8.80
   4  12  -1   -7.80    8.20
  -4 -12   1   25.00   11.70
  -4 -12   1   -1.30    9.10
  -4 -12   1   11.80   10.50
  -4 -12   1    0.70   11.20
   3  12  -1   93.09   16.40
  -3 -12   1   65.39   16.10
  -3 -12   1   80.89   16.50
  -3 -12   1   47.10   13.20
   8  11  -1   16.60   11.00
   8  11  -1    6.70   11.50
  -8 -11   1   17.90   12.30
  -8 -11   1   35.30   14.90
  -8 -11   1   21.90   14.90
  -8 -11   1   26.40   12.00
   7  11  -1   55.69   15.70
   7  11  -1   62.29   14.50
  -7 -11   1   68.49   16.30
  -7 -11   1   57.49   14.70
  -7 -11   1   42.00   15.00
  -7 -11   1   75.59   17.30
   6  11  -1   83.49   15.10
   6  11  -1   92.59   14.10
  -6 -11   1  106.89   17.30
  -6 -11   1  100.89   18.20
  -6 -11   1   72.59   15.70
  -6 -11   1  100.59   19.90
   5  11  -1    6.20    8.60
   5  11  -1   10.40    9.60
  -5 -11   1   28.20   11.80
  -5 -11   1    9.70   10.70
  -5 -11   1    4.80   10.30
  -5 -11   1   18.50   11.20
   4  11  -1   13.40    9.10
   4  11  -1   -5.80    7.60
  -4 -11   1   -8.50    8.30
  -4 -11   1   -1.20    9.70
  -4 -11   1    2.40   10.40
  -4 -11   1    8.70   12.50
   3  11  -1   -6.80    7.20
   3  11  -1    2.80    7.70
  -3 -11   1    9.60   12.00
  -3 -11   1   -8.90    9.40
  -3 -11   1    4.60    9.30
  -3 -11   1   12.70   10.50
   2  11  -1   22.50   10.90
  -2 -11   1   30.70   14.00
  -2 -11   1   11.20   11.70
  -2 -11   1    0.90   10.10
   1  11  -1   50.19   13.20
  -1 -11   1   41.90   15.20
  -1 -11   1   45.70   13.40
   0  11  -1   10.90   10.50
   0 -11   1   15.80   15.20
   0 -11   1   12.60   11.50
   9  10  -1    0.60   10.00
   9  10  -1   -5.10    8.30
  -9 -10   1  -17.40    8.60
  -9 -10   1    4.00   10.90
  -9 -10   1    6.30   12.80
  -9 -10   1    1.70   10.20
   8  10  -1   43.20   14.20
   8  10  -1   72.69   15.20
  -8 -10   1   63.89   16.10
  -8 -10   1   33.60   12.90
  -8 -10   1   70.39   18.00
  -8 -10   1   39.80   14.50
   7  10  -1   68.49   15.50
   7  10  -1   47.50   13.00
  -7 -10   1   68.39   16.90
  -7 -10   1   69.29   17.10
  -7 -10   1   50.29   13.80
  -7 -10   1   54.49   13.00
   6  10  -1   16.00    8.40
   6  10  -1    2.20    8.50
  -6 -10   1    4.50   10.50
  -6 -10   1   31.80   13.10
  -6 -10   1   15.90   10.60
  -6 -10   1   21.80   12.00
   5  10  -1   76.79   14.70
   5  10  -1  105.39   14.20
  -5 -10   1   97.09   15.80
  -5 -10   1  135.79   18.50
  -5 -10   1  114.09   18.00
  -5 -10   1  106.79   17.90
   4  10  -1   43.80   11.50
   4  10  -1   38.20   10.60
  -4 -10   1   37.00   13.00
  -4 -10   1   45.60   12.30
  -4 -10   1   41.00   12.50
  -4 -10   1   43.50   12.40
   3  10  -1  211.88   20.30
   3  10  -1  165.78   18.50
  -3 -10   1  205.68   20.70
  -3 -10   1  200.38   21.20
  -3 -10   1  187.48   19.40
  -3 -10   1  206.58   22.60
   2  10  -1   19.80    8.60
   2  10  -1   36.50   11.60
  -2 -10   1   30.30   13.10
  -2 -10   1   32.50   10.70
  -2 -10   1   23.90   12.10
  -2 -10   1   24.70   11.70
   1  10  -1   94.69   15.50
  -1 -10   1   84.69   17.50
  -1 -10   1   57.39   13.70
  -1 -10   1   39.10   13.00
   0  10  -1  119.59   18.60
   0 -10   1   88.49   18.00
   0 -10   1  106.69   18.70
  -1  10  -1   87.99   16.20
   1 -10   1   94.49   18.90
   1 -10   1   60.09   15.90
   9   9  -1   67.29   16.10
   9   9  -1   98.69   18.70
  -9  -9   1   61.89   15.30
  -9  -9   1  115.49   18.90
  -9  -9   1  130.79   21.20
   8   9  -1   44.70   12.20
   8   9  -1   39.40   12.90
  -8  -9   1   66.89   14.00
  -8  -9   1   48.00   13.30
  -8  -9   1   74.29   17.20
  -8  -9   1   24.40   13.20
   7   9  -1    9.90    9.80
   7   9  -1    4.80   10.00
  -7  -9   1    2.00   10.20
  -7  -9   1   12.40   11.10
  -7  -9   1   14.40    9.90
  -7  -9   1   10.70   10.30
   6   9  -1   13.70    9.70
   6   9  -1   -4.20    6.40
  -6  -9   1   -5.30    9.00
  -6  -9   1   16.30    9.80
  -6  -9   1   12.60   10.00
  -6  -9   1    9.80    9.30
   5   9  -1  241.78   19.20
   5   9  -1  227.18   16.90
  -5  -9   1  205.58   21.30
  -5  -9   1  207.58   22.20
  -5  -9   1  203.48   21.00
  -5  -9   1  211.08   20.10
   4   9  -1  181.78   18.70
   4   9  -1  173.28   16.40
  -4  -9   1  214.18   18.90
  -4  -9   1  163.88   19.10
  -4  -9   1  167.48   19.00
  -4  -9   1  178.48   21.80
   3   9  -1  592.74   27.30
   3   9  -1  662.73   28.10
  -3  -9   1  617.44   28.40
  -3  -9   1  633.74   30.80
  -3  -9   1  644.54   28.80
  -3  -9   1  613.04   31.30
   2   9  -1   15.60    8.10
   2   9  -1    6.20    8.10
  -2  -9   1   14.60   10.30
  -2  -9   1   27.80   11.90
  -2  -9   1   36.10   10.30
  -2  -9   1   29.10   10.30
   1   9  -1    3.20    6.00
   1   9  -1    8.20    9.10
  -1  -9   1    3.40    9.90
  -1  -9   1  -16.60   11.00
  -1  -9   1   -2.40    7.90
  -1  -9   1   10.30    8.10
   0   9  -1  218.88   21.40
   0   9  -1  205.68   16.70
   0  -9   1  207.58   17.40
   0  -9   1  175.68   16.90
   0  -9   1  186.08   20.50
   0  -9   1  226.38   23.00
  -1   9  -1   -6.70    7.30
  -1   9  -1   14.10   10.50
   1  -9   1   -3.20   10.50
   1  -9   1  -10.10   12.30
  -2   9  -1   -3.20    8.80
  -2   9  -1   -3.70    9.10
   2  -9   1   -3.10   12.10
   2  -9   1   -1.80   12.90
  -3   9  -1   -3.40   10.30
  -3   9  -1    9.90    9.30
   3  -9   1  -28.20   13.40
   3  -9   1   26.30   15.30
  10   8  -1    7.50   10.70
  10   8  -1   -6.20    8.80
 -10  -8   1   -3.40   11.80
 -10  -8   1    1.10    9.90
 -10  -8   1   -6.00    8.30
   9   8  -1   13.10   10.50
   9   8  -1    1.00    9.20
  -9  -8   1   15.20   10.70
  -9  -8   1    6.70   11.80
  -9  -8   1    5.80   11.30
   8   8  -1    6.30    9.40
   8   8  -1    6.10    8.70
  -8  -8   1   -4.00    8.60
  -8  -8   1   12.10   10.00
  -8  -8   1   -5.30    9.00
  -8  -8   1   13.10   11.50
   7   8  -1  418.06   26.00
   7   8  -1  382.76   26.00
  -7  -8   1  412.86   26.50
  -7  -8   1  386.16   23.30
  -7  -8   1  438.46   27.40
  -7  -8   1  385.76   26.40
   6   8  -1   57.89    9.60
   6   8  -1   58.39   12.30
  -6  -8   1   53.09   12.50
  -6  -8   1   39.80   11.40
  -6  -8   1   56.39   12.20
  -6  -8   1   58.09   13.00
   5   8  -1  541.35   21.80
   5   8  -1  518.55   25.90
  -5  -8   1  526.85   28.70
  -5  -8   1  518.15   27.30
  -5  -8   1  554.94   25.40
  -5  -8   1  591.14   28.30
   4   8  -1   42.60    9.00
   4   8  -1   38.10    9.60
  -4  -8   1   43.00   10.30
  -4  -8   1   49.99   12.10
  -4  -8   1   50.39   11.70
  -4  -8   1   43.00   11.40
   3   8  -1   96.89   12.40
   3   8  -1   92.09   12.40
  -3  -8   1  104.89   14.70
  -3  -8   1  138.59   17.00
  -3  -8   1   68.59   12.00
  -3  -8   1   78.99   12.20
   2   8  -1  115.09   13.30
   2   8  -1   88.69    8.60
   2   8  -1   86.89   12.20
  -2  -8   1   95.09   12.80
  -2  -8   1  105.09   13.80
  -2  -8   1   79.89   13.00
  -2  -8   1   91.79   14.10
   1   8  -1   22.00    7.10
   1   8  -1   17.40    6.40
   1   8  -1   34.50    9.60
  -1  -8   1   23.40    8.60
  -1  -8   1   34.40   11.70
  -1  -8   1    8.80   10.80
  -1  -8   1   33.00    9.70
   0   8  -1  317.67   16.40
   0   8  -1  317.07   18.00
   0   8  -1  334.77   22.10
   0  -8   1  292.87   22.40
   0  -8   1  314.57   21.80
   0  -8   1  285.27   17.90
   0  -8   1  344.07   19.70
  -1   8  -1   52.69   10.70
  -1   8  -1   94.49   14.40
   1  -8   1   61.99   14.20
   1  -8   1   61.39   10.60
   1  -8   1   83.79   15.60
  -2   8  -1  400.26   24.30
  -2   8  -1  388.36   26.10
   2  -8   1  415.26   27.10
   2  -8   1  407.76   26.20
  -3   8  -1  166.68   20.10
  -3   8  -1  176.78   19.90
   3  -8   1  142.99   20.00
   3  -8   1  146.89   22.50
  -4   8  -1    1.70   10.20
  -4   8  -1    3.80    9.20
   4  -8   1  -22.60   11.50
   4  -8   1   -4.80   15.50
  10   7  -1   54.99   14.30
  10   7  -1   57.59   16.10
 -10  -7   1   46.10   15.90
 -10  -7   1   71.99   16.60
 -10  -7   1   35.90   14.20
   9   7  -1  178.28   21.20
   9   7  -1  170.38   22.60
  -9  -7   1  143.89   19.40
  -9  -7   1  148.99   21.90
  -9  -7   1  161.08   19.80
   8   7  -1  245.98   25.20
   8   7  -1  272.77   21.30
  -8  -7   1  270.87   24.40
  -8  -7   1  231.78   24.20
  -8  -7   1  272.87   26.10
  -8  -7   1  261.87   22.70
   7   7  -1   82.49    9.40
   7   7  -1   87.19   14.40
   7   7  -1   70.29   14.00
  -7  -7   1   95.69   15.70
  -7  -7   1   69.19   13.20
  -7  -7   1   86.09   14.70
  -7  -7   1   92.99   15.90
   6   7  -1   29.40    9.60
   6   7  -1   20.60    6.40
  -6  -7   1   11.00    8.70
  -6  -7   1   35.00   11.20
  -6  -7   1   15.30    8.20
  -6  -7   1   15.20    9.60
   5   7  -1  121.69   11.00
   5   7  -1   96.69   12.90
  -5  -7   1  118.09   13.60
  -5  -7   1  127.69   16.40
  -5  -7   1   90.29   13.30
  -5  -7   1  129.19   14.80
   4   7  -1   19.20    7.10
   4   7  -1    6.00    5.70
  -4  -7   1   14.50    7.50
  -4  -7   1   13.40    7.90
  -4  -7   1   28.10    7.80
  -4  -7   1   16.90    7.50
   3   7  -1   -2.90    5.20
   3   7  -1    9.70    5.90
   3   7  -1    0.20    2.10
  -3  -7   1    4.20    5.70
  -3  -7   1   -5.80    5.90
  -3  -7   1   14.30    7.30
  -3  -7   1   -6.10    4.60
   2   7  -1    1.40    5.60
   2   7  -1    2.90    5.00
   2   7  -1    2.40    3.30
  -2  -7   1   -4.30    7.20
  -2  -7   1    0.80    5.80
  -2  -7   1    7.10    6.60
  -2  -7   1    2.70    6.60
   1   7  -1  290.17   15.00
   1   7  -1  204.68   15.20
   1   7  -1  255.07   13.00
  -1  -7   1  272.37   17.30
  -1  -7   1  267.77   18.70
  -1  -7   1  270.77   16.00
  -1  -7   1  252.17   17.50
   0   7  -1   27.50    7.00
   0   7  -1   27.00    6.60
   0   7  -1   38.90    9.60
   0  -7   1   26.40    7.70
   0  -7   1   13.00   10.00
   0  -7   1   23.60   10.80
   0  -7   1   50.49    9.00
  -1   7  -1  646.84   28.10
  -1   7  -1  692.93   23.80
  -1   7  -1  653.23   25.70
   1  -7   1  689.93   28.20
   1  -7   1  767.12   25.30
   1  -7   1  716.53   25.00
   1  -7   1  640.24   29.90
  -2   7  -1  398.26   22.40
  -2   7  -1  353.76   22.30
   2  -7   1  359.96   18.20
   2  -7   1  307.17   25.00
   2  -7   1  328.97   22.50
  -3   7  -1  705.13   32.10
  -3   7  -1  732.93   33.30
   3  -7   1  694.13   32.80
   3  -7   1  707.93   34.10
  -4   7  -1   14.90   10.30
  -4   7  -1   26.60   12.00
   4  -7   1   15.50   12.20
   4  -7   1   15.20   13.60
  -5   7  -1   85.69   17.00
  -5   7  -1   93.09   18.40
   5  -7   1   51.09   17.70
   5  -7   1   93.59   21.00
  10   6  -1   79.29   16.70
  10   6  -1   66.09   16.50
  10   6  -1   59.99   13.70
 -10  -6   1   61.09   17.60
 -10  -6   1   46.60   15.30
 -10  -6   1   64.19   14.90
   9   6  -1   -0.30    8.60
   9   6  -1    2.60    9.10
  -9  -6   1   22.00   12.80
  -9  -6   1    0.00    8.20
  -9  -6   1   15.50   11.00
   8   6  -1   -0.60    7.50
   8   6  -1    6.50    7.90
  -8  -6   1    6.50    9.20
  -8  -6   1    0.60    9.80
  -8  -6   1    2.70    8.60
   7   6  -1  277.77   13.40
   7   6  -1  300.27   19.90
   7   6  -1  307.77   21.80
  -7  -6   1  254.27   19.60
  -7  -6   1  281.47   20.60
  -7  -6   1  296.67   21.40
  -7  -6   1  237.28   22.00
   6   6  -1   74.09   12.30
   6   6  -1   44.60    9.50
   6   6  -1   56.09    7.50
  -6  -6   1   55.79   11.70
  -6  -6   1   57.69   11.60
  -6  -6   1   53.79   11.20
  -6  -6   1   54.09   11.30
   5   6  -1  141.69   10.00
  -5  -6   1  125.49   15.20
  -5  -6   1  126.39   13.20
  -5  -6   1  119.29   13.80
  -5  -6   1  143.39   16.00
   4   6  -1   -2.00    4.50
   4   6  -1    0.00    4.30
  -4  -6   1   -6.90    4.70
  -4  -6   1   14.80    6.50
  -4  -6   1    1.00    5.90
  -4  -6   1    0.60    5.90
   3   6  -1   61.89    8.50
   3   6  -1   57.59    9.10
  -3  -6   1   52.39    2.90
  -3  -6   1   71.49   11.00
  -3  -6   1   49.20    9.60
  -3  -6   1   63.29    9.60
  -3  -6   1   80.29   11.10
   2   6  -1  269.27   14.70
   2   6  -1  259.57    9.40
   2   6  -1  265.47   14.60
  -2  -6   1  241.78   15.50
  -2  -6   1  264.27   15.50
  -2  -6   1  266.47   15.40
  -2  -6   1  259.57   16.50
   1   6  -1  485.25   18.30
   1   6  -1  485.25   20.30
   1   6  -1  470.45   15.70
  -1  -6   1  500.35   21.00
  -1  -6   1  493.25   19.40
  -1  -6   1  458.65   20.30
  -1  -6   1  480.35   19.30
   0   6  -1    6.70    3.70
   0   6  -1   -4.20    4.40
   0   6  -1   -4.60    3.50
   0  -6   1   -4.00    7.10
   0  -6   1   -2.50    4.30
   0  -6   1   -3.30    6.40
   0  -6   1    1.30    4.80
  -1   6  -1   24.30    8.40
  -1   6  -1   38.20    8.00
  -1   6  -1   32.10    5.30
   1  -6   1   15.30    5.90
   1  -6   1   16.40    9.30
   1  -6   1   29.20    7.00
   1  -6   1   19.90    9.20
  -2   6  -1  165.88   15.90
  -2   6  -1  156.38   15.80
   2  -6   1  179.08   11.00
   2  -6   1  168.98   12.90
   2  -6   1  165.98   16.80
   2  -6   1  173.98   17.80
  -3   6  -1   32.80   10.80
  -3   6  -1   30.00   10.10
   3  -6   1   56.99   13.70
   3  -6   1   60.39   13.90
   3  -6   1   24.40    8.00
  -4   6  -1  346.57   23.00
  -4   6  -1  328.57   22.90
   4  -6   1  290.77   25.10
   4  -6   1  351.56   25.00
  -5   6  -1   11.00    9.60
  -5   6  -1    9.80   10.20
   5  -6   1   10.40   12.60
   5  -6   1  -15.70   11.70
  -6   6  -1    3.20   11.50
  -6   6  -1   -1.30    9.30
   6  -6   1  -18.70   10.70
   6  -6   1   -3.90   11.40
  10   5  -1  285.47   21.70
  10   5  -1  282.77   28.70
  10   5  -1  300.87   28.70
 -10  -5   1  303.17   28.70
 -10  -5   1  269.17   28.90
   9   5  -1   61.79   12.90
   9   5  -1   40.00   12.70
   9   5  -1   34.20   12.30
  -9  -5   1   53.99   15.50
  -9  -5   1   41.90   13.30
  -9  -5   1   20.10   10.20
   8   5  -1   53.49   13.40
   8   5  -1   32.50   10.40
  -8  -5   1   47.00    9.70
  -8  -5   1   37.20   12.10
  -8  -5   1   55.19   12.10
  -8  -5   1   40.20   11.40
   7   5  -1    1.40    4.30
   7   5  -1   -4.90    5.30
   7   5  -1    5.30    7.40
  -7  -5   1    1.50    5.80
  -7  -5   1   -9.30    6.00
  -7  -5   1   -3.00    7.10
  -7  -5   1    0.90    7.70
   6   5  -1  122.49   15.40
   6   5  -1  133.59   14.40
   6   5  -1  114.29    8.90
  -6  -5   1  137.99   14.80
  -6  -5   1  122.59   14.80
  -6  -5   1  151.88   16.40
  -6  -5   1  114.69    9.70
  -6  -5   1  141.59   16.30
   5   5  -1   80.69    7.80
   5   5  -1   86.69   11.00
   5   5  -1   82.19    5.90
  -5  -5   1  103.99   11.80
  -5  -5   1   78.19   10.90
  -5  -5   1   87.89   12.40
  -5  -5   1   78.39   11.30
  -5  -5   1   72.69    6.20
   4   5  -1  953.90   29.20
   4   5  -1  919.31   23.80
   4   5  -1  935.41   17.00
   4   5  -1  945.51   16.90
  -4  -5   1  875.41   30.20
  -4  -5   1  947.61   30.40
  -4  -5   1  901.41   28.70
  -4  -5   1  968.60   27.70
   3   5  -1   52.99    7.60
   3   5  -1   69.49    9.40
  -3  -5   1   62.49   10.10
  -3  -5   1   37.50    8.80
  -3  -5   1   45.20    9.20
  -3  -5   1   50.59    9.00
   2   5  -1  225.28   12.90
   2   5  -1  235.88   13.60
   2   5  -1  226.38    7.70
  -2  -5   1  237.98    8.40
  -2  -5   1  257.77   15.70
  -2  -5   1  205.98   14.00
  -2  -5   1  242.68   14.90
  -2  -5   1  232.18   14.20
   1   5  -1   61.59    8.60
   1   5  -1   62.09    6.30
   1   5  -1   75.29    8.60
  -1  -5   1   59.19    9.30
  -1  -5   1   54.69   10.30
  -1  -5   1   57.79    8.30
  -1  -5   1   62.19    9.20
   0   5  -1  567.84   17.70
   0   5  -1  542.75   18.10
   0   5  -1  598.34   21.30
   0  -5   1  576.24   20.30
   0  -5   1  573.34   20.50
   0  -5   1  586.94   22.20
   0  -5   1  593.14   19.80
  -1   5  -1    4.60    3.20
  -1   5  -1   -0.40    4.60
  -1   5  -1   -3.20    4.70
   1  -5   1    0.60    7.80
   1  -5   1    4.40    4.80
   1  -5   1    0.40    6.20
   1  -5   1    4.00    4.00
  -2   5  -1   63.39   10.20
  -2   5  -1   74.79   10.70
  -2   5  -1   72.19    5.20
   2  -5   1   75.19    9.00
   2  -5   1   65.99   10.70
   2  -5   1   69.39    7.10
   2  -5   1   64.39   11.30
  -3   5  -1    3.80    7.40
  -3   5  -1    4.60    7.00
   3  -5   1   13.90    6.60
   3  -5   1   -8.40    8.00
   3  -5   1    4.30    8.90
  -4   5  -1    5.40    7.70
  -4   5  -1   11.70    9.30
   4  -5   1   10.10   10.20
   4  -5   1   -0.30    6.30
   4  -5   1   23.20   10.60
  -5   5  -1   -1.10    8.50
  -5   5  -1  -10.60    7.00
   5  -5   1  -12.30    8.10
   5  -5   1    2.80   10.20
  -6   5  -1   66.29   15.30
  -6   5  -1   56.49   13.90
   6  -5   1   31.90   12.90
   6  -5   1   63.59   15.30
  -7   5  -1   28.10   14.10
  -7   5  -1   14.60   10.70
   7  -5   1   -7.70   10.70
   7  -5   1    1.80   10.90
  10   4  -1   18.70   12.00
  10   4  -1   48.70   13.30
 -10  -4   1   19.20   11.40
   9   4  -1   82.19   12.90
   9   4  -1   95.09   16.00
   9   4  -1   75.69   15.30
  -9  -4   1   80.39   15.60
  -9  -4   1   81.59   13.80
  -9  -4   1  102.49   18.10
   8   4  -1  128.19   17.10
   8   4  -1  136.59   15.50
   8   4  -1  113.29   16.90
  -8  -4   1  121.99   17.20
  -8  -4   1  141.39   16.30
  -8  -4   1  124.09   17.40
  -8  -4   1  114.19   14.10
   7   4  -1   34.40   10.60
   7   4  -1   45.80    6.90
   7   4  -1   52.29   10.20
  -7  -4   1   29.60    9.60
  -7  -4   1   33.50    8.50
  -7  -4   1   52.99   11.80
  -7  -4   1   67.29   11.80
   6   4  -1   53.79    9.00
   6   4  -1   41.50    6.10
   6   4  -1   48.10    9.80
  -6  -4   1   46.10    9.50
  -6  -4   1   65.69    8.50
  -6  -4   1   39.60    9.80
  -6  -4   1   64.59   11.30
  -6  -4   1   69.69   11.30
   5   4  -1   77.29   10.90
   5   4  -1   68.99    9.80
   5   4  -1   65.59    6.70
  -5  -4   1   74.89   11.20
  -5  -4   1   77.89    7.70
  -5  -4   1   55.89    8.90
  -5  -4   1   90.29   11.60
  -5  -4   1   84.39   10.80
   4   4  -1   35.70    7.70
   4   4  -1   30.90    4.50
   4   4  -1   35.20    5.70
  -4  -4   1   34.00    7.20
  -4  -4   1   31.50    4.90
  -4  -4   1   24.30    7.30
  -4  -4   1   16.80    7.10
  -4  -4   1   34.40    8.80
   3   4  -1  488.25   18.50
   3   4  -1  494.05   10.80
   3   4  -1  502.15   15.40
   3   4  -1  498.65   10.70
  -3  -4   1  481.25   20.20
  -3  -4   1  500.65   18.90
  -3  -4   1  491.35   17.70
  -3  -4   1  479.35   19.20
   2   4  -1 1352.86   29.20
   2   4  -1 1351.66   22.70
   2   4  -1 1313.17   31.50
  -2  -4   1 1326.37   22.60
  -2  -4   1 1323.07   31.70
  -2  -4   1 1298.17   33.10
  -2  -4   1 1354.06   29.70
  -2  -4   1 1351.36   31.50
  -2  -4   1 1319.27   31.40
   1   4  -1 3946.11   63.89
   1   4  -1 4080.49   69.99
   1   4  -1 3965.80   69.49
  -1  -4   1 4051.89   70.49
  -1  -4   1 3827.22   71.49
  -1  -4   1 3941.91   69.69
  -1  -4   1 4030.70   68.39
  -1  -4   1 3990.80   69.49
   0   4  -1    6.60    5.80
   0   4  -1   15.90    4.90
   0   4  -1   11.00    4.30
   0  -4   1    4.10    6.80
   0  -4   1   25.40    5.80
   0  -4   1   20.00    5.80
   0  -4   1    6.00    4.20
   0  -4   1   22.00    7.10
  -1   4  -1 1073.59   28.00
  -1   4  -1 1123.19   29.80
  -1   4  -1 1069.39   23.00
   1  -4   1 1064.69   26.20
   1  -4   1 1093.79   25.20
   1  -4   1 1049.59   27.70
   1  -4   1 1079.49   30.50
  -2   4  -1   75.49    9.30
  -2   4  -1   73.89    4.70
  -2   4  -1   78.99    4.60
  -2   4  -1   66.29    9.20
   2  -4   1   92.69   10.60
   2  -4   1   78.99    6.20
   2  -4   1   80.29    8.50
   2  -4   1   70.49    9.60
  -3   4  -1    3.40    6.10
  -3   4  -1    5.60    5.80
   3  -4   1   11.30    1.90
   3  -4   1   11.60    6.70
   3  -4   1    5.40    6.10
   3  -4   1   14.30    5.40
  -4   4  -1   -5.70    6.40
  -4   4  -1    3.30    7.30
   4  -4   1   -4.90    4.90
   4  -4   1   -7.00    6.50
   4  -4   1   -6.20    5.90
  -5   4  -1    4.20    7.90
  -5   4  -1   17.50    9.30
   5  -4   1    5.10    9.60
   5  -4   1    5.70    6.80
   5  -4   1    7.60    9.60
  -6   4  -1    4.40    8.40
  -6   4  -1   -2.20    9.10
   6  -4   1    0.50    8.70
   6  -4   1   18.80   10.60
  -7   4  -1    0.90   10.60
  -7   4  -1    1.40    9.20
   7  -4   1    0.00   11.40
   7  -4   1  -10.90    9.00
  10   3  -1   26.20   11.20
  10   3  -1    7.70   10.30
  10   3  -1   32.30   12.90
 -10  -3   1    8.60   11.30
 -10  -3   1   -1.10   11.40
   9   3  -1   -1.20    8.30
   9   3  -1   10.10    8.70
  -9  -3   1   -3.60    8.50
  -9  -3   1    5.30   10.30
   8   3  -1  251.27   18.10
   8   3  -1  247.88   20.20
   8   3  -1  280.87   21.80
  -8  -3   1  251.27   19.00
  -8  -3   1  280.17   18.20
  -8  -3   1  291.07   21.60
  -8  -3   1  224.48   22.90
   7   3  -1  621.84   28.50
   7   3  -1  645.84   28.00
   7   3  -1  661.53   25.30
  -7  -3   1  523.45   22.90
  -7  -3   1  642.74   28.40
  -7  -3   1  638.04   25.60
  -7  -3   1  679.03   22.00
  -7  -3   1  702.73   30.90
   6   3  -1  331.27   13.20
   6   3  -1  385.26   20.20
   6   3  -1  308.27   16.40
  -6  -3   1  297.87   18.10
  -6  -3   1  320.57   16.30
  -6  -3   1  331.67   20.40
  -6  -3   1  310.47   13.90
  -6  -3   1  340.07   17.40
   5   3  -1  119.49   11.50
   5   3  -1  106.29   12.10
   5   3  -1  117.69    8.00
  -5  -3   1   92.99   10.80
  -5  -3   1  112.69   11.80
  -5  -3   1  115.49   13.20
  -5  -3   1  125.29   10.10
  -5  -3   1   98.59   11.80
  -5  -3   1  109.69    9.00
   4   3  -1   25.00    7.00
   4   3  -1   28.60    5.00
   4   3  -1   21.50    6.00
  -4  -3   1   26.20    7.10
  -4  -3   1   11.70    5.90
  -4  -3   1   24.20    7.20
  -4  -3   1   19.40    7.30
  -4  -3   1   20.70    5.10
   3   3  -1 2250.67   38.40
   3   3  -1 2277.97   45.60
   3   3  -1 2236.28   40.50
  -3  -3   1 2278.67   38.60
  -3  -3   1 2200.58   46.60
  -3  -3   1 2203.58   45.10
  -3  -3   1 2287.17   46.30
  -3  -3   1 2259.87   43.80
  -3  -3   1 2222.88   45.50
   2   3  -1    3.10    3.00
   2   3  -1   -0.40    3.20
   2   3  -1    0.70    1.70
   2   3  -1    0.90    1.70
  -2  -3   1   -2.20    3.20
  -2  -3   1   -0.50    3.30
  -2  -3   1    3.40    3.60
  -2  -3   1   -1.80    3.20
  -2  -3   1    1.60    3.60
   1   3  -1 2634.64   46.50
   1   3  -1 2597.94   42.00
   1   3  -1 2600.24   47.20
  -1  -3   1 2662.43   47.60
  -1  -3   1 2623.24   45.30
  -1  -3   1 2652.33   47.20
  -1  -3   1 2588.34   47.10
  -1  -3   1 2588.34   49.10
  -1  -3   1 2589.94   42.10
   0   3  -1  303.67   10.00
   0   3  -1  283.97   11.60
   0  -3   1  250.77    9.60
   0  -3   1  288.17   11.70
   0  -3   1  297.77   11.20
   0  -3   1  265.57   10.50
   0  -3   1  291.07   10.90
  -1   3  -1  402.46   11.20
  -1   3  -1  395.66   14.60
  -1   3  -1  391.56   14.30
   1  -3   1  389.96   13.00
   1  -3   1  385.56   14.20
   1  -3   1  382.16   14.80
   1  -3   1  391.76   11.90
   1  -3   1  389.26   10.90
  -2   3  -1  449.36   17.80
  -2   3  -1  474.35   11.90
  -2   3  -1  476.45   18.10
  -2   3  -1  468.75   10.40
  -2   3  -1  464.75   10.40
   2  -3   1  472.05   10.50
   2  -3   1  472.65   18.90
   2  -3   1  460.85   15.80
   2  -3   1  494.55   18.50
   2  -3   1  484.05   11.90
  -3   3  -1   73.89    9.00
  -3   3  -1   79.29   10.00
   3  -3   1   86.69   10.40
   3  -3   1   81.09    8.30
   3  -3   1   82.19   10.00
  -4   3  -1  304.67   16.90
  -4   3  -1  286.57   18.00
   4  -3   1  276.87   14.20
   4  -3   1  293.57   16.70
   4  -3   1  278.97   16.50
  -5   3  -1  229.18   16.70
  -5   3  -1  219.88   20.30
   5  -3   1  227.28   17.20
   5  -3   1  223.78   14.30
   5  -3   1  200.38   16.40
  -6   3  -1   34.80   10.20
  -6   3  -1   43.70   12.10
   6  -3   1   51.99   12.40
   6  -3   1   28.20    9.00
   6  -3   1   28.60   11.20
  -7   3  -1    4.00    9.20
  -7   3  -1    0.20    8.90
   7  -3   1    3.70   10.20
   7  -3   1   11.20    9.80
  -8   3  -1    8.10   12.00
   8  -3   1   -1.80   10.10
   8  -3   1   -6.80   10.00
  10   2  -1   70.19   15.90
  10   2  -1   58.69   15.20
 -10  -2   1   35.40   13.20
 -10  -2   1   54.99   15.20
   9   2  -1   62.69   14.10
   9   2  -1   48.40   12.60
   9   2  -1   26.10   10.80
  -9  -2   1   47.50   13.50
  -9  -2   1   55.99   13.90
   8   2  -1  534.35   26.80
   8   2  -1  538.65   28.10
   8   2  -1  548.35   29.00
  -8  -2   1  494.35   28.60
  -8  -2   1  538.05   27.80
   7   2  -1   53.09   12.20
   7   2  -1   22.70    8.30
   7   2  -1   69.89    9.90
  -7  -2   1   53.29    9.10
  -7  -2   1   54.39   11.30
  -7  -2   1   49.70   10.90
  -7  -2   1   73.79   10.20
   6   2  -1  305.97   17.70
   6   2  -1  290.97   15.00
   6   2  -1  275.27   18.40
  -6  -2   1  265.97   17.20
  -6  -2   1  287.87   17.00
  -6  -2   1  311.77   15.30
  -6  -2   1  311.27   19.70
  -6  -2   1  280.87   14.90
   5   2  -1  335.97   14.90
   5   2  -1  306.07   16.60
   5   2  -1  337.67   17.60
  -5  -2   1  336.97   16.10
  -5  -2   1  362.56   17.90
  -5  -2   1  378.66   19.10
  -5  -2   1  341.87   14.40
   4   2  -1  756.32   24.30
   4   2  -1  762.72   22.20
  -4  -2   1  770.52   24.90
  -4  -2   1  761.02   23.70
  -4  -2   1  732.03   20.40
  -4  -2   1  746.83   22.60
  -4  -2   1  755.62   21.80
  -4  -2   1  772.42   24.00
   3   2  -1   95.29    8.10
   3   2  -1  103.09    6.20
  -3  -2   1   98.89    8.80
  -3  -2   1  102.79    7.80
  -3  -2   1   84.99    8.40
  -3  -2   1   91.09    6.70
  -3  -2   1   94.69    6.60
  -3  -2   1   98.09    7.90
  -3  -2   1   96.39    7.70
   2   2  -1  484.15   14.30
   2   2  -1  454.85   11.90
   2   2  -1  466.55   11.20
  -2  -2   1  476.55   13.10
  -2  -2   1  503.35   15.10
  -2  -2   1  429.16   14.30
  -2  -2   1  467.25   14.30
  -2  -2   1  459.75   14.10
  -2  -2   1  459.95   11.20
   1   2  -1  542.75   14.30
   1   2  -1  572.74   12.80
   1   2  -1  562.44   13.40
   1   2  -1  545.85   11.10
  -1  -2   1  568.94   14.30
  -1  -2   1  571.94   14.60
  -1  -2   1  558.14   11.10
  -1  -2   1  552.74   14.60
  -1  -2   1  564.84   13.00
  -1  -2   1  530.25   15.10
   0   2  -1 3455.85   56.59
   0   2  -1 3491.85   54.79
   0  -2   1 3413.36   55.29
   0  -2   1 3446.76   54.69
   0  -2   1 3366.46   56.39
   0  -2   1 3413.96   56.29
   0  -2   1 3408.06   56.49
  -1   2  -1  794.02   15.30
  -1   2  -1  765.42   16.10
  -1   2  -1  767.62   19.00
  -1   2  -1  779.12   19.00
   1  -2   1  810.32   19.40
   1  -2   1  770.12   18.30
   1  -2   1  786.52   15.50
   1  -2   1  823.62   16.30
   1  -2   1  786.62   18.00
  -2   2  -1 1549.64   24.70
  -2   2  -1 1544.75   25.20
  -2   2  -1 1506.05   33.60
  -2   2  -1 1537.95   24.80
  -2   2  -1 1527.75   32.70
   2  -2   1 1556.94   33.50
   2  -2   1 1543.65   24.60
   2  -2   1 1569.54   31.20
   2  -2   1 1528.25   25.20
   2  -2   1 1615.54   33.40
  -3   2  -1  473.75   18.80
  -3   2  -1  434.36   17.00
   3  -2   1  450.75   16.10
   3  -2   1  491.05   18.80
  -4   2  -1   89.49    9.90
  -4   2  -1  104.89   12.20
   4  -2   1   78.19    8.90
   4  -2   1   96.29   11.50
   4  -2   1  102.29   11.10
  -5   2  -1  455.55   20.10
  -5   2  -1  430.16   22.50
   5  -2   1  408.96   21.60
   5  -2   1  489.65   22.30
   5  -2   1  441.66   18.90
  -6   2  -1    5.10    7.20
  -6   2  -1   21.70    9.20
   6  -2   1    0.20    6.90
   6  -2   1   17.20    9.20
   6  -2   1   19.20    8.50
  -7   2  -1   45.20   13.30
  -7   2  -1   42.50   11.00
   7  -2   1   21.90   10.90
   7  -2   1   32.60   11.80
   7  -2   1   11.10    8.00
  -8   2  -1    6.90   11.50
   8  -2   1   29.30   12.50
   8  -2   1   16.70   11.90
   9   1  -1  128.79   16.80
   9   1  -1  178.18   21.40
   9   1  -1  134.19   18.70
  -9  -1   1  137.49   19.50
  -9  -1   1  145.09   20.60
   8   1  -1  -10.70    7.10
   8   1  -1    3.50    7.60
   8   1  -1   -0.20    8.60
  -8  -1   1    0.50    9.70
  -8  -1   1   -4.70    9.10
   7   1  -1  350.66   15.80
   7   1  -1  317.87   21.00
   7   1  -1  317.37   19.60
   7   1  -1  372.66   21.80
  -7  -1   1  362.46   19.50
  -7  -1   1  317.97   21.70
  -7  -1   1  368.16   22.70
   6   1  -1    1.80    5.50
   6   1  -1    5.10    6.50
   6   1  -1   -6.00    6.20
   6   1  -1   -1.20    4.10
  -6  -1   1   -0.50    6.60
  -6  -1   1   -2.20    6.40
  -6  -1   1    2.10    5.70
  -6  -1   1   -2.40    3.80
   5   1  -1   16.10    4.70
   5   1  -1   13.80    6.10
   5   1  -1   10.90    6.20
  -5  -1   1   19.80    6.80
  -5  -1   1   16.90    6.20
  -5  -1   1   13.90    5.50
  -5  -1   1   12.30    4.70
   4   1  -1  128.19   11.60
   4   1  -1  137.29   11.60
   4   1  -1  122.09    8.90
  -4  -1   1  123.19   10.90
  -4  -1   1  117.99    8.90
  -4  -1   1  122.69   10.20
  -4  -1   1  119.89   11.60
  -4  -1   1  132.09   11.90
   3   1  -1  179.98    9.90
   3   1  -1  192.48    8.80
  -3  -1   1  175.48    9.80
  -3  -1   1  202.38    9.00
  -3  -1   1  195.48   10.10
  -3  -1   1  198.98   10.60
  -3  -1   1  206.68    9.90
  -3  -1   1  210.58   11.50
  -2  -1   1 9431.26  147.99
  -2  -1   1 9630.24  147.19
  -2  -1   1 9308.37  147.89
  -2  -1   1 9937.81  148.19
  -2  -1   1 9999.00  147.09
  -2  -1   1 9835.72  147.09
  -2  -1   1 9627.04  148.99
   1   1  -1 3948.30   60.99
   1   1  -1 4107.79   62.59
   1   1  -1 3864.31   60.59
   1   1  -1 3916.01   61.59
   1   1  -1 3980.60   61.99
   1   1  -1 3970.90   60.89
   1   1  -1 3881.61   61.39
   1   1  -1 3946.11   62.39
  -1  -1   1 4014.60   63.69
  -1  -1   1 3879.51   60.99
  -1  -1   1 4005.20   62.09
  -1  -1   1 3954.00   62.59
  -1  -1   1 3815.42   61.59
  -1  -1   1 3927.21   60.99
  -1  -1   1 4085.39   62.89
   0   1  -1 5347.27   82.89
   0   1  -1 5618.74   83.69
   0   1  -1 5408.26   80.79
   0   1  -1 5498.75   82.39
   0   1  -1 5524.95   82.79
   0   1  -1 5625.54   82.29
   0   1  -1 5497.75   83.09
   0  -1   1 5295.87   82.89
   0  -1   1 5438.46   82.39
   0  -1   1 5494.85   83.49
   0  -1   1 5525.55   83.29
   0  -1   1 5414.76   80.79
   0  -1   1 5393.86   82.99
  -1   1  -1 2106.99   36.10
  -1   1  -1 2132.09   33.60
  -1   1  -1 2070.39   36.80
  -1   1  -1 2160.48   36.90
  -1   1  -1 2093.59   33.70
  -1   1  -1 2117.09   33.50
   1  -1   1 2094.69   36.80
   1  -1   1 2138.79   36.30
   1  -1   1 2157.88   33.50
   1  -1   1 2147.49   36.10
   1  -1   1 2140.89   33.80
  -2   1  -1   24.80    2.60
  -2   1  -1   28.70    4.90
  -2   1  -1   31.60    4.80
  -2   1  -1   21.70    4.00
   2  -1   1   24.70    2.50
   2  -1   1   25.70    4.80
   2  -1   1   27.00    4.80
   2  -1   1   25.10    4.10
  -3   1  -1 1438.56   25.20
  -3   1  -1 1421.26   30.40
  -3   1  -1 1417.26   33.40
  -3   1  -1 1433.66   33.20
   3  -1   1 1447.66   33.30
   3  -1   1 1413.46   33.10
   3  -1   1 1466.65   31.50
   3  -1   1 1428.76   25.00
  -4   1  -1  808.92   26.00
  -4   1  -1  795.92   22.60
  -4   1  -1  807.52   25.90
  -4   1  -1  798.22   16.80
   4  -1   1  793.52   25.70
   4  -1   1  788.22   16.70
   4  -1   1  811.42   23.60
   4  -1   1  767.02   25.20
  -5   1  -1   18.20    6.00
  -5   1  -1    9.80    6.30
  -5   1  -1   21.50    7.00
   5  -1   1   20.10    7.10
   5  -1   1   21.90    6.30
   5  -1   1   14.70    6.90
   5  -1   1   25.20    3.70
  -6   1  -1   -4.20    6.00
  -6   1  -1   -5.20    6.00
  -6   1  -1    0.80    5.90
   6  -1   1    0.80    6.00
   6  -1   1   -1.30    6.10
   6  -1   1   -7.60    5.50
  -7   1  -1    8.00    9.20
  -7   1  -1   -0.90    6.60
   7  -1   1   12.10    8.90
   7  -1   1   10.70    8.40
   7  -1   1   -3.10    7.10
  -8   1  -1  488.75   29.80
   8  -1   1  462.65   28.40
   8  -1   1  430.76   26.80
   8  -1   1  492.95   25.00
  -9   1  -1   24.60   12.70
   9  -1   1   18.70   10.80
   9  -1   1   29.20   12.60
   9   0  -1   69.69   16.10
   9   0  -1   38.20   12.50
  -9   0   1   52.39   15.30
   8   0  -1  -16.40    8.00
   8   0  -1   -4.20    9.00
   8   0  -1    8.80    8.20
  -8   0   1   -3.60    9.10
  -8   0   1    4.40   10.00
   7   0  -1    8.80    8.00
   7   0  -1  -12.10    7.30
   7   0  -1    4.00    6.80
  -7   0   1    3.50    8.60
  -7   0   1   -7.50    7.10
  -7   0   1   -2.90    7.20
   6   0  -1  180.78   10.30
   6   0  -1  165.28   13.20
   6   0  -1  182.28   17.30
   6   0  -1  163.08   16.20
   6   0  -1  184.28   10.00
  -6   0   1  197.08   18.70
  -6   0   1  158.58   16.30
  -6   0   1  172.98   15.20
   5   0  -1  336.27   12.40
   5   0  -1  371.66   18.20
   5   0  -1  342.27   17.90
   5   0  -1  358.26   16.20
   5   0  -1  345.57   12.90
  -5   0   1  335.97   18.60
  -5   0   1  354.66   18.50
  -5   0   1  340.17   16.60
   4   0  -1  226.88   13.90
   4   0  -1  243.88   14.30
   4   0  -1  233.18   10.30
   4   0  -1  227.88   12.50
   4   0  -1  215.08    9.50
  -4   0   1  239.28   15.10
  -4   0   1  213.98   12.80
  -4   0   1  219.38    9.50
  -4   0   1  207.38   13.80
   3   0  -1   12.60    5.50
   3   0  -1   12.80    4.30
   3   0  -1   14.90    3.90
   3   0  -1   18.30    3.60
   3   0  -1   15.00    4.80
  -3   0   1   11.00    4.80
  -3   0   1    7.40    4.90
  -3   0   1    2.70    5.10
  -3   0   1   13.10    3.40
  -3   0   1   15.00    3.70
   2   0  -1  259.37    8.60
   2   0  -1  234.28    9.70
   2   0  -1  252.97    7.70
   2   0  -1  213.18    9.30
   2   0  -1  244.18    8.90
   2   0  -1  228.38    9.00
  -2   0   1  243.28    8.30
  -2   0   1  249.38    7.80
  -2   0   1  249.48   10.60
  -2   0   1  254.57   10.60
  -2   0   1  250.27   10.00
   1   0  -1    4.60    2.30
   1   0  -1    1.30    1.90
   1   0  -1    5.70    2.70
   1   0  -1    2.30    2.00
   1   0  -1    2.80    1.90
   1   0  -1    2.30    2.50
   1   0  -1    1.70    2.40
   1   0  -1   -0.40    1.90
   1   0  -1    1.00    2.20
   1   0  -1    4.30    2.80
  -1   0   1    0.50    0.60
  -1   0   1    2.60    2.40
  -1   0   1    3.50    2.90
  -1   0   1    0.80    2.30
  -1   0   1    2.10    2.70
  -1   0   1    4.30    2.20
  -1   0   1    2.70    2.00
  -1   0  -1 2420.56   39.80
  -1   0  -1 2575.34   40.30
  -1   0  -1 2510.75   39.90
  -1   0  -1 2473.45   38.10
  -1   0  -1 2490.75   40.60
   1   0   1 2532.05   39.80
   1   0   1 2546.25   40.50
   1   0   1 2472.35   38.10
   1   0   1 2351.86   39.70
   1   0   1 2548.15   40.30
   1   0   1 2454.05   39.20
   1   0   1 2492.15   40.70
   1   0   1 2506.35   39.50
  -2   0  -1 2144.29   37.70
  -2   0  -1 2045.20   34.30
  -2   0  -1 2056.39   34.20
  -2   0  -1 2036.60   34.80
  -2   0  -1 2192.48   38.70
   2   0   1 2074.79   35.00
   2   0   1 2033.60   38.30
   2   0   1 2057.09   38.00
   2   0   1 2097.99   34.20
   2   0   1 2119.19   34.30
  -3   0  -1  198.98   10.60
  -3   0  -1  188.28    8.00
  -3   0  -1  195.68    9.90
  -3   0  -1  191.88    6.90
   3   0   1  171.98   10.10
   3   0   1  181.88    9.60
   3   0   1  203.58    7.80
   3   0   1  199.88    7.00
  -4   0  -1 4440.76   70.79
  -4   0  -1 4383.36   74.59
  -4   0  -1 4356.56   81.39
  -4   0  -1 4586.34   80.59
   4   0   1 4457.65   81.39
   4   0   1 4470.25   72.89
   4   0   1 4446.96   71.69
   4   0   1 4629.04   79.99
  -5   0  -1   77.69    5.70
  -5   0  -1   82.29    8.40
  -5   0  -1   73.29   10.20
  -5   0  -1   91.99   11.30
   5   0   1   96.89   10.70
   5   0   1   83.89    7.30
   5   0   1   73.09    9.80
  -6   0  -1  141.19   11.60
  -6   0  -1  136.29    7.00
  -6   0  -1  112.39   13.30
  -6   0  -1  118.09   14.00
   6   0   1  122.39   13.70
   6   0   1  126.29   14.00
   6   0   1  128.39    8.80
   6   0   1  122.49   12.70
  -7   0  -1  111.89   15.30
  -7   0  -1  138.79   16.70
  -7   0  -1  139.99   13.30
   7   0   1  126.89   16.20
   7   0   1  124.09   14.60
   7   0   1  127.89   15.70
  -8   0  -1   69.09   14.30
  -8   0  -1   85.19   14.80
   8   0   1   80.59   14.90
   8   0   1   92.79   14.30
   8   0   1   55.99   13.10
  -9   0  -1   52.49   14.50
   9   0   1   59.29   12.80
   9   0   1   48.40   14.60
   9   0   1   19.70   10.60
   9  -1  -1  128.49   18.80
   9  -1  -1  158.98   20.50
  -9   1   1  113.89   20.00
   8  -1  -1   73.39   14.90
   8  -1  -1   71.19   14.90
  -8   1   1   79.99   14.30
  -8   1   1   85.69   17.40
   7  -1  -1   81.09   14.20
   7  -1  -1   73.39   14.60
   7  -1  -1   57.79   10.40
  -7   1   1   70.29   14.30
  -7   1   1   81.79   13.30
   6  -1  -1  306.07   19.20
   6  -1  -1  268.57   19.80
   6  -1  -1  283.97   15.80
  -6   1   1  293.27   20.50
  -6   1   1  262.37   18.00
   5  -1  -1  196.78   14.40
   5  -1  -1  198.58   12.00
   5  -1  -1  210.18    8.00
   5  -1  -1  196.28    8.50
  -5   1   1  182.58   14.10
  -5   1   1  202.28   18.00
   4  -1  -1  159.88    9.80
   4  -1  -1  163.78   13.00
   4  -1  -1  153.28    7.30
   4  -1  -1  150.38   12.30
   4  -1  -1  146.29    6.50
   4  -1  -1  165.98    6.60
  -4   1   1  155.28   13.00
  -4   1   1  138.69   13.50
   3  -1  -1   53.69    8.10
   3  -1  -1   46.70    7.30
   3  -1  -1   49.20    4.10
   3  -1  -1   54.49    5.20
   3  -1  -1   57.29    4.20
   3  -1  -1   54.89    5.10
   3  -1  -1   53.79    6.40
  -3   1   1   55.79    8.30
  -3   1   1   54.59    8.80
   2  -1  -1 1011.60   19.40
   2  -1  -1  958.20   23.10
   2  -1  -1 1010.10   19.90
   2  -1  -1 1020.50   20.10
   2  -1  -1 1025.30   24.20
   2  -1  -1 1035.80   17.80
  -2   1   1  993.00   25.30
  -2   1   1 1024.60   20.60
  -2   1   1 1001.30   17.90
  -2   1   1 1007.00   19.70
  -2   1   1 1032.00   24.50
   1  -1  -1 3459.35   54.99
   1  -1  -1 3464.45   52.59
   1  -1  -1 3441.96   52.09
   1  -1  -1 3437.96   56.99
   1  -1  -1 3361.36   55.99
  -1   1   1 3460.55   52.49
  -1   1   1 3487.95   54.79
  -1   1   1 3466.45   58.39
  -1   1   1 3445.66   52.39
  -1   1   1 3554.64   56.39
  -1   1   1 3437.56   57.89
   0  -1  -1 4194.98   62.29
   0  -1  -1 4058.89   62.99
   0  -1  -1 3947.90   62.69
   0  -1  -1 3971.50   61.29
   0  -1  -1 3816.42   58.99
   0  -1  -1 4087.59   62.59
   0  -1  -1 4073.79   61.09
   0   1   1 3970.20   62.89
   0   1   1 3988.60   58.99
   0   1   1 3977.90   61.29
   0   1   1 3977.00   62.59
   0   1   1 4060.79   62.09
   0   1   1 3956.70   58.89
   0   1   1 4022.20   62.99
  -1  -1  -1 2416.86   39.60
  -1  -1  -1 2354.96   40.50
  -1  -1  -1 2399.06   39.00
  -1  -1  -1 2466.85   38.90
  -1  -1  -1 2419.66   36.70
  -1  -1  -1 2375.96   37.20
  -1  -1  -1 2454.85   39.70
   1   1   1 2345.57   39.60
   1   1   1 2471.55   38.80
   1   1   1 2380.86   40.50
   1   1   1 2423.16   39.00
   1   1   1 2379.66   36.70
   1   1   1 2326.47   37.10
   1   1   1 2385.16   39.70
  -2  -1  -1  300.17   10.40
  -2  -1  -1  298.67    8.70
  -2  -1  -1  279.57    9.50
  -2  -1  -1  277.17   10.50
   2   1   1  292.17    8.50
   2   1   1  296.77   11.10
   2   1   1  294.77    9.80
  -3  -1  -1  492.55   14.00
  -3  -1  -1  460.55   10.50
  -3  -1  -1  455.05   16.50
  -3  -1  -1  470.35   13.70
  -3  -1  -1  465.85   15.60
   3   1   1  466.75   16.10
   3   1   1  482.65   10.10
   3   1   1  459.05   13.50
   3   1   1  470.55   15.80
  -4  -1  -1  264.87   15.00
  -4  -1  -1  265.87   11.40
  -4  -1  -1  286.27   10.20
  -4  -1  -1  309.57   13.90
  -4  -1  -1  289.47   15.80
   4   1   1  283.77   15.00
   4   1   1  312.67   15.20
   4   1   1  271.87   11.70
  -5  -1  -1   -4.60    4.80
  -5  -1  -1    1.00    4.90
  -5  -1  -1    6.20    4.00
  -5  -1  -1    6.60    4.10
   5   1   1    5.00    5.40
   5   1   1    3.70    5.20
   5   1   1    8.80    4.40
  -6  -1  -1  137.19   13.30
  -6  -1  -1  168.78   10.50
  -6  -1  -1  153.08    9.30
  -6  -1  -1  142.49   14.50
   6   1   1  145.69   10.10
   6   1   1  166.48   15.10
   6   1   1  152.88   15.00
  -7  -1  -1    8.40    5.90
  -7  -1  -1   -2.90    5.80
  -7  -1  -1    1.30    6.70
   7   1   1    1.90    7.10
   7   1   1    1.50    7.90
   7   1   1   -0.90    5.00
  -8  -1  -1  279.77   21.80
  -8  -1  -1  280.37   21.00
   8   1   1  276.67   20.20
   8   1   1  270.37   24.60
   8   1   1  246.88   23.10
  -9  -1  -1   54.39   13.50
  -9  -1  -1   67.99   14.80
   9   1   1   49.20   13.50
   9   1   1   83.89   15.00
   9   1   1   43.70   12.90
 -10  -1  -1   25.60   12.50
 -10  -1  -1   10.10   10.80
  10   1   1    9.30    9.60
  10   1   1   25.60   13.20
  10   1   1    8.30   10.00
   8  -2  -1   18.60   12.00
   8  -2  -1   20.50   10.60
  -8   2   1   29.10   11.40
  -8   2   1    1.40   12.00
   7  -2  -1   -3.80    9.00
   7  -2  -1   -1.60    9.10
  -7   2   1    7.70   10.70
  -7   2   1   -9.20    7.70
   6  -2  -1  899.11   33.60
   6  -2  -1  850.21   27.70
   6  -2  -1  851.21   33.40
  -6   2   1  862.81   32.50
  -6   2   1  899.71   36.80
   5  -2  -1  347.67   19.90
   5  -2  -1  371.86   20.10
   5  -2  -1  359.66   15.50
  -5   2   1  395.96   22.90
  -5   2   1  351.56   20.00
   4  -2  -1  500.85   20.30
   4  -2  -1  482.65   15.90
   4  -2  -1  486.25   20.80
   4  -2  -1  475.75   11.00
   4  -2  -1  452.05   11.00
  -4   2   1  449.16   19.80
  -4   2   1  470.35   22.50
   3  -2  -1   12.80    3.20
   3  -2  -1    8.60    6.10
   3  -2  -1    7.50    2.80
   3  -2  -1   12.40    4.10
   3  -2  -1   18.20    6.10
  -3   2   1    7.80    6.10
  -3   2   1   13.00    6.60
   2  -2  -1  762.12   16.40
   2  -2  -1  799.12   22.60
   2  -2  -1  775.82   17.20
   2  -2  -1  767.42   21.40
  -2   2   1  783.12   23.60
  -2   2   1  812.02   23.20
  -2   2   1  793.42   17.30
  -2   2   1  819.02   17.40
   1  -2  -1    7.10    1.80
   1  -2  -1    8.20    3.50
   1  -2  -1    6.50    1.80
   1  -2  -1    3.20    3.40
   1  -2  -1    5.40    2.80
  -1   2   1    6.20    1.90
  -1   2   1    7.00    4.00
  -1   2   1    4.10    1.70
  -1   2   1    8.60    3.70
   0  -2  -1  919.01   20.20
   0  -2  -1  904.61   20.00
   0  -2  -1  888.21   16.10
   0  -2  -1  903.61   17.90
   0   2   1  923.01   19.70
   0   2   1  893.91   20.20
   0   2   1  904.31   15.80
   0   2   1  874.11   17.80
  -1  -2  -1  528.05   10.90
  -1  -2  -1  529.95   13.10
  -1  -2  -1  536.85   15.30
  -1  -2  -1  532.05   11.20
  -1  -2  -1  536.05   13.40
  -1  -2  -1  534.55   14.10
   1   2   1  535.65   11.20
   1   2   1  535.95   13.90
   1   2   1  524.75   12.50
   1   2   1  532.35   13.40
   1   2   1  529.25   13.40
  -2  -2  -1  768.22   14.40
  -2  -2  -1  768.42   19.90
  -2  -2  -1  769.22   18.70
  -2  -2  -1  804.52   14.20
  -2  -2  -1  798.22   19.30
   2   2   1  815.12   14.60
   2   2   1  794.92   14.40
   2   2   1  815.42   20.10
   2   2   1  773.72   18.90
  -3  -2  -1   56.89    6.80
  -3  -2  -1   56.09    6.50
  -3  -2  -1   63.49    4.80
  -3  -2  -1   65.19    7.30
   3   2   1   57.39    2.80
   3   2   1   64.49    7.30
   3   2   1   64.09    6.70
   3   2   1   56.39    2.50
  -4  -2  -1  301.07   16.00
  -4  -2  -1  297.07   15.00
  -4  -2  -1  288.87    8.20
  -4  -2  -1  293.17   12.00
  -4  -2  -1  310.27   13.70
   4   2   1  305.67   15.90
   4   2   1  303.77    8.10
   4   2   1  310.47   13.50
  -5  -2  -1  188.98    8.40
  -5  -2  -1  209.78   14.90
  -5  -2  -1  206.68   14.60
  -5  -2  -1  199.88   12.00
   5   2   1  223.08   14.70
   5   2   1  211.68   12.10
   5   2   1  225.18   15.00
  -6  -2  -1   99.29   11.20
  -6  -2  -1  108.09   13.00
  -6  -2  -1   97.29   12.70
  -6  -2  -1  122.59    7.90
  -6  -2  -1  121.29    9.90
   6   2   1  122.39   13.20
   6   2   1  110.09   10.60
   6   2   1   96.29   12.30
  -7  -2  -1  181.28   16.40
  -7  -2  -1  215.68   19.50
  -7  -2  -1  190.78   12.70
  -7  -2  -1  200.78   11.10
   7   2   1  196.68   18.90
   7   2   1  186.88   12.80
   7   2   1  194.58   18.00
  -8  -2  -1   82.99   13.00
  -8  -2  -1   97.09   15.40
   8   2   1  120.09   16.10
   8   2   1  105.09   12.00
   8   2   1   92.99   15.00
  -9  -2  -1   32.80   11.80
  -9  -2  -1   26.40   11.10
   9   2   1   35.90   12.80
   9   2   1   50.09   12.80
 -10  -2  -1   21.70   13.10
 -10  -2  -1    9.80   10.30
  10   2   1    2.10    8.40
  10   2   1    7.30    9.90
  10   2   1   21.00   11.70
   8  -3  -1  -18.50    8.70
   8  -3  -1   -2.40   10.10
  -8   3   1   -0.60   10.40
  -8   3   1    9.90   11.40
   7  -3  -1   55.69   13.80
   7  -3  -1   81.09   14.70
  -7   3   1   79.29   16.50
  -7   3   1   76.89   15.00
   6  -3  -1   30.50   10.30
   6  -3  -1   48.10   12.50
  -6   3   1   46.40   11.70
  -6   3   1   29.20   11.60
   5  -3  -1  163.38   17.00
   5  -3  -1  154.78   16.40
  -5   3   1  117.29   14.50
  -5   3   1  147.59   17.30
   4  -3  -1  131.09   14.00
   4  -3  -1  170.38   15.40
   4  -3  -1  146.59    9.40
  -4   3   1  130.59   14.80
  -4   3   1  131.49   13.80
   3  -3  -1 1357.46   27.80
   3  -3  -1 1377.56   26.50
   3  -3  -1 1434.36   37.20
   3  -3  -1 1341.97   35.80
  -3   3   1 1500.75   39.70
  -3   3   1 1410.76   37.80
   2  -3  -1  104.09   11.40
   2  -3  -1   82.49   10.00
   2  -3  -1   71.49    6.30
   2  -3  -1   76.29    5.80
  -2   3   1   63.49    9.10
  -2   3   1   68.89    9.60
   1  -3  -1  371.46    9.80
   1  -3  -1  391.96   13.20
   1  -3  -1  389.76   14.90
   1  -3  -1  384.56   16.00
   1  -3  -1  380.36   10.10
  -1   3   1  384.06   15.80
  -1   3   1  384.16   10.10
  -1   3   1  395.86   16.00
  -1   3   1  383.96    9.90
   0  -3  -1  212.48    7.50
   0  -3  -1  223.28   10.30
   0  -3  -1  229.08   11.00
   0  -3  -1  227.08   11.10
   0   3   1  218.48    8.30
   0   3   1  215.08    7.20
   0   3   1  212.58    9.60
   0   3   1  215.58   10.40
  -1  -3  -1   56.39    6.50
  -1  -3  -1   45.80    5.40
  -1  -3  -1   54.39    6.60
  -1  -3  -1   50.49    5.00
  -1  -3  -1   52.99    4.10
   1   3   1   61.89    4.60
   1   3   1   51.59    5.30
   1   3   1   57.99    5.90
  -2  -3  -1    4.80    4.20
  -2  -3  -1   13.00    1.80
  -2  -3  -1   17.60    4.10
  -2  -3  -1   11.00    4.30
  -2  -3  -1   10.60    4.00
  -2  -3  -1   15.30    1.90
   2   3   1   16.50    3.20
   2   3   1   12.40    3.70
   2   3   1   15.00    4.00
  -3  -3  -1   40.60    6.20
  -3  -3  -1   36.20    3.30
  -3  -3  -1   29.40    5.60
  -3  -3  -1   32.40    6.50
  -3  -3  -1   30.80    3.00
  -3  -3  -1   40.20    6.90
   3   3   1   34.70    3.30
   3   3   1   34.80    6.60
   3   3   1   30.70    6.20
   3   3   1   34.90    3.50
  -4  -3  -1   35.50    5.00
  -4  -3  -1   26.40    7.50
  -4  -3  -1   37.20    7.60
  -4  -3  -1   22.00    7.30
   4   3   1   39.60    7.60
   4   3   1   18.50    6.00
   4   3   1   34.40    3.70
   4   3   1   28.30    3.20
  -5  -3  -1    2.80    4.20
  -5  -3  -1    9.90    6.10
  -5  -3  -1    2.50    5.20
  -5  -3  -1    2.60    6.40
   5   3   1    4.90    6.30
   5   3   1    6.20    2.40
   5   3   1    6.70    2.50
   5   3   1    8.00    5.50
  -6  -3  -1   45.00    9.60
  -6  -3  -1   39.90    6.90
  -6  -3  -1   43.50    8.00
  -6  -3  -1   44.30    9.10
   6   3   1   48.20    4.30
   6   3   1   34.00    8.30
   6   3   1   39.20    7.80
  -7  -3  -1    2.10    5.70
  -7  -3  -1   -2.80    6.70
  -7  -3  -1   16.30    8.30
  -7  -3  -1    0.40    2.00
   7   3   1    4.30    6.00
   7   3   1    8.60    7.20
   7   3   1   19.20    8.50
   7   3   1    8.70    5.00
  -8  -3  -1  298.77   23.10
  -8  -3  -1  320.37   18.10
  -8  -3  -1  332.57   23.30
  -8  -3  -1  335.57   20.00
   8   3   1  316.97   18.40
   8   3   1  292.07   22.10
   8   3   1  333.17   22.80
  -9  -3  -1   40.90   11.20
  -9  -3  -1   41.20   13.50
   9   3   1   60.59   14.10
   9   3   1   52.89   10.30
   9   3   1   52.89   13.00
 -10  -3  -1   -6.40    9.40
 -10  -3  -1   -2.90    8.80
  10   3   1    5.50    8.70
  10   3   1   -7.30    8.60
   7  -4  -1  143.49   19.30
   7  -4  -1  183.48   23.60
  -7   4   1  169.38   20.60
  -7   4   1  179.78   23.80
   6  -4  -1   39.10   12.70
   6  -4  -1   57.19   13.90
  -6   4   1   30.00   11.10
  -6   4   1   41.90   14.00
   5  -4  -1    5.40    9.10
   5  -4  -1    7.40   10.00
  -5   4   1    2.00    8.20
  -5   4   1    4.20    9.60
   4  -4  -1  110.19   15.00
   4  -4  -1  102.09   14.00
  -4   4   1   90.89   13.10
  -4   4   1   75.59   13.90
   3  -4  -1   97.89    7.60
   3  -4  -1  107.99   12.10
   3  -4  -1  104.59   12.50
   3  -4  -1   87.89    6.30
  -3   4   1   97.59   12.80
  -3   4   1   84.69   12.00
   2  -4  -1  872.71   19.40
   2  -4  -1  846.32   21.50
   2  -4  -1  873.31   27.10
   2  -4  -1  853.81   27.40
  -2   4   1  851.01   15.00
  -2   4   1  880.81   28.80
  -2   4   1  825.02   14.80
  -2   4   1  830.72   27.90
   1  -4  -1  210.78    8.80
   1  -4  -1  231.48   15.70
   1  -4  -1  232.48   14.70
   1  -4  -1  222.78   11.20
  -1   4   1  231.48    8.80
  -1   4   1  234.58   14.70
  -1   4   1  198.18   13.40
   0  -4  -1  318.17   11.10
   0  -4  -1  318.67   15.90
   0  -4  -1  302.67   13.80
   0  -4  -1  322.67   15.40
   0   4   1  298.57   13.40
   0   4   1  334.07   15.60
   0   4   1  304.87   11.60
  -1  -4  -1  187.28   11.50
  -1  -4  -1  173.18    9.40
  -1  -4  -1  188.48   12.10
  -1  -4  -1  189.68   13.10
   1   4   1  196.78   10.70
   1   4   1  198.18    8.90
   1   4   1  202.98   10.20
  -2  -4  -1 1137.19   27.70
  -2  -4  -1 1144.59   27.40
  -2  -4  -1 1116.39   20.00
  -2  -4  -1 1181.08   31.00
  -2  -4  -1 1105.59   19.80
  -2  -4  -1 1121.89   27.50
   2   4   1 1110.99   27.70
   2   4   1 1166.18   25.60
   2   4   1 1121.89   20.20
  -3  -4  -1   19.60    7.70
  -3  -4  -1   15.50    6.60
  -3  -4  -1    8.20    6.00
  -3  -4  -1   14.40    6.50
   3   4   1   13.40    6.30
   3   4   1   12.10    4.00
   3   4   1   22.90    7.00
  -4  -4  -1   48.30    8.60
  -4  -4  -1   48.90    4.20
  -4  -4  -1   42.50    8.90
  -4  -4  -1   40.40    8.70
  -4  -4  -1   40.20    8.50
   4   4   1   50.29    4.80
   4   4   1   57.59    9.90
   4   4   1   38.20    4.60
   4   4   1   47.70    8.50
  -5  -4  -1  136.69   14.00
  -5  -4  -1  118.99    7.40
  -5  -4  -1  116.49   11.90
  -5  -4  -1  132.49   13.60
   5   4   1  145.49   14.60
   5   4   1  103.89    5.50
   5   4   1  139.39   13.10
  -6  -4  -1   37.80    9.30
  -6  -4  -1   50.89    9.70
  -6  -4  -1   35.10    6.20
  -6  -4  -1   38.00    8.70
   6   4   1   52.79   10.30
   6   4   1   49.00    4.00
   6   4   1   45.40    8.30
  -7  -4  -1   30.60    9.60
  -7  -4  -1   36.20    7.60
  -7  -4  -1   36.50   11.50
  -7  -4  -1   57.79   10.40
   7   4   1   46.40   10.70
   7   4   1   48.20   10.10
  -8  -4  -1  126.29   13.60
  -8  -4  -1   82.79   14.20
  -8  -4  -1  118.49   17.40
  -8  -4  -1   90.39   12.90
   8   4   1   95.39   15.20
   8   4   1  112.19   14.40
   8   4   1   71.09   13.10
  -9  -4  -1  166.28   22.00
  -9  -4  -1  196.38   21.00
  -9  -4  -1  202.68   18.80
   9   4   1  182.48   20.90
   9   4   1  199.18   18.60
   9   4   1  191.58   21.70
 -10  -4  -1    0.00   10.40
  10   4   1   13.00   10.70
  10   4   1   25.70   11.80
   6  -5  -1  104.79   16.90
   6  -5  -1  153.68   21.30
  -6   5   1  157.48   20.50
  -6   5   1  145.39   21.80
   5  -5  -1  451.35   27.10
   5  -5  -1  457.15   28.40
  -5   5   1  521.85   28.10
  -5   5   1  465.65   29.40
   4  -5  -1  328.47   22.50
   4  -5  -1  332.97   23.90
  -4   5   1  343.97   23.70
  -4   5   1  312.97   21.70
   3  -5  -1  166.18   16.90
   3  -5  -1  183.08   17.50
  -3   5   1  158.88   16.60
  -3   5   1  150.98   15.90
   2  -5  -1  247.58   10.20
   2  -5  -1  228.68   16.60
   2  -5  -1  248.48   12.00
   2  -5  -1  247.78   17.20
  -2   5   1  249.38   16.90
  -2   5   1  256.37   16.40
  -2   5   1  225.58    7.50
   1  -5  -1  241.18   15.70
   1  -5  -1  266.17   13.40
   1  -5  -1  264.27   16.20
   1  -5  -1  256.07   10.40
  -1   5   1  257.57   15.20
  -1   5   1  251.17    9.90
  -1   5   1  254.97   16.00
   0  -5  -1   22.70    8.10
   0  -5  -1   16.90    6.30
   0  -5  -1   25.60    8.00
   0  -5  -1   24.10    5.10
   0   5   1   27.10    6.90
   0   5   1   22.10    4.80
   0   5   1   22.20    6.00
  -1  -5  -1 1494.65   37.70
  -1  -5  -1 1487.65   36.40
  -1  -5  -1 1519.75   32.90
  -1  -5  -1 1535.35   36.50
   1   5   1 1511.25   34.10
   1   5   1 1480.95   31.90
   1   5   1 1494.25   36.00
  -2  -5  -1  356.06   17.70
  -2  -5  -1  359.56   18.70
  -2  -5  -1  365.06   17.00
  -2  -5  -1  345.27   10.50
  -2  -5  -1  357.66   15.60
   2   5   1  321.27   14.80
   2   5   1  377.16   16.00
   2   5   1  351.66   10.70
  -3  -5  -1  333.37   17.50
  -3  -5  -1  331.07   16.70
  -3  -5  -1  328.17   16.60
  -3  -5  -1  366.36   19.00
   3   5   1  333.67   16.20
   3   5   1  352.56   13.70
  -4  -5  -1   18.50    7.10
  -4  -5  -1   19.40    7.10
  -4  -5  -1    9.90    7.50
  -4  -5  -1   15.60    6.70
   4   5   1   14.40    4.20
   4   5   1   13.10    6.40
   4   5   1   23.20    7.00
  -5  -5  -1  297.47   18.40
  -5  -5  -1  302.07    8.90
  -5  -5  -1  314.97   18.10
  -5  -5  -1  303.37   16.30
  -5  -5  -1  314.37   17.40
   5   5   1  302.87   10.60
   5   5   1  285.27   17.40
   5   5   1  292.77   16.70
   5   5   1  291.17    8.70
  -6  -5  -1   16.70    7.60
  -6  -5  -1   28.10    5.10
  -6  -5  -1   24.10    8.50
  -6  -5  -1   22.00    7.50
   6   5   1   30.40    8.30
   6   5   1   31.80    4.00
   6   5   1   39.40    9.60
  -7  -5  -1   49.70    7.50
  -7  -5  -1   39.50   10.50
  -7  -5  -1   44.80   11.80
  -7  -5  -1   36.00    9.60
   7   5   1   30.00    9.10
   7   5   1   43.50    9.60
  -8  -5  -1   -1.00    7.30
  -8  -5  -1   -2.50    5.50
  -8  -5  -1    1.40    9.70
  -8  -5  -1   -1.00    7.80
   8   5   1   -1.70    7.70
   8   5   1   -4.30    7.00
  -9  -5  -1   -4.10    9.20
  -9  -5  -1    1.40    7.90
  -9  -5  -1    2.30    9.60
   9   5   1    5.10    9.50
   9   5   1    1.50    8.20
   9   5   1   16.40    9.40
 -10  -5  -1   54.09   15.80
 -10  -5  -1   45.00   14.00
  10   5   1   67.69   16.60
  10   5   1   47.70   11.60
  10   5   1   34.60   13.20
   5  -6  -1   -8.20   11.10
   5  -6  -1   -2.50   12.40
  -5   6   1   15.00   11.00
  -5   6   1   16.80   11.20
   4  -6  -1   70.89   16.40
   4  -6  -1   57.79   15.20
  -4   6   1   65.29   14.90
  -4   6   1   39.90   12.60
   3  -6  -1  205.48   21.20
   3  -6  -1  239.98   22.50
  -3   6   1  225.88   20.80
  -3   6   1  224.68   20.80
   2  -6  -1  221.18   20.30
   2  -6  -1  183.78   12.50
   2  -6  -1  185.58   18.60
  -2   6   1  177.18   17.40
  -2   6   1  179.68   18.20
   1  -6  -1   71.89   12.20
   1  -6  -1   57.19   11.20
   1  -6  -1   80.79    7.70
   1  -6  -1   93.19   10.50
  -1   6   1   60.79    6.50
  -1   6   1   80.19   11.60
  -1   6   1   74.89   11.70
   0  -6  -1    9.50    5.40
   0  -6  -1    3.30    3.90
   0  -6  -1    0.50    7.90
   0  -6  -1   12.40    8.30
   0   6   1    1.80    4.70
   0   6   1   13.00    6.60
   0   6   1   -0.20    3.80
  -1  -6  -1 1905.21   40.80
  -1  -6  -1 1947.21   46.70
  -1  -6  -1 1888.71   45.10
  -1  -6  -1 1868.91   44.50
   1   6   1 1933.01   40.70
   1   6   1 1952.80   42.20
   1   6   1 1951.80   45.60
  -2  -6  -1   48.80    9.10
  -2  -6  -1   56.39   10.10
  -2  -6  -1   51.79    8.10
  -2  -6  -1   38.70    9.30
   2   6   1   50.39    8.50
   2   6   1   54.99    5.90
   2   6   1   41.90    7.70
  -3  -6  -1  111.69   12.30
  -3  -6  -1  146.59   13.80
  -3  -6  -1  130.49    4.20
  -3  -6  -1  113.19   11.70
  -3  -6  -1  162.28   15.50
   3   6   1  142.99   11.50
   3   6   1  124.69    9.90
  -4  -6  -1  282.07   17.90
  -4  -6  -1  266.37   16.30
  -4  -6  -1  301.47   16.70
  -4  -6  -1  275.27   16.20
   4   6   1  284.87   12.90
   4   6   1  276.57   16.80
   4   6   1  244.68   16.00
  -5  -6  -1   23.90    8.20
  -5  -6  -1   17.00    7.80
  -5  -6  -1   20.80    8.60
  -5  -6  -1   18.80    7.20
   5   6   1   27.40    7.60
   5   6   1   23.30    8.20
   5   6   1   19.10    4.70
  -6  -6  -1  125.99   14.90
  -6  -6  -1  211.98   16.50
   6   6   1  144.99    8.40
   6   6   1  132.89   15.10
   6   6   1  134.89   15.90
  -7  -6  -1   73.49   13.30
  -7  -6  -1   66.09   12.30
  -7  -6  -1   59.39   12.50
   7   6   1   62.69   13.10
   7   6   1   64.49   11.50
  -8  -6  -1   -7.20    8.50
  -8  -6  -1    2.50   10.40
  -8  -6  -1    1.50    8.80
   8   6   1   -1.80    8.10
   8   6   1    7.40    8.40
  -9  -6  -1   60.19   15.10
  -9  -6  -1   48.30   13.00
  -9  -6  -1   44.80   12.60
   9   6   1   75.69   16.30
   9   6   1   49.10   12.50
 -10  -6  -1   92.39   15.40
 -10  -6  -1   82.59   18.00
 -10  -6  -1   84.99   16.60
  10   6   1   91.59   17.70
  10   6   1  104.19   18.90
  10   6   1  119.19   17.70
   5  -7  -1  169.28   23.80
   5  -7  -1  135.39   21.70
  -5   7   1  150.78   22.00
  -5   7   1  163.48   23.30
   4  -7  -1  137.39   20.90
   4  -7  -1  177.48   22.90
  -4   7   1  178.98   22.30
  -4   7   1  178.18   21.40
   3  -7  -1  252.67   25.20
   3  -7  -1  195.38   21.70
  -3   7   1  201.48   22.00
  -3   7   1  214.38   21.80
   2  -7  -1   39.20   14.20
   2  -7  -1   34.90   13.90
  -2   7   1   39.70   11.00
  -2   7   1   54.39   13.30
   1  -7  -1  114.39   12.80
   1  -7  -1  101.29   14.50
   1  -7  -1   86.49   14.60
  -1   7   1   97.59   13.20
  -1   7   1   89.89   13.70
   0  -7  -1   18.50   10.10
   0  -7  -1   27.20   10.90
   0  -7  -1   17.80    7.00
   0  -7  -1   19.70    6.30
   0   7   1   25.10    6.30
   0   7   1   26.80    7.60
   0   7   1   31.60    8.90
  -1  -7  -1   -2.80    7.00
  -1  -7  -1    5.80    8.40
  -1  -7  -1   -1.90    4.60
  -1  -7  -1    2.40    6.00
   1   7   1    3.20    4.80
   1   7   1    3.90    4.90
   1   7   1   -5.10    4.90
  -2  -7  -1  346.77   19.90
  -2  -7  -1  316.47   19.40
  -2  -7  -1  312.37   18.10
  -2  -7  -1  315.57   16.30
   2   7   1  315.37   16.60
   2   7   1  325.57   17.10
   2   7   1  306.77   12.60
  -3  -7  -1   38.40    9.10
  -3  -7  -1   67.89    4.60
  -3  -7  -1   77.59   10.70
  -3  -7  -1   60.19   11.10
  -3  -7  -1   88.09   13.70
   3   7   1   65.79    9.70
   3   7   1   58.89    9.80
  -4  -7  -1    4.40    6.90
  -4  -7  -1    1.50    6.70
  -4  -7  -1   -4.80    6.00
  -4  -7  -1   -0.90    5.10
   4   7   1   -6.50    3.90
   4   7   1    7.80    5.70
  -5  -7  -1  736.93   29.20
  -5  -7  -1  744.53   28.70
  -5  -7  -1  761.12   32.20
   5   7   1  752.12   29.40
   5   7   1  719.63   22.20
   5   7   1  751.42   30.20
  -6  -7  -1  242.58   17.80
  -6  -7  -1  236.68   19.80
  -6  -7  -1  209.08   19.40
  -6  -7  -1  239.58   18.50
   6   7   1  233.58   11.80
   6   7   1  222.78   17.10
   6   7   1  253.77   19.20
  -7  -7  -1   43.20   11.10
  -7  -7  -1   23.40   10.10
  -7  -7  -1   27.60    9.90
   7   7   1   31.60    9.60
   7   7   1   35.50   10.70
  -8  -7  -1    2.10    9.00
  -8  -7  -1   -8.60    8.30
  -8  -7  -1   -0.60    9.50
   8   7   1   -6.60    8.50
   8   7   1   12.20   10.20
  -9  -7  -1   10.30   11.10
  -9  -7  -1    6.80   10.20
  -9  -7  -1   -0.90    8.90
   9   7   1  -10.20    8.10
   9   7   1   -7.60    8.70
 -10  -7  -1   -2.20   10.10
 -10  -7  -1    4.30    9.50
 -10  -7  -1   25.00   13.10
  10   7   1    4.70   10.60
  10   7   1   -4.50    9.40
   4  -8  -1  -14.40   15.00
   4  -8  -1  -25.00   14.00
  -4   8   1   12.30   12.60
  -4   8   1   -5.70    9.70
   3  -8  -1   63.39   18.00
   3  -8  -1   17.80   14.30
  -3   8   1   43.60   12.20
  -3   8   1   47.70   14.70
   2  -8  -1   59.19   14.60
   2  -8  -1   45.40   15.10
  -2   8   1   57.69   13.00
  -2   8   1   81.69   15.70
   1  -8  -1   43.50   15.40
   1  -8  -1  118.69   18.10
  -1   8   1   72.59   13.10
  -1   8   1   79.19   14.30
   0  -8  -1   19.00   12.00
   0  -8  -1   16.90    8.50
   0  -8  -1   16.70   11.20
   0   8   1   22.90    9.40
   0   8   1   17.80    8.20
  -1  -8  -1  149.19   13.60
  -1  -8  -1  165.98   18.60
  -1  -8  -1  199.58   19.10
  -1  -8  -1  180.18   18.20
   1   8   1  161.28   17.00
   1   8   1  149.59   13.60
   1   8   1  146.29   13.30
  -2  -8  -1  630.14   28.30
  -2  -8  -1  595.54   28.20
  -2  -8  -1  610.14   23.90
  -2  -8  -1  616.54   27.60
   2   8   1  619.14   24.50
   2   8   1  622.84   26.20
   2   8   1  636.94   20.30
  -3  -8  -1   61.39   10.60
  -3  -8  -1   68.89   13.10
  -3  -8  -1   57.39   12.00
  -3  -8  -1   56.29   11.90
   3   8   1   57.69   10.50
   3   8   1   61.19   10.70
  -4  -8  -1   50.69   10.60
  -4  -8  -1   36.90   11.40
  -4  -8  -1   40.60   11.70
  -4  -8  -1   30.00   11.20
   4   8   1   51.09   10.90
   4   8   1   41.90    9.00
  -5  -8  -1   25.90   11.20
  -5  -8  -1   21.20    9.10
  -5  -8  -1   21.20   10.20
  -5  -8  -1   16.70   10.00
   5   8   1   34.10    7.60
   5   8   1   13.10    8.00
   5   8   1   18.60    8.70
  -6  -8  -1   61.19   12.60
  -6  -8  -1   58.09   12.90
  -6  -8  -1   66.29   12.50
  -6  -8  -1   71.29   13.90
   6   8   1   46.60   12.20
   6   8   1   60.89   12.30
   6   8   1   66.59    9.00
  -7  -8  -1   -6.30    7.90
  -7  -8  -1   -0.60    7.60
  -7  -8  -1    3.50    8.40
   7   8   1   -0.80    7.60
   7   8   1    3.40    7.90
  -8  -8  -1  290.27   24.40
  -8  -8  -1  281.07   26.20
  -8  -8  -1  271.77   21.60
   8   8   1  282.77   22.80
   8   8   1  219.78   22.80
  -9  -8  -1  171.08   21.70
  -9  -8  -1  185.78   22.00
  -9  -8  -1  185.38   22.60
   9   8   1  188.08   23.40
   9   8   1  169.28   20.70
 -10  -8  -1  225.48   24.80
 -10  -8  -1  242.28   26.10
 -10  -8  -1  222.78   25.30
  10   8   1  257.37   28.40
  10   8   1  211.18   23.30
   2  -9  -1   21.00   14.60
   2  -9  -1   11.10   13.50
  -2   9   1    6.60   10.00
  -2   9   1   19.10   11.10
   1  -9  -1    9.70   14.40
   1  -9  -1   23.00   12.90
  -1   9   1    6.50    8.60
  -1   9   1   13.50    9.90
   0  -9  -1  109.79   19.90
   0  -9  -1   76.29   15.70
   0  -9  -1   83.09   14.90
   0   9   1   76.99   12.30
   0   9   1   98.09   16.20
  -1  -9  -1   -3.10   11.80
  -1  -9  -1    2.00    8.30
  -1  -9  -1   12.50   11.20
   1   9   1    6.00    6.20
   1   9   1   12.20    9.00
  -2  -9  -1  153.28   18.60
  -2  -9  -1  189.78   21.00
  -2  -9  -1  138.99   18.50
  -2  -9  -1  158.18   15.10
   2   9   1  155.68   17.40
   2   9   1  165.98   16.30
  -3  -9  -1   17.30    8.50
  -3  -9  -1   11.30   10.10
  -3  -9  -1    5.40    9.20
  -3  -9  -1    2.20    9.70
   3   9   1   11.50    8.00
   3   9   1   -5.70    6.60
  -4  -9  -1   44.10   11.70
  -4  -9  -1   62.89   14.10
  -4  -9  -1   53.69   11.50
  -4  -9  -1   60.69   14.10
   4   9   1   60.69   11.10
   4   9   1   60.29   12.40
  -5  -9  -1  515.05   27.30
  -5  -9  -1  476.05   28.40
  -5  -9  -1  436.86   25.10
  -5  -9  -1  472.25   26.00
   5   9   1  520.45   23.10
   5   9   1  516.45   27.40
   5   9   1  472.85   26.00
  -6  -9  -1   -7.60    7.80
  -6  -9  -1    7.20    9.00
  -6  -9  -1   -0.70    8.00
  -6  -9  -1   -1.40    8.50
   6   9   1  -11.80    7.50
   6   9   1   -1.30    7.90
   6   9   1   -3.60    5.60
  -7  -9  -1   18.80   10.60
  -7  -9  -1   39.50   12.30
  -7  -9  -1   28.10   12.00
  -7  -9  -1   22.40   11.80
   7   9   1   23.50   11.90
   7   9   1   18.30    9.80
  -8  -9  -1  197.98   21.30
  -8  -9  -1  155.38   21.10
  -8  -9  -1  155.08   20.00
   8   9   1  127.99   18.80
   8   9   1  148.29   19.60
  -9  -9  -1  107.19   19.20
  -9  -9  -1  148.19   21.60
  -9  -9  -1  117.89   18.00
   9   9   1  107.39   19.80
   9   9   1  103.39   17.30
 -10  -9  -1  246.88   28.20
 -10  -9  -1  196.98   25.00
 -10  -9  -1  241.68   27.60
  10   9   1  230.78   28.00
  10   9   1  211.98   24.70
   1 -10  -1  -13.30   12.40
   1 -10  -1    3.90   11.90
  -1  10   1  -10.10    9.00
   0 -10  -1   45.50   13.60
   0 -10  -1   22.10   13.30
   0  10   1   51.69   14.50
  -1 -10  -1   30.50   13.30
  -1 -10  -1   32.20   15.00
  -1 -10  -1   19.30   10.60
   1  10   1   10.60    9.30
  -2 -10  -1  121.99   19.00
  -2 -10  -1   82.29   17.00
  -2 -10  -1   73.69   14.50
   2  10   1   90.19   13.50
   2  10   1  100.99   15.40
  -3 -10  -1   48.70   13.80
  -3 -10  -1   34.90   12.50
  -3 -10  -1   39.80   10.50
  -3 -10  -1   60.29   13.60
   3  10   1   32.50   10.70
   3  10   1   34.40   11.50
  -4 -10  -1  -11.90    9.10
  -4 -10  -1    5.70   10.10
  -4 -10  -1   16.00   12.20
  -4 -10  -1    4.00    8.40
   4  10   1   -2.80    7.90
   4  10   1    9.30    8.30
  -5 -10  -1   77.29   14.60
  -5 -10  -1   82.19   17.40
  -5 -10  -1   51.99   12.40
  -5 -10  -1   32.50   12.00
   5  10   1   36.20   12.20
   5  10   1   74.09   14.20
   5  10   1   61.39   11.50
  -6 -10  -1  120.29   18.00
  -6 -10  -1   69.39   15.80
  -6 -10  -1  116.29   17.80
  -6 -10  -1  143.29   18.70
   6  10   1  121.69   17.90
   6  10   1   98.19   16.80
   6  10   1  125.49   14.20
  -7 -10  -1   17.10   10.90
  -7 -10  -1    9.50   11.60
  -7 -10  -1   19.20   12.20
  -7 -10  -1   17.20   11.80
   7  10   1   35.80   13.00
   7  10   1   20.50   11.20
  -8 -10  -1   -7.90    8.20
  -8 -10  -1    9.10    9.80
  -8 -10  -1    9.40    9.70
   8  10   1   10.20   10.20
   8  10   1   -3.40    9.50
  -9 -10  -1   12.00   10.30
  -9 -10  -1    3.20   10.80
  -9 -10  -1    5.40   11.10
   9  10   1   -1.00    9.10
   9  10   1   -1.90    9.30
  -1 -11  -1    9.40   14.40
  -1 -11  -1   40.00   14.90
   1  11   1   12.70   10.90
  -2 -11  -1   25.80   13.00
  -2 -11  -1   43.00   13.60
  -2 -11  -1   48.70   14.80
   2  11   1   34.20   11.90
  -3 -11  -1   49.40   14.10
  -3 -11  -1   39.40   14.20
  -3 -11  -1   74.19   16.00
   3  11   1   60.59   12.80
   3  11   1   66.29   14.10
  -4 -11  -1  137.19   18.50
  -4 -11  -1  135.39   17.20
  -4 -11  -1  130.89   21.20
  -4 -11  -1  108.19   17.50
   4  11   1  131.99   17.20
   4  11   1  141.19   17.30
   4  11   1   90.99   14.70
  -5 -11  -1   46.90   13.20
  -5 -11  -1   30.80   12.00
  -5 -11  -1   52.99   15.10
  -5 -11  -1   44.20   12.50
   5  11   1   38.50   10.60
   5  11   1   45.50   13.30
   5  11   1   46.20   12.70
  -6 -11  -1    3.20    8.80
  -6 -11  -1   14.40   11.40
  -6 -11  -1   14.00   12.10
  -6 -11  -1   14.30    9.90
   6  11   1    0.60    8.50
   6  11   1   -0.30    9.30
  -7 -11  -1   28.50   12.70
  -7 -11  -1   19.20   11.50
  -7 -11  -1   33.70   14.70
  -7 -11  -1   22.10   12.70
   7  11   1    4.20   10.10
   7  11   1   30.70   13.20
  -8 -11  -1  128.89   20.70
  -8 -11  -1  126.79   19.60
  -8 -11  -1  115.89   22.50
   8  11   1   72.79   17.00
   8  11   1  101.79   18.70
  -3 -12  -1   11.20   11.90
  -3 -12  -1   15.50   12.10
  -3 -12  -1   40.90   15.40
   3  12   1   17.20   10.00
  -4 -12  -1   20.90   13.60
  -4 -12  -1   32.60   13.10
  -4 -12  -1   -3.60   12.20
   4  12   1   -0.60    9.60
   4  12   1   19.20   11.30
  -5 -12  -1   48.80   15.00
  -5 -12  -1   38.20   14.50
  -5 -12  -1   58.19   14.10
  -5 -12  -1   51.89   14.30
   5  12   1   48.30   12.70
   5  12   1   64.59   14.30
   5  12   1   23.30   11.80
  -6 -12  -1   35.10   13.00
  -6 -12  -1   32.60   14.10
  -6 -12  -1   46.20   14.10
  -6 -12  -1   50.89   14.20
   6  12   1   23.90   12.60
   6  12   1   32.00   12.20
  -7 -12  -1   11.70   11.40
  -7 -12  -1   -4.20   11.30
  -7 -12  -1   13.00   11.10
  -7 -12  -1   15.30   12.10
   7  12   1    9.30   10.50
   7  12   1    1.00   10.50
   6  12  -2    8.50    8.60
   6  12  -2   -1.60    9.90
  -6 -12   2    7.50   12.20
  -6 -12   2   23.80   13.70
  -6 -12   2   25.30   11.70
  -6 -12   2    5.30   12.10
   5  12  -2    3.70   10.10
   5  12  -2   15.70    9.80
  -5 -12   2   15.40   11.30
  -5 -12   2    0.60    9.80
  -5 -12   2   25.20   11.40
  -5 -12   2   20.60    9.80
   4  12  -2   65.49   14.50
  -4 -12   2   93.19   17.90
  -4 -12   2   75.19   16.50
  -4 -12   2  103.39   17.50
   3  12  -2    0.70    9.30
  -3 -12   2    5.10   11.30
  -3 -12   2    8.00   11.60
  -3 -12   2    6.60   10.20
  -3 -12   2   -9.90   10.50
   8  11  -2   55.79   15.30
   8  11  -2   43.20   14.40
  -8 -11   2   69.09   18.90
  -8 -11   2   41.70   14.50
  -8 -11   2   93.79   17.00
  -8 -11   2   50.79   15.20
   7  11  -2   11.40   10.80
  -7 -11   2  -19.60    7.40
  -7 -11   2    9.00    9.40
  -7 -11   2   22.50   13.20
  -7 -11   2   -6.40   11.20
   6  11  -2    2.80   10.40
   6  11  -2    7.80    8.70
  -6 -11   2    6.80    9.90
  -6 -11   2    4.70    9.90
  -6 -11   2  -11.30    9.80
  -6 -11   2   14.80   10.20
   5  11  -2   70.39   14.20
   5  11  -2   82.09   14.30
  -5 -11   2   86.19   16.90
  -5 -11   2   61.29   14.00
  -5 -11   2   79.79   16.80
  -5 -11   2  103.49   16.00
   4  11  -2    3.70    8.90
   4  11  -2   14.30    9.20
  -4 -11   2   -7.30    8.40
  -4 -11   2    0.50   10.80
  -4 -11   2   15.00   11.30
  -4 -11   2   -1.10    9.80
   3  11  -2   84.79   15.20
   3  11  -2   93.49   15.20
  -3 -11   2   97.19   16.10
  -3 -11   2   35.20   11.10
  -3 -11   2   71.19   15.30
  -3 -11   2   96.29   18.70
   2  11  -2   32.80   12.00
  -2 -11   2   37.20   13.10
  -2 -11   2   45.60   14.10
  -2 -11   2   41.40   13.30
  -2 -11   2   24.30   11.10
   1  11  -2   79.09   16.10
  -1 -11   2  137.59   20.80
  -1 -11   2  110.19   18.40
   0  11  -2   22.00   11.30
   0 -11   2   30.00   15.50
   0 -11   2   64.19   16.50
   9  10  -2   12.90   12.40
   9  10  -2    8.80   11.90
  -9 -10   2   22.00   14.20
  -9 -10   2   17.20   12.80
  -9 -10   2    1.10   11.00
  -9 -10   2   42.80   13.60
   8  10  -2    3.40   10.40
   8  10  -2   17.50   10.70
  -8 -10   2   -5.70   10.10
  -8 -10   2    0.90   11.30
  -8 -10   2   12.90    9.20
  -8 -10   2   -9.70   10.60
   7  10  -2   42.60   13.80
  -7 -10   2   55.39   16.20
  -7 -10   2   56.19   12.60
  -7 -10   2   59.19   17.30
  -7 -10   2   49.99   14.80
   6  10  -2  216.78   18.50
   6  10  -2  159.78   19.80
  -6 -10   2  228.48   25.00
  -6 -10   2  184.68   18.90
  -6 -10   2  158.48   20.10
  -6 -10   2  176.68   23.40
   5  10  -2   16.80    9.60
   5  10  -2    9.90    8.00
  -5 -10   2   23.10   11.50
  -5 -10   2    3.20    9.70
  -5 -10   2   14.80   11.40
  -5 -10   2   24.40    9.60
   4  10  -2  195.58   18.80
   4  10  -2  197.98   21.00
  -4 -10   2  227.88   23.00
  -4 -10   2  168.48   20.70
  -4 -10   2  164.28   20.50
  -4 -10   2  204.88   20.10
   3  10  -2   35.70   10.10
   3  10  -2   23.50   10.00
  -3 -10   2   46.90   12.90
  -3 -10   2   40.60   11.50
  -3 -10   2   36.40   12.40
  -3 -10   2   22.30   11.50
   2  10  -2  152.18   17.10
   2  10  -2  172.98   19.60
  -2 -10   2  201.18   20.50
  -2 -10   2  165.48   20.00
  -2 -10   2  149.19   18.80
  -2 -10   2  161.08   18.60
   1  10  -2   26.50   11.30
  -1 -10   2   49.60   13.00
  -1 -10   2   19.00   12.90
  -1 -10   2   17.90   10.90
  -1 -10   2    8.00    9.40
   0  10  -2    3.70    9.80
   0 -10   2   36.20   14.30
   0 -10   2   12.60   11.60
  -1  10  -2   -3.90    8.30
   1 -10   2   -4.20   11.80
   1 -10   2    7.00   13.50
   9   9  -2  191.98   23.90
   9   9  -2  198.58   24.00
  -9  -9   2  192.68   24.50
  -9  -9   2  211.88   23.80
  -9  -9   2  218.38   25.80
  -9  -9   2  236.08   27.60
   8   9  -2    9.70   10.80
   8   9  -2   -8.00    7.50
  -8  -9   2    6.00    9.40
  -8  -9   2    2.20    9.70
  -8  -9   2   -7.70   10.00
  -8  -9   2   15.10   10.40
   7   9  -2   22.30   10.70
  -7  -9   2   16.10   12.10
  -7  -9   2    9.20   10.20
  -7  -9   2    7.40    9.80
  -7  -9   2    2.90   10.90
   6   9  -2   60.49   13.00
   6   9  -2   71.19   11.50
  -6  -9   2   76.19   13.20
  -6  -9   2   59.89   14.40
  -6  -9   2   90.39   16.10
  -6  -9   2   75.59   16.10
   5   9  -2  333.37   19.30
   5   9  -2  283.07   20.50
  -5  -9   2  308.67   28.20
  -5  -9   2  261.37   21.00
  -5  -9   2  258.67   19.60
  -5  -9   2  285.57   22.90
   4   9  -2   53.49   11.90
   4   9  -2   47.50   10.70
  -4  -9   2   36.60   11.70
  -4  -9   2   33.30   13.40
  -4  -9   2   26.90   10.90
  -4  -9   2   46.90   12.30
   3   9  -2  584.54   26.90
   3   9  -2  618.54   27.00
  -3  -9   2  570.94   26.70
  -3  -9   2  609.74   29.40
  -3  -9   2  567.24   28.80
   2   9  -2   98.09   14.00
   2   9  -2   83.29   12.30
  -2  -9   2  120.09   16.70
  -2  -9   2  109.69   15.20
  -2  -9   2  113.79   16.40
  -2  -9   2  132.89   16.30
   1   9  -2    2.90    7.70
   1   9  -2   15.60    8.20
  -1  -9   2   23.10   11.40
  -1  -9   2   33.90   11.30
  -1  -9   2   12.50    9.00
  -1  -9   2   22.70   10.10
   0   9  -2  330.77   23.80
   0   9  -2  323.07   19.20
   0  -9   2  305.47   25.10
   0  -9   2  304.47   20.50
   0  -9   2  359.46   21.10
   0  -9   2  305.27   23.50
  -1   9  -2  411.56   26.30
  -1   9  -2  487.75   25.00
   1  -9   2  452.75   26.50
   1  -9   2  438.26   29.50
  -2   9  -2    3.80    9.20
  -2   9  -2    1.20    9.30
   2  -9   2   -2.40   12.20
   2  -9   2   -7.30   12.90
  -3   9  -2   18.10   10.40
  -3   9  -2    3.40   11.00
   3  -9   2    1.90   14.60
   3  -9   2  -36.50   11.90
  10   8  -2   15.70   11.80
  10   8  -2    4.60   12.30
 -10  -8   2   22.50   13.10
 -10  -8   2   10.30   11.70
 -10  -8   2   13.80   12.60
   9   8  -2  341.17   32.20
   9   8  -2  341.37   26.20
  -9  -8   2  365.86   29.10
  -9  -8   2  300.27   29.90
  -9  -8   2  341.17   25.80
  -9  -8   2  272.47   28.10
   8   8  -2   66.29   14.80
   8   8  -2   86.89   16.20
  -8  -8   2   96.49   15.70
  -8  -8   2  113.79   18.10
  -8  -8   2   94.59   16.80
  -8  -8   2  102.69   18.80
   7   8  -2  164.48   14.20
   7   8  -2  167.08   21.10
   7   8  -2  156.58   19.30
  -7  -8   2  205.88   23.60
  -7  -8   2  188.78   22.10
  -7  -8   2  147.79   18.60
  -7  -8   2  146.39   17.80
   6   8  -2   88.99   11.20
   6   8  -2   89.09   13.90
  -6  -8   2   96.79   15.90
  -6  -8   2   73.49   13.10
  -6  -8   2   86.19   16.60
  -6  -8   2   99.79   16.30
   5   8  -2   16.70    7.30
   5   8  -2   15.60    8.50
  -5  -8   2   11.80    9.00
  -5  -8   2    7.70    9.20
  -5  -8   2   29.70    9.60
  -5  -8   2   20.70   10.80
   4   8  -2   88.09   12.90
   4   8  -2   92.29   11.80
  -4  -8   2  114.29   16.90
  -4  -8   2   75.09   13.20
  -4  -8   2   86.19   13.40
  -4  -8   2  101.49   13.30
   3   8  -2  323.57   19.00
   3   8  -2  338.97   19.40
  -3  -8   2  300.07   20.50
  -3  -8   2  338.57   21.80
  -3  -8   2  340.47   19.70
  -3  -8   2  323.47   20.90
   2   8  -2   25.40    7.60
   2   8  -2   20.20    5.30
   2   8  -2   18.20    8.30
  -2  -8   2   14.40    9.30
  -2  -8   2   23.80   10.80
  -2  -8   2   25.20    9.30
  -2  -8   2   19.20    9.90
   1   8  -2  366.56   18.50
   1   8  -2  359.86   21.40
   1   8  -2  370.66   16.70
  -1  -8   2  373.06   21.70
  -1  -8   2  355.66   23.10
  -1  -8   2  390.56   21.10
  -1  -8   2  320.47   21.10
   0   8  -2  212.98   15.30
   0   8  -2  241.68   14.60
   0   8  -2  215.38   19.80
   0  -8   2  252.67   17.40
   0  -8   2  211.28   19.00
   0  -8   2  216.38   17.30
   0  -8   2  211.68   19.70
  -1   8  -2  403.66   25.30
  -1   8  -2  408.96   22.30
   1  -8   2  399.46   25.80
   1  -8   2  431.46   22.40
   1  -8   2  422.36   25.60
  -2   8  -2  179.98   20.30
  -2   8  -2  167.48   18.20
   2  -8   2  178.18   20.70
   2  -8   2  140.79   18.00
  -3   8  -2  123.89   17.80
  -3   8  -2  129.89   18.60
   3  -8   2   95.49   18.20
   3  -8   2  111.89   19.50
  -4   8  -2   70.69   15.60
  -4   8  -2   98.89   17.70
   4  -8   2   78.59   18.80
   4  -8   2   59.49   16.80
  10   7  -2   26.10   13.00
  10   7  -2   12.40    9.20
 -10  -7   2   16.40   12.30
 -10  -7   2    9.60   11.30
 -10  -7   2   12.40   11.70
   9   7  -2    7.90    9.50
   9   7  -2   13.50   10.40
  -9  -7   2    9.00   10.20
  -9  -7   2    0.20   11.10
  -9  -7   2   10.10   11.60
   8   7  -2  250.57   23.40
   8   7  -2  252.37   25.20
  -8  -7   2  231.28   24.50
  -8  -7   2  268.37   25.90
  -8  -7   2  247.88   25.10
  -8  -7   2  232.68   21.90
   7   7  -2   11.10    8.70
   7   7  -2    8.10    8.40
   7   7  -2    3.60    5.50
  -7  -7   2   -3.10    7.60
  -7  -7   2    3.80    8.90
  -7  -7   2   10.80    8.60
  -7  -7   2   -1.70    8.20
   6   7  -2   24.10    8.90
   6   7  -2   39.00    8.10
  -6  -7   2   36.90   11.30
  -6  -7   2   51.19   10.70
  -6  -7   2   39.50   11.30
  -6  -7   2   47.10   11.60
   5   7  -2  159.08   13.40
   5   7  -2  154.88   16.50
  -5  -7   2  179.18   18.80
  -5  -7   2  166.38   15.30
  -5  -7   2  177.48   17.70
  -5  -7   2  186.38   18.30
   4   7  -2  461.45   19.60
   4   7  -2  491.95   23.40
  -4  -7   2  466.45   24.90
  -4  -7   2  477.25   23.40
  -4  -7   2  432.86   22.70
  -4  -7   2  437.46   20.30
   3   7  -2   11.60    6.00
   3   7  -2    8.20    2.80
   3   7  -2   14.80    6.90
  -3  -7   2    7.10    7.00
  -3  -7   2   10.00    7.30
  -3  -7   2    5.70    6.70
  -3  -7   2   -3.00    6.50
   2   7  -2   79.59   10.30
   2   7  -2   60.29    9.80
   2   7  -2   72.29    6.80
  -2  -7   2   67.99   11.20
  -2  -7   2   76.59   12.30
  -2  -7   2   88.39   11.50
  -2  -7   2   77.09   10.60
   1   7  -2   61.99    9.20
   1   7  -2   70.59   10.70
   1   7  -2   54.99    7.60
  -1  -7   2   57.49   10.60
  -1  -7   2   61.59   10.30
  -1  -7   2   58.29   10.50
  -1  -7   2   66.89   11.30
   0   7  -2   21.70    6.10
   0   7  -2   21.20    7.80
   0   7  -2   22.10    6.70
   0  -7   2   44.90   11.00
   0  -7   2    2.10    8.70
   0  -7   2   25.60    8.60
   0  -7   2   15.70    7.40
  -1   7  -2  129.39   13.80
  -1   7  -2  128.59   15.30
  -1   7  -2  146.49   10.40
   1  -7   2  116.69   15.00
   1  -7   2  135.09   17.20
   1  -7   2  131.09   13.70
   1  -7   2  141.09   13.50
  -2   7  -2   18.50    8.40
  -2   7  -2   16.40    9.50
   2  -7   2  -11.70   10.20
   2  -7   2    1.70   12.50
   2  -7   2   -5.10    7.20
  -3   7  -2   96.29   15.10
  -3   7  -2   88.69   14.90
   3  -7   2   95.49   18.90
   3  -7   2   93.79   15.70
  -4   7  -2  -13.10    7.20
  -4   7  -2   -1.90    8.00
   4  -7   2  -29.60   10.70
   4  -7   2  -11.90    9.30
  -5   7  -2   27.00   12.10
  -5   7  -2   41.70   14.20
   5  -7   2   16.70   16.80
   5  -7   2   12.30   14.70
  10   6  -2  118.89   18.70
  10   6  -2  118.69   19.10
  10   6  -2  102.79   19.00
 -10  -6   2  108.59   26.00
 -10  -6   2  138.99   22.60
 -10  -6   2  115.49   18.60
   9   6  -2   13.20    9.40
   9   6  -2    8.10   10.20
  -9  -6   2    0.80   10.90
  -9  -6   2   -0.60    9.70
  -9  -6   2    9.30   10.10
   8   6  -2   32.20   11.50
   8   6  -2   26.00   11.00
  -8  -6   2   28.40   11.10
  -8  -6   2   24.30   10.80
  -8  -6   2   18.80   10.40
  -8  -6   2   40.30   12.50
   7   6  -2   37.40    7.80
   7   6  -2   24.40    8.80
   7   6  -2   25.10    9.80
  -7  -6   2   22.40    8.80
  -7  -6   2   32.10   11.00
  -7  -6   2   24.00   10.40
  -7  -6   2   50.69   13.10
   6   6  -2   92.49   12.90
   6   6  -2   93.39    8.70
   6   6  -2  103.89   10.50
  -6  -6   2  109.29   15.50
  -6  -6   2  105.69   13.00
  -6  -6   2  109.29   15.70
  -6  -6   2   92.59   13.50
   5   6  -2  119.19   10.70
   5   6  -2  120.69    7.00
   5   6  -2  101.49   12.60
  -5  -6   2  110.99   14.00
  -5  -6   2  124.49   14.40
  -5  -6   2  134.69   13.30
  -5  -6   2  149.29   17.00
   4   6  -2   40.50    8.90
   4   6  -2   57.39    4.50
   4   6  -2   40.60    7.30
   4   6  -2   53.19    4.30
  -4  -6   2   58.79   11.10
  -4  -6   2   53.59    9.70
  -4  -6   2   57.69    9.00
  -4  -6   2   41.40    9.70
   3   6  -2  204.38   14.40
   3   6  -2  197.38   12.90
   3   6  -2  213.98    7.40
  -3  -6   2  208.88   14.80
  -3  -6   2  234.28   15.50
  -3  -6   2  252.27   10.30
  -3  -6   2  198.68   15.10
  -3  -6   2  225.38   13.60
  -3  -6   2  231.38   15.90
   2   6  -2  406.76   18.60
   2   6  -2  416.96   18.10
   2   6  -2  401.36   12.50
  -2  -6   2  403.76   17.30
  -2  -6   2  425.86   20.00
  -2  -6   2  392.56   19.20
  -2  -6   2  435.06   19.30
  -2  -6   2  409.36   19.80
   1   6  -2   10.30    5.00
   1   6  -2   -0.30    3.40
   1   6  -2    4.20    5.20
  -1  -6   2    5.50    5.70
  -1  -6   2   -0.40    5.90
  -1  -6   2    3.10    5.70
  -1  -6   2   13.50    5.50
  -1  -6   2    6.50    6.60
   0   6  -2   82.49    9.20
   0   6  -2   91.09    9.30
   0   6  -2   84.19   10.80
   0  -6   2   59.59    9.10
   0  -6   2   87.19   11.00
   0  -6   2  108.19   12.60
   0  -6   2   92.59   10.70
   0  -6   2  100.59   10.00
  -1   6  -2   15.60    5.00
  -1   6  -2   18.20    7.40
  -1   6  -2   31.90    7.50
   1  -6   2   20.40    7.30
   1  -6   2   -0.20    7.60
   1  -6   2   19.80    6.40
   1  -6   2   13.30    8.70
  -2   6  -2   87.39   12.70
  -2   6  -2   95.99   12.90
   2  -6   2   98.19    9.40
   2  -6   2   95.09   15.00
   2  -6   2   94.19   13.20
   2  -6   2   72.89   10.40
  -3   6  -2  184.28   17.80
  -3   6  -2  202.18   18.80
   3  -6   2  231.18   16.50
   3  -6   2  182.58   20.90
   3  -6   2  231.98   20.20
  -4   6  -2  404.26   25.30
  -4   6  -2  388.96   24.70
   4  -6   2  360.56   25.10
   4  -6   2  348.77   24.70
  -5   6  -2    5.80    8.70
  -5   6  -2    0.20    8.30
   5  -6   2   13.80   11.20
   5  -6   2   12.00   12.20
  -6   6  -2   10.30   10.90
  -6   6  -2  -12.70    8.80
   6  -6   2    4.50   11.50
   6  -6   2  -10.60   12.10
  10   5  -2   -1.10   10.30
  10   5  -2    0.80    9.60
 -10  -5   2   -3.80    8.90
 -10  -5   2    6.00   11.80
   9   5  -2   -6.60    7.90
   9   5  -2  -12.50    8.20
   9   5  -2   -8.60    8.20
  -9  -5   2   -8.80    8.40
  -9  -5   2    5.40    8.30
  -9  -5   2  -14.80    9.60
   8   5  -2    0.90    8.20
   8   5  -2    0.80    7.20
  -8  -5   2   -6.30    7.50
  -8  -5   2    0.70    8.60
  -8  -5   2   -4.80    7.20
  -8  -5   2    6.70    9.10
   7   5  -2   68.39   11.30
   7   5  -2   77.79   14.20
   7   5  -2   71.49    9.00
  -7  -5   2   64.49    9.90
  -7  -5   2   66.79   13.10
  -7  -5   2   75.19   14.20
  -7  -5   2   47.90   11.60
  -7  -5   2   47.70   11.60
   6   5  -2    6.90    4.60
   6   5  -2    7.60    5.40
   6   5  -2   16.80    7.80
   6   5  -2   27.60    8.70
  -6  -5   2   15.50    7.40
  -6  -5   2   12.20    8.20
  -6  -5   2   13.10    6.80
  -6  -5   2   17.40    6.40
  -6  -5   2    7.90    8.10
   5   5  -2   35.20    5.10
   5   5  -2   35.40    8.30
   5   5  -2   49.99    7.20
  -5  -5   2   22.90    7.60
  -5  -5   2   46.80    9.80
  -5  -5   2   50.29   10.00
  -5  -5   2   32.80    7.90
   4   5  -2  193.98    8.30
   4   5  -2  171.78   10.90
   4   5  -2  192.78   13.60
  -4  -5   2  195.58   14.60
  -4  -5   2  206.98   14.20
  -4  -5   2  181.78   12.60
  -4  -5   2  201.68   15.50
  -4  -5   2  226.68   15.20
   3   5  -2  666.73   17.20
   3   5  -2  671.73   23.50
   3   5  -2  641.44   15.00
   3   5  -2  625.44   20.40
  -3  -5   2  627.84   20.50
  -3  -5   2  609.14   22.70
  -3  -5   2  678.43   24.80
  -3  -5   2  649.34   24.80
  -3  -5   2  643.04   22.60
   2   5  -2 1165.78   29.80
   2   5  -2 1138.09   23.30
   2   5  -2 1209.58   31.80
  -2  -5   2 1196.08   32.20
  -2  -5   2 1158.78   28.80
  -2  -5   2 1141.79   33.10
  -2  -5   2 1198.48   32.70
  -2  -5   2 1208.78   32.00
   1   5  -2 1886.11   41.50
   1   5  -2 1807.22   35.50
   1   5  -2 1840.82   40.80
  -1  -5   2 1842.02   43.10
  -1  -5   2 1892.61   41.10
  -1  -5   2 1788.22   41.30
  -1  -5   2 1826.62   41.70
  -1  -5   2 1881.81   39.30
   0   5  -2    4.40    4.30
   0   5  -2    5.10    5.20
   0   5  -2   10.60    4.80
   0  -5   2    2.40    5.80
   0  -5   2    7.80    4.90
   0  -5   2   10.80    7.10
   0  -5   2    8.50    7.40
   0  -5   2    5.10    5.10
  -1   5  -2  231.78   10.60
  -1   5  -2  203.98   12.60
  -1   5  -2  223.38   14.50
   1  -5   2  217.78   13.10
   1  -5   2  219.08   12.00
   1  -5   2  212.98   10.60
   1  -5   2  234.98   13.60
   1  -5   2  184.98   15.00
  -2   5  -2  107.59   12.00
  -2   5  -2  115.59    7.20
  -2   5  -2   84.39   10.90
   2  -5   2  118.69   13.80
   2  -5   2  117.99   11.50
   2  -5   2   98.59   11.90
   2  -5   2   97.99    7.30
   2  -5   2   96.59    8.00
  -3   5  -2  441.76   22.40
  -3   5  -2  451.05   22.30
   3  -5   2  425.46   21.90
   3  -5   2  415.86   19.00
   3  -5   2  417.96   23.20
  -4   5  -2  321.67   20.90
  -4   5  -2  340.77   21.30
   4  -5   2  343.27   21.10
   4  -5   2  331.47   22.50
   4  -5   2  333.27   18.50
  -5   5  -2   47.00   11.30
  -5   5  -2   21.60    9.80
   5  -5   2   13.90    9.20
   5  -5   2   42.00   12.90
   5  -5   2   16.40   11.20
  -6   5  -2  154.28   19.60
  -6   5  -2  163.78   19.10
   6  -5   2  165.68   20.40
   6  -5   2  137.39   19.20
  -7   5  -2  132.09   19.00
  -7   5  -2  132.39   20.80
   7  -5   2   94.59   18.70
   7  -5   2   97.49   17.80
  10   4  -2    1.80    9.40
  10   4  -2   15.10    9.60
  10   4  -2   13.60   10.80
 -10  -4   2   24.80   12.10
   9   4  -2   29.80   10.80
   9   4  -2   38.00   12.10
   9   4  -2   46.30   11.30
  -9  -4   2   46.50   13.50
  -9  -4   2   25.60   11.70
  -9  -4   2   54.49   12.90
   8   4  -2   -0.50    8.40
   8   4  -2   -2.00    7.10
   8   4  -2    3.80    7.90
  -8  -4   2   -3.60    8.30
  -8  -4   2   -5.00    7.30
  -8  -4   2    4.40    7.90
  -8  -4   2   12.00    8.90
   7   4  -2  171.48   18.50
   7   4  -2  222.18   16.40
   7   4  -2  165.18   12.00
  -7  -4   2  177.58   18.30
  -7  -4   2  181.88   17.40
  -7  -4   2  132.99   16.70
  -7  -4   2  180.38   16.00
   6   4  -2  124.69   13.70
   6   4  -2  119.89   14.80
   6   4  -2  105.89    9.80
  -6  -4   2   97.89   13.00
  -6  -4   2  101.79   12.80
  -6  -4   2  125.09   11.80
  -6  -4   2   97.69   13.60
  -6  -4   2  118.99   13.70
   5   4  -2   98.09    9.00
   5   4  -2   92.39   11.00
  -5  -4   2   90.89   11.70
  -5  -4   2   86.89   10.50
  -5  -4   2   98.59    9.10
  -5  -4   2   90.59   11.60
  -5  -4   2   81.79   10.50
  -5  -4   2   73.79   10.90
   4   4  -2  784.72   19.10
   4   4  -2  767.22   21.40
   4   4  -2  761.82   25.50
  -4  -4   2  794.72   27.30
  -4  -4   2  771.22   26.50
  -4  -4   2  789.12   24.00
  -4  -4   2  808.22   26.30
  -4  -4   2  763.72   25.50
   3   4  -2  542.95   17.70
   3   4  -2  527.85   20.00
   3   4  -2  560.64   14.00
  -3  -4   2  559.24   21.90
  -3  -4   2  538.45   17.90
  -3  -4   2  566.24   21.40
  -3  -4   2  539.05   20.30
  -3  -4   2  549.85   20.40
   2   4  -2  293.77   10.30
   2   4  -2  300.57   12.90
  -2  -4   2  315.67   15.50
  -2  -4   2  304.47   14.50
  -2  -4   2  248.58   12.10
  -2  -4   2  290.27   15.20
  -2  -4   2  283.87   14.60
   1   4  -2  527.95   14.40
   1   4  -2  579.14   18.30
  -1  -4   2  553.74   18.90
  -1  -4   2  557.94   18.90
  -1  -4   2  570.54   20.20
  -1  -4   2  551.84   16.70
  -1  -4   2  532.05   18.40
   0   4  -2  191.08   10.10
   0   4  -2  170.58   12.20
   0  -4   2  196.78   11.70
   0  -4   2  178.88   12.20
   0  -4   2  195.58   11.20
   0  -4   2  200.28   12.20
   0  -4   2  182.88   14.50
  -1   4  -2   33.60    7.70
  -1   4  -2   26.20    6.30
   1  -4   2   33.00    6.10
   1  -4   2   31.80    5.60
   1  -4   2   34.60    7.40
   1  -4   2   30.30    8.50
   1  -4   2   36.50    7.30
  -2   4  -2  572.74   21.50
  -2   4  -2  585.74   21.50
   2  -4   2  586.34   16.10
   2  -4   2  600.14   15.50
   2  -4   2  595.94   22.30
   2  -4   2  613.84   21.10
   2  -4   2  595.74   20.20
  -3   4  -2  282.07    8.60
  -3   4  -2  320.27    8.90
  -3   4  -2  311.87   17.20
  -3   4  -2  301.57   17.40
   3  -4   2  300.37   15.50
   3  -4   2  289.77   16.90
   3  -4   2  301.57    8.90
   3  -4   2  320.47   16.60
  -4   4  -2   15.80    7.60
  -4   4  -2   10.60    8.20
   4  -4   2   -0.80    5.70
   4  -4   2    9.30    8.40
   4  -4   2    9.20    7.60
  -5   4  -2  501.95   26.90
  -5   4  -2  441.06   23.30
   5  -4   2  482.85   24.80
   5  -4   2  433.36   24.30
   5  -4   2  474.85   21.60
  -6   4  -2    2.90    8.00
  -6   4  -2   11.90    9.50
   6  -4   2   -4.30    8.80
   6  -4   2    2.20    7.50
   6  -4   2  -17.30    8.60
  -7   4  -2   16.10   11.00
  -7   4  -2   57.09   12.90
   7  -4   2   56.29   13.80
   7  -4   2   71.09   15.30
  10   3  -2  151.58   21.00
  10   3  -2  155.38   20.90
  10   3  -2  153.68   20.10
 -10  -3   2  158.88   22.10
 -10  -3   2  152.48   21.20
   9   3  -2  -10.50    7.00
   9   3  -2   -5.80    7.40
   9   3  -2    2.20    9.40
  -9  -3   2    5.40    9.70
  -9  -3   2   -6.60    8.10
   8   3  -2  342.07   22.90
   8   3  -2  300.47   22.10
   8   3  -2  347.97   19.90
  -8  -3   2  385.66   25.80
  -8  -3   2  364.26   22.60
  -8  -3   2  340.47   23.70
   7   3  -2   51.89    9.60
   7   3  -2   45.80   10.70
   7   3  -2   57.79   12.10
  -7  -3   2   52.49   11.10
  -7  -3   2   57.89   10.50
  -7  -3   2   55.99    9.70
  -7  -3   2   67.39   13.10
  -7  -3   2   48.20   11.10
   6   3  -2 1094.29   32.70
   6   3  -2 1106.99   28.70
   6   3  -2 1115.69   35.90
  -6  -3   2 1118.19   35.20
  -6  -3   2 1081.69   30.00
  -6  -3   2 1115.99   32.60
  -6  -3   2 1063.49   34.60
  -6  -3   2 1124.59   33.60
  -6  -3   2 1134.59   37.50
   5   3  -2   87.89   10.30
   5   3  -2   76.29    7.90
   5   3  -2   74.69   10.70
  -5  -3   2   71.19    9.00
  -5  -3   2   66.49    9.40
  -5  -3   2   72.59   10.70
  -5  -3   2   78.59    8.90
  -5  -3   2   56.59    8.80
  -5  -3   2   82.29   11.40
  -5  -3   2   67.59    9.80
   4   3  -2   98.29   10.10
   4   3  -2  127.29    9.50
  -4  -3   2  125.59   10.50
  -4  -3   2  124.99   10.00
  -4  -3   2  113.89   10.90
  -4  -3   2  142.19   12.10
  -4  -3   2   95.09   10.90
  -4  -3   2  112.19   12.30
  -4  -3   2  108.79   11.30
   3   3  -2 1115.69   23.80
   3   3  -2 1138.29   25.80
  -3  -3   2 1083.49   26.70
  -3  -3   2 1149.78   29.80
  -3  -3   2 1094.29   28.40
  -3  -3   2 1144.29   29.50
  -3  -3   2 1140.89   24.70
  -3  -3   2 1080.79   29.90
   2   3  -2   36.80    4.20
   2   3  -2   31.30    4.90
  -2  -3   2   35.90    6.50
  -2  -3   2   44.70    6.90
  -2  -3   2   33.90    5.80
  -2  -3   2   41.90    5.10
  -2  -3   2   34.20    6.20
   1   3  -2   43.70    5.70
   1   3  -2   33.80    4.40
  -1  -3   2   35.90    4.50
  -1  -3   2   35.60    6.20
  -1  -3   2   32.00    5.20
  -1  -3   2   41.60    6.30
  -1  -3   2   39.00    5.40
   0   3  -2  299.57   12.20
   0   3  -2  282.17   10.30
   0  -3   2  273.87   11.80
   0  -3   2  285.77   10.20
   0  -3   2  289.27   11.20
   0  -3   2  293.57   12.30
   0  -3   2  290.27   11.90
  -1   3  -2  344.37   14.00
  -1   3  -2  368.16   13.80
   1  -3   2  344.57   11.80
   1  -3   2  354.26   13.50
   1  -3   2  344.97   12.20
   1  -3   2  356.66   13.00
   1  -3   2  384.46   15.20
  -2   3  -2  294.07   10.20
  -2   3  -2  284.47   13.90
  -2   3  -2  284.17   14.80
   2  -3   2  291.67   14.80
   2  -3   2  290.17   13.50
   2  -3   2  284.47   10.10
   2  -3   2  302.77   10.00
   2  -3   2  301.67   14.00
  -3   3  -2  218.68    6.20
  -3   3  -2  200.68   12.60
  -3   3  -2  216.98    6.10
  -3   3  -2  228.78    7.70
  -3   3  -2  244.18   14.70
   3  -3   2  209.78   14.50
   3  -3   2  229.08   12.70
   3  -3   2  226.48    7.80
   3  -3   2  211.18   13.60
  -4   3  -2  418.16   18.70
  -4   3  -2  367.16   19.40
   4  -3   2  375.56   18.50
   4  -3   2  404.46    8.70
   4  -3   2  404.46   17.70
   4  -3   2  400.16   19.60
  -5   3  -2   98.29   12.00
  -5   3  -2   86.09   13.00
   5  -3   2   96.39   13.10
   5  -3   2  108.59   12.30
   5  -3   2   83.09   12.40
  -6   3  -2   17.40    8.10
  -6   3  -2   37.30   11.00
   6  -3   2   13.20    8.80
   6  -3   2   33.20    9.40
   6  -3   2   19.10   10.60
  -7   3  -2    9.60    8.90
  -7   3  -2   27.70   11.80
   7  -3   2    5.20    9.50
   7  -3   2   22.60   11.00
   7  -3   2    5.40    7.90
  -8   3  -2   -5.10    9.00
   8  -3   2   -0.70    8.70
   8  -3   2   -1.40   11.80
   9   2  -2    2.30    9.40
   9   2  -2   -5.60    7.10
   9   2  -2   17.50   10.40
  -9  -2   2   12.50   10.70
  -9  -2   2   -4.80    9.70
   8   2  -2   34.40   11.00
   8   2  -2   68.59   14.00
   8   2  -2   53.09   12.20
  -8  -2   2   46.10   12.30
  -8  -2   2   46.70   12.10
  -8  -2   2   59.29   13.60
   7   2  -2  684.33   24.90
   7   2  -2  708.63   30.80
   7   2  -2  684.53   28.70
   7   2  -2  637.74   28.30
  -7  -2   2  689.13   30.00
  -7  -2   2  692.13   26.20
  -7  -2   2  679.83   29.30
  -7  -2   2  660.13   24.50
   6   2  -2  308.17   15.70
   6   2  -2  358.66   20.00
   6   2  -2  286.77   17.60
  -6  -2   2  341.97   17.30
  -6  -2   2  313.47   18.50
  -6  -2   2  306.67   20.10
  -6  -2   2  340.07   19.90
   5   2  -2  181.88   13.00
   5   2  -2  157.08   11.10
   5   2  -2  151.98   12.50
  -5  -2   2  168.08   12.60
  -5  -2   2  151.08   11.80
  -5  -2   2  179.08   13.80
  -5  -2   2  179.38   13.00
  -5  -2   2  159.58   11.40
  -5  -2   2  161.18   12.70
  -5  -2   2  141.99   11.00
   4   2  -2 1881.11   42.30
   4   2  -2 1829.82   40.00
  -4  -2   2 1840.02   41.80
  -4  -2   2 1853.91   39.90
  -4  -2   2 1894.01   42.10
  -4  -2   2 1793.22   42.70
  -4  -2   2 1769.62   39.90
  -4  -2   2 1866.11   39.80
  -4  -2   2 1841.22   41.40
  -3  -2   2  239.28   12.30
  -3  -2   2  266.47   13.20
  -3  -2   2  261.87   12.20
  -3  -2   2  257.07   11.90
  -3  -2   2  265.87   11.80
  -3  -2   2  274.77   12.70
  -3  -2   2  226.08   12.60
   2   2  -2  280.27    9.50
   2   2  -2  293.27   10.60
  -2  -2   2  284.67   10.10
  -2  -2   2  302.87   11.40
  -2  -2   2  265.87   12.00
  -2  -2   2  272.37   11.20
  -2  -2   2  289.27   12.10
  -2  -2   2  287.47   11.60
   1   2  -2 3645.44   61.39
   1   2  -2 3633.54   59.09
   1   2  -2 3743.13   57.59
  -1  -2   2 3720.13   62.89
  -1  -2   2 3686.53   64.29
  -1  -2   2 3825.12   60.89
  -1  -2   2 3731.53   63.09
  -1  -2   2 3700.03   57.89
   0   2  -2  809.92   17.80
   0   2  -2  803.42   18.80
   0   2  -2  787.52   15.40
   0  -2   2  779.22   19.20
   0  -2   2  812.62   19.70
   0  -2   2  805.22   15.70
   0  -2   2  818.92   18.80
   0  -2   2  801.82   18.30
  -1   2  -2   74.79    6.70
  -1   2  -2   71.79    5.50
  -1   2  -2   66.99    6.10
   1  -2   2   74.79    6.80
   1  -2   2   77.49    5.50
   1  -2   2   75.59    5.40
   1  -2   2   70.89    6.60
   1  -2   2   76.89    5.40
  -2   2  -2  234.28   12.10
  -2   2  -2  240.78    8.10
  -2   2  -2  222.98   11.10
  -2   2  -2  249.58    8.10
   2  -2   2  252.47   11.30
   2  -2   2  249.18   12.20
   2  -2   2  242.88   11.10
   2  -2   2  246.78    8.50
  -3   2  -2   79.59    9.90
  -3   2  -2   81.39    3.80
  -3   2  -2   73.99    5.80
  -3   2  -2   68.59    8.20
  -3   2  -2   80.49    3.60
   3  -2   2   94.49    9.60
   3  -2   2  101.09   11.00
   3  -2   2   82.59    9.80
   3  -2   2   77.49    5.70
  -4   2  -2   65.99    4.60
  -4   2  -2   53.79    8.80
  -4   2  -2   51.49    7.70
   4  -2   2   62.29    9.00
   4  -2   2   58.29    4.70
   4  -2   2   60.79    9.10
   4  -2   2   70.79    9.20
  -5   2  -2  176.98   13.10
  -5   2  -2  166.08   16.30
   5  -2   2  140.99   14.60
   5  -2   2  166.88   14.30
   5  -2   2  147.79    6.40
   5  -2   2  183.48   16.20
  -6   2  -2   96.39   12.30
  -6   2  -2  120.69   15.90
   6  -2   2  109.79   14.80
   6  -2   2  111.69   13.00
   6  -2   2  111.79   14.40
  -7   2  -2    9.30    9.30
  -7   2  -2   11.90    7.70
   7  -2   2    3.20    7.80
   7  -2   2    3.40    8.50
   7  -2   2    4.20    7.90
  -8   2  -2   73.09   15.90
   8  -2   2  137.19   19.30
   8  -2   2   92.69   14.20
   8  -2   2  123.59   18.60
  -9   2  -2   15.60   13.20
   9  -2   2    7.20   11.80
   9  -2   2    2.70   11.60
   9   1  -2   25.90   11.80
   9   1  -2   43.20   12.50
  -9  -1   2   43.90   14.80
   8   1  -2  237.58   17.80
   8   1  -2  173.58   19.80
   8   1  -2  241.58   23.10
  -8  -1   2  223.98   23.10
  -8  -1   2  253.27   24.30
  -8  -1   2  242.08   19.10
   7   1  -2   29.20    8.40
   7   1  -2   13.30    8.00
   7   1  -2   11.70    9.40
  -7  -1   2   19.70    9.10
  -7  -1   2   21.80    9.70
  -7  -1   2   13.80    8.90
   6   1  -2   18.50    7.30
   6   1  -2   22.40    8.10
   6   1  -2   25.80    8.30
   6   1  -2   14.40    5.50
   6   1  -2    8.00    5.90
  -6  -1   2   14.30    5.90
  -6  -1   2   11.30    7.70
  -6  -1   2   20.40    8.00
  -6  -1   2    5.70    7.30
   5   1  -2  155.18   12.00
   5   1  -2  157.58   10.80
   5   1  -2  166.58   10.60
   5   1  -2  163.18   14.60
   5   1  -2  162.68   13.40
  -5  -1   2  147.09   12.90
  -5  -1   2  142.99   13.70
  -5  -1   2  163.08   15.00
  -5  -1   2  160.88   10.70
   4   1  -2   11.50    5.30
   4   1  -2   20.50    6.10
   4   1  -2    9.20    4.60
  -4  -1   2    7.50    5.80
  -4  -1   2   19.80    7.20
  -4  -1   2    9.80    4.80
  -4  -1   2   17.20    6.30
  -4  -1   2   14.90    6.00
  -4  -1   2   13.90    6.70
   3   1  -2  485.85   16.70
  -3  -1   2  462.15   17.30
  -3  -1   2  478.15   15.50
  -3  -1   2  463.05   15.90
  -3  -1   2  475.15   16.30
  -3  -1   2  495.05   16.80
  -3  -1   2  475.55   17.10
  -3  -1   2  532.25   17.40
  -2  -1   2  410.46   13.10
  -2  -1   2  400.66   12.80
  -2  -1   2  391.76   12.80
  -2  -1   2  416.46   12.70
  -2  -1   2  378.46   13.10
  -2  -1   2  393.16   13.50
  -2  -1   2  407.06   13.40
   1   1  -2  728.53   16.30
   1   1  -2  710.33   14.90
   1   1  -2  727.73   14.50
   1   1  -2  727.23   16.90
  -1  -1   2  736.93   17.70
  -1  -1   2  733.23   17.00
  -1  -1   2  712.23   17.90
  -1  -1   2  733.23   17.40
  -1  -1   2  716.23   15.40
  -1  -1   2  718.03   14.60
   0   1  -2  232.98    8.50
   0   1  -2  231.18    7.10
   0   1  -2  235.38    9.60
   0   1  -2  221.58    8.00
   0  -1   2  216.88    8.40
   0  -1   2  220.58    8.80
   0  -1   2  218.98    7.20
   0  -1   2  222.78    8.40
  -1   1  -2 1346.27   24.20
  -1   1  -2 1300.57   26.10
  -1   1  -2 1327.27   27.30
  -1   1  -2 1344.17   25.50
  -1   1  -2 1352.46   25.30
   1  -1   2 1354.96   26.80
   1  -1   2 1303.07   27.80
   1  -1   2 1339.47   25.10
   1  -1   2 1349.56   24.10
   1  -1   2 1347.87   24.30
   1  -1   2 1373.76   25.40
  -2   1  -2 2037.20   38.60
  -2   1  -2 2025.30   34.20
  -2   1  -2 2020.10   37.90
  -2   1  -2 1954.00   36.10
   2  -1   2 2060.59   38.80
   2  -1   2 1968.10   38.10
   2  -1   2 1982.10   37.30
   2  -1   2 1980.60   34.00
   2  -1   2 1961.40   34.70
  -3   1  -2  772.02   15.50
  -3   1  -2  728.23   21.90
  -3   1  -2  764.72   22.30
  -3   1  -2  746.23   19.50
   3  -1   2  792.52   23.00
   3  -1   2  764.42   21.90
   3  -1   2  770.92   17.50
   3  -1   2  748.23   15.30
   3  -1   2  804.02   22.30
  -4   1  -2  221.68   14.10
  -4   1  -2  199.88   11.00
  -4   1  -2  227.48    6.30
  -4   1  -2  217.38   13.70
   4  -1   2  236.78   13.80
   4  -1   2  232.08    9.20
   4  -1   2  238.78   14.10
   4  -1   2  230.68    6.30
   4  -1   2  214.68   13.20
  -5   1  -2   82.19   11.00
  -5   1  -2   94.69    9.40
  -5   1  -2   89.89   11.80
   5  -1   2  106.49   11.20
   5  -1   2   92.99    6.50
   5  -1   2   86.79   11.70
   5  -1   2  104.39   12.30
  -6   1  -2    1.00    6.90
  -6   1  -2    7.50    7.70
  -6   1  -2   26.80    7.20
   6  -1   2    8.50    7.20
   6  -1   2   11.30    8.20
   6  -1   2   15.40    7.60
  -7   1  -2   73.39   10.80
  -7   1  -2   70.29   13.90
  -7   1  -2   79.59   14.20
   7  -1   2   66.39   13.40
   7  -1   2   88.69   14.50
   7  -1   2   68.09   12.20
  -8   1  -2   87.19   15.70
   8  -1   2   55.79   12.10
   8  -1   2   73.79   14.50
   8  -1   2   50.89   12.90
  -9   1  -2   13.00   11.70
   9  -1   2    8.60   10.30
   9  -1   2   18.50   10.80
   9  -1   2   18.50   11.40
   9   0  -2  -10.80    8.70
   9   0  -2   -3.00    8.10
  -9   0   2    1.30   11.40
   8   0  -2  215.58   21.90
   8   0  -2  195.28   21.20
  -8   0   2  203.68   23.50
  -8   0   2  203.38   20.00
   7   0  -2  100.19   12.60
   7   0  -2  108.29   15.00
   7   0  -2  100.69   15.50
  -7   0   2  103.39   16.90
  -7   0   2   98.59   13.80
   6   0  -2  440.06   23.10
   6   0  -2  513.25   24.00
   6   0  -2  482.65   20.60
   6   0  -2  469.75   17.60
   6   0  -2  454.25   16.50
  -6   0   2  467.25   25.30
  -6   0   2  534.95   24.10
   5   0  -2  131.19   13.20
   5   0  -2  149.19   11.30
   5   0  -2  132.69    8.80
   5   0  -2  126.19   13.20
   5   0  -2  142.39   10.00
  -5   0   2  133.89   13.70
  -5   0   2  170.78   13.50
  -5   0   2  140.39   15.40
   4   0  -2  930.31   27.10
   4   0  -2  904.91   22.10
   4   0  -2  891.91   24.50
   4   0  -2  890.11   23.60
   4   0  -2  959.30   28.20
  -4   0   2  938.41   28.40
  -4   0   2  894.61   28.80
  -4   0   2  921.81   22.00
  -4   0   2  892.81   27.20
   3   0  -2  383.56   13.90
   3   0  -2  376.96   15.50
   3   0  -2  382.46   14.40
   3   0  -2  362.36   15.00
  -3   0   2  406.16   16.70
  -3   0   2  385.96   17.40
  -3   0   2  405.56   12.90
  -3   0   2  399.06   16.60
   2   0  -2   47.00    5.50
   2   0  -2   52.79    5.70
   2   0  -2   69.69    6.60
  -2   0   2   49.90    5.80
  -2   0   2   60.89    5.50
  -2   0   2   49.90    6.60
  -2   0   2   53.59    5.10
  -2   0   2   61.99    6.60
   1   0  -2  567.44   13.10
   1   0  -2  582.34   12.50
   1   0  -2  559.54   13.10
   1   0  -2  567.64   12.70
   1   0  -2  542.75   15.00
  -1   0   2  584.64   14.00
  -1   0   2  552.34   15.70
  -1   0   2  568.14   15.50
  -1   0   2  573.94   12.70
   0   0  -2 3242.08   52.89
   0   0  -2 3290.77   54.69
   0   0  -2 3281.97   51.69
   0   0  -2 3375.06   49.70
   0   0  -2 3183.58   55.79
   0   0   2 3267.47   51.69
   0   0   2 3201.78   53.19
   0   0   2 3438.06   49.70
   0   0   2 3247.48   53.69
   0   0   2 3172.88   53.59
  -1   0  -2  241.48    7.20
  -1   0  -2  264.17    9.30
  -1   0  -2  250.47    7.30
  -1   0  -2  261.77    9.30
  -1   0  -2  251.97    7.20
   1   0   2  252.67    7.50
   1   0   2  258.37    8.60
   1   0   2  262.87    9.20
   1   0   2  256.77    7.20
   1   0   2  252.27    7.30
   1   0   2  266.77    7.40
  -2   0  -2  495.65   13.80
  -2   0  -2  504.35   13.30
  -2   0  -2  529.65   14.40
  -2   0  -2  526.75   11.60
   2   0   2  498.45   13.20
   2   0   2  543.65   15.50
   2   0   2  511.65   14.30
   2   0   2  524.75   11.50
  -3   0  -2   64.29    5.10
  -3   0  -2   82.19    8.20
  -3   0  -2   84.49    7.70
   3   0   2   71.79    6.10
   3   0   2   70.59    7.50
   3   0   2   81.49    8.20
  -4   0  -2  273.17   14.70
  -4   0  -2  251.37   10.30
  -4   0  -2  257.27   13.70
  -4   0  -2  265.57   10.80
   4   0   2  290.57   15.20
   4   0   2  275.37   11.40
   4   0   2  299.47   15.80
  -5   0  -2   46.50    8.60
  -5   0  -2   67.59    9.60
  -5   0  -2   51.59    5.30
  -5   0  -2   57.59    6.70
   5   0   2   50.69    9.50
   5   0   2   46.70    6.10
   5   0   2   44.10    8.30
  -6   0  -2  333.57   18.60
  -6   0  -2  429.76   21.50
  -6   0  -2  388.76   15.90
  -6   0  -2  376.66   11.60
   6   0   2  370.76   14.20
   6   0   2  370.56   19.70
   6   0   2  361.46   19.90
   6   0   2  406.56   21.20
  -7   0  -2  308.67   21.90
  -7   0  -2  312.47   21.00
  -7   0  -2  330.97   16.20
   7   0   2  309.97   20.70
   7   0   2  306.57   19.70
   7   0   2  285.27   21.10
  -8   0  -2  275.97   21.70
  -8   0  -2  252.97   23.30
   8   0   2  275.27   21.60
   8   0   2  248.08   20.60
   8   0   2  280.67   21.00
  -9   0  -2   20.00   12.30
  -9   0  -2    3.40    9.80
   9   0   2   17.40   10.10
   9   0   2    4.00   10.00
   9   0   2   14.20    9.50
   8  -1  -2   80.79   15.90
   8  -1  -2   94.99   16.60
  -8   1   2   82.19   18.00
  -8   1   2   88.49   16.00
   7  -1  -2  279.57   21.70
   7  -1  -2  266.97   21.00
  -7   1   2  287.57   26.00
  -7   1   2  273.97   21.60
   6  -1  -2  368.06   21.10
   6  -1  -2  370.26   17.60
   6  -1  -2  403.46   23.40
  -6   1   2  359.66   21.70
  -6   1   2  380.16   24.60
   5  -1  -2  764.82   18.30
   5  -1  -2  739.43   26.80
   5  -1  -2  700.33   27.40
   5  -1  -2  788.62   23.40
   5  -1  -2  746.03   20.40
  -5   1   2  741.23   29.70
  -5   1   2  789.72   28.50
   4  -1  -2   32.60    4.30
   4  -1  -2   33.20    7.40
   4  -1  -2   16.50    6.40
   4  -1  -2   25.30    5.10
   4  -1  -2   18.40    4.90
  -4   1   2   31.60    8.00
  -4   1   2   24.10    7.60
  -4   1   2   19.20    3.80
   3  -1  -2    3.00    5.00
   3  -1  -2    4.80    4.30
   3  -1  -2    5.20    3.70
   3  -1  -2    4.30    5.00
  -3   1   2    1.70    3.10
  -3   1   2    6.50    6.30
  -3   1   2    9.80    6.40
   2  -1  -2  372.56   13.00
   2  -1  -2  344.47    9.70
   2  -1  -2  360.86   10.10
   2  -1  -2  357.06   13.60
   2  -1  -2  381.56   12.50
  -2   1   2  362.26   15.00
  -2   1   2  364.36   10.40
  -2   1   2  358.46   14.70
   1  -1  -2   66.99    4.90
   1  -1  -2   61.39    5.80
   1  -1  -2   66.29    4.60
   1  -1  -2   75.29    6.30
   1  -1  -2   66.59    3.00
  -1   1   2   65.19    6.50
  -1   1   2   65.39    3.10
  -1   1   2   61.69    4.60
  -1   1   2   60.99    6.50
   0  -1  -2 4182.78   62.19
   0  -1  -2 4015.70   67.09
   0  -1  -2 4012.10   65.79
   0  -1  -2 4218.88   64.69
   0  -1  -2 4000.80   61.69
   0   1   2 4078.29   65.09
   0   1   2 4004.10   66.59
   0   1   2 4139.19   61.69
   0   1   2 4106.19   62.09
   0   1   2 4090.29   66.89
  -1  -1  -2 4419.76   70.19
  -1  -1  -2 4415.26   68.39
  -1  -1  -2 4467.65   69.69
  -1  -1  -2 4626.94   69.69
  -1  -1  -2 4382.26   72.79
   1   1   2 4492.55   72.19
   1   1   2 4475.95   67.99
   1   1   2 4418.86   70.19
   1   1   2 4497.35   69.49
   1   1   2 4362.86   69.19
   1   1   2 4453.75   71.39
  -2  -1  -2 6604.84   98.49
  -2  -1  -2 6821.82  102.39
  -2  -1  -2 6688.93  104.39
  -2  -1  -2 6824.32   98.09
  -2  -1  -2 6516.65  105.19
  -2  -1  -2 6618.14  103.79
   2   1   2 6560.34  105.49
   2   1   2 6559.44  104.49
  -3  -1  -2 3621.64   63.79
  -3  -1  -2 3508.85   54.39
  -3  -1  -2 3610.14   64.69
  -3  -1  -2 3533.05   60.69
   3   1   2 3646.44   61.99
   3   1   2 3622.34   64.59
   3   1   2 3715.33   54.39
   3   1   2 3567.74   63.99
  -4  -1  -2    5.80    6.30
  -4  -1  -2    0.90    4.20
  -4  -1  -2    4.50    4.50
  -4  -1  -2    1.80    2.80
  -4  -1  -2    2.80    5.60
   4   1   2   -0.30    2.50
   4   1   2   -1.00    4.30
   4   1   2    9.50    5.60
   4   1   2    8.50    5.60
  -5  -1  -2  354.06   13.90
  -5  -1  -2  367.36   16.50
  -5  -1  -2  377.86   18.30
  -5  -1  -2  385.66   11.90
   5   1   2  376.86   18.50
   5   1   2  347.27   17.40
   5   1   2  367.16   14.60
  -6  -1  -2   18.00    4.40
  -6  -1  -2   18.80    7.10
  -6  -1  -2   13.60    4.60
  -6  -1  -2   21.50    7.00
   6   1   2   16.70    5.40
   6   1   2   24.40    8.10
   6   1   2    9.80    6.80
  -7  -1  -2    6.50    7.80
  -7  -1  -2    7.70    4.80
  -7  -1  -2   19.50    8.10
   7   1   2    8.20    7.60
   7   1   2    1.40    6.80
   7   1   2    6.70    5.30
  -8  -1  -2   -8.10    7.30
  -8  -1  -2   -5.70    6.80
   8   1   2    8.80    8.20
   8   1   2    4.60    8.30
  -9  -1  -2   36.80   12.10
  -9  -1  -2   29.00   11.50
   9   1   2   29.70   12.90
   9   1   2   20.30   10.50
   9   1   2   33.90   11.50
 -10  -1  -2   54.19   14.30
 -10  -1  -2   54.89   13.70
  10   1   2   28.20   12.60
  10   1   2   41.10   14.20
  10   1   2   52.89   14.70
   8  -2  -2   18.00   11.50
   8  -2  -2    3.90   12.20
  -8   2   2   16.30   11.40
  -8   2   2   19.00   12.30
   7  -2  -2   -7.30    7.70
   7  -2  -2  -10.40    8.60
  -7   2   2    4.10   11.60
  -7   2   2   -7.30    8.40
   6  -2  -2  103.19   13.80
   6  -2  -2   82.89   13.90
  -6   2   2   92.19   14.50
  -6   2   2   96.69   16.40
   5  -2  -2  211.68   18.80
   5  -2  -2  211.68   11.60
   5  -2  -2  195.48   15.20
  -5   2   2  185.98   17.50
  -5   2   2  193.98   18.70
   4  -2  -2  167.98   13.60
   4  -2  -2  192.18   13.20
   4  -2  -2  164.48    9.00
   4  -2  -2  170.78    5.90
   4  -2  -2  172.88    9.30
  -4   2   2  167.68   16.10
  -4   2   2  176.78   15.60
   3  -2  -2  656.03   21.80
   3  -2  -2  640.54   13.60
   3  -2  -2  623.04   15.40
   3  -2  -2  602.74   17.20
   3  -2  -2  687.13   23.40
  -3   2   2  640.44   23.90
  -3   2   2  640.24   13.70
  -3   2   2  674.63   24.80
   2  -2  -2 1213.58   28.30
   2  -2  -2 1158.68   21.00
   2  -2  -2 1202.88   29.90
   2  -2  -2 1195.58   22.30
   2  -2  -2 1154.98   20.70
   2  -2  -2 1199.08   26.50
  -2   2   2 1190.78   31.30
  -2   2   2 1168.48   31.50
  -2   2   2 1184.88   22.20
   1  -2  -2   61.39    5.00
   1  -2  -2   70.89    6.70
   1  -2  -2   70.49    7.50
   1  -2  -2   85.59    6.50
  -1   2   2   66.49    4.90
  -1   2   2   74.79    8.10
  -1   2   2   78.39    8.00
   0  -2  -2 2943.11   51.09
   0  -2  -2 2834.42   52.39
   0  -2  -2 3009.90   49.30
   0   2   2 2992.70   52.69
   0   2   2 3032.70   52.19
   0   2   2 2993.30   49.60
   0   2   2 2903.71   44.70
   0   2   2 2949.51   44.80
  -1  -2  -2  533.25   13.20
  -1  -2  -2  544.05   16.40
  -1  -2  -2  557.64   15.00
  -1  -2  -2  537.85   13.30
  -1  -2  -2  556.44   13.10
   1   2   2  540.75   13.30
   1   2   2  520.05   13.80
   1   2   2  498.05   14.40
  -2  -2  -2 1099.89   23.60
  -2  -2  -2 1090.99   26.10
  -2  -2  -2 1073.19   19.50
  -2  -2  -2 1068.49   23.50
  -2  -2  -2 1086.49   20.90
   2   2   2 1117.29   24.90
   2   2   2 1122.79   24.90
   2   2   2 1116.79   20.90
   2   2   2 1042.60   19.70
  -3  -2  -2  422.66   15.50
  -3  -2  -2  407.96   15.10
  -3  -2  -2  424.86   14.90
  -3  -2  -2  424.56   11.90
   3   2   2  421.06   14.80
   3   2   2  391.86   15.10
  -4  -2  -2   60.09    9.30
  -4  -2  -2   43.50    6.20
  -4  -2  -2   51.39    7.70
  -4  -2  -2   51.09    8.30
   4   2   2   58.99    7.70
   4   2   2   65.59    9.20
  -5  -2  -2   99.59   12.70
  -5  -2  -2   81.89    4.30
  -5  -2  -2   76.19   10.20
  -5  -2  -2   88.99    9.10
   5   2   2   79.89   10.90
   5   2   2   79.49    9.00
   5   2   2   81.49   11.30
   5   2   2   79.39    3.70
  -6  -2  -2  188.08    7.80
  -6  -2  -2  195.38   12.90
  -6  -2  -2  190.28   12.20
  -6  -2  -2  175.58   15.90
  -6  -2  -2  120.49   13.70
   6   2   2  185.88   12.30
   6   2   2  156.18   15.10
   6   2   2  191.58   14.90
  -7  -2  -2   47.20   10.50
  -7  -2  -2   61.69    8.80
  -7  -2  -2   58.19   10.20
   7   2   2   65.09   12.10
   7   2   2   66.79    9.60
   7   2   2   59.49   11.50
  -8  -2  -2   77.19   12.80
  -8  -2  -2   66.89   13.00
   8   2   2  103.19   16.30
   8   2   2   47.80   11.20
   8   2   2   82.79   11.00
  -9  -2  -2   98.89   15.00
  -9  -2  -2  134.49   18.10
   9   2   2  149.79   19.50
   9   2   2  132.89   18.00
 -10  -2  -2   16.30   11.30
 -10  -2  -2   33.90   13.50
  10   2   2   31.90   13.00
  10   2   2   24.60   12.40
  10   2   2   20.80   10.90
   7  -3  -2   14.60   11.10
   7  -3  -2    3.10    8.60
  -7   3   2    7.00   11.90
  -7   3   2   13.30   10.90
   6  -3  -2  128.39   17.20
   6  -3  -2  116.89   15.40
  -6   3   2  123.89   16.90
  -6   3   2  142.19   19.30
   5  -3  -2    4.50    7.20
   5  -3  -2   -2.20    7.50
  -5   3   2    0.10    7.50
  -5   3   2  -15.80    6.90
   4  -3  -2   16.60    8.00
   4  -3  -2    9.70    4.20
   4  -3  -2   17.20    7.60
  -4   3   2   15.30    8.10
  -4   3   2   12.00    7.70
   3  -3  -2  198.98    9.90
   3  -3  -2  204.48   13.80
   3  -3  -2  202.78   14.30
   3  -3  -2  198.48    7.50
  -3   3   2  201.68   14.90
  -3   3   2  203.08   15.20
   2  -3  -2   64.19    3.90
   2  -3  -2   60.59    3.90
   2  -3  -2   66.99    4.60
   2  -3  -2   71.29    7.30
   2  -3  -2   71.69    9.60
   2  -3  -2   74.29    8.90
  -2   3   2   72.99   10.40
  -2   3   2   59.59    4.60
  -2   3   2   76.69   10.60
  -2   3   2   69.39    4.10
   1  -3  -2   13.20    6.30
   1  -3  -2   17.50    5.60
   1  -3  -2   15.60    6.90
  -1   3   2   13.40    6.50
  -1   3   2    2.90    5.40
  -1   3   2   14.70    3.80
   0  -3  -2 1423.26   30.00
   0  -3  -2 1486.25   32.70
   0  -3  -2 1445.16   24.50
   0   3   2 1436.56   31.50
   0   3   2 1428.76   32.80
   0   3   2 1441.26   24.70
   0   3   2 1433.26   24.00
   0   3   2 1452.45   28.90
  -1  -3  -2 2282.57   45.60
  -1  -3  -2 2337.97   43.10
  -1  -3  -2 2234.68   41.10
  -1  -3  -2 2237.28   39.90
   1   3   2 2180.08   42.10
   1   3   2 2232.18   39.70
   1   3   2 2264.17   40.70
   1   3   2 2295.47   42.60
  -2  -3  -2  484.45   17.30
  -2  -3  -2  473.75   11.50
  -2  -3  -2  480.25   12.10
  -2  -3  -2  490.25   15.60
  -2  -3  -2  499.25   15.00
   2   3   2  470.95   15.90
   2   3   2  488.75   11.70
   2   3   2  476.85   15.30
   2   3   2  460.75   13.10
  -3  -3  -2   44.20    3.40
  -3  -3  -2   27.80    6.30
  -3  -3  -2   33.60    6.30
  -3  -3  -2   36.50    6.60
  -3  -3  -2   29.90    3.80
   3   3   2   29.00    5.90
   3   3   2   39.00    4.10
   3   3   2   41.30    6.70
   3   3   2   37.60    3.60
  -4  -3  -2    5.30    6.10
  -4  -3  -2    3.60    3.70
  -4  -3  -2   11.60    6.60
  -4  -3  -2   15.30    7.10
   4   3   2   18.10    6.60
   4   3   2    4.10    6.40
  -5  -3  -2  151.18   13.50
  -5  -3  -2  177.68   12.80
  -5  -3  -2  183.08   13.70
  -5  -3  -2  161.98    9.70
   5   3   2  186.28   12.80
   5   3   2  165.28   15.00
  -6  -3  -2  209.88   12.10
  -6  -3  -2  184.48   14.40
  -6  -3  -2  186.58   13.70
  -6  -3  -2  200.88   15.50
   6   3   2  196.88   13.40
   6   3   2  163.18   15.70
  -7  -3  -2  132.89   16.60
  -7  -3  -2  127.09   15.00
  -7  -3  -2  127.69   12.80
   7   3   2  115.19   15.10
   7   3   2   98.79   14.10
   7   3   2  116.69   12.60
  -8  -3  -2  125.69   16.20
  -8  -3  -2  155.38   18.30
  -8  -3  -2  149.99   15.30
  -8  -3  -2  167.38   14.20
   8   3   2  157.28   15.60
   8   3   2  113.89   15.60
   8   3   2  180.98   19.20
  -9  -3  -2   39.20   10.80
  -9  -3  -2   65.99   14.80
   9   3   2   49.50   13.80
   9   3   2   57.99   11.20
   9   3   2   39.00   12.60
 -10  -3  -2   24.40   11.40
 -10  -3  -2   16.50   10.30
  10   3   2   14.90   10.00
  10   3   2   27.70   11.90
   7  -4  -2  203.18   23.20
   7  -4  -2  252.17   25.80
  -7   4   2  269.57   27.80
  -7   4   2  292.77   28.20
   6  -4  -2    8.20   10.70
   6  -4  -2   18.90   11.30
  -6   4   2   16.70   11.60
  -6   4   2   21.10   10.90
   5  -4  -2  140.59   17.60
   5  -4  -2  147.79   17.40
  -5   4   2  134.99   18.20
  -5   4   2  117.89   17.60
   4  -4  -2  155.58   17.50
   4  -4  -2  121.59   14.80
  -4   4   2  153.68   17.50
  -4   4   2  130.99   16.70
   3  -4  -2  326.37   18.30
   3  -4  -2  327.27   13.10
   3  -4  -2  358.16   19.90
  -3   4   2  354.76   20.10
  -3   4   2  334.77   20.60
   2  -4  -2   21.90    3.20
   2  -4  -2   13.20    4.70
   2  -4  -2   21.40    7.60
   2  -4  -2   15.60    2.70
   2  -4  -2   20.30    7.30
  -2   4   2   24.10    8.00
  -2   4   2   20.00    2.80
  -2   4   2   11.60    6.40
  -2   4   2   19.60    3.10
   1  -4  -2   31.70    3.10
   1  -4  -2   38.00    9.00
   1  -4  -2   27.40    5.90
   1  -4  -2   33.10    8.50
  -1   4   2   35.20    4.80
  -1   4   2   28.80    2.90
  -1   4   2   41.80    8.50
  -1   4   2   28.30    7.70
   0  -4  -2  392.26   11.00
   0  -4  -2  391.66   16.60
   0  -4  -2  421.06   18.20
   0  -4  -2  425.46   17.70
   0   4   2  368.76   17.00
   0   4   2  416.86   14.10
   0   4   2  399.46   10.60
   0   4   2  400.16   16.40
  -1  -4  -2  166.48   12.10
  -1  -4  -2  182.78   12.80
  -1  -4  -2  205.78   13.70
  -1  -4  -2  165.18    9.00
   1   4   2  151.48   10.60
   1   4   2  189.18   10.20
   1   4   2  188.78    9.40
   1   4   2  175.18   10.60
  -2  -4  -2  262.47   15.30
  -2  -4  -2  269.37   14.30
  -2  -4  -2  259.47   12.80
  -2  -4  -2  252.37   12.10
  -2  -4  -2  263.87    9.10
   2   4   2  235.78   11.40
   2   4   2  263.67   12.60
   2   4   2  260.67   12.80
  -3  -4  -2  878.71   17.90
  -3  -4  -2  844.92   24.50
  -3  -4  -2  865.01   27.30
  -3  -4  -2  830.32   24.90
  -3  -4  -2  901.11   17.80
   3   4   2  909.01   20.40
   3   4   2  864.91   17.40
   3   4   2  914.21   26.10
   3   4   2  929.11   26.40
  -4  -4  -2  433.06   18.90
  -4  -4  -2  444.26   20.60
  -4  -4  -2  439.86   19.40
  -4  -4  -2  431.96   11.50
   4   4   2  409.96   18.70
   4   4   2  468.85   19.00
   4   4   2  435.06   11.30
  -5  -4  -2    1.10    3.00
  -5  -4  -2   -1.70    5.20
  -5  -4  -2    3.70    5.40
  -5  -4  -2    5.20    5.80
   5   4   2   -2.20    4.80
   5   4   2   -4.90    5.20
   5   4   2    1.60    1.70
  -6  -4  -2    4.60    6.50
  -6  -4  -2    3.00    5.80
  -6  -4  -2    0.90    3.70
  -6  -4  -2   -3.20    6.30
   6   4   2    7.10    5.80
   6   4   2    8.80    6.00
  -7  -4  -2  246.78   18.90
  -7  -4  -2  260.37   14.30
  -7  -4  -2  234.48   16.90
  -7  -4  -2  264.17   18.50
   7   4   2  243.68   16.80
   7   4   2  250.57   19.50
  -8  -4  -2   21.00    8.40
  -8  -4  -2   37.70    8.60
  -8  -4  -2   13.70   10.60
  -8  -4  -2   18.60   10.10
   8   4   2   25.40    9.10
   8   4   2   28.70    9.80
   8   4   2   30.70   11.50
  -9  -4  -2  303.77   27.70
  -9  -4  -2  260.47   18.80
  -9  -4  -2  269.37   24.90
   9   4   2  315.27   25.00
   9   4   2  257.07   19.10
   9   4   2  284.07   23.10
 -10  -4  -2   91.69   17.10
 -10  -4  -2   92.39   18.40
  10   4   2   85.29   16.80
  10   4   2   97.89   16.90
  11   4   2   12.60   11.80
   6  -5  -2   38.00   15.00
   6  -5  -2   13.30   12.00
  -6   5   2   25.80   13.00
  -6   5   2   16.80   12.10
   5  -5  -2   58.09   14.00
   5  -5  -2   98.59   17.20
  -5   5   2  100.39   17.10
  -5   5   2   58.09   14.70
   4  -5  -2   32.80   12.10
   4  -5  -2   71.69   14.30
  -4   5   2   44.80   12.40
  -4   5   2   41.90   11.60
   3  -5  -2   -3.20    7.90
   3  -5  -2    0.00    8.70
  -3   5   2    4.90    8.40
  -3   5   2    7.50    7.50
   2  -5  -2   32.60    6.70
   2  -5  -2   32.60   10.70
   2  -5  -2   19.30    9.00
  -2   5   2   15.30    7.30
  -2   5   2   23.70    9.20
   1  -5  -2  274.07    8.80
   1  -5  -2  245.78   16.40
   1  -5  -2  245.48   13.60
   1  -5  -2  263.87   17.00
  -1   5   2  270.67   16.10
  -1   5   2  256.37   10.40
  -1   5   2  258.67   16.20
  -1   5   2  273.57   10.40
   0  -5  -2   54.69    8.60
   0  -5  -2   35.30    8.80
   0  -5  -2   50.09    5.30
   0  -5  -2   49.99   10.50
   0   5   2   37.90    7.40
   0   5   2   57.49    6.90
   0   5   2   37.30    7.90
  -1  -5  -2  338.57   12.90
  -1  -5  -2  346.17   16.90
  -1  -5  -2  355.06   18.70
  -1  -5  -2  320.87   16.40
   1   5   2  337.27   14.20
   1   5   2  358.56   16.80
   1   5   2  338.17   14.60
  -2  -5  -2  242.58    9.80
  -2  -5  -2  233.68   15.60
  -2  -5  -2  295.17   16.80
  -2  -5  -2  226.38   14.70
  -2  -5  -2  239.48   12.70
   2   5   2  216.68   12.70
   2   5   2  244.38   12.90
   2   5   2  228.18   12.90
   2   5   2  230.98   10.20
  -3  -5  -2    4.80    6.30
  -3  -5  -2   -3.40    6.60
  -3  -5  -2    5.60    6.10
  -3  -5  -2    9.90    3.20
  -3  -5  -2    3.20    2.70
  -3  -5  -2    0.50    5.10
   3   5   2    8.90    4.40
   3   5   2   -2.00    5.80
   3   5   2    1.10    5.20
  -4  -5  -2  153.78   14.00
  -4  -5  -2  150.88    5.90
  -4  -5  -2  146.99    5.30
  -4  -5  -2  128.09   14.10
  -4  -5  -2  118.79   11.90
   4   5   2  162.78   14.70
   4   5   2  143.49    8.20
   4   5   2  127.09   12.40
   4   5   2  152.08    5.50
  -5  -5  -2    7.50    6.10
  -5  -5  -2    9.80    2.90
  -5  -5  -2   10.60    7.20
  -5  -5  -2   10.80    6.60
   5   5   2   18.10    7.80
   5   5   2    5.60    5.40
   5   5   2    6.00    2.80
  -6  -5  -2  107.39   12.60
  -6  -5  -2  121.19   14.10
  -6  -5  -2  137.69   15.50
  -6  -5  -2  115.09    7.80
   6   5   2  109.69   13.00
   6   5   2  123.09    4.90
   6   5   2  135.79   15.50
  -7  -5  -2   18.40    8.70
  -7  -5  -2   31.70   10.30
  -7  -5  -2   38.10    6.70
  -7  -5  -2   19.20    9.20
   7   5   2   39.20    9.50
   7   5   2   35.80   11.00
  -8  -5  -2  563.24   21.50
  -8  -5  -2  516.65   26.00
  -8  -5  -2  525.25   27.50
  -8  -5  -2  501.75   28.40
   8   5   2  538.65   26.40
   8   5   2  524.45   28.90
  -9  -5  -2   26.70   11.60
  -9  -5  -2   24.10   10.20
  -9  -5  -2   41.10   12.60
   9   5   2   34.40   11.80
   9   5   2   27.70   10.10
   9   5   2   29.80   11.20
 -10  -5  -2  117.39   18.40
 -10  -5  -2  152.88   20.90
  10   5   2  154.88   21.60
  10   5   2  104.19   16.70
  10   5   2  123.79   19.90
 -11  -5  -2   97.49   19.80
  11   5   2   98.39   19.30
  11   5   2  131.79   20.80
   5  -6  -2   54.49   17.20
   5  -6  -2   37.40   14.30
  -5   6   2   53.39   14.50
  -5   6   2   39.90   14.40
   4  -6  -2   31.10   13.10
   4  -6  -2   33.90   13.40
  -4   6   2   49.60   12.50
  -4   6   2   48.80   14.00
   3  -6  -2   57.39   14.90
   3  -6  -2   56.99   14.10
  -3   6   2   80.89   14.50
  -3   6   2   82.69   14.20
   2  -6  -2   41.50   12.40
   2  -6  -2   59.69   13.60
   2  -6  -2   40.60   12.20
  -2   6   2   35.90   11.30
  -2   6   2   52.49   11.90
   1  -6  -2   25.40    7.20
   1  -6  -2   13.50    9.90
   1  -6  -2   40.50   11.10
  -1   6   2   13.40    6.80
  -1   6   2   25.20    8.40
  -1   6   2   25.30    5.20
   0  -6  -2   70.29   11.50
   0  -6  -2   87.09    7.00
   0  -6  -2   79.19   10.80
   0  -6  -2   71.39   10.60
   0   6   2   64.99   10.50
   0   6   2   77.19    8.30
   0   6   2   47.20    8.50
  -1  -6  -2   -0.80    6.30
  -1  -6  -2    9.40    6.20
  -1  -6  -2    9.30    7.60
  -1  -6  -2    9.00    4.00
   1   6   2   -0.10    4.10
   1   6   2    2.60    4.60
   1   6   2    7.30    5.20
  -2  -6  -2   98.29   11.80
  -2  -6  -2  101.79   11.50
  -2  -6  -2   96.19    9.60
  -2  -6  -2   92.29   12.00
   2   6   2   94.49    7.80
   2   6   2  107.29   11.30
   2   6   2   87.59   10.30
  -3  -6  -2  744.83   25.80
  -3  -6  -2  728.33   25.30
  -3  -6  -2  693.03   27.60
  -3  -6  -2  735.73   24.20
  -3  -6  -2  727.63   15.80
   3   6   2  726.13   24.60
   3   6   2  738.53   25.50
   3   6   2  708.93   22.30
  -4  -6  -2  870.61   28.10
  -4  -6  -2  840.22   27.90
  -4  -6  -2  779.02   27.30
  -4  -6  -2  817.42   30.70
   4   6   2  809.12   28.20
   4   6   2  862.51   22.90
   4   6   2  828.22   28.30
  -5  -6  -2   56.89   10.30
  -5  -6  -2   37.90    9.20
  -5  -6  -2   64.39   11.90
   5   6   2   54.09    6.10
   5   6   2   61.89   10.10
   5   6   2   56.49   10.60
  -6  -6  -2   55.39   11.80
  -6  -6  -2   44.70    9.80
  -6  -6  -2   61.79   11.70
   6   6   2   59.39    5.60
   6   6   2   48.40   10.00
   6   6   2   48.20   10.70
  -7  -6  -2   33.80   11.20
  -7  -6  -2   39.70   11.90
  -7  -6  -2   42.00   11.10
   7   6   2   38.00   11.20
   7   6   2   27.20    9.20
  -8  -6  -2   29.90   11.10
  -8  -6  -2   32.60   11.20
  -8  -6  -2   57.39   12.60
   8   6   2   55.49   12.00
   8   6   2   43.70   11.80
  -9  -6  -2  198.78   22.60
  -9  -6  -2  170.18   19.70
  -9  -6  -2  187.28   21.10
   9   6   2  199.78   23.50
   9   6   2  179.78   19.10
 -10  -6  -2  -12.00    7.00
 -10  -6  -2   -7.30    9.80
 -10  -6  -2   -0.10    9.50
  10   6   2   -0.50    9.10
  10   6   2   10.60   10.70
  10   6   2   -4.70    8.90
 -11  -6  -2   28.10   12.60
 -11  -6  -2   42.30   15.20
  11   6   2    9.60   10.80
  11   6   2    0.20   10.20
  11   6   2   23.10   13.50
   4  -7  -2   -5.60   14.00
   4  -7  -2  -22.60   11.30
  -4   7   2  -24.80    8.80
  -4   7   2    0.60    9.70
   3  -7  -2  210.58   23.90
   3  -7  -2  204.38   23.50
  -3   7   2  257.37   24.60
  -3   7   2  206.78   22.30
   2  -7  -2   19.10   13.30
   2  -7  -2    7.70   11.90
  -2   7   2   39.30   12.80
  -2   7   2   35.60   11.40
   1  -7  -2  543.95   27.40
   1  -7  -2  495.95   22.00
   1  -7  -2  504.15   26.90
  -1   7   2  537.65   27.50
  -1   7   2  539.15   25.30
   0  -7  -2  619.74   28.70
   0  -7  -2  618.14   27.00
   0  -7  -2  614.24   25.50
   0   7   2  605.24   20.40
   0   7   2  597.74   24.60
   0   7   2  571.94   27.30
  -1  -7  -2   14.60    9.50
  -1  -7  -2   13.70    8.70
  -1  -7  -2   18.40    7.70
  -1  -7  -2   26.70    5.90
   1   7   2   22.90    6.50
   1   7   2   17.70    6.30
   1   7   2   13.10    7.20
  -2  -7  -2   41.50    9.70
  -2  -7  -2   25.10    9.30
  -2  -7  -2   23.70    6.70
  -2  -7  -2   24.90    9.00
   2   7   2   26.30    8.20
   2   7   2   14.70    6.60
   2   7   2   13.60    5.20
  -3  -7  -2  123.19   15.00
  -3  -7  -2  113.09   13.50
  -3  -7  -2  104.69   12.50
  -3  -7  -2  119.69   12.40
  -3  -7  -2  105.19    6.70
   3   7   2  151.88   13.80
   3   7   2   94.19   10.60
   3   7   2  108.19   12.70
  -4  -7  -2  262.87   16.60
  -4  -7  -2  279.47   19.20
  -4  -7  -2  246.48   16.90
  -4  -7  -2  249.97   17.20
   4   7   2  226.88   16.70
   4   7   2  240.98   16.40
   4   7   2  247.78   13.80
  -5  -7  -2    0.40    7.80
  -5  -7  -2   10.70    7.80
  -5  -7  -2    0.60    6.00
  -5  -7  -2   10.80    8.00
   5   7   2  -10.20    4.90
   5   7   2    8.80    4.70
   5   7   2    3.00    6.90
  -6  -7  -2  431.56   23.50
  -6  -7  -2  363.66   21.60
  -6  -7  -2  457.65   26.20
   6   7   2  430.16   15.00
   6   7   2  403.46   23.60
   6   7   2  392.36   23.00
  -7  -7  -2  271.07   21.70
  -7  -7  -2  276.47   21.20
  -7  -7  -2  263.07   20.90
   7   7   2  286.47   22.00
   7   7   2  260.17   20.50
  -8  -7  -2   14.50   10.90
  -8  -7  -2   26.20   11.90
  -8  -7  -2   31.30   12.10
   8   7   2   28.10   10.80
   8   7   2   33.90   11.60
  -9  -7  -2  463.45   28.50
  -9  -7  -2  472.25   29.90
  -9  -7  -2  436.86   28.10
   9   7   2  483.95   31.00
   9   7   2  482.25   28.80
 -10  -7  -2  295.57   28.30
 -10  -7  -2  250.47   27.10
 -10  -7  -2  273.27   22.90
  10   7   2  218.98   24.60
  10   7   2  277.67   25.90
   3  -8  -2   25.10   16.50
   3  -8  -2   38.80   16.20
  -3   8   2   60.59   15.30
  -3   8   2   49.90   14.00
   2  -8  -2  333.17   26.10
   2  -8  -2  381.36   27.30
  -2   8   2  331.07   23.90
  -2   8   2  379.86   27.40
   1  -8  -2   -4.30   10.20
   1  -8  -2    0.90   11.90
  -1   8   2   -2.00    7.60
  -1   8   2   -3.00    9.10
   0  -8  -2  241.98   18.20
   0  -8  -2  259.27   22.80
   0  -8  -2  218.28   20.80
   0   8   2  225.38   17.20
   0   8   2  218.28   20.50
  -1  -8  -2  226.98   20.10
  -1  -8  -2  190.38   19.30
  -1  -8  -2  183.88   18.80
   1   8   2  220.78   14.80
   1   8   2  248.48   19.10
   1   8   2  201.58   15.00
  -2  -8  -2   22.50    7.40
  -2  -8  -2   28.70   11.00
  -2  -8  -2   34.80   10.70
  -2  -8  -2   30.40   10.10
   2   8   2   42.60    7.70
   2   8   2   19.20    7.50
   2   8   2   25.50    9.00
  -3  -8  -2   56.49   12.40
  -3  -8  -2   63.59   12.80
  -3  -8  -2   53.99   13.00
  -3  -8  -2   54.99   10.00
   3   8   2   71.89   11.50
   3   8   2   47.10    9.60
   3   8   2   57.99   10.50
  -4  -8  -2   32.80    8.70
  -4  -8  -2   15.50    9.60
  -4  -8  -2   22.30    9.90
  -4  -8  -2    7.20    8.80
   4   8   2   11.00    8.30
   4   8   2   11.60    7.40
   4   8   2   22.70    7.40
  -5  -8  -2  185.18   18.90
  -5  -8  -2  144.39   16.30
  -5  -8  -2  174.68   18.00
  -5  -8  -2  199.08   21.80
   5   8   2  190.58   18.90
   5   8   2  174.98   12.90
   5   8   2  148.19   16.70
  -6  -8  -2  112.89   17.40
  -6  -8  -2  137.39   16.80
  -6  -8  -2  123.39   17.30
   6   8   2  152.48   18.70
   6   8   2  100.79   15.10
   6   8   2  138.79   11.60
  -7  -8  -2   29.50   11.80
  -7  -8  -2   39.80   11.30
  -7  -8  -2   -1.20    8.50
   7   8   2   13.50    9.00
   7   8   2   38.20   11.90
  -8  -8  -2   46.50   13.60
  -8  -8  -2   25.20   12.30
  -8  -8  -2   24.70   10.80
   8   8   2   48.40   12.90
   8   8   2   20.30   10.40
  -9  -8  -2  369.26   27.60
  -9  -8  -2  358.36   28.00
  -9  -8  -2  371.96   27.20
   9   8   2  341.07   31.30
   9   8   2  344.27   24.90
 -10  -8  -2  167.78   22.30
 -10  -8  -2  195.68   23.90
 -10  -8  -2  168.68   22.70
  10   8   2  246.48   25.90
  10   8   2  181.18   22.80
   2  -9  -2   37.70   15.50
   2  -9  -2   -2.30   12.70
  -2   9   2   19.40   11.00
  -2   9   2    9.00   11.90
   1  -9  -2  167.08   20.00
   1  -9  -2  167.88   21.70
  -1   9   2  196.08   20.10
  -1   9   2  227.28   24.30
   0  -9  -2   45.80   13.70
   0  -9  -2   35.20   14.10
   0   9   2   24.70    9.00
   0   9   2   25.20   11.20
  -1  -9  -2    5.30   11.40
  -1  -9  -2   11.00    9.30
  -1  -9  -2   30.80   12.00
   1   9   2    6.40    9.70
  -2  -9  -2   37.90   12.10
  -2  -9  -2   13.50   11.60
  -2  -9  -2   42.00   12.30
   2   9   2   43.90    9.80
   2   9   2   25.20    9.90
  -3  -9  -2   75.59   13.40
  -3  -9  -2   90.59   12.60
  -3  -9  -2   70.59   15.00
  -3  -9  -2   52.49   13.00
   3   9   2   74.69   12.60
   3   9   2   66.29   11.90
   3   9   2   45.10    9.90
  -4  -9  -2   -0.50   10.80
  -4  -9  -2   17.50   10.50
  -4  -9  -2    0.00    6.80
  -4  -9  -2   29.50   12.10
   4   9   2   -5.40    7.20
   4   9   2    9.00    7.60
   4   9   2    5.00    6.90
  -5  -9  -2  146.59   17.00
  -5  -9  -2  184.78   19.80
  -5  -9  -2  160.98   18.40
  -5  -9  -2  195.88   22.50
   5   9   2  187.68   14.50
   5   9   2  201.98   20.40
   5   9   2  147.29   17.20
  -6  -9  -2  110.09   17.80
  -6  -9  -2  132.59   18.40
  -6  -9  -2  110.89   16.70
   6   9   2  121.89   17.70
   6   9   2  134.39   18.60
   6   9   2  138.89   15.00
  -7  -9  -2   31.90   12.20
  -7  -9  -2   72.69   14.80
  -7  -9  -2   60.69   13.40
   7   9   2   49.20   13.00
   7   9   2   50.99   12.30
  -8  -9  -2   -4.90    8.70
  -8  -9  -2    5.80    9.60
  -8  -9  -2   11.50   10.60
   8   9   2    2.70    8.00
   8   9   2   -4.10    8.40
  -9  -9  -2   11.30   11.20
  -9  -9  -2   -4.30    9.90
  -9  -9  -2   14.20   11.00
   9   9   2   18.50   11.10
   9   9   2    3.10    9.20
 -10  -9  -2   86.19   17.70
 -10  -9  -2   83.79   18.60
 -10  -9  -2   42.20   14.40
  10   9   2   73.09   16.90
  10   9   2   89.29   18.00
   1 -10  -2  205.58   23.10
   1 -10  -2  143.09   21.80
  -1  10   2  183.88   24.10
   0 -10  -2   28.80   14.30
   0 -10  -2   32.40   13.20
   0  10   2   15.20   10.40
  -1 -10  -2   84.99   16.10
  -1 -10  -2   60.39   15.90
  -1 -10  -2   68.79   14.20
   1  10   2   52.29   13.80
  -2 -10  -2   10.00   11.70
  -2 -10  -2    7.90   10.80
  -2 -10  -2   16.00   11.20
   2  10   2  -12.40    6.70
   2  10   2   -8.20    7.50
  -3 -10  -2   16.50   11.30
  -3 -10  -2    1.20   10.50
  -3 -10  -2   14.50   10.30
   3  10   2    9.30    8.30
   3  10   2    8.40    7.90
  -4 -10  -2  424.56   26.90
  -4 -10  -2  495.75   31.10
  -4 -10  -2  507.25   25.20
  -4 -10  -2  437.06   27.50
   4  10   2  457.85   25.70
   4  10   2  447.66   24.20
   4  10   2  448.66   24.60
  -5 -10  -2    6.90    9.10
  -5 -10  -2    1.60   10.30
  -5 -10  -2    7.80   11.90
  -5 -10  -2   14.30    9.60
   5  10   2    4.00    7.70
   5  10   2   17.10    9.70
   5  10   2    1.50    8.50
  -6 -10  -2  287.67   25.70
  -6 -10  -2  295.17   25.10
  -6 -10  -2  277.87   22.30
  -6 -10  -2  231.78   22.90
   6  10   2  264.67   24.50
   6  10   2  259.47   24.80
  -7 -10  -2    7.60   10.00
  -7 -10  -2   25.30   12.00
  -7 -10  -2   11.30   10.90
   7  10   2   11.30    9.90
   7  10   2   28.90   11.90
  -8 -10  -2    4.00    9.10
  -8 -10  -2   23.70   12.10
  -8 -10  -2   -5.20    8.10
   8  10   2   -7.10    9.30
   8  10   2    0.80   10.00
  -9 -10  -2    0.50   10.10
  -9 -10  -2    3.80    8.70
  -9 -10  -2   -0.90   10.30
   9  10   2   -4.50    9.70
   9  10   2   -0.40    9.80
  -1 -11  -2    2.00   14.70
  -1 -11  -2   24.20   13.00
   1  11   2   26.00   11.20
  -2 -11  -2   15.40   11.30
  -2 -11  -2   -7.50    9.00
  -2 -11  -2    2.60   13.10
   2  11   2    4.70    8.40
  -3 -11  -2    5.40   11.60
  -3 -11  -2   -8.30    9.20
  -3 -11  -2    7.30   10.90
   3  11   2    3.50    8.60
   3  11   2   19.90   10.30
  -4 -11  -2   11.00   10.80
  -4 -11  -2   38.30   14.20
  -4 -11  -2   19.30   11.70
   4  11   2    1.30    9.10
   4  11   2    5.20    8.60
  -5 -11  -2  298.57   22.80
  -5 -11  -2  349.07   28.40
  -5 -11  -2  362.66   25.90
  -5 -11  -2  357.76   26.10
   5  11   2  307.77   23.90
   5  11   2  303.17   23.00
   5  11   2  355.06   22.80
  -6 -11  -2   23.60   11.10
  -6 -11  -2    0.80   11.90
  -6 -11  -2   38.80   14.00
  -6 -11  -2   25.20   11.80
   6  11   2   23.90   11.60
   6  11   2    5.80   10.30
  -7 -11  -2  175.98   21.80
  -7 -11  -2  180.48   21.70
  -7 -11  -2  201.18   25.60
   7  11   2  144.09   20.30
   7  11   2  202.58   24.00
  -8 -11  -2  116.39   19.30
  -8 -11  -2  105.79   18.70
  -8 -11  -2  152.78   23.90
   8  11   2  143.09   21.10
   8  11   2  124.99   19.60
  -4 -12  -2   28.70   11.90
  -4 -12  -2   40.80   15.80
  -4 -12  -2   22.40   13.30
   4  12   2   28.20   11.60
   4  12   2   19.10   11.10
  -5 -12  -2   29.00   12.70
  -5 -12  -2    3.90   13.10
  -5 -12  -2   31.60   13.80
   5  12   2   16.40   10.90
   5  12   2   28.10   10.70
  -6 -12  -2  304.67   29.00
  -6 -12  -2  262.17   26.00
  -6 -12  -2  304.27   32.10
   6  12   2  331.07   26.40
   6  12   2  256.97   26.00
   5  12  -3   13.70   11.80
   5  12  -3    0.80    8.50
  -5 -12   3   12.00   12.90
  -5 -12   3   17.40   12.70
   4  12  -3    7.40   10.00
   4  12  -3   27.30   11.90
  -4 -12   3    1.40   12.00
  -4 -12   3   13.30   12.60
  -4 -12   3   11.80   12.10
   7  11  -3   42.00   14.00
  -7 -11   3   28.00   10.80
  -7 -11   3   27.60   14.50
  -7 -11   3   19.50   13.40
  -7 -11   3   17.50   12.90
   6  11  -3    2.00    9.30
   6  11  -3   12.00    8.30
  -6 -11   3   12.60   10.60
  -6 -11   3   23.90   12.90
  -6 -11   3    8.50   10.30
  -6 -11   3   14.60    9.50
   5  11  -3  139.09   19.10
   5  11  -3  125.29   16.80
  -5 -11   3  139.59   21.20
  -5 -11   3  130.59   16.60
  -5 -11   3   96.39   17.80
   4  11  -3  241.48   24.20
   4  11  -3  254.37   23.10
  -4 -11   3  247.18   25.20
  -4 -11   3  263.57   22.60
  -4 -11   3  220.78   23.60
   3  11  -3  220.68   22.00
   3  11  -3  167.88   19.40
  -3 -11   3  205.98   20.20
  -3 -11   3  129.19   19.30
  -3 -11   3  197.58   22.80
   2  11  -3   18.00    9.20
   2  11  -3    8.70   10.10
  -2 -11   3   12.70   13.20
  -2 -11   3   18.70   11.40
  -2 -11   3   24.40   11.70
  -2 -11   3   10.50   11.60
   1  11  -3   10.60   10.00
  -1 -11   3   14.30   11.60
  -1 -11   3   -4.40    8.70
  -1 -11   3   -8.80   10.70
   0  11  -3   71.69   15.40
   0 -11   3   66.19   17.00
   0 -11   3   56.29   15.10
   8  10  -3   20.20   11.40
   8  10  -3    0.30   10.60
  -8 -10   3   31.00   13.30
  -8 -10   3   45.80   15.40
  -8 -10   3   21.50   13.10
  -8 -10   3   10.40    9.90
   7  10  -3   78.59   15.30
  -7 -10   3   79.99   17.70
  -7 -10   3   87.39   18.00
  -7 -10   3   53.29   12.50
  -7 -10   3   99.29   20.50
   6  10  -3   32.80   10.00
   6  10  -3   17.40    9.90
  -6 -10   3   15.20   11.10
  -6 -10   3   49.10   11.90
  -6 -10   3   21.90   12.50
  -6 -10   3   39.30   13.80
   5  10  -3  237.58   20.70
   5  10  -3  180.98   20.00
  -5 -10   3  201.08   19.00
  -5 -10   3  168.38   19.80
  -5 -10   3  230.98   24.30
  -5 -10   3  148.09   20.60
   4  10  -3  105.99   14.80
   4  10  -3   82.49   13.90
  -4 -10   3  110.99   17.00
  -4 -10   3   83.79   16.30
  -4 -10   3  104.99   14.80
  -4 -10   3   89.39   15.80
   3  10  -3   55.79   13.10
   3  10  -3   61.29   12.50
  -3 -10   3   56.09   12.50
  -3 -10   3   39.50   12.30
  -3 -10   3   40.30   13.20
  -3 -10   3   58.49   14.00
   2  10  -3  157.18   17.40
   2  10  -3  164.18   18.80
  -2 -10   3  152.48   19.90
  -2 -10   3  117.29   15.90
  -2 -10   3  125.29   17.20
  -2 -10   3  171.88   20.30
   1  10  -3   97.49   16.60
  -1 -10   3   98.19   15.90
  -1 -10   3  124.59   19.20
  -1 -10   3  109.59   16.10
  -1 -10   3  129.39   18.30
   0  10  -3  145.29   19.00
   0 -10   3  106.09   16.30
   0 -10   3  121.19   16.70
   0 -10   3  137.09   20.20
  -1  10  -3   12.80   11.50
   1 -10   3   10.00   12.80
   1 -10   3   25.10   14.30
   9   9  -3   98.69   20.70
   9   9  -3   98.69   19.60
  -9  -9   3  116.19   22.40
  -9  -9   3  106.59   18.50
  -9  -9   3   65.39   17.30
  -9  -9   3  122.99   22.90
   8   9  -3   90.29   16.10
   8   9  -3  103.99   18.00
  -8  -9   3   87.29   16.50
  -8  -9   3  101.99   16.30
  -8  -9   3  115.19   20.40
  -8  -9   3  100.79   19.90
   7   9  -3   23.10    9.50
   7   9  -3   37.20    9.30
  -7  -9   3   29.00   12.80
  -7  -9   3   31.90   13.80
  -7  -9   3   21.70   11.40
  -7  -9   3   19.10   10.00
   6   9  -3    7.40    7.20
   6   9  -3   -7.90    7.70
  -6  -9   3   -0.10    9.70
  -6  -9   3   -4.90    8.50
  -6  -9   3   12.00   10.80
  -6  -9   3  -11.50    6.60
   5   9  -3   -0.60    7.60
   5   9  -3    7.80    7.90
  -5  -9   3   36.00    9.90
  -5  -9   3   18.60   11.20
  -5  -9   3    8.80   10.70
  -5  -9   3    6.40    9.20
   4   9  -3   19.00    8.20
   4   9  -3   36.00   10.70
  -4  -9   3   15.60   10.90
  -4  -9   3   37.00   11.70
  -4  -9   3   16.50   10.60
  -4  -9   3   29.20    9.90
   3   9  -3   34.80   11.60
   3   9  -3   49.20   12.10
  -3  -9   3   36.90   12.10
  -3  -9   3   74.39   15.30
  -3  -9   3   30.10   12.80
  -3  -9   3   41.50   13.50
   2   9  -3  154.58   16.80
   2   9  -3  140.59   15.90
  -2  -9   3  175.38   19.90
  -2  -9   3  184.88   17.50
  -2  -9   3  145.89   17.90
  -2  -9   3  196.28   21.30
   1   9  -3  203.88   17.90
   1   9  -3  201.08   19.40
  -1  -9   3  193.68   20.40
  -1  -9   3  181.78   18.20
  -1  -9   3  176.78   18.60
  -1  -9   3  188.88   20.20
   0   9  -3   74.99   14.60
   0   9  -3  129.09   14.40
   0  -9   3   94.29   15.80
   0  -9   3   88.69   15.70
   0  -9   3   96.39   14.40
   0  -9   3   88.79   14.10
  -1   9  -3  363.26   22.10
  -1   9  -3  361.26   25.20
   1  -9   3  373.06   26.40
   1  -9   3  417.76   23.50
   1  -9   3  385.06   25.70
  -2   9  -3   90.49   15.60
  -2   9  -3   76.29   15.80
   2  -9   3   83.29   17.80
   2  -9   3   49.50   16.10
  -3   9  -3    9.00   11.50
  -3   9  -3   16.50   10.60
   3  -9   3    0.50   15.50
   3  -9   3    1.40   12.70
   9   8  -3   13.70   11.80
   9   8  -3   -3.10    9.40
  -9  -8   3    7.00   11.10
  -9  -8   3    5.70   10.90
  -9  -8   3    7.60   11.70
  -9  -8   3    4.90    9.90
   8   8  -3  145.99   19.90
   8   8  -3  172.58   20.00
  -8  -8   3  133.89   20.20
  -8  -8   3  204.88   24.30
  -8  -8   3  128.29   17.70
  -8  -8   3  167.68   21.90
   7   8  -3   11.10    6.80
   7   8  -3   10.00    9.10
  -7  -8   3    9.50    9.70
  -7  -8   3   -6.90    9.00
  -7  -8   3    7.40    8.30
  -7  -8   3   16.90   10.70
   6   8  -3   60.59   10.40
   6   8  -3   71.59   13.30
  -6  -8   3   62.69   14.30
  -6  -8   3   84.49   13.10
  -6  -8   3   64.89   13.80
  -6  -8   3   86.09   16.10
   5   8  -3  421.56   20.70
   5   8  -3  419.66   24.80
  -5  -8   3  398.26   25.00
  -5  -8   3  450.05   28.20
  -5  -8   3  426.46   25.20
  -5  -8   3  441.36   21.70
   4   8  -3  151.88   17.50
   4   8  -3  127.69   14.20
  -4  -8   3  180.18   18.60
  -4  -8   3  142.19   14.70
  -4  -8   3  128.19   16.80
  -4  -8   3  153.18   19.00
   3   8  -3  136.99   14.90
   3   8  -3  131.39   15.50
  -3  -8   3  135.39   15.90
  -3  -8   3  161.28   19.50
  -3  -8   3  124.99   16.30
  -3  -8   3  132.59   13.80
   2   8  -3   27.00    9.70
   2   8  -3   29.80    6.00
   2   8  -3   37.70    8.80
  -2  -8   3   29.20   11.30
  -2  -8   3   34.10   10.30
  -2  -8   3   46.40   11.40
  -2  -8   3   30.40    9.80
  -2  -8   3   42.40   10.30
   1   8  -3   35.40    8.90
   1   8  -3   69.09   12.00
   1   8  -3   41.10    7.90
  -1  -8   3   36.00   12.30
  -1  -8   3   31.00   10.60
  -1  -8   3   45.20   11.00
  -1  -8   3   37.10   10.60
   0   8  -3  216.98   15.00
   0   8  -3  194.08   18.30
   0   8  -3  198.78   14.50
   0  -8   3  247.48   20.30
   0  -8   3  194.98   16.70
   0  -8   3  198.88   18.10
   0  -8   3  201.98   18.30
  -1   8  -3   -7.10    7.60
  -1   8  -3    6.20    7.20
   1  -8   3   16.40   12.60
   1  -8   3   -0.90    9.90
   1  -8   3   -0.80    8.00
  -2   8  -3   11.40    8.20
  -2   8  -3  -10.00    8.60
   2  -8   3    3.80   11.60
   2  -8   3    5.30    8.50
   2  -8   3   -0.20   11.40
  -3   8  -3   80.49   14.70
  -3   8  -3   48.70   12.80
   3  -8   3   38.80   14.60
   3  -8   3   73.79   17.40
  -4   8  -3  196.28   22.10
  -4   8  -3  213.38   23.80
   4  -8   3  167.48   22.30
   4  -8   3  127.19   22.90
   9   7  -3   34.70   12.30
   9   7  -3   38.40   13.60
  -9  -7   3   31.80   13.30
  -9  -7   3   31.60   13.90
  -9  -7   3   25.60   13.00
  -9  -7   3   41.90   14.30
   8   7  -3   34.40   11.70
   8   7  -3   28.40   10.80
  -8  -7   3   32.30   11.30
  -8  -7   3   38.70   12.70
  -8  -7   3   36.80   12.60
  -8  -7   3   30.90   11.80
   7   7  -3  177.28   14.80
   7   7  -3  160.68   18.20
  -7  -7   3  164.28   19.90
  -7  -7   3  158.28   19.70
  -7  -7   3  251.27   24.50
  -7  -7   3  179.28   18.50
   6   7  -3   -0.70    6.10
   6   7  -3   -5.00    6.70
  -6  -7   3  -11.70    6.40
  -6  -7   3   -5.10    8.50
  -6  -7   3   -2.40    7.60
  -6  -7   3   14.20    8.50
   5   7  -3  189.08   18.30
   5   7  -3  195.98   14.70
  -5  -7   3  228.48   19.90
  -5  -7   3  170.28   15.50
  -5  -7   3  172.28   17.40
  -5  -7   3  234.18   20.00
  -5  -7   3  210.18   19.70
   4   7  -3  462.05   23.40
   4   7  -3  412.36   19.70
  -4  -7   3  425.96   24.30
  -4  -7   3  454.75   23.80
  -4  -7   3  414.26   22.40
  -4  -7   3  391.16   23.20
  -4  -7   3  431.96   19.40
   3   7  -3   14.10    6.90
   3   7  -3   39.40    8.80
   3   7  -3   33.40    4.70
  -3  -7   3   32.70    8.00
  -3  -7   3   36.80   10.20
  -3  -7   3   33.20    9.40
  -3  -7   3   39.80    9.50
  -3  -7   3   37.20   10.40
   2   7  -3    5.40    3.90
   2   7  -3    1.10    6.50
   2   7  -3    5.80    5.60
  -2  -7   3    1.30    5.70
  -2  -7   3    7.90    7.40
  -2  -7   3    4.50    7.70
  -2  -7   3    9.70    6.80
   1   7  -3   35.70    6.50
   1   7  -3   28.70    8.60
   1   7  -3   24.90    7.30
  -1  -7   3   39.40   10.00
  -1  -7   3   39.60    8.80
  -1  -7   3   41.20    9.50
  -1  -7   3   18.20    9.80
  -1  -7   3   30.10    8.80
   0   7  -3   40.30    8.10
   0   7  -3   37.00    7.90
   0   7  -3   52.99   10.30
   0  -7   3   44.00    9.70
   0  -7   3   65.69    9.80
   0  -7   3   67.89   11.30
   0  -7   3   50.59   11.40
   0  -7   3   54.19   11.10
  -1   7  -3    7.00    7.30
  -1   7  -3   -3.90    4.60
  -1   7  -3    2.40    5.70
   1  -7   3   -2.80    5.60
   1  -7   3   -7.50    8.70
   1  -7   3   -0.70    5.90
   1  -7   3   19.50    8.30
   1  -7   3   -0.40   10.90
  -2   7  -3    3.00    7.80
  -2   7  -3  -10.80    5.90
   2  -7   3   -8.90   10.20
   2  -7   3  -20.60    9.20
   2  -7   3   -3.60    7.40
  -3   7  -3   24.50   10.20
  -3   7  -3   14.40   10.40
   3  -7   3   -9.20   11.00
   3  -7   3  -12.70   11.70
   3  -7   3   10.10    8.40
  -4   7  -3   29.70   11.00
  -4   7  -3   26.70   11.50
   4  -7   3    9.60   13.60
   4  -7   3    1.60   11.60
  -5   7  -3   57.99   15.20
  -5   7  -3   79.09   15.60
   5  -7   3   29.80   15.60
   5  -7   3    4.60   16.00
  10   6  -3   -2.40    9.20
  10   6  -3  -15.30    7.60
  10   6  -3   -0.60    9.50
 -10  -6   3   -5.60    9.50
 -10  -6   3   19.40   11.10
   9   6  -3    5.70    9.20
   9   6  -3   -4.30    9.90
  -9  -6   3   -2.40    8.70
  -9  -6   3   -3.00    9.70
  -9  -6   3   14.90   10.70
   8   6  -3  -13.40    6.40
   8   6  -3   -1.30    8.70
  -8  -6   3    5.90    9.70
  -8  -6   3    1.10    9.20
  -8  -6   3   -2.50    7.40
  -8  -6   3   -8.80    9.50
   7   6  -3   -9.60    6.70
   7   6  -3    4.90    6.40
   7   6  -3   11.50    9.00
  -7  -6   3   15.90   10.30
  -7  -6   3    3.60    9.20
  -7  -6   3    7.40    8.00
  -7  -6   3    5.90    9.20
   6   6  -3   74.99    8.70
   6   6  -3   70.39   10.20
   6   6  -3  102.79   14.40
  -6  -6   3   88.39   14.40
  -6  -6   3   75.79   14.60
  -6  -6   3  103.59   13.80
  -6  -6   3   80.09   13.40
   5   6  -3  280.47   11.90
   5   6  -3  308.87   19.10
   5   6  -3  290.97   15.60
  -5  -6   3  286.87   19.50
  -5  -6   3  322.07   21.00
  -5  -6   3  317.27   19.60
  -5  -6   3  295.77   17.10
  -5  -6   3  305.47   20.80
   4   6  -3  308.87   15.60
   4   6  -3  317.67   11.60
   4   6  -3  344.87   19.00
  -4  -6   3  287.37   19.10
  -4  -6   3  380.26   19.80
  -4  -6   3  345.27   16.40
  -4  -6   3  291.57   17.40
   3   6  -3 1254.77   33.20
   3   6  -3 1200.28   24.90
   3   6  -3 1207.38   35.60
  -3  -6   3 1182.78   36.40
  -3  -6   3 1224.08   30.80
  -3  -6   3 1199.78   38.00
  -3  -6   3 1190.98   35.40
  -3  -6   3 1205.28   35.20
   2   6  -3  383.66   18.00
   2   6  -3  349.77   12.50
   2   6  -3  362.46   17.80
  -2  -6   3  375.46   19.70
  -2  -6   3  358.06   17.80
  -2  -6   3  367.56   19.10
  -2  -6   3  347.17   18.60
  -2  -6   3  348.57   15.90
   1   6  -3   25.10    5.20
   1   6  -3   19.20    6.40
  -1  -6   3   33.50    7.30
  -1  -6   3   25.20    7.30
  -1  -6   3   38.80    8.60
  -1  -6   3   22.60    8.00
  -1  -6   3   37.60    8.70
   0   6  -3   70.49    9.70
   0   6  -3   55.29   10.30
   0  -6   3   79.69   11.00
   0  -6   3   69.19   11.30
   0  -6   3   42.80    9.90
   0  -6   3   68.69   11.40
   0  -6   3   40.50   11.90
  -1   6  -3   31.10    7.40
  -1   6  -3   48.40    7.20
  -1   6  -3   33.70    9.30
   1  -6   3   39.80   11.40
   1  -6   3   37.70    9.30
   1  -6   3   37.90    6.80
   1  -6   3   45.60    8.00
   1  -6   3   31.30    8.50
  -2   6  -3   21.10    5.10
  -2   6  -3   32.20    9.00
  -2   6  -3   25.00    8.80
   2  -6   3   29.20   11.50
   2  -6   3   35.40   10.70
   2  -6   3   42.10    7.30
   2  -6   3   36.60    9.50
   2  -6   3   33.50    6.60
  -3   6  -3   31.60   10.50
  -3   6  -3   39.70   10.50
   3  -6   3   34.70   10.20
   3  -6   3   19.80   12.60
   3  -6   3   44.60   11.50
  -4   6  -3    4.40    7.70
  -4   6  -3    1.00    8.50
   4  -6   3   -4.40    7.80
   4  -6   3  -16.60    9.30
   4  -6   3   -0.10   10.40
  -5   6  -3  103.89   16.40
  -5   6  -3  127.49   18.90
   5  -6   3   77.49   16.40
   5  -6   3   95.09   17.80
  -6   6  -3  238.58   26.40
  -6   6  -3  211.38   23.50
   6  -6   3  207.28   24.10
   6  -6   3  220.48   25.90
  10   5  -3   30.80   11.70
  10   5  -3   44.30   14.10
 -10  -5   3   24.10   13.30
 -10  -5   3   52.99   16.00
   9   5  -3    2.20    8.90
   9   5  -3    7.70    9.40
   9   5  -3    4.10    9.00
  -9  -5   3   -1.90    8.30
  -9  -5   3    3.90    9.30
  -9  -5   3   11.40   10.10
   8   5  -3   65.99   12.50
   8   5  -3  104.99   16.70
  -8  -5   3   47.20   12.10
  -8  -5   3   87.99   16.50
  -8  -5   3   90.39   16.00
   7   5  -3  404.26   18.60
   7   5  -3  425.06   25.00
   7   5  -3  385.96   18.70
   7   5  -3  449.56   24.30
  -7  -5   3  405.96   25.40
  -7  -5   3  430.96   21.00
  -7  -5   3  417.46   23.70
  -7  -5   3  448.36   25.20
  -7  -5   3  440.76   26.00
   6   5  -3  258.97   14.80
   6   5  -3  275.97   13.90
   6   5  -3  251.57   17.60
  -6  -5   3  310.57   20.70
  -6  -5   3  251.77   17.20
  -6  -5   3  265.87   19.30
  -6  -5   3  267.57   15.60
  -6  -5   3  270.77   19.80
  -6  -5   3  238.58   17.60
   5   5  -3   45.10    9.80
   5   5  -3   90.69   10.00
   5   5  -3  105.49    8.60
  -5  -5   3   94.89   13.10
  -5  -5   3  103.69   14.20
  -5  -5   3  101.69   13.10
  -5  -5   3   78.39   11.70
  -5  -5   3   99.19   11.80
   4   5  -3  113.59    8.10
   4   5  -3  121.79   10.90
   4   5  -3  118.99   13.00
  -4  -5   3  108.49   13.30
  -4  -5   3  113.39   13.10
  -4  -5   3  121.09   13.00
  -4  -5   3   95.29   12.90
  -4  -5   3  111.09   10.70
   3   5  -3  184.38   11.60
   3   5  -3  173.88    9.10
  -3  -5   3  178.78   14.40
  -3  -5   3  187.38   11.60
  -3  -5   3  192.68   13.70
  -3  -5   3  175.58   14.20
  -3  -5   3  189.98   14.20
   2   5  -3  621.64   16.90
   2   5  -3  612.54   21.50
  -2  -5   3  668.03   24.00
  -2  -5   3  616.04   19.00
  -2  -5   3  603.64   24.20
  -2  -5   3  630.24   23.10
  -2  -5   3  640.04   22.80
   1   5  -3  119.39    8.60
   1   5  -3  126.49   12.10
  -1  -5   3  105.89   11.80
  -1  -5   3  126.39   13.00
  -1  -5   3  122.49   10.00
  -1  -5   3  138.59   13.20
  -1  -5   3  112.09   11.70
   0   5  -3   53.09    8.40
   0   5  -3   54.49    7.40
   0  -5   3   56.39    8.20
   0  -5   3   63.59    9.10
   0  -5   3   33.30    8.10
   0  -5   3   68.29   10.70
   0  -5   3   59.59    8.40
  -1   5  -3  192.38   13.30
  -1   5  -3  167.38   11.80
   1  -5   3  164.48   10.80
   1  -5   3  183.38   14.60
   1  -5   3  179.88   11.70
   1  -5   3  180.48   13.30
   1  -5   3  175.28   12.50
  -2   5  -3  407.16   20.10
  -2   5  -3  428.36   19.60
   2  -5   3  435.46   15.80
   2  -5   3  415.26   15.00
   2  -5   3  435.66   19.90
   2  -5   3  419.96   19.00
   2  -5   3  425.56   22.60
  -3   5  -3   95.69   12.30
  -3   5  -3  117.59   13.40
   3  -5   3  112.89   13.10
   3  -5   3   88.29   11.80
   3  -5   3  103.69   14.80
  -4   5  -3   18.00    9.30
  -4   5  -3   -4.90    6.90
   4  -5   3   -4.50    8.60
   4  -5   3   -3.20    8.20
   4  -5   3    6.40    7.80
  -5   5  -3   77.29   14.10
  -5   5  -3   86.49   15.00
   5  -5   3   62.59   14.90
   5  -5   3   63.09   11.70
   5  -5   3   75.89   14.70
  -6   5  -3   27.60   12.30
  -6   5  -3   10.90    9.80
   6  -5   3   20.00   11.40
   6  -5   3   21.30   12.80
  -7   5  -3   88.09   17.20
  -7   5  -3   76.59   15.30
   7  -5   3   80.89   18.70
   7  -5   3   75.19   16.70
  10   4  -3   76.79   16.30
  10   4  -3   64.19   15.00
  10   4  -3   74.39   16.10
 -10  -4   3   53.59   15.90
   9   4  -3  107.99   18.00
   9   4  -3   77.59   15.70
   9   4  -3  114.19   15.70
  -9  -4   3  115.09   16.70
  -9  -4   3  106.99   18.30
  -9  -4   3   83.09   16.60
   8   4  -3  273.37   22.30
   8   4  -3  258.97   23.40
   8   4  -3  259.87   19.20
   8   4  -3  243.58   22.60
  -8  -4   3  244.98   24.30
  -8  -4   3  267.87   20.60
  -8  -4   3  257.27   20.60
  -8  -4   3  245.98   19.70
   7   4  -3  470.55   26.00
   7   4  -3  486.95   20.90
   7   4  -3  458.85   23.50
  -7  -4   3  506.15   26.60
  -7  -4   3  533.55   23.00
  -7  -4   3  517.95   24.30
  -7  -4   3  494.75   25.30
  -7  -4   3  525.75   25.90
  -7  -4   3  458.05   26.70
   6   4  -3   33.70    7.40
   6   4  -3   26.00    7.50
   6   4  -3   54.19   11.30
  -6  -4   3   13.70    8.10
  -6  -4   3   33.20    9.90
  -6  -4   3   26.30    8.70
  -6  -4   3   32.60    8.50
  -6  -4   3   29.80    9.10
  -6  -4   3   38.10    9.10
   5   4  -3  249.88   13.30
   5   4  -3  252.67   16.00
   5   4  -3  271.47   13.30
  -5  -4   3  237.98   14.90
  -5  -4   3  256.67   16.90
  -5  -4   3  270.37   17.60
  -5  -4   3  290.17   18.20
  -5  -4   3  276.47   16.90
  -5  -4   3  293.17   14.70
   4   4  -3   61.79    7.10
   4   4  -3   64.89    8.30
  -4  -4   3   67.99   10.70
  -4  -4   3   82.29   10.10
  -4  -4   3   77.79   10.90
  -4  -4   3   91.09   11.90
  -4  -4   3   68.19    8.70
   3   4  -3   41.50    5.90
   3   4  -3   42.00    7.40
  -3  -4   3   56.79   10.00
  -3  -4   3   42.60    6.70
  -3  -4   3   29.20    7.50
  -3  -4   3   52.19    8.90
  -3  -4   3   40.60    9.50
   2   4  -3  230.58   10.70
   2   4  -3  247.58   13.60
  -2  -4   3  229.68   14.80
  -2  -4   3  194.48   14.80
  -2  -4   3  224.28   10.90
  -2  -4   3  212.68   13.80
  -2  -4   3  231.88   13.90
   1   4  -3 1155.98   29.20
   1   4  -3 1129.29   25.60
  -1  -4   3 1218.28   32.30
  -1  -4   3 1159.78   25.00
  -1  -4   3 1119.09   30.40
  -1  -4   3 1185.58   29.60
  -1  -4   3 1159.38   30.40
   0   4  -3  566.24   19.90
   0   4  -3  611.14   18.40
   0  -4   3  593.54   21.20
   0  -4   3  558.14   20.30
   0  -4   3  579.04   17.40
   0  -4   3  576.14   20.50
   0  -4   3  579.94   19.50
  -1   4  -3  107.69   10.60
  -1   4  -3  108.89    9.90
   1  -4   3  103.49    9.10
   1  -4   3   97.09   10.10
   1  -4   3   99.99    9.40
   1  -4   3  101.69    9.40
   1  -4   3  102.19   12.00
  -2   4  -3  156.28   12.50
  -2   4  -3  178.48   12.10
  -2   4  -3  165.58    9.70
   2  -4   3  168.18   14.70
   2  -4   3  162.18   12.50
   2  -4   3  172.68    9.60
   2  -4   3  170.28   11.60
   2  -4   3  168.08    9.40
  -3   4  -3  585.64   15.60
  -3   4  -3  594.74   23.60
  -3   4  -3  597.44   22.70
   3  -4   3  595.34   16.30
   3  -4   3  606.14   22.40
   3  -4   3  604.04   24.20
   3  -4   3  577.04   22.20
  -4   4  -3   21.30    7.40
  -4   4  -3   43.30   10.60
   4  -4   3   27.00    9.80
   4  -4   3   22.80    8.10
   4  -4   3   25.90    9.00
  -5   4  -3   -3.60    7.10
  -5   4  -3    2.20    7.00
   5  -4   3   12.30    9.00
   5  -4   3    4.20    8.70
   5  -4   3    6.00    7.90
  -6   4  -3   67.69   14.20
  -6   4  -3   60.69   11.90
   6  -4   3   41.50   13.00
   6  -4   3   65.89   12.20
   6  -4   3   61.89   14.20
  -7   4  -3    8.70    8.90
  -7   4  -3   23.80   11.80
   7  -4   3   20.40   11.80
   7  -4   3   24.70   11.50
   9   3  -3   29.80   12.40
   9   3  -3   35.30   12.20
   9   3  -3   24.60   11.60
  -9  -3   3   31.60   12.90
  -9  -3   3   29.00   12.80
   8   3  -3   19.70   10.20
   8   3  -3    6.80    8.20
   8   3  -3    6.90    7.30
   8   3  -3    7.80    8.30
   8   3  -3    4.00    7.80
  -8  -3   3    5.90    9.50
  -8  -3   3    4.30    4.00
  -8  -3   3  -15.40    6.70
  -8  -3   3    2.70    9.50
   7   3  -3  165.48   17.60
   7   3  -3   99.59   12.60
   7   3  -3  144.29   16.60
  -7  -3   3  169.08   18.10
  -7  -3   3  147.39   15.30
  -7  -3   3  124.79   16.30
  -7  -3   3  168.08   15.40
  -7  -3   3  145.29   16.10
   6   3  -3  288.57   20.80
   6   3  -3  282.77   16.70
   6   3  -3  294.77   19.00
   6   3  -3  288.47   20.30
  -6  -3   3  303.17   22.10
  -6  -3   3  293.77   19.40
  -6  -3   3  302.97   18.50
  -6  -3   3  311.87   20.70
  -6  -3   3  284.87   19.60
  -6  -3   3  302.07   19.90
  -6  -3   3  286.67   19.20
   5   3  -3   40.50    8.20
   5   3  -3   42.70    7.20
  -5  -3   3   43.40    9.20
  -5  -3   3   60.99    9.30
  -5  -3   3   62.49    9.20
  -5  -3   3   52.19    9.40
  -5  -3   3   51.59    9.50
  -5  -3   3   68.59    9.40
  -5  -3   3   49.30    8.70
   4   3  -3  428.26   16.50
   4   3  -3  415.06   15.70
  -4  -3   3  446.36   19.60
  -4  -3   3  387.66   19.00
  -4  -3   3  388.06   17.60
  -4  -3   3  415.26   17.20
  -4  -3   3  399.16   17.30
  -4  -3   3  398.26   17.90
  -4  -3   3  430.86   17.50
   3   3  -3  204.08   11.80
   3   3  -3  205.08   11.40
  -3  -3   3  200.38   11.80
  -3  -3   3  186.88   13.10
  -3  -3   3  209.58   14.70
  -3  -3   3  209.28   13.90
  -3  -3   3  218.58   14.90
   2   3  -3 2103.19   41.80
   2   3  -3 2097.39   38.80
  -2  -3   3 2029.20   45.60
  -2  -3   3 2128.29   41.40
  -2  -3   3 2054.19   43.80
  -2  -3   3 2065.89   37.90
  -2  -3   3 2119.89   44.50
   1   3  -3  708.43   20.40
   1   3  -3  731.23   18.30
  -1  -3   3  739.83   16.00
  -1  -3   3  698.93   21.00
  -1  -3   3  696.03   19.20
  -1  -3   3  706.63   21.00
  -1  -3   3  755.52   23.00
   0   3  -3  451.05   15.30
   0   3  -3  477.65   16.90
   0  -3   3  426.36   13.00
   0  -3   3  451.85   16.70
   0  -3   3  500.05   17.90
   0  -3   3  505.75   17.90
   0  -3   3  517.65   17.40
  -1   3  -3 1814.62   38.80
  -1   3  -3 1831.62   38.00
   1  -3   3 1835.72   34.70
   1  -3   3 1809.72   39.20
   1  -3   3 1774.02   37.00
   1  -3   3 1815.82   38.70
   1  -3   3 1795.72   36.70
  -2   3  -3   43.30    7.80
  -2   3  -3   35.70    5.70
  -2   3  -3   39.40    7.30
   2  -3   3   45.10    7.10
   2  -3   3   42.90    8.30
   2  -3   3   44.50    6.00
   2  -3   3   32.70    7.20
  -3   3  -3  294.57   10.50
  -3   3  -3  327.87   16.60
  -3   3  -3  320.57   15.70
   3  -3   3  319.57   16.70
   3  -3   3  306.97   15.30
   3  -3   3  301.97   11.50
   3  -3   3  300.37   15.80
  -4   3  -3  609.24   22.70
  -4   3  -3  649.54   25.40
   4  -3   3  614.84   22.70
   4  -3   3  589.34   15.50
   4  -3   3  605.84   23.20
   4  -3   3  599.14   24.10
  -5   3  -3   15.80    7.10
  -5   3  -3    3.30    7.60
   5  -3   3   18.70    8.20
   5  -3   3   -1.60    7.20
   5  -3   3    7.70    8.20
  -6   3  -3   10.30    8.30
  -6   3  -3    3.40    7.50
   6  -3   3    1.30    8.30
   6  -3   3    2.30    8.10
   6  -3   3   -9.50    6.90
  -7   3  -3    6.90    8.10
  -7   3  -3   28.00   11.40
   7  -3   3   19.10    9.80
   7  -3   3    5.90   10.20
   7  -3   3   14.70   11.20
  -8   3  -3    2.40    9.20
   8  -3   3    8.70   11.10
   8  -3   3   -5.30    8.80
   9   2  -3   -6.70    8.30
   9   2  -3   12.20    9.90
  -9  -2   3    8.90   11.30
  -9  -2   3    1.10   10.90
   8   2  -3  159.98   17.80
   8   2  -3  166.28   19.20
   8   2  -3  183.58   20.30
  -8  -2   3  152.68   19.20
  -8  -2   3  162.08   17.30
  -8  -2   3  194.28   21.50
   7   2  -3   79.29   13.10
   7   2  -3   96.99   13.00
   7   2  -3  108.39   14.00
   7   2  -3  111.89   12.60
   7   2  -3  103.09   15.20
  -7  -2   3   97.59   14.20
  -7  -2   3  103.39   12.80
  -7  -2   3  102.49   13.60
  -7  -2   3  117.39   16.60
   6   2  -3  145.49   14.90
   6   2  -3  133.69   14.00
   6   2  -3  135.49   15.00
   6   2  -3  148.59   13.70
   6   2  -3  138.99   14.70
  -6  -2   3  135.29   13.20
  -6  -2   3  140.99   13.80
  -6  -2   3  136.59   16.00
  -6  -2   3  133.69   15.10
  -6  -2   3  133.19   15.00
  -6  -2   3  135.89   14.10
   5   2  -3   79.49   10.30
   5   2  -3   84.99   10.00
   5   2  -3   61.09    9.50
  -5  -2   3   80.09   10.40
  -5  -2   3   64.19   10.20
  -5  -2   3   64.99    9.50
  -5  -2   3   65.29    9.70
  -5  -2   3   78.09    9.90
  -5  -2   3   73.89   10.40
  -5  -2   3   62.29    8.60
  -4  -2   3  804.02   24.70
  -4  -2   3  784.92   25.00
  -4  -2   3  815.62   25.50
  -4  -2   3  784.32   25.40
  -4  -2   3  749.53   24.70
  -4  -2   3  808.12   26.00
  -4  -2   3  788.52   24.20
   3   2  -3  469.85   16.60
  -3  -2   3  480.25   18.40
  -3  -2   3  497.65   18.50
  -3  -2   3  443.16   17.50
  -3  -2   3  460.35   16.40
  -3  -2   3  464.65   17.50
  -3  -2   3  474.85   18.90
  -3  -2   3  469.65   17.70
   2   2  -3  386.36   14.30
   2   2  -3  428.76   13.80
  -2  -2   3  426.26   15.30
  -2  -2   3  425.36   15.60
  -2  -2   3  437.26   16.50
  -2  -2   3  435.06   14.30
  -2  -2   3  453.75   16.10
  -2  -2   3  432.46   12.90
   1   2  -3  497.15   10.40
   1   2  -3  471.65   13.80
   1   2  -3  478.85   15.10
  -1  -2   3  504.05   16.70
  -1  -2   3  485.45   10.80
  -1  -2   3  478.25   15.30
  -1  -2   3  480.35   13.20
  -1  -2   3  497.15   16.00
   0   2  -3 1197.48   26.20
   0   2  -3 1172.88   19.70
   0   2  -3 1179.48   27.80
   0   2  -3 1198.88   25.50
   0  -2   3 1188.98   27.40
   0  -2   3 1176.08   24.00
   0  -2   3 1197.68   26.80
   0  -2   3 1177.08   26.40
   0  -2   3 1178.48   19.90
  -1   2  -3   71.69    6.70
  -1   2  -3   65.69    6.80
  -1   2  -3   62.59    6.70
   1  -2   3   66.09    6.70
   1  -2   3   61.79    5.00
   1  -2   3   65.19    7.20
   1  -2   3   59.49    6.10
  -2   2  -3    7.50    4.80
  -2   2  -3   15.10    5.60
  -2   2  -3   13.20    4.50
   2  -2   3    7.70    4.50
   2  -2   3   18.70    6.10
   2  -2   3    5.80    4.20
   2  -2   3   12.50    5.60
  -3   2  -3   42.90    7.80
  -3   2  -3   48.10    7.40
  -3   2  -3   50.49    5.50
   3  -2   3   50.29    8.20
   3  -2   3   44.50    7.60
   3  -2   3   51.49    8.00
   3  -2   3   44.00    5.80
  -4   2  -3   46.90    3.70
  -4   2  -3   52.29    4.20
  -4   2  -3   37.60    8.30
  -4   2  -3   41.30    7.40
   4  -2   3   44.80    8.90
   4  -2   3   54.99    5.80
   4  -2   3   56.59    8.90
   4  -2   3   48.20    8.20
  -5   2  -3   26.00    8.00
  -5   2  -3   26.40    6.70
   5  -2   3   20.80    4.30
   5  -2   3   26.80    7.90
   5  -2   3   11.30    7.10
   5  -2   3   28.10    8.10
  -6   2  -3  365.16   22.60
  -6   2  -3  371.56   19.20
   6  -2   3  351.16   21.20
   6  -2   3  388.46   20.80
   6  -2   3  401.06   21.90
  -7   2  -3  122.59   14.00
  -7   2  -3  128.19   17.20
   7  -2   3  119.39   15.40
   7  -2   3   96.69   14.80
   7  -2   3  121.79   16.40
  -8   2  -3    3.40    9.20
   8  -2   3   20.70   10.50
   8  -2   3    3.30   10.10
   8  -2   3   -3.60    8.00
  -9   2  -3    5.40   11.60
   9  -2   3    4.70   11.00
   9  -2   3   14.50   11.50
   9   1  -3   13.80   12.10
   9   1  -3   22.50   11.50
  -9  -1   3   13.90   12.10
   8   1  -3   39.70   12.70
   8   1  -3   29.20    9.90
  -8  -1   3   26.00   10.80
  -8  -1   3   15.30   11.90
   7   1  -3  790.82   30.10
   7   1  -3  814.42   33.00
   7   1  -3  839.22   33.40
  -7  -1   3  855.41   32.60
  -7  -1   3  827.52   33.70
  -7  -1   3  788.92   34.50
   6   1  -3  376.36   20.30
   6   1  -3  375.26   18.60
   6   1  -3  422.56   18.20
   6   1  -3  411.56   22.10
   6   1  -3  388.86   19.40
  -6  -1   3  394.36   22.30
  -6  -1   3  389.86   22.80
  -6  -1   3  367.86   20.80
   5   1  -3    3.20    4.50
   5   1  -3    2.40    5.20
   5   1  -3    1.90    5.00
   5   1  -3    2.10    4.80
   5   1  -3    1.30    5.50
  -5  -1   3    6.50    6.50
  -5  -1   3    0.20    4.30
  -5  -1   3    2.50    6.00
  -5  -1   3    0.10    2.20
  -5  -1   3    3.90    6.00
   4   1  -3  540.95   20.00
   4   1  -3  505.05   19.70
   4   1  -3  512.85   18.80
   4   1  -3  522.55   19.50
  -4  -1   3  522.75   20.60
  -4  -1   3  512.45   18.90
  -4  -1   3  497.15   19.70
  -4  -1   3  506.55   18.10
  -4  -1   3  520.95   20.30
  -4  -1   3  506.35   18.70
  -4  -1   3  515.55   21.50
   3   1  -3  153.68   10.60
   3   1  -3  171.18   12.30
   3   1  -3  156.88   10.70
  -3  -1   3  154.38   11.20
  -3  -1   3  146.89   11.60
  -3  -1   3  177.58   11.70
  -3  -1   3  169.88   12.80
  -3  -1   3  159.88   11.30
  -3  -1   3  166.68   10.80
  -3  -1   3  168.78   11.00
   2   1  -3  470.45   15.50
   2   1  -3  467.65   13.60
   2   1  -3  465.25   16.80
  -2  -1   3  462.05   16.50
  -2  -1   3  463.15   14.00
  -2  -1   3  454.15   14.30
  -2  -1   3  463.75   16.50
  -2  -1   3  467.85   16.60
  -2  -1   3  476.75   15.10
  -2  -1   3  462.05   15.10
   1   1  -3   92.29    4.40
   1   1  -3   77.29    7.70
   1   1  -3   90.79    4.90
   1   1  -3   86.09    6.60
   1   1  -3   87.99    4.50
  -1  -1   3   96.79    6.80
  -1  -1   3   89.89    7.60
  -1  -1   3   89.39    4.70
  -1  -1   3   75.79    7.20
  -1  -1   3   81.89    5.00
  -1  -1   3   96.09    7.60
   0   1  -3   14.90    3.90
   0   1  -3    7.70    3.50
   0   1  -3   14.20    4.80
   0   1  -3   16.00    2.70
   0  -1   3   11.40    4.00
   0  -1   3   10.80    2.70
   0  -1   3    5.00    3.40
  -1   1  -3  182.38    9.80
  -1   1  -3  141.19    7.30
  -1   1  -3  178.28    9.00
  -1   1  -3  177.78    6.00
  -1   1  -3  173.78    6.90
   1  -1   3  171.78    7.00
   1  -1   3  163.88    5.70
   1  -1   3  155.38    8.20
   1  -1   3  164.08    5.90
  -2   1  -3  896.71   20.60
  -2   1  -3  877.71   20.30
  -2   1  -3  907.61   21.00
  -2   1  -3  901.91   22.70
   2  -1   3  888.91   21.30
   2  -1   3  893.51   20.90
   2  -1   3  893.91   23.00
  -3   1  -3  471.15   14.20
  -3   1  -3  458.85   14.60
  -3   1  -3  460.45   16.90
  -3   1  -3  445.36   17.20
   3  -1   3  475.85   16.90
   3  -1   3  459.35   14.60
   3  -1   3  501.85   17.60
   3  -1   3  464.75   17.70
  -4   1  -3   66.89    9.50
  -4   1  -3   74.59    7.70
  -4   1  -3   67.79    9.00
  -4   1  -3   70.69    6.00
   4  -1   3   71.79    9.30
   4  -1   3   84.69   10.60
   4  -1   3   67.59    9.00
   4  -1   3   80.29    7.40
  -5   1  -3  378.66   19.10
  -5   1  -3  328.27   17.90
  -5   1  -3  388.26   15.20
  -5   1  -3  349.27   10.20
   5  -1   3  363.96   18.60
   5  -1   3  333.67   12.90
   5  -1   3  337.87   18.40
   5  -1   3  385.86   18.60
   5  -1   3  356.76   10.20
  -6   1  -3  139.19   12.00
  -6   1  -3  153.18   16.20
  -6   1  -3  154.38   15.90
   6  -1   3  115.29   14.00
   6  -1   3  138.59   14.50
   6  -1   3  160.88   16.20
   6  -1   3  148.59    9.70
  -7   1  -3  372.26   22.90
  -7   1  -3  366.56   22.90
  -7   1  -3  429.66   19.40
   7  -1   3  386.86   24.40
   7  -1   3  374.86   22.10
   7  -1   3  408.06   23.60
  -8   1  -3   25.80   11.30
   8  -1   3   47.00   11.90
   8  -1   3   40.80   12.50
   8  -1   3   39.60   11.90
  -9   1  -3   28.30   12.20
   9  -1   3   55.39   13.30
   9  -1   3   19.40   12.40
   9  -1   3    9.50   10.10
   8   0  -3   91.29   15.10
   8   0  -3  128.49   18.00
  -8   0   3  102.59   16.60
  -8   0   3   91.09   17.00
   7   0  -3  258.37   22.20
   7   0  -3  199.58   20.20
  -7   0   3  199.68   21.00
  -7   0   3  248.88   22.10
   6   0  -3  565.74   21.50
   6   0  -3  580.24   25.30
   6   0  -3  601.34   26.50
   6   0  -3  599.74   23.00
  -6   0   3  576.14   28.90
  -6   0   3  628.94   27.70
   5   0  -3    9.10    6.30
   5   0  -3   10.90    4.50
   5   0  -3   10.20    5.80
   5   0  -3   13.90    5.90
   5   0  -3   13.90    6.80
  -5   0   3   15.70    8.00
  -5   0   3    7.50    4.60
  -5   0   3   11.00    7.50
   4   0  -3   -1.90    3.40
   4   0  -3   -6.00    3.80
   4   0  -3    3.00    4.80
   4   0  -3    9.00    5.10
  -4   0   3   -5.90    5.80
  -4   0   3   -2.80    5.90
  -4   0   3   -0.40    3.70
   3   0  -3   37.70    6.30
   3   0  -3   46.90    7.90
   3   0  -3   47.90    7.00
   3   0  -3   49.80    7.40
  -3   0   3   43.90    8.80
  -3   0   3   39.90    8.60
  -3   0   3   40.50    6.20
  -3   0   3   47.90    6.60
   2   0  -3  448.76   14.40
   2   0  -3  468.95   16.50
   2   0  -3  446.06   13.90
  -2   0   3  474.75   14.60
  -2   0   3  467.45   18.00
  -2   0   3  452.25   17.20
  -2   0   3  448.36   13.50
   1   0  -3   43.90    3.80
   1   0  -3   48.00    6.00
   1   0  -3   29.30    5.30
   1   0  -3   37.20    4.10
   1   0  -3   38.30    3.50
  -1   0   3   45.10    4.60
  -1   0   3   35.00    6.00
  -1   0   3   48.20    6.20
  -1   0   3   34.20    5.00
   0   0  -3  607.64   15.90
   0   0  -3  621.74   12.50
   0   0  -3  603.04   17.50
   0   0   3  625.24   16.90
   0   0   3  607.34   14.80
   0   0   3  618.64   16.40
   0   0   3  640.84   12.40
  -1   0  -3  734.73   19.30
  -1   0  -3  701.13   14.30
  -1   0  -3  736.73   18.00
  -1   0  -3  716.13   14.30
  -1   0  -3  729.03   16.50
   1   0   3  724.53   17.10
   1   0   3  726.83   14.30
   1   0   3  725.63   18.00
   1   0   3  712.43   14.00
   1   0   3  702.63   17.40
   1   0   3  736.83   14.70
  -2   0  -3 1962.70   35.50
  -2   0  -3 1894.51   37.00
  -2   0  -3 1905.21   33.70
  -2   0  -3 1957.10   37.00
   2   0   3 1900.21   36.70
   2   0   3 1900.41   35.60
   2   0   3 1976.00   38.50
  -3   0  -3 1566.94   30.10
  -3   0  -3 1638.34   35.10
  -3   0  -3 1673.73   33.60
  -3   0  -3 1661.43   35.50
   3   0   3 1642.64   33.70
   3   0   3 1648.44   36.90
   3   0   3 1636.44   35.30
  -4   0  -3  568.94   15.40
  -4   0  -3  563.94   20.20
  -4   0  -3  591.14   20.80
  -4   0  -3  576.84   16.90
   4   0   3  561.04   20.40
   4   0   3  546.35   20.70
   4   0   3  588.04   17.80
  -5   0  -3  175.28    9.30
  -5   0  -3  181.18    9.20
  -5   0  -3  170.48   12.40
  -5   0  -3  177.28   13.70
   5   0   3  175.88   13.80
   5   0   3  174.98   13.20
   5   0   3  166.18   10.00
  -6   0  -3    6.50    4.60
  -6   0  -3   19.70    8.80
  -6   0  -3   14.20    5.90
  -6   0  -3    4.50    8.30
   6   0   3    5.30    5.50
   6   0   3   12.00    8.60
   6   0   3    4.70    7.40
  -7   0  -3   36.50   10.90
  -7   0  -3   36.70   10.20
  -7   0  -3   40.30    8.20
   7   0   3   51.89    8.00
   7   0   3   42.70   11.30
   7   0   3   38.30   10.10
   7   0   3   50.49   11.30
  -8   0  -3   98.59   16.20
  -8   0  -3   85.49   14.80
   8   0   3   85.49   15.00
   8   0   3   91.59   16.10
   8   0   3   69.59   13.60
  -9   0  -3   31.30   12.00
  -9   0  -3   21.30   11.70
   9   0   3    3.40    9.80
   9   0   3   14.50    9.80
   9   0   3   43.70   13.80
  10   0   3  164.68   22.10
  10   0   3  184.68   23.80
  10   0   3  154.88   19.90
   8  -1  -3   43.30   12.30
   8  -1  -3   34.60   13.30
  -8   1   3   32.10   13.00
  -8   1   3   35.30   14.80
   7  -1  -3  130.09   16.30
   7  -1  -3   77.49   14.80
  -7   1   3   89.89   15.40
  -7   1   3  108.49   17.70
   6  -1  -3   37.50   11.60
   6  -1  -3   45.60   11.10
  -6   1   3   32.70   11.40
  -6   1   3   35.30   12.50
   5  -1  -3  121.19   13.60
   5  -1  -3  121.09    8.60
   5  -1  -3  103.99   12.30
   5  -1  -3  127.49   10.80
   5  -1  -3  106.89   10.30
  -5   1   3  113.29    8.50
  -5   1   3  124.39   16.40
  -5   1   3  118.09   14.30
   4  -1  -3  560.54   21.00
   4  -1  -3  520.75   16.70
   4  -1  -3  537.95   21.60
   4  -1  -3  564.84   18.80
  -4   1   3  531.65   23.70
  -4   1   3  531.85   15.90
  -4   1   3  528.85   23.10
   3  -1  -3   68.09    6.30
   3  -1  -3   67.69    8.80
   3  -1  -3   61.49    8.00
   3  -1  -3   80.89    8.60
  -3   1   3   74.59    6.90
  -3   1   3   66.29   10.50
  -3   1   3   72.39   10.10
   2  -1  -3 1001.50   20.60
   2  -1  -3 1018.80   23.90
   2  -1  -3  999.80   25.80
   2  -1  -3 1025.30   20.00
   2  -1  -3 1051.39   26.30
  -2   1   3 1024.70   23.00
  -2   1   3 1033.40   29.00
  -2   1   3 1025.50   20.70
  -2   1   3  965.60   28.40
   1  -1  -3  389.96   10.70
   1  -1  -3  398.96   12.50
   1  -1  -3  358.36   13.70
   1  -1  -3  395.16    9.00
  -1   1   3  362.26   14.40
  -1   1   3  382.06   12.00
  -1   1   3  372.06    9.20
  -1   1   3  339.27   14.20
  -1   1   3  382.66   11.10
   0  -1  -3   51.29    5.00
   0  -1  -3   50.79    4.00
   0  -1  -3   43.00    5.10
   0  -1  -3   42.60    3.10
   0  -1  -3   42.60    6.30
   0   1   3   47.60    3.90
   0   1   3   38.40    5.20
   0   1   3   39.20    2.90
   0   1   3   43.00    5.70
  -1  -1  -3   23.10    2.70
  -1  -1  -3   25.00    4.60
  -1  -1  -3   22.40    3.90
  -1  -1  -3   20.80    4.90
   1   1   3   27.40    4.40
   1   1   3   17.00    3.60
   1   1   3   15.80    4.10
  -2  -1  -3   95.49    4.70
  -2  -1  -3   94.49    7.00
  -2  -1  -3   93.19    6.30
  -2  -1  -3   87.19    5.30
  -2  -1  -3   86.09    6.20
  -2  -1  -3   90.59    7.50
   2   1   3   82.59    5.00
   2   1   3   98.59    7.10
   2   1   3   93.69    7.00
  -3  -1  -3   46.10    3.60
  -3  -1  -3   51.39    6.70
  -3  -1  -3   47.00    6.30
  -3  -1  -3   53.09    6.60
  -3  -1  -3   58.79    4.10
  -3  -1  -3   55.59    6.90
   3   1   3   59.19    6.90
   3   1   3   50.39    7.40
   3   1   3   60.49    6.70
   3   1   3   45.80    3.50
  -4  -1  -3  113.19    5.70
  -4  -1  -3  123.39   10.40
  -4  -1  -3  127.59   11.80
  -4  -1  -3  114.09   10.80
   4   1   3  110.39   11.00
   4   1   3  118.19    5.60
   4   1   3  123.39   10.60
   4   1   3  145.99   12.30
  -5  -1  -3  136.79   12.90
  -5  -1  -3  146.79    7.00
  -5  -1  -3  146.69   10.00
  -5  -1  -3  123.79   11.40
   5   1   3  133.49   12.80
   5   1   3  123.69    9.90
   5   1   3  148.09   13.30
  -6  -1  -3  478.25   22.50
  -6  -1  -3  493.95   14.50
  -6  -1  -3  471.75   17.30
  -6  -1  -3  505.85   20.80
   6   1   3  510.65   22.60
   6   1   3  485.25   18.50
   6   1   3  500.05   22.80
  -7  -1  -3   29.30   10.20
  -7  -1  -3   19.90    8.00
  -7  -1  -3   21.70    8.20
   7   1   3   22.20    9.40
   7   1   3   24.10    9.80
   7   1   3   17.50    6.50
  -8  -1  -3  358.16   22.70
  -8  -1  -3  383.36   24.20
   8   1   3  363.96   23.60
   8   1   3  348.57   23.70
  -9  -1  -3    3.50    9.50
  -9  -1  -3   20.90   11.30
   9   1   3   20.10   10.40
   9   1   3   11.20   10.00
   9   1   3    9.30    9.60
 -10  -1  -3   31.90   12.70
 -10  -1  -3   29.80   13.60
  10   1   3   11.40   10.70
  10   1   3   30.10   13.30
  10   1   3   22.40   12.70
   8  -2  -3   73.89   15.20
   8  -2  -3  101.29   18.50
  -8   2   3  100.59   21.00
  -8   2   3  109.49   18.40
   7  -2  -3   -0.80    8.20
   7  -2  -3  -14.60    9.00
  -7   2   3  -16.00    9.90
  -7   2   3   14.50    9.50
   6  -2  -3   88.19   13.60
   6  -2  -3   96.99   14.90
  -6   2   3  121.79   18.80
  -6   2   3   93.69   15.70
   5  -2  -3  -18.90    5.30
   5  -2  -3   12.30    8.70
  -5   2   3    9.70    8.80
  -5   2   3   -5.70    8.30
   4  -2  -3    3.30    4.50
   4  -2  -3    4.40    7.00
   4  -2  -3    1.10    3.40
   4  -2  -3    3.20    5.90
  -4   2   3    5.90    3.10
  -4   2   3   17.80    8.50
  -4   2   3   -1.20    6.60
   3  -2  -3  577.94   13.60
   3  -2  -3  551.54   19.90
   3  -2  -3  585.74   18.50
   3  -2  -3  551.84   21.90
  -3   2   3  545.05   23.20
  -3   2   3  562.84   14.90
  -3   2   3  561.54   23.40
   2  -2  -3   17.50    2.20
   2  -2  -3   18.70    5.40
   2  -2  -3   20.00    5.90
   2  -2  -3   29.70    6.90
  -2   2   3   11.70    7.50
  -2   2   3   18.10    4.40
  -2   2   3   21.50    7.80
   1  -2  -3  101.29    9.30
   1  -2  -3   99.49    9.20
   1  -2  -3  101.29    7.80
  -1   2   3  100.99   10.10
  -1   2   3  110.89    7.80
  -1   2   3  100.19   10.60
   0  -2  -3  130.89    5.00
   0  -2  -3  150.48    7.30
   0  -2  -3  158.88   10.10
   0  -2  -3  141.49    9.10
   0  -2  -3  136.39    8.50
   0   2   3  136.69    9.00
   0   2   3  133.79    9.10
   0   2   3  136.19    8.10
   0   2   3  145.89    7.00
   0   2   3  144.19    5.00
  -1  -2  -3  218.58    9.50
  -1  -2  -3  217.28    7.80
  -1  -2  -3  228.18    9.40
  -1  -2  -3  220.38   11.40
   1   2   3  231.88    7.70
   1   2   3  202.68    9.70
   1   2   3  229.48   10.40
   1   2   3  217.38    8.30
  -2  -2  -3  702.73   18.00
  -2  -2  -3  673.03   17.00
  -2  -2  -3  707.13   21.10
  -2  -2  -3  703.33   16.90
   2   2   3  694.83   19.60
   2   2   3  675.03   16.10
   2   2   3  694.43   18.70
  -3  -2  -3   98.59    8.70
  -3  -2  -3  110.89    9.20
  -3  -2  -3  108.29    9.10
  -3  -2  -3  101.49    4.50
  -3  -2  -3  108.59    7.60
   3   2   3  109.69    8.70
   3   2   3  104.79    9.70
   3   2   3  109.19    4.70
  -4  -2  -3   13.60    6.40
  -4  -2  -3    2.40    5.00
  -4  -2  -3   14.50    6.20
  -4  -2  -3   12.00    6.30
   4   2   3    8.50    6.20
   4   2   3    5.40    5.70
  -5  -2  -3   10.40    5.40
  -5  -2  -3    9.80    5.40
  -5  -2  -3    7.50    6.00
  -5  -2  -3    7.00    6.00
   5   2   3   17.10    6.10
   5   2   3   11.50    6.10
   5   2   3    8.60    6.00
  -6  -2  -3   -1.20    5.30
  -6  -2  -3    7.40    6.30
  -6  -2  -3    6.70    5.40
  -6  -2  -3   -3.30    4.20
   6   2   3    0.80    5.30
   6   2   3    6.00    1.80
   6   2   3    7.60    5.30
   6   2   3    9.90    6.20
  -7  -2  -3   -1.60    5.80
  -7  -2  -3   -5.40    4.50
  -7  -2  -3    1.60    6.50
   7   2   3    0.60    7.60
   7   2   3    0.40    5.60
   7   2   3    0.70    7.20
  -8  -2  -3   25.80    8.80
  -8  -2  -3   33.70   10.50
   8   2   3    5.30    9.50
   8   2   3   20.70   10.30
   8   2   3   27.70    8.80
  -9  -2  -3   55.09   12.60
  -9  -2  -3   57.99   14.60
   9   2   3   20.70   11.10
   9   2   3   46.70   13.30
 -10  -2  -3   34.00   12.10
 -10  -2  -3   32.20   12.50
  10   2   3   18.00   11.40
  10   2   3   18.80   12.00
   7  -3  -3   12.10   12.30
   7  -3  -3   -9.10    9.40
  -7   3   3   29.80   12.80
  -7   3   3   11.60   11.30
   6  -3  -3   -1.10    9.70
   6  -3  -3   -3.30    8.50
  -6   3   3   13.40   10.40
  -6   3   3   -5.90   11.10
   5  -3  -3  218.38   19.00
   5  -3  -3  186.68   19.10
  -5   3   3  189.28   20.90
  -5   3   3  195.98   21.10
   4  -3  -3   -3.10    5.50
   4  -3  -3  -10.20    7.30
  -4   3   3   -4.90    6.70
  -4   3   3   -4.00    7.80
   3  -3  -3   -1.20    7.60
   3  -3  -3    3.40    7.10
   3  -3  -3    1.90    5.80
  -3   3   3   -4.60    7.50
  -3   3   3    7.30    8.90
   2  -3  -3  278.77   13.90
   2  -3  -3  299.97   13.80
   2  -3  -3  289.77   15.70
  -2   3   3  269.47    9.90
  -2   3   3  293.37   16.80
  -2   3   3  291.57   16.80
   1  -3  -3   68.69   10.10
   1  -3  -3   71.89    8.30
   1  -3  -3   73.99    9.10
  -1   3   3   74.09    9.60
  -1   3   3   81.99   10.20
  -1   3   3   80.69    7.00
   0  -3  -3  380.46   16.90
   0  -3  -3  344.37   16.20
   0  -3  -3  320.27   14.00
   0   3   3  351.46    8.20
   0   3   3  367.26    8.40
   0   3   3  373.96   16.90
   0   3   3  378.86   14.20
   0   3   3  365.86   16.50
  -1  -3  -3 3227.78   54.59
  -1  -3  -3 3150.38   55.59
  -1  -3  -3 3282.17   57.79
  -1  -3  -3 3144.09   61.29
   1   3   3 3095.09   57.79
   1   3   3 3238.68   57.09
   1   3   3 3108.99   52.79
   1   3   3 3179.98   57.49
  -2  -3  -3 2912.61   52.59
  -2  -3  -3 2945.91   59.09
  -2  -3  -3 3016.90   50.89
  -2  -3  -3 3093.29   54.89
   2   3   3 2964.80   56.09
   2   3   3 2981.60   52.49
   2   3   3 2987.40   53.89
  -3  -3  -3  257.07   13.20
  -3  -3  -3  239.08   11.10
  -3  -3  -3  282.77   15.80
  -3  -3  -3  270.87   13.60
   3   3   3  266.77    9.50
   3   3   3  283.77   14.20
   3   3   3  274.47   14.40
  -4  -3  -3   15.00    6.90
  -4  -3  -3    4.60    6.00
  -4  -3  -3   10.90    6.30
  -4  -3  -3    9.70    4.70
   4   3   3    7.20    6.40
   4   3   3    3.90    6.50
  -5  -3  -3  359.86   14.00
  -5  -3  -3  348.77   17.40
  -5  -3  -3  357.16   17.50
  -5  -3  -3  360.56   18.40
   5   3   3  341.57   18.00
   5   3   3  378.56   17.30
  -6  -3  -3  118.39   13.70
  -6  -3  -3  151.18   10.90
  -6  -3  -3  148.29   12.50
  -6  -3  -3  116.89   13.10
   6   3   3  167.18   16.20
   6   3   3  162.58   12.80
  -7  -3  -3  244.88   15.30
  -7  -3  -3  219.48   16.90
  -7  -3  -3  224.58   14.50
  -7  -3  -3  219.58   17.70
   7   3   3  222.88   15.70
   7   3   3  201.38   18.70
   7   3   3  207.58   19.10
  -8  -3  -3   12.80    6.90
  -8  -3  -3   28.40   11.60
  -8  -3  -3   10.40    9.50
  -8  -3  -3   10.20    7.30
   8   3   3   14.90    7.70
   8   3   3    3.70    7.50
   8   3   3    4.70    8.40
  -9  -3  -3  223.08   23.50
  -9  -3  -3  212.48   19.70
   9   3   3  183.08   21.30
   9   3   3  187.28   17.50
   9   3   3  209.98   22.30
 -10  -3  -3   45.80   13.90
 -10  -3  -3   22.00   10.60
  10   3   3   35.10   13.50
  10   3   3   42.50   14.00
   6  -4  -3   39.30   12.90
   6  -4  -3   13.70   11.50
  -6   4   3   44.70   13.90
  -6   4   3   66.09   17.20
   5  -4  -3   -2.70    9.00
   5  -4  -3    8.20    9.30
  -5   4   3   11.40   10.40
  -5   4   3   -6.70    8.30
   4  -4  -3  106.39   14.20
   4  -4  -3  107.39   14.90
  -4   4   3  134.49   17.50
  -4   4   3  122.69   16.80
   3  -4  -3    2.50    4.70
   3  -4  -3   -2.40    6.80
   3  -4  -3    4.80    7.70
  -3   4   3    4.00    7.70
  -3   4   3    1.30    7.60
   2  -4  -3  112.69   11.40
   2  -4  -3  118.99   13.60
   2  -4  -3  108.39   10.60
  -2   4   3  101.59   12.60
  -2   4   3  105.79    6.80
  -2   4   3   91.69   12.20
   1  -4  -3  487.75   20.60
   1  -4  -3  485.35   19.20
   1  -4  -3  489.45   19.00
  -1   4   3  520.45   21.40
  -1   4   3  473.95   21.30
  -1   4   3  476.05   14.90
   0  -4  -3   60.29    9.10
   0  -4  -3   63.09   10.10
   0  -4  -3   59.69    8.80
   0   4   3   58.49    3.80
   0   4   3   58.79    8.50
   0   4   3   54.79    3.80
   0   4   3   53.49    9.10
   0   4   3   57.49    7.20
  -1  -4  -3  139.79   10.00
  -1  -4  -3  133.89   11.10
  -1  -4  -3  155.98   12.90
  -1  -4  -3  149.29   13.60
   1   4   3  132.59    8.00
   1   4   3  135.69   11.80
   1   4   3  135.99   10.50
   1   4   3  131.39   10.20
  -2  -4  -3   18.00    8.00
  -2  -4  -3   30.10    5.30
  -2  -4  -3   20.60    8.30
  -2  -4  -3   26.90    7.00
   2   4   3   30.00    6.00
   2   4   3   15.30    5.60
   2   4   3   26.70    6.60
  -3  -4  -3   37.40    5.70
  -3  -4  -3   51.89    9.50
  -3  -4  -3   48.90    9.00
  -3  -4  -3   46.80    8.10
   3   4   3   49.00    8.00
   3   4   3   40.80    8.00
   3   4   3   51.19    6.20
  -4  -4  -3  385.66   17.70
  -4  -4  -3  355.16   12.00
  -4  -4  -3  395.66   19.30
  -4  -4  -3  375.96   18.10
   4   4   3  373.56   10.90
   4   4   3  362.46   18.20
   4   4   3  392.76   18.50
  -5  -4  -3   63.79    9.50
  -5  -4  -3   56.19    9.50
  -5  -4  -3   51.39    9.40
  -5  -4  -3   67.99    6.60
   5   4   3   63.39   10.10
   5   4   3   61.89   10.50
  -6  -4  -3    3.80    6.00
  -6  -4  -3   -9.10    5.30
  -6  -4  -3    3.90    6.50
  -6  -4  -3   -0.40    3.90
   6   4   3    1.60    6.20
   6   4   3    0.80    6.00
  -7  -4  -3   18.90    6.10
  -7  -4  -3   23.00    9.00
  -7  -4  -3   19.80    8.40
  -7  -4  -3   19.80    9.10
   7   4   3    5.40    7.50
   7   4   3    8.60    8.30
  -8  -4  -3  928.91   33.60
  -8  -4  -3 1004.60   37.90
  -8  -4  -3 1020.10   31.20
  -8  -4  -3  915.51   37.80
   8   4   3  957.30   34.10
   8   4   3  982.00   38.20
   8   4   3 1025.20   39.20
  -9  -4  -3   63.99   13.90
  -9  -4  -3   71.69   15.80
  -9  -4  -3   56.79   11.10
   9   4   3   61.79   12.00
   9   4   3   64.49   14.40
   9   4   3   51.89   13.70
 -10  -4  -3   13.40   10.50
 -10  -4  -3   32.90   10.60
  10   4   3   -1.70    8.80
  10   4   3   20.00   11.30
  10   4   3   42.10   10.80
 -11  -4  -3  115.29   20.00
  11   4   3  130.79   20.00
  11   4   3   85.39   17.70
   6  -5  -3   44.70   16.30
   6  -5  -3   49.70   15.50
  -6   5   3   54.69   16.30
  -6   5   3   57.49   15.90
   5  -5  -3   91.89   18.00
   5  -5  -3   80.19   15.50
  -5   5   3   81.19   17.70
  -5   5   3   84.29   15.60
   4  -5  -3    3.10   10.00
   4  -5  -3   -3.20   11.00
  -4   5   3    9.40   10.70
  -4   5   3   33.70   11.90
   3  -5  -3   41.40   12.70
   3  -5  -3   19.10   10.90
  -3   5   3    7.00    9.80
  -3   5   3   32.40   10.20
   2  -5  -3   71.59   12.90
   2  -5  -3   82.89   12.90
   2  -5  -3   99.99   10.90
  -2   5   3   83.19   12.50
  -2   5   3   83.19   13.50
   1  -5  -3   17.00    5.90
   1  -5  -3    8.90    8.00
   1  -5  -3   13.00    7.30
  -1   5   3    3.90    6.00
  -1   5   3    7.70    4.10
  -1   5   3    0.80    6.00
   0  -5  -3   14.10    6.30
   0  -5  -3   20.10    6.60
   0  -5  -3   11.80    7.80
   0   5   3   14.20    2.80
   0   5   3   33.20    7.50
   0   5   3    8.50    4.70
   0   5   3   16.60    2.90
   0   5   3   12.60    7.00
  -1  -5  -3   50.99    8.70
  -1  -5  -3   68.99   10.50
  -1  -5  -3   65.39   10.10
   1   5   3   54.29    7.80
   1   5   3   59.29    6.20
   1   5   3   48.70    8.20
   1   5   3   43.60    7.30
  -2  -5  -3  608.74   20.70
  -2  -5  -3  632.84   22.80
  -2  -5  -3  576.84   23.70
  -2  -5  -3  594.34   17.10
   2   5   3  603.94   20.80
   2   5   3  592.84   21.00
   2   5   3  579.94   18.90
  -3  -5  -3   45.60    5.60
  -3  -5  -3   45.10    9.70
  -3  -5  -3   35.40    8.50
  -3  -5  -3   43.60    8.40
   3   5   3   42.10    8.60
   3   5   3   49.80    8.10
   3   5   3   37.90    6.50
  -4  -5  -3 1421.06   37.40
  -4  -5  -3 1495.25   37.70
  -4  -5  -3 1456.95   28.00
  -4  -5  -3 1418.16   40.70
   4   5   3 1546.75   39.60
   4   5   3 1487.75   30.80
   4   5   3 1510.25   38.80
  -5  -5  -3   41.60    8.60
  -5  -5  -3   66.69    5.70
  -5  -5  -3   51.79   10.00
  -5  -5  -3   54.19    9.20
   5   5   3   59.29    4.90
   5   5   3   61.89   10.00
   5   5   3   46.50    9.80
  -6  -5  -3   37.40    5.50
  -6  -5  -3   32.10    9.30
  -6  -5  -3   37.00    9.70
  -6  -5  -3   22.70    7.70
   6   5   3   20.60    8.30
   6   5   3   37.80   10.30
  -7  -5  -3   50.89   12.20
  -7  -5  -3   36.00    9.70
  -7  -5  -3   52.69   11.70
  -7  -5  -3   43.60    6.90
   7   5   3   27.20    9.20
   7   5   3   34.70   11.30
  -8  -5  -3  142.89   18.30
  -8  -5  -3  121.99   16.40
  -8  -5  -3  153.58   13.20
  -8  -5  -3  171.08   19.50
   8   5   3  114.59   16.20
   8   5   3  168.18   18.20
  -9  -5  -3  204.78   22.70
  -9  -5  -3  248.98   23.40
  -9  -5  -3  259.07   20.20
   9   5   3  230.08   23.90
   9   5   3  224.58   21.10
   9   5   3  243.88   24.70
 -10  -5  -3   -2.20    9.80
 -10  -5  -3    8.30    9.80
  10   5   3   -2.70    8.40
  10   5   3   -8.70    8.10
  10   5   3   23.10   12.40
 -11  -5  -3   15.10   12.80
  11   5   3   22.30   13.60
  11   5   3   20.10   12.60
   5  -6  -3   64.99   17.50
   5  -6  -3   80.49   19.40
  -5   6   3  120.59   19.90
  -5   6   3   80.79   17.40
   4  -6  -3  -23.70   11.40
   4  -6  -3   -4.20   12.20
  -4   6   3   -6.70    9.00
  -4   6   3   -7.70    9.80
   3  -6  -3   90.69   16.40
   3  -6  -3  133.29   18.50
  -3   6   3  130.59   18.70
  -3   6   3  170.28   20.20
   2  -6  -3  264.17   21.70
   2  -6  -3  267.67   21.50
  -2   6   3  254.87   20.10
  -2   6   3  273.07   20.60
   1  -6  -3  144.59   16.10
   1  -6  -3  128.49   16.60
   1  -6  -3  127.69   13.50
  -1   6   3  114.29   14.40
  -1   6   3  160.78   16.10
  -1   6   3  133.59    9.20
   0  -6  -3   81.69   12.80
   0  -6  -3   85.89   11.90
   0  -6  -3   79.69   12.00
   0   6   3  100.89   13.50
   0   6   3   85.29    9.40
   0   6   3   96.69   12.30
   0   6   3   65.49    5.80
  -1  -6  -3   10.00    7.00
  -1  -6  -3    9.60    6.00
  -1  -6  -3    4.50    8.20
   1   6   3   -0.70    4.90
   1   6   3   23.10    6.30
   1   6   3   13.80    4.20
   1   6   3   20.70    7.30
  -2  -6  -3    0.90    3.80
  -2  -6  -3   -7.40    5.20
  -2  -6  -3   -2.30    6.60
  -2  -6  -3   -3.40    4.60
   2   6   3   -0.50    5.00
   2   6   3   -4.20    4.80
   2   6   3    2.90    4.30
   2   6   3    8.50    4.70
  -3  -6  -3  149.09   13.50
  -3  -6  -3  154.48   16.00
  -3  -6  -3  127.49    7.80
  -3  -6  -3  156.08   14.50
   3   6   3  126.09   12.10
   3   6   3  130.39   13.10
   3   6   3  134.79   11.00
  -4  -6  -3  233.78   15.80
  -4  -6  -3  219.68   14.60
  -4  -6  -3  260.77    9.40
  -4  -6  -3  252.67   18.30
   4   6   3  255.87   15.90
   4   6   3  214.08   15.60
   4   6   3  246.28   12.40
  -5  -6  -3 1060.89   20.70
  -5  -6  -3 1086.09   33.60
  -5  -6  -3  994.60   36.00
  -5  -6  -3 1044.20   33.90
   5   6   3 1092.69   25.00
   5   6   3 1009.10   33.60
   5   6   3 1043.90   34.10
  -6  -6  -3   53.89   11.30
  -6  -6  -3   19.30    9.00
  -6  -6  -3   33.50    9.80
  -6  -6  -3   35.30    4.90
   6   6   3   45.30   10.70
   6   6   3   27.40    9.20
  -7  -6  -3  558.24   28.20
  -7  -6  -3  499.45   25.20
  -7  -6  -3  534.55   27.00
   7   6   3  508.45   25.40
   7   6   3  457.65   26.20
  -8  -6  -3  277.17   22.10
  -8  -6  -3  292.67   22.60
  -8  -6  -3  296.67   23.10
   8   6   3  311.57   24.20
   8   6   3  294.97   21.50
  -9  -6  -3   92.49   16.80
  -9  -6  -3   82.59   15.60
  -9  -6  -3   84.49   16.50
   9   6   3   89.59   15.40
   9   6   3   63.19   14.30
 -10  -6  -3   34.60   13.20
 -10  -6  -3   18.50   11.30
 -10  -6  -3   34.70   11.70
  10   6   3   27.00   12.60
  10   6   3   19.80   10.60
  10   6   3   25.40   12.60
 -11  -6  -3   44.40   15.00
 -11  -6  -3   43.60   14.50
  11   6   3   31.80   13.60
  11   6   3   25.00   13.00
  11   6   3   35.90   12.30
   4  -7  -3   29.70   16.40
   4  -7  -3   71.99   18.20
  -4   7   3   75.39   17.50
  -4   7   3   77.29   17.60
   3  -7  -3   38.20   15.00
   3  -7  -3   82.89   16.20
  -3   7   3   98.49   17.00
  -3   7   3   69.29   16.10
   2  -7  -3  248.78   23.50
   2  -7  -3  260.17   21.50
  -2   7   3  329.97   23.10
  -2   7   3  221.78   22.40
   1  -7  -3   55.59   13.70
   1  -7  -3   58.09   10.70
   1  -7  -3   53.19   14.80
  -1   7   3   55.89   12.00
  -1   7   3   68.99   13.10
   0  -7  -3   22.60    9.30
   0  -7  -3   14.20    7.80
   0  -7  -3   20.20   10.90
   0   7   3   25.70    6.90
   0   7   3   23.40    9.90
   0   7   3   19.80    8.20
  -1  -7  -3  187.28   16.90
  -1  -7  -3  162.18   16.50
  -1  -7  -3  193.78   18.70
  -1  -7  -3  173.68   10.60
   1   7   3  193.58   18.10
   1   7   3  181.48   13.50
   1   7   3  188.58   13.40
   1   7   3  184.38   10.80
  -2  -7  -3  171.38   15.70
  -2  -7  -3  143.49   10.80
  -2  -7  -3  130.89   10.10
  -2  -7  -3  148.99   15.80
  -2  -7  -3  131.39   15.70
   2   7   3  136.09   10.70
   2   7   3  155.78   14.90
   2   7   3  144.99   13.60
   2   7   3  128.19   11.40
  -3  -7  -3  109.89   13.00
  -3  -7  -3   88.69   13.50
  -3  -7  -3   83.79   12.30
  -3  -7  -3   96.79    7.90
   3   7   3  103.09   11.70
   3   7   3   78.19   11.20
   3   7   3   96.89   11.50
  -4  -7  -3  156.88   18.00
  -4  -7  -3  134.59   14.60
  -4  -7  -3  118.19    7.10
  -4  -7  -3  123.89   14.20
   4   7   3  116.99   11.40
   4   7   3  135.29   15.20
   4   7   3  117.69   13.10
  -5  -7  -3  247.48   17.70
  -5  -7  -3  257.67   18.50
  -5  -7  -3  239.68   19.10
   5   7   3  243.88   18.10
   5   7   3  248.58   13.20
   5   7   3  268.77   18.40
  -6  -7  -3   24.80   10.70
  -6  -7  -3   37.50   11.00
  -6  -7  -3   32.40   10.70
   6   7   3   28.60    9.70
   6   7   3   23.50    9.20
  -7  -7  -3  284.57   21.70
  -7  -7  -3  264.77   20.00
  -7  -7  -3  266.57   20.60
   7   7   3  258.47   19.50
   7   7   3  248.38   23.30
  -8  -7  -3  197.38   20.30
  -8  -7  -3  235.58   23.40
  -8  -7  -3  239.68   23.70
   8   7   3  202.48   20.70
   8   7   3  199.58   23.00
  -9  -7  -3  242.28   24.60
  -9  -7  -3  218.28   24.00
  -9  -7  -3  235.78   23.70
   9   7   3  197.18   22.40
   9   7   3  224.48   23.10
 -10  -7  -3  213.58   24.60
 -10  -7  -3  198.68   22.50
 -10  -7  -3  281.37   27.60
  10   7   3  185.38   23.00
  10   7   3  242.78   25.30
   3  -8  -3   -5.60   15.80
   3  -8  -3   19.10   15.20
  -3   8   3   15.60   11.10
  -3   8   3   18.30   11.80
   2  -8  -3  438.16   28.40
   2  -8  -3  369.96   28.20
  -2   8   3  459.85   30.00
  -2   8   3  436.46   27.40
   1  -8  -3    4.30   13.30
   1  -8  -3   13.50   10.50
  -1   8   3    9.80    8.90
  -1   8   3   15.60   11.00
   0  -8  -3   12.30   10.40
   0  -8  -3    9.30    8.40
   0  -8  -3   -9.30   10.40
   0   8   3    9.30    9.80
   0   8   3    2.30    7.30
  -1  -8  -3   11.50    8.60
  -1  -8  -3   14.80   10.30
  -1  -8  -3   12.80   11.10
   1   8   3   10.60    9.10
   1   8   3   17.70    7.30
   1   8   3   15.20    7.50
  -2  -8  -3   22.00    6.40
  -2  -8  -3   11.40    8.50
  -2  -8  -3   24.60    7.30
  -2  -8  -3   20.60   11.10
  -2  -8  -3   10.10    9.20
   2   8   3   28.40    7.10
   2   8   3   29.00    7.80
   2   8   3   11.20    7.60
   2   8   3   25.20    8.70
  -3  -8  -3    9.30    9.70
  -3  -8  -3   -6.30    8.20
  -3  -8  -3  -11.60    6.80
   3   8   3    0.40    6.60
   3   8   3    3.60    7.00
   3   8   3    2.70    6.00
  -4  -8  -3  283.07   20.80
  -4  -8  -3  307.87   20.60
  -4  -8  -3  358.76   23.60
   4   8   3  309.07   17.50
   4   8   3  355.76   21.00
   4   8   3  306.47   19.10
  -5  -8  -3    6.70    8.20
  -5  -8  -3   -1.80    8.90
  -5  -8  -3    3.20    9.20
   5   8   3   19.70    8.70
   5   8   3   16.10    8.20
   5   8   3    5.90    5.80
  -6  -8  -3   12.30   10.10
  -6  -8  -3   17.80    9.30
  -6  -8  -3  -11.80    8.50
   6   8   3    1.20    8.70
   6   8   3    7.20    7.90
  -7  -8  -3   30.00   10.80
  -7  -8  -3   39.80   11.80
  -7  -8  -3   34.80   11.20
   7   8   3   27.80    9.60
   7   8   3   49.00   12.70
  -8  -8  -3   49.99   14.20
  -8  -8  -3   64.49   14.10
  -8  -8  -3   80.39   16.30
   8   8   3   58.79   13.70
   8   8   3   53.79   12.80
  -9  -8  -3   28.30   12.70
  -9  -8  -3   24.20   11.70
  -9  -8  -3    1.80    8.30
   9   8   3    0.90    9.90
   9   8   3    0.30   10.10
 -10  -8  -3   41.50   13.70
 -10  -8  -3   42.20   13.50
 -10  -8  -3   42.30   13.00
  10   8   3   30.00   12.00
  10   8   3   33.80   14.00
   2  -9  -3   26.90   12.70
   2  -9  -3   32.50   15.40
  -2   9   3   25.90   13.20
  -2   9   3   40.00   13.60
   1  -9  -3   95.99   17.30
   1  -9  -3  101.29   19.80
  -1   9   3   80.29   15.00
  -1   9   3   60.89   15.50
   0  -9  -3   -1.20   12.00
   0  -9  -3   18.50   11.50
   0   9   3   11.20   10.10
   0   9   3    6.10    8.70
  -1  -9  -3   67.99   15.20
  -1  -9  -3   53.19   12.80
  -1  -9  -3   62.89   14.00
   1   9   3   61.49   12.80
  -2  -9  -3  114.09   17.50
  -2  -9  -3   84.79   14.60
  -2  -9  -3  132.49   18.90
   2   9   3  112.29   16.20
   2   9   3   93.99   13.10
  -3  -9  -3  206.38   20.70
  -3  -9  -3  289.67   26.90
  -3  -9  -3  247.38   19.80
   3   9   3  234.28   20.90
   3   9   3  268.67   17.50
   3   9   3  256.97   19.00
  -4  -9  -3  442.16   27.30
  -4  -9  -3  485.95   26.50
  -4  -9  -3  402.86   26.70
   4   9   3  415.56   24.30
   4   9   3  444.66   23.20
   4   9   3  492.95   23.50
  -5  -9  -3   37.70   11.00
  -5  -9  -3   51.59   13.60
  -5  -9  -3   49.99   13.80
   5   9   3   43.70   10.70
   5   9   3   34.30   10.80
   5   9   3   36.30    8.90
  -6  -9  -3   23.10    9.90
  -6  -9  -3   -2.20   10.40
  -6  -9  -3    2.20    8.80
   6   9   3   -6.60    7.10
   6   9   3   11.20    8.90
  -7  -9  -3   23.40   11.70
  -7  -9  -3   25.30   11.00
  -7  -9  -3   42.00   12.40
   7   9   3   32.30   11.00
   7   9   3   17.40   10.80
  -8  -9  -3  150.78   19.60
  -8  -9  -3  124.69   18.50
  -8  -9  -3  107.99   19.20
   8   9   3   96.79   17.20
   8   9   3  104.69   17.00
  -9  -9  -3   -8.30   10.00
  -9  -9  -3    4.10    9.50
  -9  -9  -3    8.60   11.70
   9   9   3    6.50    9.60
   9   9   3   12.80   11.90
 -10  -9  -3    5.00   10.70
 -10  -9  -3   14.20   12.20
 -10  -9  -3    0.40   10.00
  10   9   3   -7.10   10.70
  10   9   3   -0.70    9.00
   0 -10  -3   40.90   13.50
   0 -10  -3    5.90   13.10
   0  10   3   40.00   13.10
  -1 -10  -3   10.00   10.80
  -1 -10  -3   17.10   11.00
  -1 -10  -3   25.00   13.30
   1  10   3   27.90   11.30
  -2 -10  -3   50.39   14.40
  -2 -10  -3   41.40   11.90
  -2 -10  -3   33.30   15.10
   2  10   3   28.70   11.40
  -3 -10  -3   36.70   13.50
  -3 -10  -3   24.90   12.70
  -3 -10  -3   42.50   13.00
   3  10   3   41.60   11.50
   3  10   3    5.30    9.40
  -4 -10  -3  127.19   18.20
  -4 -10  -3  121.59   16.80
  -4 -10  -3  131.69   19.80
   4  10   3  172.28   18.00
   4  10   3  133.19   18.00
   4  10   3  131.49   16.00
  -5 -10  -3  470.85   27.80
  -5 -10  -3  488.55   29.50
  -5 -10  -3  453.05   29.80
   5  10   3  410.26   24.90
   5  10   3  446.06   26.70
   5  10   3  410.16   22.90
  -6 -10  -3   15.60   12.00
  -6 -10  -3    5.40   10.40
  -6 -10  -3   -3.10    9.30
   6  10   3   -4.90    8.40
   6  10   3   -1.50    7.40
  -7 -10  -3   73.09   15.30
  -7 -10  -3   57.29   14.10
  -7 -10  -3   69.89   16.50
   7  10   3   50.79   13.10
   7  10   3   33.10   11.80
  -8 -10  -3  124.79   18.70
  -8 -10  -3  174.78   22.00
  -8 -10  -3  127.79   20.90
   8  10   3  108.39   17.80
   8  10   3  127.19   19.10
  -9 -10  -3    4.20   10.50
  -9 -10  -3  -11.20    9.00
  -9 -10  -3   19.10   12.40
   9  10   3   -7.60    9.60
   9  10   3  -12.30    8.30
  -1 -11  -3   34.20   13.80
  -1 -11  -3   27.40   14.60
   1  11   3   24.90   12.60
  -2 -11  -3  104.99   19.30
  -2 -11  -3  127.19   19.30
  -2 -11  -3   52.39   15.90
   2  11   3   43.10   14.00
  -3 -11  -3   -1.90   11.40
  -3 -11  -3   22.80   13.90
  -3 -11  -3   28.10   11.90
   3  11   3   18.30   10.30
  -4 -11  -3   40.40   13.90
  -4 -11  -3   48.10   15.40
  -4 -11  -3   51.89   14.00
   4  11   3   31.50   11.40
   4  11   3   44.30   12.60
  -5 -11  -3  108.19   17.80
  -5 -11  -3  125.39   18.00
  -5 -11  -3  130.39   21.20
   5  11   3  128.69   16.50
   5  11   3  122.19   18.90
  -6 -11  -3  162.28   23.60
  -6 -11  -3  194.38   22.00
  -6 -11  -3  168.58   20.70
   6  11   3  200.68   22.60
   6  11   3  164.68   20.00
  -7 -11  -3   29.20   16.20
  -7 -11  -3   30.80   12.80
  -7 -11  -3   39.90   12.80
   7  11   3   32.60   13.50
   7  11   3   42.00   13.20
  -8 -11  -3   73.49   15.50
  -8 -11  -3   71.69   18.80
  -8 -11  -3   46.60   15.00
   8  11   3   36.80   12.20
   8  11   3   58.09   14.90
  -5 -12  -3  202.68   27.60
  -5 -12  -3  163.48   21.10
  -5 -12  -3  180.58   23.30
   5  12   3  203.78   24.20
   5  12   3  198.38   32.10
  -6 -12  -3    2.30   13.90
  -6 -12  -3   19.50   14.50
  -6 -12  -3   22.00   13.00
   6  12   3   -6.40   11.40
   7  11  -4  233.68   26.00
  -7 -11   4  268.07   27.60
  -7 -11   4  276.27   28.90
   6  11  -4   59.39   12.70
   6  11  -4   47.30   14.10
  -6 -11   4   51.39   15.00
  -6 -11   4   14.60   11.00
  -6 -11   4   62.09   16.30
   5  11  -4    2.40    9.20
   5  11  -4   -4.50    7.80
  -5 -11   4   -8.10    7.70
  -5 -11   4   -3.50   10.40
  -5 -11   4    6.60   11.50
   4  11  -4  101.39   16.90
   4  11  -4   99.29   15.50
  -4 -11   4  102.79   19.50
  -4 -11   4   82.99   16.30
  -4 -11   4  108.39   18.60
   3  11  -4   33.00   11.90
   3  11  -4   63.49   13.50
  -3 -11   4   78.59   16.90
  -3 -11   4   23.10    9.50
  -3 -11   4   53.89   14.60
   2  11  -4   -2.20    7.10
   2  11  -4    2.20    7.80
  -2 -11   4   -1.70   12.40
  -2 -11   4   -4.00    7.20
  -2 -11   4    0.50    9.30
   1  11  -4   42.60   13.40
  -1 -11   4   19.60   14.40
  -1 -11   4   24.80   11.70
   8  10  -4    0.50    8.90
  -8 -10   4   -7.20   10.30
  -8 -10   4    6.80   13.70
  -8 -10   4    9.60   13.90
   7  10  -4   -1.20    9.30
   7  10  -4   -7.20    6.90
  -7 -10   4    0.10   11.10
  -7 -10   4    7.50   12.20
  -7 -10   4  -12.60    9.30
   6  10  -4   89.79   13.70
   6  10  -4   81.39   15.40
  -6 -10   4   70.79   15.70
  -6 -10   4   80.39   16.50
  -6 -10   4  114.69   18.50
   5  10  -4   10.70    8.70
   5  10  -4   31.60   10.80
  -5 -10   4   28.80   13.30
  -5 -10   4   -2.00    9.20
  -5 -10   4   26.00   10.00
  -5 -10   4   13.10   11.00
   4  10  -4   35.60   11.20
   4  10  -4   57.19   12.70
  -4 -10   4   42.70   12.90
  -4 -10   4   64.09   15.40
  -4 -10   4   12.50    7.80
  -4 -10   4   60.39   11.90
   3  10  -4   38.90   10.90
   3  10  -4   32.10   10.70
  -3 -10   4   74.29   15.70
  -3 -10   4   40.40   12.50
  -3 -10   4   16.10    8.70
  -3 -10   4   37.40   10.80
   2  10  -4    0.70    7.30
   2  10  -4   13.50    9.90
  -2 -10   4    2.60    9.20
  -2 -10   4    8.00    9.60
  -2 -10   4   33.60   12.30
  -2 -10   4   12.30    9.70
   1  10  -4   52.59   11.00
   1  10  -4   38.70   11.30
  -1 -10   4   40.70   11.50
  -1 -10   4   51.49   13.90
  -1 -10   4   45.90   12.30
  -1 -10   4   63.39   13.70
   0  10  -4  161.88   19.60
   0 -10   4  131.59   18.90
   0 -10   4  152.38   18.40
   0 -10   4  161.08   19.00
  -1  10  -4   -1.70    9.50
   1 -10   4   10.20   12.30
   1 -10   4   17.60   12.40
   8   9  -4   58.69   15.10
  -8  -9   4   55.29   13.30
  -8  -9   4   48.00   14.10
  -8  -9   4   51.09   15.30
  -8  -9   4   49.50   16.10
   7   9  -4   40.70   12.20
   7   9  -4   66.69   12.00
  -7  -9   4   57.99   16.00
  -7  -9   4   30.80   14.50
  -7  -9   4   51.19   13.90
  -7  -9   4   55.19   12.20
   6   9  -4   14.20    8.40
   6   9  -4   -5.20    7.80
  -6  -9   4   11.30   11.30
  -6  -9   4   15.60   11.90
  -6  -9   4   28.70    9.90
  -6  -9   4   45.60   13.00
   5   9  -4  176.98   17.80
   5   9  -4  144.69   18.80
  -5  -9   4  132.69   18.10
  -5  -9   4  128.99   18.00
  -5  -9   4  168.18   16.20
  -5  -9   4  116.19   17.80
   4   9  -4  147.09   16.40
   4   9  -4  120.39   16.70
  -4  -9   4  138.49   14.90
  -4  -9   4  126.99   18.30
  -4  -9   4  148.49   20.10
  -4  -9   4  123.79   17.40
   3   9  -4    7.20    7.50
   3   9  -4   19.70    8.90
  -3  -9   4    2.70    8.00
  -3  -9   4   15.30    8.60
  -3  -9   4   10.00    9.10
  -3  -9   4   20.10   11.00
  -3  -9   4   12.30    9.60
   2   9  -4   18.90    8.40
   2   9  -4   29.20   11.00
  -2  -9   4   21.20   10.40
  -2  -9   4   35.30   10.90
  -2  -9   4   33.80   12.80
  -2  -9   4    9.50    8.10
  -2  -9   4   45.60   10.50
   1   9  -4   79.59   13.00
   1   9  -4   81.59   13.80
  -1  -9   4  113.59   17.70
  -1  -9   4   97.89   14.30
  -1  -9   4  101.49   15.80
  -1  -9   4   81.79   14.20
   0   9  -4   -3.70    8.10
   0   9  -4    7.10    7.10
   0  -9   4   -0.20   10.10
   0  -9   4   25.00   10.40
   0  -9   4   17.10    9.50
   0  -9   4   -2.00    9.80
  -1   9  -4   -3.40    6.60
  -1   9  -4   -3.40    8.90
   1  -9   4    0.40   10.60
   1  -9   4   16.60    9.80
   1  -9   4   24.40   11.50
  -2   9  -4   12.70    9.80
  -2   9  -4   18.00   11.50
   2  -9   4   -4.50    9.70
   2  -9   4    6.60   14.40
   2  -9   4    0.00   11.90
  -3   9  -4   55.69   15.20
  -3   9  -4   47.80   13.60
   3  -9   4   62.49   17.20
   3  -9   4   24.90   14.60
   9   8  -4   66.39   15.70
   9   8  -4   56.59   15.80
  -9  -8   4   59.29   14.80
  -9  -8   4   69.99   17.30
  -9  -8   4   50.99   16.00
  -9  -8   4   77.59   17.70
   8   8  -4   76.59   16.70
   8   8  -4   52.49   14.50
  -8  -8   4   74.99   17.50
  -8  -8   4   41.00   13.60
  -8  -8   4   28.00   12.50
  -8  -8   4   60.89   13.70
   7   8  -4  190.28   16.80
   7   8  -4  219.48   22.10
  -7  -8   4  225.38   23.80
  -7  -8   4  196.18   23.40
  -7  -8   4  182.88   18.60
  -7  -8   4  192.88   22.30
   6   8  -4  188.48   17.00
   6   8  -4  140.29   17.90
  -6  -8   4  188.58   20.70
  -6  -8   4  186.48   22.50
  -6  -8   4  228.28   25.30
  -6  -8   4  183.98   17.60
   5   8  -4   67.09   11.50
   5   8  -4   56.19   12.40
  -5  -8   4   88.39   14.80
  -5  -8   4   81.39   11.90
  -5  -8   4   60.69   15.20
  -5  -8   4   85.09   14.30
  -5  -8   4   61.59   14.10
   4   8  -4  175.08   16.50
   4   8  -4  137.09   16.90
  -4  -8   4  175.58   19.60
  -4  -8   4  147.19   17.90
  -4  -8   4  135.79   17.00
  -4  -8   4  153.48   20.20
  -4  -8   4  186.58   15.70
   3   8  -4  797.82   30.30
   3   8  -4  800.52   32.20
  -3  -8   4  736.83   32.80
  -3  -8   4  734.73   31.60
  -3  -8   4  794.62   27.10
  -3  -8   4  776.72   32.50
   2   8  -4    7.30    5.30
   2   8  -4   10.60    7.00
   2   8  -4   -0.10    7.40
  -2  -8   4   11.80   10.20
  -2  -8   4   16.00    9.40
  -2  -8   4    7.10    8.00
  -2  -8   4   26.00    8.60
  -2  -8   4    1.40    9.30
   1   8  -4   46.60   10.50
   1   8  -4   32.50    7.60
   1   8  -4   22.70    8.50
  -1  -8   4   45.20   10.60
  -1  -8   4   29.00   12.10
  -1  -8   4   45.60   10.70
  -1  -8   4   36.20   11.00
  -1  -8   4   50.49   11.50
   0   8  -4  197.78   14.70
   0   8  -4  161.28   15.20
   0   8  -4  187.08   19.20
   0  -8   4  139.79   15.90
   0  -8   4  145.19   15.40
   0  -8   4  162.48   15.70
   0  -8   4  185.58   20.20
   0  -8   4  162.88   17.20
  -1   8  -4   -7.60    8.60
  -1   8  -4    3.40    6.90
   1  -8   4    9.80   10.90
   1  -8   4    4.40   10.20
   1  -8   4   -1.60   11.50
   1  -8   4   -5.60    7.90
  -2   8  -4   -5.30    8.30
  -2   8  -4   12.00    8.80
   2  -8   4   -7.80    7.00
   2  -8   4  -10.40   11.10
   2  -8   4    0.80   10.90
  -3   8  -4    6.90    9.10
  -3   8  -4   24.20   12.20
   3  -8   4   -1.50   12.10
   3  -8   4   19.50   16.50
   3  -8   4   23.70   10.60
  -4   8  -4   33.40   13.20
  -4   8  -4   41.40   12.90
   4  -8   4    8.00   14.70
   4  -8   4   10.60   14.60
   9   7  -4   20.20   10.30
   9   7  -4   17.90   12.70
  -9  -7   4   11.50   11.20
  -9  -7   4    9.80   10.30
  -9  -7   4    1.00   12.60
  -9  -7   4   17.20   11.10
   8   7  -4    0.30    8.20
   8   7  -4   10.30   10.40
  -8  -7   4    1.90    8.70
  -8  -7   4  -12.90    7.00
  -8  -7   4   13.60   10.40
  -8  -7   4    0.40   10.40
   7   7  -4   79.79   15.30
   7   7  -4   60.29   11.00
  -7  -7   4   57.99   13.90
  -7  -7   4   70.79   14.30
  -7  -7   4   54.69   11.90
  -7  -7   4   58.69   14.30
   6   7  -4  358.06   23.80
   6   7  -4  371.86   19.60
  -6  -7   4  436.86   25.40
  -6  -7   4  374.26   25.40
  -6  -7   4  370.26   21.00
  -6  -7   4  396.86   25.80
  -6  -7   4  370.76   24.80
   5   7  -4  416.36   20.70
   5   7  -4  433.56   24.90
  -5  -7   4  449.86   24.70
  -5  -7   4  465.95   26.60
  -5  -7   4  482.95   21.40
  -5  -7   4  440.76   26.40
  -5  -7   4  366.56   24.10
   4   7  -4  367.76   16.50
   4   7  -4  327.07   20.30
   4   7  -4  393.46   20.00
  -4  -7   4  269.37   19.30
  -4  -7   4  383.56   24.60
  -4  -7   4  335.67   21.60
  -4  -7   4  373.56   17.50
  -4  -7   4  371.16   21.60
   3   7  -4  923.11   23.00
   3   7  -4  900.01   30.30
   3   7  -4  913.01   33.10
  -3  -7   4  917.31   34.40
  -3  -7   4  927.61   27.40
  -3  -7   4  917.51   33.30
  -3  -7   4  951.00   36.60
  -3  -7   4  920.31   32.20
   2   7  -4   78.89   11.30
   2   7  -4   78.39   11.50
   2   7  -4   74.79    8.20
  -2  -7   4   61.29   11.40
  -2  -7   4   84.59   12.60
  -2  -7   4   76.49   13.50
  -2  -7   4   65.19   12.30
  -2  -7   4   79.29    9.90
   1   7  -4   26.10    8.70
   1   7  -4   21.00    6.20
  -1  -7   4   17.20    9.70
  -1  -7   4   18.70    8.20
  -1  -7   4   14.50    8.30
  -1  -7   4   17.30    8.30
  -1  -7   4    9.20    6.80
   0   7  -4   -0.30    5.30
   0   7  -4    4.60    7.70
   0  -7   4  -14.90    7.40
   0  -7   4   -1.90    6.60
   0  -7   4    4.20    8.10
   0  -7   4   -0.30    7.80
   0  -7   4    1.80    6.00
  -1   7  -4   15.90    6.50
  -1   7  -4   24.00    9.30
  -1   7  -4   16.80    7.20
   1  -7   4    4.20   10.20
   1  -7   4   22.10    8.30
   1  -7   4   25.60    7.30
   1  -7   4    8.80    8.50
   1  -7   4   23.80   10.20
  -2   7  -4   91.19   13.00
  -2   7  -4  119.59   15.50
   2  -7   4  112.49   15.00
   2  -7   4   92.79   14.20
   2  -7   4   92.59   16.20
  -3   7  -4   91.19   14.80
  -3   7  -4   80.89   13.30
   3  -7   4   88.09   15.30
   3  -7   4   96.09   17.50
   3  -7   4   90.79   14.10
  -4   7  -4  177.18   19.70
  -4   7  -4  107.49   15.80
   4  -7   4  120.79   17.60
   4  -7   4  122.59   21.50
   4  -7   4  129.89   16.80
  -5   7  -4    1.20    9.70
  -5   7  -4   27.70   12.40
   5  -7   4  -19.10   11.70
   5  -7   4  -21.90   14.90
   9   6  -4  169.88   20.50
   9   6  -4  165.48   21.80
  -9  -6   4  145.59   21.20
  -9  -6   4  187.58   22.50
  -9  -6   4  166.28   20.90
   8   6  -4   38.90   13.40
   8   6  -4   57.19   13.40
  -8  -6   4   43.30   13.10
  -8  -6   4   26.90   11.80
  -8  -6   4   39.80   12.30
  -8  -6   4   40.70   11.90
   7   6  -4  255.77   17.20
   7   6  -4  284.77   21.70
  -7  -6   4  271.37   20.00
  -7  -6   4  289.77   26.20
  -7  -6   4  283.47   22.60
  -7  -6   4  268.77   22.90
   6   6  -4   13.90    6.80
   6   6  -4   12.90    7.30
   6   6  -4   10.40    9.00
  -6  -6   4    5.40    8.60
  -6  -6   4  -11.70    7.50
  -6  -6   4    8.20    7.30
  -6  -6   4   23.40   10.00
  -6  -6   4    9.90    9.70
   5   6  -4   17.00    6.20
   5   6  -4   33.90    9.00
   5   6  -4   22.20    7.60
  -5  -6   4   30.00    9.60
  -5  -6   4   32.40   11.30
  -5  -6   4   10.50    8.00
  -5  -6   4   34.50   10.20
  -5  -6   4   22.60    7.50
   4   6  -4   75.49    8.20
   4   6  -4   83.19   10.70
   4   6  -4   59.79   10.60
  -4  -6   4   65.89   10.60
  -4  -6   4   71.19   11.10
  -4  -6   4   70.49   12.80
  -4  -6   4   70.09    9.20
  -4  -6   4   77.19   13.10
   3   6  -4  138.49   13.10
   3   6  -4  134.89   10.20
  -3  -6   4  154.98   14.60
  -3  -6   4  129.39   14.20
  -3  -6   4  147.19   16.20
  -3  -6   4  140.19   10.60
  -3  -6   4  115.09   13.80
   2   6  -4  570.74   17.40
   2   6  -4  543.35   21.90
  -2  -6   4  532.75   22.70
  -2  -6   4  605.74   25.80
  -2  -6   4  570.14   18.80
  -2  -6   4  537.25   23.90
  -2  -6   4  549.45   22.50
   1   6  -4  174.98   15.20
   1   6  -4  180.78   11.00
  -1  -6   4  186.88   11.90
  -1  -6   4  178.38   14.10
  -1  -6   4  178.18   14.80
  -1  -6   4  175.08   14.00
  -1  -6   4  179.28   16.20
   0   6  -4  235.58   13.60
   0   6  -4  207.78   14.90
   0  -6   4  230.98   13.80
   0  -6   4  235.78   16.20
   0  -6   4  196.08   15.40
   0  -6   4  190.68   13.90
   0  -6   4  215.28   15.50
  -1   6  -4  535.55   21.90
  -1   6  -4  545.95   23.80
   1  -6   4  544.55   24.10
   1  -6   4  569.64   21.60
   1  -6   4  566.84   26.10
   1  -6   4  564.34   21.40
   1  -6   4  534.45   21.80
  -2   6  -4   -2.20    6.50
  -2   6  -4    8.50    7.20
  -2   6  -4   -7.40    4.90
   2  -6   4   -3.90    7.20
   2  -6   4    5.80    5.30
   2  -6   4    2.20    5.10
   2  -6   4    2.00    8.40
   2  -6   4   11.70   10.10
  -3   6  -4  102.19   14.70
  -3   6  -4   88.69   14.20
   3  -6   4   99.69   14.20
   3  -6   4   94.79   17.40
   3  -6   4   89.79   14.00
  -4   6  -4   -3.00    8.20
  -4   6  -4   16.60   10.40
   4  -6   4    3.60    8.70
   4  -6   4    5.30   10.10
   4  -6   4    9.50   11.90
  -5   6  -4   81.29   15.00
  -5   6  -4   88.49   15.20
   5  -6   4  122.69   16.20
   5  -6   4   64.39   17.40
   5  -6   4   84.09   16.00
  -6   6  -4   53.29   13.30
  -6   6  -4   58.39   14.10
   6  -6   4   55.99   18.00
   6  -6   4   33.30   14.60
   9   5  -4   34.30   13.00
   9   5  -4   32.00   10.90
   9   5  -4   13.50   10.60
   9   5  -4   35.50   12.20
  -9  -5   4   16.90   10.20
  -9  -5   4   24.50   12.70
  -9  -5   4   27.90   11.80
   8   5  -4   98.89   17.00
   8   5  -4  105.29   15.40
   8   5  -4  117.89   13.50
  -8  -5   4   69.99   13.50
  -8  -5   4  138.09   18.70
  -8  -5   4  155.48   19.80
  -8  -5   4  130.29   17.70
   7   5  -4  134.59   17.90
   7   5  -4  156.48   18.10
   7   5  -4  100.49   12.00
   7   5  -4  116.19   13.30
  -7  -5   4  119.69   15.10
  -7  -5   4  127.69   17.10
  -7  -5   4   98.19   13.40
  -7  -5   4  130.89   18.20
  -7  -5   4  106.29   15.80
  -7  -5   4  112.19   16.30
   6   5  -4  112.59   14.40
   6   5  -4  108.79   12.10
   6   5  -4  105.79   11.40
  -6  -5   4  109.69   14.00
  -6  -5   4   90.29   13.80
  -6  -5   4  108.49   14.40
  -6  -5   4  112.89   15.30
  -6  -5   4  156.28   18.40
   5   5  -4   61.89    9.40
   5   5  -4   81.19    9.00
   5   5  -4   78.99   11.90
  -5  -5   4   67.19   11.50
  -5  -5   4   87.19   12.50
  -5  -5   4  101.29   15.00
  -5  -5   4   77.79   13.50
  -5  -5   4   81.49   10.40
   4   5  -4   31.00    6.50
   4   5  -4   45.50    8.30
  -4  -5   4   43.00    7.40
  -4  -5   4   48.80   10.50
  -4  -5   4   41.40    8.80
  -4  -5   4   36.10    9.10
  -4  -5   4   44.30    9.90
   3   5  -4  151.78    9.90
   3   5  -4  153.48   12.20
  -3  -5   4  169.58   14.00
  -3  -5   4  142.59   14.20
  -3  -5   4  162.58   12.80
  -3  -5   4  175.88   15.80
  -3  -5   4  141.39    9.80
   2   5  -4   65.09    9.30
   2   5  -4   62.59    8.10
  -2  -5   4   61.19    9.80
  -2  -5   4   75.09   11.10
  -2  -5   4   55.09    9.20
  -2  -5   4   63.19    7.00
  -2  -5   4   66.49   10.80
   1   5  -4    1.50    4.30
   1   5  -4   -1.70    4.80
  -1  -5   4    4.30    5.50
  -1  -5   4   -3.00    6.30
  -1  -5   4    7.20    4.80
  -1  -5   4  -10.10    5.10
  -1  -5   4    5.30    6.60
   0   5  -4  187.98   13.10
   0   5  -4  199.98   11.70
   0  -5   4  182.18   12.80
   0  -5   4  195.78   12.60
   0  -5   4  222.38   14.40
   0  -5   4  186.78   14.30
   0  -5   4  191.68   11.50
  -1   5  -4  587.74   21.40
  -1   5  -4  638.34   23.60
   1  -5   4  613.34   23.80
   1  -5   4  590.44   20.70
   1  -5   4  601.74   21.40
   1  -5   4  612.94   19.70
   1  -5   4  600.94   23.70
  -2   5  -4   30.10    8.70
  -2   5  -4   39.40    7.30
  -2   5  -4   33.30    8.50
   2  -5   4   40.40    6.90
   2  -5   4   28.70    7.90
   2  -5   4   26.30    6.40
   2  -5   4   22.10    9.70
   2  -5   4   12.30    7.10
  -3   5  -4  316.07   19.40
  -3   5  -4  324.37   18.90
   3  -5   4  304.37   18.00
   3  -5   4  353.36   14.70
   3  -5   4  330.87   19.40
   3  -5   4  318.27   20.80
  -4   5  -4  396.86   21.90
  -4   5  -4  386.96   22.50
   4  -5   4  391.36   23.60
   4  -5   4  360.36   21.40
   4  -5   4  379.06   21.80
  -5   5  -4  135.69   16.30
  -5   5  -4   94.09   16.00
   5  -5   4  140.39   18.30
   5  -5   4   90.79   14.50
   5  -5   4  181.98   18.20
  -6   5  -4   46.20   13.50
  -6   5  -4   36.00   10.90
   6  -5   4   17.90   10.60
   6  -5   4   15.50   11.50
   6  -5   4    8.20   12.30
  -7   5  -4   -0.60    9.60
  -7   5  -4   24.30   11.10
   7  -5   4    1.90   13.50
   7  -5   4    0.60   10.30
   9   4  -4  152.38   20.20
   9   4  -4  174.78   20.90
   9   4  -4  189.58   21.40
  -9  -4   4  158.98   20.00
  -9  -4   4  153.78   20.50
   8   4  -4  265.27   21.20
   8   4  -4  340.47   23.80
   8   4  -4  283.07   18.40
   8   4  -4  316.07   21.00
   8   4  -4  273.07   24.80
  -8  -4   4  315.27   21.80
  -8  -4   4  278.67   21.50
  -8  -4   4  289.07   19.80
  -8  -4   4  236.98   23.30
  -8  -4   4  274.67   22.10
   7   4  -4   10.60    8.80
   7   4  -4    7.50    6.60
   7   4  -4    1.10    7.90
   7   4  -4   18.50    7.60
   7   4  -4    6.70    7.70
  -7  -4   4    0.50    8.20
  -7  -4   4    7.80   10.30
  -7  -4   4   24.20    9.60
  -7  -4   4   14.90    9.00
  -7  -4   4    8.40    8.80
  -7  -4   4   14.40    9.90
  -7  -4   4    6.60    8.10
   6   4  -4   -2.70    6.50
   6   4  -4    8.40    6.20
   6   4  -4   -1.60    5.50
  -6  -4   4  -13.00    5.20
  -6  -4   4   -5.50    6.40
  -6  -4   4   -1.70    7.30
  -6  -4   4    6.10    7.40
  -6  -4   4   -4.60    6.60
  -6  -4   4   -0.80    7.30
  -6  -4   4    5.60    8.20
   5   4  -4    2.80    5.20
   5   4  -4    4.20    5.40
  -5  -4   4    2.40    5.50
  -5  -4   4   -2.80    6.50
  -5  -4   4   -4.60    6.40
  -5  -4   4    1.00    5.80
  -5  -4   4   -7.70    6.00
   4   4  -4  268.07   12.80
   4   4  -4  286.77   14.90
  -4  -4   4  238.18   15.40
  -4  -4   4  235.98   15.90
  -4  -4   4  277.87   17.60
  -4  -4   4  258.77   13.70
  -4  -4   4  277.77   15.80
   3   4  -4  572.74   20.20
   3   4  -4  580.64   18.00
  -3  -4   4  554.64   23.80
  -3  -4   4  560.74   22.50
  -3  -4   4  568.34   20.40
  -3  -4   4  559.54   17.80
  -3  -4   4  544.65   22.00
   2   4  -4  126.09   10.20
   2   4  -4  130.99   11.70
  -2  -4   4  109.99   11.60
  -2  -4   4  122.39    8.10
  -2  -4   4  118.29   12.80
  -2  -4   4  121.19   12.20
  -2  -4   4  133.39   11.30
   1   4  -4  214.38   13.40
   1   4  -4  209.98   12.70
  -1  -4   4  205.38   13.80
  -1  -4   4  214.88   14.50
  -1  -4   4  206.18   14.60
  -1  -4   4  195.08    9.30
  -1  -4   4  212.78   13.30
   0   4  -4   13.00    5.80
   0   4  -4   22.00    7.10
   0  -4   4   16.30    7.80
   0  -4   4   22.90    6.70
   0  -4   4   19.50    5.30
   0  -4   4   10.90    5.60
   0  -4   4   17.70    7.60
  -1   4  -4 1689.33   39.90
  -1   4  -4 1652.43   38.70
  -1   4  -4 1728.03   38.50
   1  -4   4 1624.84   34.20
   1  -4   4 1632.04   39.90
   1  -4   4 1742.43   39.90
   1  -4   4 1634.54   38.30
   1  -4   4 1628.24   37.50
  -2   4  -4  348.87   16.80
  -2   4  -4  338.07   16.80
  -2   4  -4  343.57   14.90
   2  -4   4  355.66   17.90
   2  -4   4  358.76   18.60
   2  -4   4  366.66   15.40
   2  -4   4  372.46   14.90
  -3   4  -4  102.99   11.70
  -3   4  -4   78.69   10.60
  -3   4  -4  107.89    8.60
   3  -4   4   98.89   10.80
   3  -4   4  107.49   13.00
   3  -4   4  112.49    9.40
   3  -4   4  112.99   12.80
  -4   4  -4  765.12   27.70
  -4   4  -4  753.62   29.50
   4  -4   4  810.52   28.80
   4  -4   4  706.23   28.30
   4  -4   4  733.43   27.10
  -5   4  -4  324.17   19.60
  -5   4  -4  288.97   20.30
   5  -4   4  286.97   21.80
   5  -4   4  295.87   20.10
   5  -4   4  296.87   20.30
  -6   4  -4   -1.90    7.30
  -6   4  -4    6.70    8.70
   6  -4   4    2.80    9.50
   6  -4   4    0.30    8.20
   6  -4   4    5.60    9.80
  -7   4  -4   -5.50    8.00
  -7   4  -4    3.00    9.10
   7  -4   4  -13.20    7.60
   7  -4   4    3.60   10.30
   7  -4   4   -0.90    8.30
   9   3  -4   14.40   10.70
   9   3  -4   -2.70    7.10
  -9  -3   4  -11.30    9.90
  -9  -3   4  -12.60    8.10
   8   3  -4    9.50    9.20
   8   3  -4   -2.70    7.70
   8   3  -4    0.80    8.60
   8   3  -4   10.10    7.80
   8   3  -4    8.30    9.50
  -8  -3   4  -11.00    7.70
  -8  -3   4    1.00   10.50
  -8  -3   4   12.70   10.10
   7   3  -4   18.50    8.20
   7   3  -4   -2.50    7.20
   7   3  -4    6.30    7.80
   7   3  -4    2.10    7.40
   7   3  -4    7.10    8.00
  -7  -3   4    3.00    8.90
  -7  -3   4    8.00    7.80
  -7  -3   4   19.30    8.90
  -7  -3   4    4.70    9.30
  -7  -3   4   15.80    8.70
  -7  -3   4    3.10    8.40
   6   3  -4    2.00    6.70
   6   3  -4    7.80    6.80
   6   3  -4    7.10    7.60
   6   3  -4   -1.90    7.40
   6   3  -4    8.30    6.30
  -6  -3   4   12.10    7.40
  -6  -3   4    6.80    7.40
  -6  -3   4   -0.70    7.40
  -6  -3   4   -5.00    7.40
  -6  -3   4   12.60    8.60
  -6  -3   4   16.00    8.50
  -6  -3   4   14.10    7.90
   5   3  -4   60.69    9.10
   5   3  -4   46.60    8.10
  -5  -3   4   67.79   11.20
  -5  -3   4   65.99   10.20
  -5  -3   4   59.29   10.20
  -5  -3   4   32.50    9.20
  -5  -3   4   60.59    9.90
  -5  -3   4   53.39   10.30
  -5  -3   4   56.39   10.50
   4   3  -4   87.19    9.40
   4   3  -4   74.59    9.30
  -4  -3   4   75.19    9.70
  -4  -3   4   66.89   10.00
  -4  -3   4   85.59   10.80
  -4  -3   4   79.89   11.50
  -4  -3   4   69.69   10.00
  -4  -3   4   78.69   10.20
  -4  -3   4   80.89    9.10
   3   3  -4   39.30    7.40
   3   3  -4   43.50    7.00
  -3  -3   4   51.99    9.10
  -3  -3   4   34.80    7.70
  -3  -3   4   37.80    8.40
  -3  -3   4   49.80    6.80
  -3  -3   4   34.70    6.90
   2   3  -4   27.30    6.50
   2   3  -4   27.80    6.50
  -2  -3   4   34.10    7.80
  -2  -3   4   20.40    7.10
  -2  -3   4   25.20    7.60
  -2  -3   4   49.99    7.40
  -2  -3   4   38.10    5.20
   1   3  -4   68.59    9.00
   1   3  -4   57.79    4.70
   1   3  -4   43.50    8.00
  -1  -3   4   57.49    9.20
  -1  -3   4   44.50    8.10
  -1  -3   4   42.20    8.20
  -1  -3   4   41.00    7.20
  -1  -3   4   45.80    4.20
   0   3  -4   -5.00    4.80
   0   3  -4    3.70    2.50
   0   3  -4   -5.10    5.80
   0   3  -4    1.40    6.60
   0  -3   4   13.50    6.50
   0  -3   4   11.20    5.90
   0  -3   4    2.50    5.60
   0  -3   4    0.10    3.70
   0  -3   4    4.80    6.20
  -1   3  -4   12.80    6.10
  -1   3  -4    5.00    6.10
  -1   3  -4   14.30    6.50
   1  -3   4    6.00    6.50
   1  -3   4   16.30    4.60
   1  -3   4   11.80    5.80
   1  -3   4   21.10    7.90
   1  -3   4   12.60    5.90
  -2   3  -4   11.20    5.20
  -2   3  -4    6.70    6.10
  -2   3  -4    6.00    5.30
   2  -3   4   11.60    5.00
   2  -3   4   19.80    5.30
   2  -3   4    2.60    6.70
   2  -3   4    8.90    6.30
  -3   3  -4   41.50    7.30
  -3   3  -4   40.90    7.80
  -3   3  -4   33.10    5.70
   3  -3   4   44.10    6.40
   3  -3   4   52.89    9.30
   3  -3   4   47.40    7.30
   3  -3   4   39.40    7.90
  -4   3  -4   47.10    8.50
  -4   3  -4   39.60    9.00
  -4   3  -4   63.69    6.10
   4  -3   4   43.70    9.40
   4  -3   4   69.89    9.90
   4  -3   4   56.99   10.00
   4  -3   4   51.49    6.70
  -5   3  -4  616.24   27.40
  -5   3  -4  608.14   24.10
   5  -3   4  614.44   25.80
   5  -3   4  534.35   25.10
   5  -3   4  657.53   25.50
  -6   3  -4   -0.30    7.90
  -6   3  -4   18.70    7.90
   6  -3   4   -1.90    7.90
   6  -3   4   11.60    9.10
   6  -3   4   20.00    9.40
  -7   3  -4  305.57   26.80
  -7   3  -4  257.67   19.40
   7  -3   4  260.97   21.60
   7  -3   4  233.38   21.20
   7  -3   4  284.17   21.40
  -8   3  -4   21.60   12.70
   8  -3   4   25.60   11.50
   8  -3   4   53.79   14.60
   8  -3   4   22.50   12.20
   9   2  -4  165.98   20.70
   9   2  -4  175.68   21.10
  -9  -2   4  196.68   23.10
   8   2  -4   29.50   10.00
   8   2  -4   11.10    9.20
   8   2  -4   49.90   12.60
  -8  -2   4   20.10   11.70
  -8  -2   4   13.20   10.20
   7   2  -4   38.50   10.30
   7   2  -4   70.99   12.30
   7   2  -4   60.59   12.10
   7   2  -4   48.90   11.10
   7   2  -4   51.99   10.00
  -7  -2   4   13.90    9.40
  -7  -2   4   36.10   11.70
  -7  -2   4   68.19   14.30
   6   2  -4  412.26   21.20
   6   2  -4  425.36   22.30
   6   2  -4  432.66   21.80
   6   2  -4  440.56   20.00
   6   2  -4  415.06   22.30
  -6  -2   4  436.16   23.50
  -6  -2   4  429.46   21.90
  -6  -2   4  429.76   21.60
  -6  -2   4  412.16   19.90
  -6  -2   4  490.75   25.10
  -6  -2   4  422.66   22.70
   5   2  -4  374.36   19.00
   5   2  -4  360.36   18.10
   5   2  -4  362.06   19.40
  -5  -2   4  381.66   19.90
  -5  -2   4  343.17   18.40
  -5  -2   4  357.36   18.70
  -5  -2   4  369.96   18.20
  -5  -2   4  354.36   18.70
  -5  -2   4  363.46   19.30
  -5  -2   4  370.46   20.00
   4   2  -4   17.90    6.90
   4   2  -4   11.00    4.90
   4   2  -4   18.30    6.40
  -4  -2   4   11.90    6.70
  -4  -2   4   -4.10    5.50
  -4  -2   4   12.70    5.70
  -4  -2   4   13.30    6.20
  -4  -2   4   14.10    5.90
  -4  -2   4   15.20    6.30
  -4  -2   4   14.90    6.60
   3   2  -4 1166.38   32.90
   3   2  -4 1126.79   29.00
  -3  -2   4 1098.49   31.00
  -3  -2   4 1088.19   29.60
  -3  -2   4 1142.29   30.60
  -3  -2   4 1104.79   31.70
  -3  -2   4 1090.99   27.10
  -3  -2   4 1088.09   30.20
  -3  -2   4 1130.59   28.70
   2   2  -4  419.26   18.80
   2   2  -4  459.15   17.10
   2   2  -4  429.86   15.70
  -2  -2   4  436.86   13.20
  -2  -2   4  434.76   17.40
  -2  -2   4  451.65   18.80
  -2  -2   4  448.46   18.80
  -2  -2   4  413.36   14.60
  -2  -2   4  454.25   17.50
   1   2  -4  106.09    9.30
   1   2  -4   90.39    4.50
   1   2  -4   85.89    8.40
   1   2  -4  116.39   11.60
  -1  -2   4  101.79    7.20
  -1  -2   4  102.39   10.30
  -1  -2   4   99.19   10.40
  -1  -2   4   85.99    4.30
  -1  -2   4   89.59    9.20
   0   2  -4  265.97   13.70
   0   2  -4  307.17   13.30
   0   2  -4  320.47   13.30
   0  -2   4  285.07   13.10
   0  -2   4  294.57   13.70
   0  -2   4  293.47   10.60
   0  -2   4  313.67   13.80
  -1   2  -4   -2.90    5.20
  -1   2  -4    5.40    4.40
  -1   2  -4    3.50    5.00
   1  -2   4    0.80    2.40
   1  -2   4    1.70    2.80
   1  -2   4   -2.00    4.00
   1  -2   4    5.30    5.10
   1  -2   4   -9.10    5.30
  -2   2  -4    4.40    6.60
  -2   2  -4    7.50    5.40
  -2   2  -4    0.10    1.90
   2  -2   4   13.80    7.10
   2  -2   4   10.00    5.50
   2  -2   4    7.60    4.40
   2  -2   4   23.30    6.10
  -3   2  -4   16.90    5.10
  -3   2  -4   21.10    6.50
  -3   2  -4   20.40    5.80
   3  -2   4   15.20    6.40
   3  -2   4   32.40    8.40
   3  -2   4   17.00    5.50
   3  -2   4   21.80    5.40
  -4   2  -4  127.29   10.80
  -4   2  -4   82.19   10.50
  -4   2  -4  105.99    7.50
   4  -2   4  100.49    8.10
   4  -2   4  111.49   11.40
   4  -2   4  104.69   11.70
   4  -2   4  115.19   11.80
  -5   2  -4   47.30    9.70
  -5   2  -4   42.20    7.80
   5  -2   4   46.80    9.60
   5  -2   4   64.59   11.00
   5  -2   4   40.90    6.40
   5  -2   4   51.59    9.90
  -6   2  -4   48.20   10.80
  -6   2  -4   54.69    9.50
   6  -2   4   56.59   11.30
   6  -2   4   60.79   11.30
   6  -2   4   66.59   12.50
  -7   2  -4  522.85   23.20
  -7   2  -4  474.25   26.90
   7  -2   4  482.65   25.70
   7  -2   4  490.65   25.90
   7  -2   4  562.64   29.20
  -8   2  -4   23.10   12.00
   8  -2   4    6.30   10.90
   8  -2   4    7.50   10.30
   8  -2   4   16.60   10.60
  -9   2  -4    0.90    9.80
   9  -2   4   -1.50    9.80
   9  -2   4   -0.80   10.20
   9  -2   4  -13.10    9.10
   9   1  -4  410.46   27.90
   9   1  -4  384.86   27.00
  -9  -1   4  398.16   30.80
   8   1  -4  168.58   19.40
   8   1  -4  145.49   19.00
  -8  -1   4  141.59   20.30
  -8  -1   4  148.59   18.80
   7   1  -4   27.20   10.30
   7   1  -4   10.80    9.20
   7   1  -4   17.40    8.60
  -7  -1   4   24.30   11.70
  -7  -1   4   38.00   11.30
   6   1  -4  611.94   26.30
   6   1  -4  593.44   25.80
   6   1  -4  651.03   23.40
   6   1  -4  625.74   25.00
   6   1  -4  643.44   25.70
  -6  -1   4  590.24   28.50
  -6  -1   4  626.74   28.00
  -6  -1   4  629.04   23.20
   5   1  -4  470.85   21.00
   5   1  -4  452.15   20.40
   5   1  -4  431.26   19.20
   5   1  -4  411.26   19.70
  -5  -1   4  442.36   18.40
  -5  -1   4  442.36   19.40
  -5  -1   4  434.76   22.10
  -5  -1   4  457.75   23.20
   4   1  -4   29.90    6.70
   4   1  -4   19.30    6.20
   4   1  -4   25.00    7.20
  -4  -1   4   40.50    7.30
  -4  -1   4   27.10    7.00
  -4  -1   4   27.10    6.60
  -4  -1   4   25.60    8.40
  -4  -1   4   27.60    8.20
   3   1  -4   99.69   11.50
   3   1  -4   87.19   10.20
   3   1  -4   99.69    9.10
   3   1  -4   86.99    8.90
  -3  -1   4   75.49   10.00
  -3  -1   4   98.99   10.10
  -3  -1   4   89.29   10.90
  -3  -1   4   87.19    9.20
  -3  -1   4   99.59    9.60
   2   1  -4 1279.17   30.70
   2   1  -4 1263.07   26.60
   2   1  -4 1213.08   32.90
  -2  -1   4 1318.07   31.50
  -2  -1   4 1274.27   29.40
  -2  -1   4 1307.77   27.90
  -2  -1   4 1271.37   32.90
  -2  -1   4 1274.37   32.50
   1   1  -4  298.07    8.80
   1   1  -4  308.87    9.10
   1   1  -4  297.47   12.90
   1   1  -4  298.27    8.50
   1   1  -4  296.07   14.40
  -1  -1   4  312.37   12.40
  -1  -1   4  322.67    9.50
  -1  -1   4  324.17   14.10
  -1  -1   4  307.37   13.20
   0   1  -4 1833.12   30.00
   0   1  -4 1769.72   36.50
   0   1  -4 1782.62   39.30
   0   1  -4 1818.82   36.40
   0  -1   4 1806.22   37.70
   0  -1   4 1804.92   30.30
   0  -1   4 1868.11   36.70
   0  -1   4 1859.31   37.60
  -1   1  -4   81.09    8.60
  -1   1  -4   67.49    6.40
  -1   1  -4   69.69    4.90
  -1   1  -4   70.99    8.00
  -1   1  -4   62.69    3.80
   1  -1   4   69.49    7.40
   1  -1   4   69.99    3.90
   1  -1   4   74.69    5.20
   1  -1   4   71.89    7.90
  -2   1  -4   18.40    4.90
  -2   1  -4   16.00    4.10
  -2   1  -4   18.50    5.70
  -2   1  -4   25.10    6.80
   2  -1   4   17.40    4.80
   2  -1   4   16.30    5.10
   2  -1   4   16.10    6.00
  -3   1  -4   98.69    9.00
  -3   1  -4  100.59   11.00
  -3   1  -4   88.19    8.00
  -3   1  -4  102.09    9.00
   3  -1   4  111.39   10.00
   3  -1   4  102.89   11.40
   3  -1   4   93.99    9.10
  -4   1  -4   51.99    6.60
  -4   1  -4   47.30    7.60
  -4   1  -4   43.20    7.90
  -4   1  -4   52.39    6.70
   4  -1   4   53.09    9.30
   4  -1   4   55.19    8.90
   4  -1   4   45.70    6.80
  -5   1  -4   96.79    7.60
  -5   1  -4   90.79   11.00
  -5   1  -4   93.39   11.80
  -5   1  -4  106.29    9.70
   5  -1   4  130.79   13.10
   5  -1   4   98.89   11.70
   5  -1   4  110.19   12.40
   5  -1   4  104.29    9.30
  -6   1  -4   11.00    7.60
  -6   1  -4    8.20    5.60
  -6   1  -4    4.10    6.60
   6  -1   4   21.20    8.90
   6  -1   4    2.90    6.70
   6  -1   4   16.60    9.20
   6  -1   4   11.50    5.60
  -7   1  -4   -2.00    7.50
  -7   1  -4   -9.00    6.40
   7  -1   4   12.50    8.70
   7  -1   4   13.60   10.00
   7  -1   4    9.20    8.60
  -8   1  -4  191.88   21.30
  -8   1  -4  187.48   21.00
   8  -1   4  198.28   20.40
   8  -1   4  163.98   19.70
   8  -1   4  156.08   18.70
  -9   1  -4   51.29   13.50
   9  -1   4   31.60   12.70
   9  -1   4   20.50   12.60
   9  -1   4   29.10   12.80
   8   0  -4   -0.80    8.40
   8   0  -4   -1.00    8.60
  -8   0   4    3.50   11.80
  -8   0   4    1.10   10.70
   7   0  -4    5.20    8.80
   7   0  -4    9.10    8.30
  -7   0   4    9.70   10.40
  -7   0   4   23.50   11.40
   6   0  -4  256.47   19.70
   6   0  -4  243.88   17.00
   6   0  -4  292.57   20.30
   6   0  -4  269.27   18.40
  -6   0   4  262.57   20.70
  -6   0   4  301.27   23.40
   5   0  -4  276.37   14.40
   5   0  -4  259.17   15.80
   5   0  -4  262.77   17.30
   5   0  -4  258.37   15.90
  -5   0   4  238.68   19.70
  -5   0   4  270.57   13.90
  -5   0   4  254.77   19.10
   4   0  -4  229.28   14.20
   4   0  -4  220.58   13.50
   4   0  -4  228.38   12.20
   4   0  -4  209.58   12.90
  -4   0   4  201.18   16.10
  -4   0   4  194.28   11.60
  -4   0   4  197.18   15.80
  -4   0   4  221.98   12.00
   3   0  -4  898.21   27.30
   3   0  -4  946.41   25.80
   3   0  -4  941.51   24.70
  -3   0   4  941.31   24.70
  -3   0   4  914.91   29.50
  -3   0   4  914.81   29.30
  -3   0   4  911.41   23.50
   2   0  -4    6.80    6.60
   2   0  -4   19.20    4.40
   2   0  -4   14.90    5.00
   2   0  -4   13.10    6.90
  -2   0   4   27.00    7.90
  -2   0   4   22.70    8.00
  -2   0   4   25.00    6.40
  -2   0   4   20.60    5.30
   1   0  -4  276.17    8.50
   1   0  -4  282.27   13.10
   1   0  -4  293.37   10.00
   1   0  -4  278.17    8.10
   1   0  -4  269.17   13.70
  -1   0   4  302.57   12.70
  -1   0   4  281.37   13.80
  -1   0   4  295.87   10.80
   0   0  -4 1734.13   29.10
   0   0  -4 1638.04   37.00
   0   0  -4 1715.03   34.80
   0   0   4 1667.93   34.90
   0   0   4 1692.03   36.20
   0   0   4 1714.03   29.00
   0   0   4 1659.23   32.60
  -1   0  -4   34.00    3.40
  -1   0  -4   26.10    5.20
  -1   0  -4   35.30    4.80
  -1   0  -4   34.30    6.30
   1   0   4   37.10    3.30
   1   0   4   30.70    5.40
   1   0   4   37.60    5.90
   1   0   4   31.10    4.90
   1   0   4   30.60    2.70
   1   0   4   29.90    3.50
  -2   0  -4  180.98    8.40
  -2   0  -4  193.58    8.40
  -2   0  -4  176.98   10.50
  -2   0  -4  173.28   10.90
   2   0   4  177.78    8.10
   2   0   4  182.58   10.50
   2   0   4  189.48   11.00
  -3   0  -4    4.30    5.20
  -3   0  -4    0.60    3.60
  -3   0  -4    1.80    6.20
  -3   0  -4   -2.50    4.30
   3   0   4    2.30    5.60
   3   0   4    0.70    5.40
   3   0   4    7.20    5.10
  -4   0  -4  202.88   13.00
  -4   0  -4  191.68   11.30
  -4   0  -4  194.88   12.60
  -4   0  -4  179.08    9.10
   4   0   4  201.38   12.00
   4   0   4  182.38   12.70
   4   0   4  204.18   14.40
  -5   0  -4   -1.00    4.70
  -5   0  -4   -1.60    5.10
  -5   0  -4   -0.10    3.80
  -5   0  -4    3.80    3.50
   5   0   4   -3.20    5.30
   5   0   4    3.60    4.20
   5   0   4   -1.30    5.10
  -6   0  -4  102.09   13.40
  -6   0  -4  108.89    8.90
  -6   0  -4  120.19   13.10
  -6   0  -4  120.29    9.10
   6   0   4  144.69   15.30
   6   0   4  129.99   11.40
   6   0   4  127.39   14.70
  -7   0  -4   39.60   11.30
  -7   0  -4   50.89   10.70
   7   0   4   47.30   11.70
   7   0   4   68.39   12.60
   7   0   4   70.69    9.70
  -8   0  -4    3.90    9.10
  -8   0  -4   10.10   10.40
   8   0   4   18.20   10.40
   8   0   4   -5.60    8.20
   8   0   4   13.70    9.20
  -9   0  -4   38.90   12.20
  -9   0  -4   23.40   11.40
   9   0   4   29.50   11.60
   9   0   4   52.19   13.80
   9   0   4   27.20   11.40
   8  -1  -4    7.70   10.40
   8  -1  -4    3.80    9.60
  -8   1   4   -0.20   10.90
  -8   1   4    9.10   13.30
   7  -1  -4    2.10    9.80
   7  -1  -4   -5.60    7.60
  -7   1   4  -11.50   10.20
  -7   1   4    5.70   10.80
   6  -1  -4   -0.90    6.90
   6  -1  -4   -8.10    8.40
  -6   1   4  -10.10    7.60
  -6   1   4    4.10    8.70
   5  -1  -4    5.90    6.40
   5  -1  -4   13.30    8.00
   5  -1  -4    8.40    6.20
  -5   1   4   14.70    9.70
  -5   1   4   -2.40    7.80
   4  -1  -4   66.69    9.50
   4  -1  -4   61.19    7.20
   4  -1  -4   61.69    9.20
   4  -1  -4   70.49   10.20
  -4   1   4   50.89   10.50
  -4   1   4   66.79   11.70
  -4   1   4   48.90    6.90
   3  -1  -4  909.81   26.80
   3  -1  -4  890.01   26.60
   3  -1  -4  898.31   24.80
   3  -1  -4  907.51   21.60
  -3   1   4  941.91   23.70
  -3   1   4  945.11   31.00
  -3   1   4  904.21   30.60
   2  -1  -4   40.40    7.60
   2  -1  -4   35.10    6.90
   2  -1  -4   31.00    5.00
  -2   1   4   41.80    4.90
  -2   1   4   23.30    7.40
  -2   1   4   35.90    6.30
  -2   1   4   29.30    7.90
   1  -1  -4    1.30    6.10
   1  -1  -4    1.90    4.80
   1  -1  -4    6.60    3.10
   1  -1  -4   -0.20    5.90
  -1   1   4   13.60    7.10
  -1   1   4    7.10    6.30
  -1   1   4    5.60    3.10
  -1   1   4    0.70    3.20
  -1   1   4    3.60    4.70
   0  -1  -4  525.95   14.40
   0  -1  -4  520.65   10.10
   0  -1  -4  487.55   18.30
   0  -1  -4  553.14   17.40
   0   1   4  513.05   10.30
   0   1   4  521.25   16.40
   0   1   4  503.25   18.20
   0   1   4  513.45   13.40
  -1  -1  -4 5582.74   83.59
  -1  -1  -4 5646.94   87.29
  -1  -1  -4 5480.05   90.89
  -1  -1  -4 5415.96   94.89
   1   1   4 5491.95   92.29
   1   1   4 5609.34   91.59
   1   1   4 5603.94   89.49
   1   1   4 5607.14   82.99
  -2  -1  -4  158.88    7.70
  -2  -1  -4  146.79    7.30
  -2  -1  -4  156.08    8.10
  -2  -1  -4  138.29   10.40
  -2  -1  -4  159.18   10.00
   2   1   4  161.78    8.40
   2   1   4  149.09   10.10
   2   1   4  149.29    7.40
   2   1   4  165.88    9.80
   2   1   4  152.58    7.30
  -3  -1  -4    5.40    5.00
  -3  -1  -4    7.40    5.40
  -3  -1  -4    4.60    5.40
  -3  -1  -4    6.50    3.20
  -3  -1  -4    5.60    4.60
   3   1   4    4.70    5.00
   3   1   4    7.00    4.40
   3   1   4    6.20    5.40
  -4  -1  -4   -2.00    2.70
  -4  -1  -4   -2.40    5.40
  -4  -1  -4    3.20    5.40
  -4  -1  -4    2.10    5.60
   4   1   4    2.10    4.80
   4   1   4    4.80    5.50
   4   1   4    3.80    5.90
  -5  -1  -4   55.49    8.90
  -5  -1  -4   29.70    7.00
  -5  -1  -4   33.50    6.60
  -5  -1  -4   30.00    4.10
   5   1   4   32.60    8.10
   5   1   4   43.40    7.90
   5   1   4   26.40    8.00
  -6  -1  -4    1.90    5.00
  -6  -1  -4    9.20    3.50
  -6  -1  -4    2.00    7.00
  -6  -1  -4   15.40    5.80
   6   1   4   23.30    8.50
   6   1   4    8.10    6.60
   6   1   4    0.70    5.30
  -7  -1  -4   51.99   10.40
  -7  -1  -4   42.20   10.50
  -7  -1  -4   60.59    8.60
   7   1   4   53.69   11.70
   7   1   4   54.89    9.40
   7   1   4   59.49   12.20
  -8  -1  -4   50.89   12.30
  -8  -1  -4   62.19   12.10
   8   1   4   78.49   15.10
   8   1   4   66.49   14.00
   8   1   4   75.49   10.90
  -9  -1  -4    0.40    8.10
  -9  -1  -4    6.40    9.20
   9   1   4    1.00    9.50
   9   1   4   -7.60    9.00
   9   1   4    8.20    9.10
 -10  -1  -4   48.00   13.40
 -10  -1  -4   50.59   14.50
  10   1   4   66.69   15.70
  10   1   4   54.39   14.40
  10   1   4   31.70   13.30
   7  -2  -4  -23.50    7.30
   7  -2  -4  -14.20    8.20
  -7   2   4   -0.50   10.60
  -7   2   4   -9.00   11.20
   6  -2  -4   31.70   10.60
   6  -2  -4   -3.30    7.70
  -6   2   4   13.70   12.50
  -6   2   4    8.20    9.70
   5  -2  -4    3.20    7.90
   5  -2  -4   -5.90    6.40
  -5   2   4   21.40   10.30
  -5   2   4   -6.80    9.20
   4  -2  -4    4.70    7.60
   4  -2  -4    5.90    5.80
   4  -2  -4   12.40    6.00
  -4   2   4    6.30    4.10
  -4   2   4    0.20    8.30
  -4   2   4   12.60    8.20
   3  -2  -4  165.18   12.80
   3  -2  -4  143.09    6.30
   3  -2  -4  173.88   11.80
   3  -2  -4  160.88   11.50
  -3   2   4  197.68   17.60
  -3   2   4  168.18   16.60
  -3   2   4  150.38    9.10
   2  -2  -4  522.25   19.40
   2  -2  -4  511.85   16.90
   2  -2  -4  503.75   19.30
   2  -2  -4  495.55    9.80
   2  -2  -4  493.65   10.20
  -2   2   4  467.55   21.00
  -2   2   4  503.25   15.70
  -2   2   4  467.15   20.90
   1  -2  -4  175.58    9.20
   1  -2  -4  177.08   12.60
   1  -2  -4  175.38    5.40
   1  -2  -4  178.08   12.70
  -1   2   4  211.88   14.40
  -1   2   4  187.08    5.70
  -1   2   4  173.38   10.80
  -1   2   4  206.18   13.90
   0  -2  -4   40.20    4.20
   0  -2  -4   38.40    7.60
   0  -2  -4   39.60    5.30
   0  -2  -4   32.90    6.70
   0  -2  -4   48.20    7.80
   0   2   4   40.80    4.30
   0   2   4   47.60    4.60
   0   2   4   31.50    7.20
   0   2   4   40.20    7.50
   0   2   4   35.60    6.70
  -1  -2  -4 1142.19   25.90
  -1  -2  -4 1131.69   26.50
  -1  -2  -4 1142.79   22.10
  -1  -2  -4 1165.88   30.80
   1   2   4 1144.19   28.00
   1   2   4 1173.38   21.80
   1   2   4 1137.29   27.70
   1   2   4 1144.59   24.10
  -2  -2  -4 1506.45   30.80
  -2  -2  -4 1419.56   28.50
  -2  -2  -4 1421.46   35.30
  -2  -2  -4 1476.45   30.70
   2   2   4 1396.76   31.30
   2   2   4 1460.55   30.60
   2   2   4 1471.05   33.30
  -3  -2  -4 1084.09   26.90
  -3  -2  -4 1072.39   26.50
  -3  -2  -4 1120.59   26.70
  -3  -2  -4 1064.49   29.80
   3   2   4 1074.99   28.30
   3   2   4 1089.59   22.30
   3   2   4 1065.99   28.60
  -4  -2  -4  212.08   12.30
  -4  -2  -4  273.47   15.50
  -4  -2  -4  245.78   14.40
  -4  -2  -4  241.18   14.00
  -4  -2  -4  241.88    6.90
  -4  -2  -4  241.28    7.50
   4   2   4  254.47   15.50
   4   2   4  242.08   14.30
  -5  -2  -4 1635.44   41.40
  -5  -2  -4 1638.44   40.80
  -5  -2  -4 1663.43   40.00
  -5  -2  -4 1668.43   37.20
   5   2   4 1589.74   39.10
   5   2   4 1577.14   40.40
   5   2   4 1587.74   41.90
  -6  -2  -4  344.87   19.20
  -6  -2  -4  356.96   17.10
  -6  -2  -4  359.26   18.90
   6   2   4  376.46   18.00
   6   2   4  337.27   19.30
   6   2   4  324.97   18.20
  -7  -2  -4  248.48   16.20
  -7  -2  -4  218.98   17.80
  -7  -2  -4  257.47   15.80
   7   2   4  242.58   19.00
   7   2   4  265.77   16.70
   7   2   4  263.67   19.40
  -8  -2  -4  156.78   18.10
  -8  -2  -4  170.08   16.90
   8   2   4  198.08   20.70
   8   2   4  185.18   16.60
   8   2   4  173.28   18.90
  -9  -2  -4   14.90    9.10
  -9  -2  -4  -14.20    7.70
   9   2   4   13.60   10.70
   9   2   4    4.40   10.20
 -10  -2  -4   50.59   13.00
 -10  -2  -4   71.49   16.10
  10   2   4   49.00   15.10
  10   2   4   53.99   15.00
   7  -3  -4   -8.00   10.70
   7  -3  -4   -0.40   10.00
  -7   3   4  -15.70    9.20
  -7   3   4  -11.40   11.50
   6  -3  -4    1.20    9.50
   6  -3  -4   -2.80    8.30
  -6   3   4    4.20   10.50
  -6   3   4    8.00   11.20
   5  -3  -4  132.39   15.60
   5  -3  -4  116.79   16.20
  -5   3   4  104.19   16.20
  -5   3   4  125.39   19.00
   4  -3  -4   22.00    9.50
   4  -3  -4   10.10    7.80
  -4   3   4   16.80   10.00
  -4   3   4    1.10    7.90
   3  -3  -4   39.60    8.30
   3  -3  -4   39.00   10.30
   3  -3  -4   38.90    7.70
  -3   3   4   46.30    5.90
  -3   3   4   37.40   10.00
  -3   3   4   26.30    9.00
   2  -3  -4   65.19   10.20
   2  -3  -4   70.39    8.60
   2  -3  -4   52.09    8.50
  -2   3   4   63.29    6.90
  -2   3   4   81.09   12.00
  -2   3   4   70.59   11.10
   1  -3  -4    2.00    5.40
   1  -3  -4    1.40    5.40
   1  -3  -4    3.90    6.40
  -1   3   4    5.80    6.00
  -1   3   4   -3.30    3.90
  -1   3   4   -8.10    5.50
   0  -3  -4  312.47   15.60
   0  -3  -4  280.37   14.80
   0  -3  -4  291.57   16.20
   0  -3  -4  287.97   12.70
   0   3   4  283.67   15.60
   0   3   4  303.67   13.50
   0   3   4  287.87    7.50
   0   3   4  299.37   16.20
   0   3   4  291.07    7.80
  -1  -3  -4  619.24   20.90
  -1  -3  -4  616.74   23.20
  -1  -3  -4  616.64   16.90
  -1  -3  -4  607.74   19.30
   1   3   4  615.94   15.80
   1   3   4  612.24   20.10
   1   3   4  657.23   21.40
  -2  -3  -4 2798.02   58.49
  -2  -3  -4 2815.42   50.99
  -2  -3  -4 2880.61   50.39
  -2  -3  -4 2768.02   52.89
   2   3   4 2801.82   52.39
   2   3   4 2743.13   55.19
   2   3   4 2798.52   51.89
  -3  -3  -4    9.00    5.40
  -3  -3  -4   15.20    6.30
  -3  -3  -4   11.20    7.50
  -3  -3  -4   19.70    7.40
   3   3   4   21.00    7.40
   3   3   4   22.00    6.50
   3   3   4   13.90    4.50
  -4  -3  -4  198.98   14.70
  -4  -3  -4  146.69   10.20
  -4  -3  -4  171.68    6.50
  -4  -3  -4  163.88   12.30
  -4  -3  -4  173.48   12.40
   4   3   4  172.28   12.70
   4   3   4  164.68    6.90
   4   3   4  167.48   13.10
  -5  -3  -4   27.70    5.70
  -5  -3  -4   36.50    8.00
  -5  -3  -4   27.70    7.80
  -5  -3  -4   14.30    7.00
   5   3   4   28.80    7.40
   5   3   4   29.40    7.30
  -6  -3  -4 1103.99   35.60
  -6  -3  -4 1156.28   29.90
  -6  -3  -4 1125.69   33.70
  -6  -3  -4 1074.89   34.30
   6   3   4 1110.99   34.80
   6   3   4 1115.19   33.50
  -7  -3  -4  506.95   22.80
  -7  -3  -4  475.25   25.00
  -7  -3  -4  517.95   21.00
  -7  -3  -4  525.95   26.40
   7   3   4  519.85   23.40
   7   3   4  484.45   25.30
   7   3   4  498.45   25.60
  -8  -3  -4  516.65   27.70
  -8  -3  -4  528.65   23.50
  -8  -3  -4  479.65   22.60
  -8  -3  -4  553.64   28.70
   8   3   4  542.15   28.80
   8   3   4  500.65   26.90
   8   3   4  493.25   23.80
  -9  -3  -4  248.78   24.30
  -9  -3  -4  270.27   19.90
   9   3   4  271.47   25.90
   9   3   4  277.87   19.20
   9   3   4  272.37   24.90
 -10  -3  -4   30.10   10.70
 -10  -3  -4   53.69   14.30
  10   3   4   38.90   13.00
  10   3   4   37.80   14.20
   6  -4  -4  154.78   18.80
   6  -4  -4  170.28   22.50
  -6   4   4  155.28   21.40
  -6   4   4  153.78   23.10
   5  -4  -4  -10.30    8.80
   5  -4  -4   -4.80    9.60
  -5   4   4   15.80   12.00
  -5   4   4    5.20   10.30
   4  -4  -4   58.09   11.70
   4  -4  -4   50.29   13.00
  -4   4   4   82.99   15.60
  -4   4   4   90.29   14.80
   3  -4  -4  302.87   16.40
   3  -4  -4  303.87   18.20
   3  -4  -4  298.07   20.20
  -3   4   4  262.67   20.00
  -3   4   4  308.17   22.10
   2  -4  -4    4.10    7.50
   2  -4  -4   -7.80    6.50
   2  -4  -4    8.10    5.60
  -2   4   4    2.50    7.20
  -2   4   4   -0.60    6.20
  -2   4   4   -3.50    3.50
   1  -4  -4   44.70    8.20
   1  -4  -4   68.49    9.50
   1  -4  -4   90.39   12.10
  -1   4   4   74.29   11.00
  -1   4   4   75.29   11.10
  -1   4   4   82.89    8.10
   0  -4  -4   68.59    8.50
   0  -4  -4   74.09    9.90
   0  -4  -4   66.89   10.80
   0   4   4   62.09    7.80
   0   4   4   72.69    9.90
   0   4   4   62.49    9.40
  -1  -4  -4   11.30    7.50
  -1  -4  -4   13.20    5.50
  -1  -4  -4   11.00    5.70
  -1  -4  -4   23.80    7.70
   1   4   4   17.30    6.10
   1   4   4    6.70    5.70
   1   4   4   15.90    6.20
   1   4   4   12.00    3.80
  -2  -4  -4   52.59    7.00
  -2  -4  -4   48.60    9.30
  -2  -4  -4   49.90    7.60
  -2  -4  -4   56.59    9.80
   2   4   4   56.59    8.40
   2   4   4   51.69    6.80
   2   4   4   52.09    8.70
  -3  -4  -4 1851.41   46.60
  -3  -4  -4 1931.71   40.50
  -3  -4  -4 1859.91   36.90
  -3  -4  -4 1880.71   42.20
   3   4   4 1906.81   41.80
   3   4   4 1928.11   44.40
   3   4   4 1819.32   37.90
  -4  -4  -4  517.45   20.60
  -4  -4  -4  574.04   20.80
  -4  -4  -4  534.55   17.10
  -4  -4  -4  511.95   23.20
   4   4   4  583.44   22.20
   4   4   4  557.94   15.10
   4   4   4  590.94   22.40
  -5  -4  -4  183.58   15.30
  -5  -4  -4  187.58   10.10
  -5  -4  -4  190.98   14.10
  -5  -4  -4  187.98   13.40
   5   4   4  182.78   14.50
   5   4   4  171.18   13.40
  -6  -4  -4    3.60    6.60
  -6  -4  -4   15.80    7.30
  -6  -4  -4    7.80    4.60
  -6  -4  -4    2.50    5.90
   6   4   4   -0.50    5.60
   6   4   4    8.50    7.40
  -7  -4  -4    5.90    7.30
  -7  -4  -4   11.10    7.70
  -7  -4  -4   18.10    6.50
  -7  -4  -4   15.70    7.70
   7   4   4   11.10    8.50
   7   4   4   12.70    7.40
  -8  -4  -4  386.46   22.10
  -8  -4  -4  405.66   19.60
  -8  -4  -4  374.16   24.60
  -8  -4  -4  395.16   25.80
   8   4   4  376.56   23.90
   8   4   4  381.06   24.90
   8   4   4  413.86   23.00
  -9  -4  -4   99.69   13.90
  -9  -4  -4   95.29   16.40
  -9  -4  -4   94.79   15.70
  -9  -4  -4  102.09   13.40
   9   4   4   94.19   14.10
   9   4   4  113.19   17.00
   9   4   4   96.39   16.00
 -10  -4  -4   15.60    8.20
 -10  -4  -4  -10.40    8.90
  10   4   4    7.30   11.20
  10   4   4    4.20    9.70
  10   4   4   11.00    8.80
 -11  -4  -4   52.79   15.50
  11   4   4   71.49   17.50
  11   4   4   89.89   18.70
   5  -5  -4  328.87   24.80
   5  -5  -4  350.06   26.40
  -5   5   4  332.07   30.90
  -5   5   4  286.27   27.10
   4  -5  -4   25.80   12.00
   4  -5  -4   10.50   11.00
  -4   5   4    2.70    9.50
  -4   5   4   21.20   11.50
   3  -5  -4   48.30   12.80
   3  -5  -4   78.19   15.50
  -3   5   4   66.59   14.70
  -3   5   4   68.29   14.40
   2  -5  -4   23.20    8.00
   2  -5  -4   27.30   10.70
   2  -5  -4   38.00   11.70
  -2   5   4   13.00    9.20
  -2   5   4   28.60   10.20
   1  -5  -4   -7.90    8.10
   1  -5  -4   -3.90    7.00
   1  -5  -4    1.90    6.00
  -1   5   4    5.80    4.60
  -1   5   4    5.70    6.40
  -1   5   4   -2.90    6.10
   0  -5  -4    9.90    8.00
   0  -5  -4   14.60    6.80
   0  -5  -4   20.90    7.30
   0   5   4    8.00    6.30
   0   5   4   19.00    5.70
   0   5   4   14.60    7.40
  -1  -5  -4   -0.40    7.00
  -1  -5  -4   -3.30    5.00
  -1  -5  -4   -0.60    5.10
  -1  -5  -4   -0.50    4.30
   1   5   4    9.70    5.10
   1   5   4    5.80    5.60
   1   5   4    5.70    3.10
   1   5   4    7.50    5.70
  -2  -5  -4  575.54   24.40
  -2  -5  -4  611.54   20.80
  -2  -5  -4  619.34   22.90
  -2  -5  -4  604.74   18.90
   2   5   4  603.34   18.50
   2   5   4  641.04   22.50
   2   5   4  614.64   21.90
  -3  -5  -4  919.41   26.40
  -3  -5  -4  911.51   31.40
  -3  -5  -4  890.31   22.50
  -3  -5  -4  847.82   27.50
   3   5   4  939.41   29.20
   3   5   4  887.21   25.20
   3   5   4  961.00   27.20
  -4  -5  -4   -5.90    5.40
  -4  -5  -4    7.30    7.20
  -4  -5  -4   -3.80    4.40
  -4  -5  -4   -1.00    5.30
   4   5   4   -1.60    3.50
   4   5   4    5.60    5.40
   4   5   4    4.30    5.40
  -5  -5  -4  858.01   28.80
  -5  -5  -4  808.82   30.80
  -5  -5  -4  826.92   28.10
  -5  -5  -4  845.72   20.90
   5   5   4  850.81   29.90
   5   5   4  769.52   28.60
   5   5   4  827.92   18.90
  -6  -5  -4  182.18   10.30
  -6  -5  -4  203.38   18.00
  -6  -5  -4  211.18   18.60
  -6  -5  -4  177.38   17.80
   6   5   4  176.48   17.50
   6   5   4  190.78   17.60
  -7  -5  -4   13.90    8.30
  -7  -5  -4   19.00    8.70
  -7  -5  -4   22.40    6.20
  -7  -5  -4   20.30    8.50
   7   5   4   14.80    8.30
   7   5   4   23.90    8.80
  -8  -5  -4  906.21   37.30
  -8  -5  -4  903.81   35.40
  -8  -5  -4  880.11   27.40
  -8  -5  -4  958.20   37.60
   8   5   4  893.81   37.20
   8   5   4  908.31   35.00
  -9  -5  -4   62.69   14.10
  -9  -5  -4   59.49   15.40
  -9  -5  -4   51.69   12.60
   9   5   4   59.29   13.80
   9   5   4   50.79   12.20
   9   5   4   53.69   13.80
 -10  -5  -4   29.80   13.40
 -10  -5  -4   35.50   13.30
  10   5   4   29.30   11.50
  10   5   4   36.60   13.60
  10   5   4   16.00   12.00
 -11  -5  -4   58.29   16.50
  11   5   4   30.40   13.80
  11   5   4   19.70   17.50
  11   5   4   61.49   17.30
   5  -6  -4  -15.90   11.30
  -5   6   4    3.10   11.60
  -5   6   4   -1.50   11.60
   4  -6  -4   96.19   19.10
   4  -6  -4  112.69   19.00
  -4   6   4  151.18   21.50
  -4   6   4  134.39   20.50
   3  -6  -4   42.00   14.10
   3  -6  -4   64.59   16.60
  -3   6   4   42.60   14.10
  -3   6   4   81.09   16.20
   2  -6  -4  309.67   22.00
   2  -6  -4  326.57   23.50
  -2   6   4  319.87   24.00
  -2   6   4  311.77   22.00
   1  -6  -4   49.20   10.10
   1  -6  -4   45.80   10.90
   1  -6  -4   63.19   13.40
  -1   6   4   45.80   12.00
  -1   6   4   36.60    9.90
   0  -6  -4   -1.30    7.20
   0  -6  -4    2.30    6.40
   0  -6  -4   13.80   10.50
   0   6   4    3.40    7.20
   0   6   4    2.90    5.10
   0   6   4   -8.30    6.00
  -1  -6  -4   11.90    7.00
  -1  -6  -4    4.30    6.60
  -1  -6  -4   -0.70    8.50
  -1  -6  -4   17.70    6.30
   1   6   4    8.70    5.50
   1   6   4    2.00    5.90
   1   6   4   10.80    6.50
   1   6   4    5.30    3.40
  -2  -6  -4   -2.20    5.60
  -2  -6  -4   -8.00    6.70
  -2  -6  -4    0.10    4.40
  -2  -6  -4   -1.30    5.90
   2   6   4   -1.00    5.40
   2   6   4    2.50    4.00
   2   6   4   -3.10    5.00
  -3  -6  -4   24.40    8.30
  -3  -6  -4   26.60    5.40
  -3  -6  -4   23.80    8.10
  -3  -6  -4   30.40    7.70
   3   6   4   25.30    6.90
   3   6   4   29.70    7.60
   3   6   4   21.20    6.50
  -4  -6  -4  146.39    9.40
  -4  -6  -4  131.99   14.50
  -4  -6  -4  163.28   14.60
  -4  -6  -4  158.08   16.70
   4   6   4  157.38   15.50
   4   6   4  160.28   10.80
   4   6   4  163.38   14.70
  -5  -6  -4   11.80    8.40
  -5  -6  -4    8.10    8.30
  -5  -6  -4   15.90    4.10
  -5  -6  -4   10.90    7.40
   5   6   4    4.40    6.60
   5   6   4    7.70    7.50
   5   6   4   11.30    4.50
  -6  -6  -4  310.17   19.70
  -6  -6  -4  332.27   20.10
  -6  -6  -4  365.86   12.70
  -6  -6  -4  362.96   22.80
   6   6   4  342.27   20.70
   6   6   4  384.86   22.60
  -7  -6  -4   28.20   10.00
  -7  -6  -4   37.90   10.50
  -7  -6  -4   35.00   11.00
   7   6   4   43.10   11.20
   7   6   4   34.80   10.30
  -8  -6  -4   34.90   11.40
  -8  -6  -4   48.20   12.50
  -8  -6  -4   49.60   12.80
   8   6   4   69.39   13.70
   8   6   4   36.70   12.20
  -9  -6  -4  855.21   38.00
  -9  -6  -4  858.21   39.70
  -9  -6  -4  909.81   38.20
   9   6   4  780.02   37.20
   9   6   4  883.71   37.10
 -10  -6  -4   -0.50   10.30
 -10  -6  -4   12.50   10.20
 -10  -6  -4   21.30   11.30
  10   6   4   19.10   11.80
  10   6   4   -9.50    9.70
  10   6   4   10.50   10.00
 -11  -6  -4   12.80   12.40
 -11  -6  -4    8.30   11.40
  11   6   4    3.00   10.50
  11   6   4   10.10   12.20
  11   6   4   12.70   12.70
   4  -7  -4    4.60   16.00
   4  -7  -4   54.59   17.60
  -4   7   4   39.70   14.30
  -4   7   4   42.60   15.30
   3  -7  -4  -12.20   12.10
   3  -7  -4  -13.50   12.00
  -3   7   4   20.70   11.60
  -3   7   4   20.10   12.40
   2  -7  -4  480.95   29.50
   2  -7  -4  522.65   28.20
  -2   7   4  523.65   29.90
  -2   7   4  534.15   31.30
   1  -7  -4   27.90    8.90
   1  -7  -4   18.70   12.40
   1  -7  -4   35.50   12.00
  -1   7   4   28.80   10.90
  -1   7   4   10.90   10.20
   0  -7  -4   49.00   11.20
   0  -7  -4   23.30   13.10
   0  -7  -4   51.79   11.30
   0   7   4   39.70   10.70
   0   7   4   42.90    8.30
   0   7   4   35.20   10.00
  -1  -7  -4  202.28   13.90
  -1  -7  -4  187.78   19.50
  -1  -7  -4  187.18   16.90
  -1  -7  -4  195.58   18.70
   1   7   4  207.18   14.50
   1   7   4  203.98   15.10
   1   7   4  158.98   16.70
  -2  -7  -4   12.00    9.50
  -2  -7  -4   10.60    7.90
  -2  -7  -4    9.50    5.60
  -2  -7  -4    6.40    7.70
   2   7   4   16.50    8.10
   2   7   4    6.70    6.60
   2   7   4    6.30    4.80
   2   7   4   10.80    6.40
  -3  -7  -4   24.10    5.80
  -3  -7  -4   19.60    9.00
  -3  -7  -4   19.50    9.60
  -3  -7  -4   18.50    8.40
   3   7   4   25.20    8.10
   3   7   4   13.60    6.10
   3   7   4   -0.10    6.10
  -4  -7  -4   60.99   12.20
  -4  -7  -4   66.99   11.30
  -4  -7  -4   40.80   10.50
  -4  -7  -4   53.49    6.70
   4   7   4   47.00    9.40
   4   7   4   58.39   11.50
   4   7   4   41.30    8.20
  -5  -7  -4    8.20    8.20
  -5  -7  -4   25.40    8.50
  -5  -7  -4   42.10   10.90
   5   7   4   18.50    8.70
   5   7   4   39.40    7.20
   5   7   4   37.00    9.70
  -6  -7  -4   93.89   13.60
  -6  -7  -4  128.49   18.10
  -6  -7  -4   96.79   14.30
   6   7   4  102.79   14.80
   6   7   4   96.79   14.70
  -7  -7  -4    9.50    9.70
  -7  -7  -4   10.20   10.10
  -7  -7  -4   11.60    9.10
   7   7   4   18.30    9.70
   7   7   4   11.30    8.60
  -8  -7  -4  102.09   16.90
  -8  -7  -4  161.68   19.60
  -8  -7  -4  145.09   19.40
   8   7   4  146.49   18.80
   8   7   4  111.29   16.50
  -9  -7  -4   33.70   12.80
  -9  -7  -4   53.49   13.80
  -9  -7  -4   48.70   14.30
   9   7   4   53.59   13.80
   9   7   4   44.90   13.10
 -10  -7  -4   14.90   12.70
 -10  -7  -4   31.90   12.50
 -10  -7  -4   10.50   10.60
  10   7   4   13.70   10.40
  10   7   4    9.50   11.30
   3  -8  -4   54.99   17.60
   3  -8  -4   88.79   18.90
  -3   8   4   53.39   15.50
  -3   8   4   46.00   14.30
   2  -8  -4  115.89   18.40
   2  -8  -4   62.09   19.00
  -2   8   4   85.69   16.80
  -2   8   4  102.59   17.80
   1  -8  -4  272.27   26.30
   1  -8  -4  264.37   20.90
  -1   8   4  272.97   21.70
  -1   8   4  246.08   24.10
   0  -8  -4   72.69   14.00
   0  -8  -4   50.99   14.40
   0  -8  -4   48.10   11.90
   0   8   4   63.29   13.00
   0   8   4   55.79   13.30
  -1  -8  -4  339.17   22.80
  -1  -8  -4  368.66   24.20
  -1  -8  -4  387.46   23.10
   1   8   4  366.66   19.20
   1   8   4  349.57   20.90
   1   8   4  345.27   22.80
  -2  -8  -4  958.70   28.90
  -2  -8  -4 1004.20   38.00
  -2  -8  -4  917.71   35.50
  -2  -8  -4  973.50   34.10
   2   8   4  920.31   35.20
   2   8   4  932.21   30.10
   2   8   4 1008.70   33.20
  -3  -8  -4  139.19   18.90
  -3  -8  -4  133.39   16.70
  -3  -8  -4  190.18   18.20
   3   8   4  157.18   16.50
   3   8   4  166.68   14.40
   3   8   4  149.88   16.20
  -4  -8  -4  253.37   24.40
  -4  -8  -4  249.78   21.60
  -4  -8  -4  225.28   17.20
   4   8   4  224.28   16.40
   4   8   4  230.38   18.50
   4   8   4  216.38   15.70
  -5  -8  -4   -2.50    7.70
  -5  -8  -4   -8.50    8.20
  -5  -8  -4   -3.80    8.50
   5   8   4    3.40    5.80
   5   8   4   -2.90    6.10
   5   8   4    8.80    8.20
  -6  -8  -4  374.06   26.70
  -6  -8  -4  437.16   25.00
  -6  -8  -4  425.76   25.40
   6   8   4  394.16   24.30
   6   8   4  435.46   26.10
  -7  -8  -4   55.19   12.90
  -7  -8  -4   49.60   12.50
  -7  -8  -4   53.59   13.70
   7   8   4   42.50   12.40
   7   8   4   46.30   12.60
  -8  -8  -4    5.90    9.20
  -8  -8  -4   12.20   11.00
  -8  -8  -4    9.40   10.70
   8   8   4   -1.20    9.50
   8   8   4   -1.50    8.60
  -9  -8  -4   78.59   17.50
  -9  -8  -4   91.79   16.40
  -9  -8  -4   88.39   16.40
   9   8   4   90.69   16.10
   9   8   4  112.59   19.00
 -10  -8  -4    7.80   11.50
 -10  -8  -4    2.30    9.30
 -10  -8  -4   17.80   12.20
  10   8   4    8.20    9.50
  10   8   4  -10.10    8.10
   1  -9  -4  128.79   20.60
   1  -9  -4  142.79   18.40
  -1   9   4  167.58   20.50
  -1   9   4  205.38   24.30
   0  -9  -4    5.40   12.20
   0  -9  -4   32.00   11.70
   0   9   4    4.40    9.60
   0   9   4   -4.90    8.10
  -1  -9  -4   43.50   12.90
  -1  -9  -4   75.59   15.20
  -1  -9  -4   81.29   16.20
   1   9   4   53.89   12.60
  -2  -9  -4   89.39   17.60
  -2  -9  -4   94.19   14.80
  -2  -9  -4   70.79   15.10
   2   9   4   75.39   15.00
   2   9   4   84.09   12.70
  -3  -9  -4  587.74   30.00
  -3  -9  -4  631.94   33.10
  -3  -9  -4  599.74   28.80
   3   9   4  574.84   27.80
   3   9   4  577.34   27.00
  -4  -9  -4  436.06   28.50
  -4  -9  -4  400.26   24.40
  -4  -9  -4  346.97   24.40
   4   9   4  361.06   21.10
   4   9   4  403.46   21.40
   4   9   4  380.66   23.50
  -5  -9  -4  121.29   18.20
  -5  -9  -4  133.79   19.90
  -5  -9  -4  177.38   19.40
   5   9   4  142.19   18.40
   5   9   4  139.49   14.50
   5   9   4  143.49   16.60
  -6  -9  -4   50.99   13.20
  -6  -9  -4   71.59   16.20
  -6  -9  -4   61.49   12.90
   6   9   4   58.89   12.90
   6   9   4   72.69   15.10
  -7  -9  -4   90.79   17.00
  -7  -9  -4   91.99   17.00
  -7  -9  -4   99.89   16.20
   7   9   4   53.69   13.60
   7   9   4   65.99   14.40
  -8  -9  -4   68.99   16.10
  -8  -9  -4   62.19   13.70
  -8  -9  -4   48.30   13.00
   8   9   4   58.79   14.10
   8   9   4   59.09   14.20
  -9  -9  -4   15.40   11.60
  -9  -9  -4   12.70   11.70
  -9  -9  -4    5.20   11.20
   9   9   4   -0.60    9.60
   9   9   4    4.20   10.30
 -10  -9  -4    2.40   10.60
 -10  -9  -4   13.30   11.40
 -10  -9  -4   -0.50   11.10
  10   9   4    3.30    9.50
  10   9   4   13.50   12.20
   0 -10  -4  179.68   23.30
   0 -10  -4  203.08   21.80
   0  10   4  259.57   27.50
  -1 -10  -4   47.90   13.60
  -1 -10  -4   44.50   16.20
  -1 -10  -4   38.20   14.50
   1  10   4   65.39   14.90
  -2 -10  -4   13.70   13.60
  -2 -10  -4   30.60   12.00
  -2 -10  -4   47.40   12.90
   2  10   4   17.20   11.20
  -3 -10  -4   -5.30   10.70
  -3 -10  -4   -7.60    7.60
  -3 -10  -4   17.10   12.10
   3  10   4    2.40    8.30
   3  10   4   -7.80    7.70
  -4 -10  -4   98.29   18.00
  -4 -10  -4   85.79   16.30
  -4 -10  -4   94.79   16.10
   4  10   4   77.69   13.80
   4  10   4  112.39   15.60
  -5 -10  -4  202.38   22.00
  -5 -10  -4  202.18   24.80
  -5 -10  -4  182.68   20.80
   5  10   4  191.18   19.20
   5  10   4  181.68   21.20
   5  10   4  204.58   18.70
  -6 -10  -4  126.39   18.10
  -6 -10  -4  101.49   17.10
  -6 -10  -4  118.39   20.70
   6  10   4   84.89   14.60
   6  10   4  100.39   16.60
  -7 -10  -4  107.09   20.40
  -7 -10  -4   97.29   17.10
  -7 -10  -4   94.89   17.70
   7  10   4   71.49   15.00
   7  10   4   80.29   16.30
  -8 -10  -4  113.89   18.60
  -8 -10  -4   67.99   16.00
  -8 -10  -4   87.59   19.10
   8  10   4   96.69   18.20
   8  10   4  103.79   18.90
  -9 -10  -4   51.99   16.60
  -9 -10  -4   51.69   14.40
  -9 -10  -4   55.29   15.30
   9  10   4   45.90   13.70
   9  10   4   40.20   15.40
  -2 -11  -4  199.28   22.90
  -2 -11  -4  193.08   25.20
  -2 -11  -4  166.68   23.20
   2  11   4  205.88   24.00
  -3 -11  -4   61.79   15.80
  -3 -11  -4   90.79   16.40
  -3 -11  -4   68.49   17.40
   3  11   4   58.59   15.10
  -4 -11  -4   12.30   12.30
  -4 -11  -4   12.70   10.90
  -4 -11  -4   -8.50   10.20
   4  11   4   30.80   11.20
   4  11   4    3.40    8.90
  -5 -11  -4  163.88   20.10
  -5 -11  -4  132.29   22.00
  -5 -11  -4  173.28   22.30
   5  11   4  145.09   19.80
   5  11   4  173.88   21.50
  -6 -11  -4   28.00   13.90
  -6 -11  -4   21.40   10.80
  -6 -11  -4    7.60   12.80
   6  11   4   33.90   13.20
   6  11   4   21.30   10.90
  -7 -11  -4   92.89   18.40
  -7 -11  -4   39.50   16.40
  -7 -11  -4   64.89   14.70
   7  11   4   64.19   14.50
   7  11   4   59.49   14.90
  -8 -11  -4   55.19   15.10
  -8 -11  -4   24.90   12.40
  -8 -11  -4   39.90   16.50
   8  11   4   20.80   12.90
   8  11   4   42.10   14.20
   6  11  -5  200.98   21.60
   6  11  -5  178.98   23.10
  -6 -11   5  230.38   26.90
  -6 -11   5  230.28   25.90
   5  11  -5   29.10   11.20
   5  11  -5   33.70   12.50
  -5 -11   5   47.50   15.30
  -5 -11   5   61.39   15.90
  -5 -11   5   49.70   16.50
   4  11  -5    7.00    9.10
   4  11  -5   11.80    9.80
  -4 -11   5    6.70   10.10
  -4 -11   5    3.90   10.50
  -4 -11   5   -5.20    8.60
   3  11  -5   18.50   10.60
   3  11  -5   26.10   11.70
  -3 -11   5   26.80   12.20
  -3 -11   5   25.60   11.80
  -3 -11   5   16.80   11.00
   2  11  -5    1.10    9.10
   2  11  -5    5.70    8.00
  -2 -11   5    5.80    9.20
  -2 -11   5   10.30   11.70
  -2 -11   5   13.60   12.00
   1  11  -5   -4.30    9.10
  -1 -11   5   15.40   11.30
  -1 -11   5   22.30   13.10
   7  10  -5   27.10   10.30
   7  10  -5   17.90   11.20
  -7 -10   5   35.20   14.60
  -7 -10   5   39.80   15.00
  -7 -10   5   73.09   18.30
   6  10  -5    5.00    9.70
   6  10  -5    5.10    8.60
  -6 -10   5   10.20   10.40
  -6 -10   5   15.50   11.00
  -6 -10   5    0.80    9.50
   5  10  -5   47.50   12.10
   5  10  -5   34.80   12.00
  -5 -10   5   25.80    9.80
  -5 -10   5   48.10   15.10
  -5 -10   5   50.49   12.70
   4  10  -5   32.50   11.70
   4  10  -5   55.39   11.80
  -4 -10   5   24.50   12.90
  -4 -10   5   16.00    9.70
  -4 -10   5   43.70   12.60
   3  10  -5  190.68   20.50
   3  10  -5  242.98   23.40
  -3 -10   5  235.38   24.10
  -3 -10   5  225.08   24.30
  -3 -10   5  268.07   25.10
   2  10  -5   22.50   10.30
   2  10  -5   13.90    9.00
  -2 -10   5   19.60   11.70
  -2 -10   5   15.20   10.90
  -2 -10   5   -3.70    9.10
  -2 -10   5   10.00    7.80
   1  10  -5   66.99   15.00
   1  10  -5   62.39   12.20
  -1 -10   5   73.19   14.40
  -1 -10   5   76.29   16.90
   0  10  -5   26.40   12.40
   0 -10   5   40.00   12.80
   0 -10   5   49.90   15.20
  -1  10  -5   -2.40   10.20
   1 -10   5    1.70    9.40
   1 -10   5   -1.10   12.20
   8   9  -5   97.39   18.00
  -8  -9   5  107.39   19.50
  -8  -9   5  149.88   24.00
  -8  -9   5   95.89   19.50
   7   9  -5   54.09   14.60
   7   9  -5   37.40   10.90
  -7  -9   5   56.39   13.90
  -7  -9   5   69.59   17.40
  -7  -9   5   16.00   13.70
   6   9  -5  219.58   24.00
   6   9  -5  221.88   20.30
  -6  -9   5  202.68   22.00
  -6  -9   5  219.68   24.50
  -6  -9   5  224.78   25.60
   5   9  -5   -2.80    8.30
   5   9  -5   -7.80    7.40
  -5  -9   5   -6.80    8.30
  -5  -9   5  -14.50    8.00
  -5  -9   5    5.70    8.90
  -5  -9   5   -6.60    9.90
   4   9  -5   -9.80    6.30
   4   9  -5    3.70    7.50
  -4  -9   5    8.70    9.50
  -4  -9   5  -14.70    8.20
  -4  -9   5   -5.80    7.80
  -4  -9   5    5.60    9.90
   3   9  -5   20.80    9.90
   3   9  -5   -2.80    7.00
  -3  -9   5    7.70    7.40
  -3  -9   5   21.70   10.40
  -3  -9   5   31.20   11.60
  -3  -9   5    8.70   10.60
   2   9  -5   92.49   14.50
   2   9  -5  105.09   15.30
  -2  -9   5   69.59   15.60
  -2  -9   5  115.29   16.70
  -2  -9   5   78.59   15.50
   1   9  -5   55.19   11.70
   1   9  -5   94.59   14.60
  -1  -9   5   57.19   13.90
  -1  -9   5   79.49   16.20
  -1  -9   5   71.99   13.40
  -1  -9   5   61.39   13.50
   0   9  -5  270.77   24.30
   0   9  -5  275.47   19.20
   0   9  -5  245.78   17.80
   0  -9   5  258.67   23.70
   0  -9   5  246.38   21.10
   0  -9   5  290.87   22.60
   0  -9   5  275.77   20.30
  -1   9  -5    3.10    9.80
  -1   9  -5    0.20    7.40
   1  -9   5  -10.30    8.60
   1  -9   5    5.30   12.30
  -2   9  -5   76.69   14.60
  -2   9  -5   81.89   14.50
   2  -9   5   45.90   16.10
   2  -9   5   92.39   15.80
   8   8  -5   92.89   17.20
  -8  -8   5   49.70   14.90
  -8  -8   5   54.99   15.10
  -8  -8   5   77.49   17.40
   7   8  -5  106.89   14.40
   7   8  -5  100.39   17.60
  -7  -8   5   67.39   17.10
  -7  -8   5   94.29   16.80
  -7  -8   5   68.49   16.00
   6   8  -5  170.68   20.30
   6   8  -5  170.68   17.00
  -6  -8   5  205.78   25.20
  -6  -8   5  142.49   19.90
  -6  -8   5  108.19   20.30
  -6  -8   5  158.98   19.30
  -6  -8   5  167.38   21.90
   5   8  -5  173.38   19.20
   5   8  -5  208.98   18.20
  -5  -8   5  191.58   19.90
  -5  -8   5  170.68   21.20
  -5  -8   5  166.28   21.90
  -5  -8   5  191.48   21.00
  -5  -8   5  192.98   16.50
   4   8  -5  459.55   26.10
   4   8  -5  477.95   24.40
  -4  -8   5  481.15   28.00
  -4  -8   5  499.45   27.90
  -4  -8   5  478.35   26.10
  -4  -8   5  476.15   20.70
   3   8  -5  131.09   15.90
   3   8  -5  127.29   15.90
  -3  -8   5  147.79   17.00
  -3  -8   5  108.99   15.30
  -3  -8   5  150.58   13.30
  -3  -8   5  145.79   18.40
  -3  -8   5  141.79   17.10
   2   8  -5   11.80    8.70
   2   8  -5   17.10    8.50
   2   8  -5   25.20    6.50
  -2  -8   5   20.40    9.40
  -2  -8   5   17.40    7.90
   1   8  -5   15.50    6.50
   1   8  -5   16.70    9.10
   1   8  -5    7.80    7.50
  -1  -8   5   11.30    8.50
  -1  -8   5   10.80   10.10
  -1  -8   5    4.40    9.20
  -1  -8   5   26.90   11.00
  -1  -8   5    9.80    8.20
   0   8  -5   36.70    9.00
   0   8  -5   41.10   10.90
   0   8  -5   44.50    9.80
   0  -8   5   55.39   11.20
   0  -8   5   62.29   14.60
   0  -8   5   35.90   12.20
   0  -8   5   29.60   10.40
   0  -8   5   49.60   10.40
  -1   8  -5  224.98   21.00
  -1   8  -5  251.57   17.70
   1  -8   5  212.18   23.80
   1  -8   5  247.68   23.30
   1  -8   5  258.57   19.70
   1  -8   5  224.48   20.60
   1  -8   5  230.28   18.70
  -2   8  -5  203.18   20.90
  -2   8  -5  221.18   20.90
   2  -8   5  157.98   18.20
   2  -8   5  205.88   20.90
   2  -8   5  198.58   23.30
  -3   8  -5  119.49   16.80
  -3   8  -5  134.99   19.00
   3  -8   5  183.08   20.10
   3  -8   5  121.59   19.90
   3  -8   5  104.69   17.30
  -4   8  -5   24.50   11.90
  -4   8  -5   17.10   10.70
   4  -8   5   10.50   13.60
   4  -8   5  -11.50   14.00
   9   7  -5    5.20   10.30
   9   7  -5   -1.90    9.80
  -9  -7   5    4.50   11.50
  -9  -7   5   -7.30    8.20
  -9  -7   5    1.40   11.20
  -9  -7   5    1.90   12.60
   8   7  -5  -10.90    7.80
   8   7  -5   11.40   10.60
  -8  -7   5    7.70   10.60
  -8  -7   5   13.70   11.30
  -8  -7   5   12.40    9.30
  -8  -7   5  -10.10    9.70
   7   7  -5   83.19   13.10
   7   7  -5   82.79   15.20
  -7  -7   5   90.59   16.70
  -7  -7   5   56.49   14.00
  -7  -7   5   87.09   13.50
  -7  -7   5   78.29   16.40
  -7  -7   5   76.39   16.10
   6   7  -5   36.40   11.20
   6   7  -5   45.70   10.20
  -6  -7   5   27.70   12.20
  -6  -7   5   46.10   12.50
  -6  -7   5   22.10   10.70
  -6  -7   5   43.20   13.10
  -6  -7   5   70.99   12.00
   5   7  -5   80.79   13.50
   5   7  -5  108.19   13.50
  -5  -7   5  112.69   15.90
  -5  -7   5   90.29   11.80
  -5  -7   5  109.59   14.90
  -5  -7   5  107.39   17.30
  -5  -7   5  109.29   16.00
   4   7  -5  175.08   15.80
   4   7  -5  184.68   18.00
   4   7  -5  203.08   15.00
  -4  -7   5  198.18   21.70
  -4  -7   5  208.38   14.00
  -4  -7   5  177.18   18.40
  -4  -7   5  183.68   19.80
  -4  -7   5  173.18   17.70
   3   7  -5  644.04   26.60
   3   7  -5  594.14   19.50
  -3  -7   5  623.94   28.60
  -3  -7   5  620.64   27.20
  -3  -7   5  641.44   21.70
  -3  -7   5  608.24   29.90
  -3  -7   5  615.04   28.10
   2   7  -5  261.07   17.60
   2   7  -5  285.77   14.20
  -2  -7   5  277.87   21.40
  -2  -7   5  283.97   19.60
  -2  -7   5  286.27   14.70
  -2  -7   5  271.07   19.30
  -2  -7   5  269.17   18.50
   1   7  -5  199.38   13.30
   1   7  -5  223.48   17.60
  -1  -7   5  191.18   18.70
  -1  -7   5  188.08   18.60
  -1  -7   5  187.98   17.30
  -1  -7   5  196.68   13.50
  -1  -7   5  200.78   18.10
   0   7  -5   24.90    9.00
   0   7  -5   24.80    7.60
   0  -7   5   21.80    8.50
   0  -7   5   19.60    8.40
   0  -7   5   39.70   12.10
   0  -7   5   25.00   10.30
   0  -7   5   16.70    9.20
  -1   7  -5  106.49   15.00
  -1   7  -5   94.99   12.80
   1  -7   5  108.09   13.90
   1  -7   5   81.19   14.00
   1  -7   5   88.99   16.30
   1  -7   5  104.19   12.60
   1  -7   5   74.49   11.90
  -2   7  -5    9.10    7.30
  -2   7  -5    2.40    7.40
   2  -7   5   12.80    9.90
   2  -7   5   -1.40   11.30
   2  -7   5  -10.70    8.80
  -3   7  -5  117.09   16.70
  -3   7  -5  131.69   16.30
   3  -7   5  128.39   17.30
   3  -7   5  107.49   15.70
   3  -7   5  106.19   19.90
  -4   7  -5   42.90   11.80
  -4   7  -5   74.59   15.30
   4  -7   5   60.79   14.80
   4  -7   5   86.89   15.40
   4  -7   5   43.40   16.00
  -5   7  -5    2.90    9.40
  -5   7  -5   29.70   12.40
   5  -7   5  -18.40   15.80
   5  -7   5   -0.50   12.50
   9   6  -5    8.40   10.40
   9   6  -5   16.50   11.10
   9   6  -5   15.10   11.40
   9   6  -5   30.80   12.50
  -9  -6   5    3.80   11.30
  -9  -6   5   14.00   11.20
  -9  -6   5   -1.90   11.50
  -9  -6   5   16.00   12.70
   8   6  -5   51.89   14.50
   8   6  -5   47.50   13.20
   8   6  -5   84.69   12.90
  -8  -6   5   61.99   14.30
  -8  -6   5   82.79   17.20
  -8  -6   5   70.59   14.00
  -8  -6   5   78.19   16.20
   7   6  -5  129.49   17.90
   7   6  -5  166.48   16.30
  -7  -6   5  171.58   21.40
  -7  -6   5  141.89   18.60
  -7  -6   5  145.99   19.10
  -7  -6   5  129.79   19.00
  -7  -6   5  145.99   16.70
   6   6  -5    5.40    6.90
   6   6  -5   -0.60    6.90
   6   6  -5   -3.00    6.80
  -6  -6   5   14.60    9.30
  -6  -6   5    0.90    8.10
  -6  -6   5   -5.50    6.10
  -6  -6   5    8.80    9.30
  -6  -6   5    0.20    8.90
   5   6  -5   -5.00    5.70
   5   6  -5    3.20    6.60
   5   6  -5  -11.30    5.60
  -5  -6   5  -12.30    8.10
  -5  -6   5   -3.20    5.60
  -5  -6   5    0.00    7.20
  -5  -6   5   -0.50    8.90
  -5  -6   5   -0.70    7.30
   4   6  -5   11.80    6.50
   4   6  -5    5.60    7.50
  -4  -6   5    3.00    7.00
  -4  -6   5    5.70    5.20
  -4  -6   5    6.00    7.00
  -4  -6   5   -3.20    7.40
  -4  -6   5    5.70    7.20
   3   6  -5  505.05   22.10
   3   6  -5  460.75   18.10
  -3  -6   5  469.45   21.50
  -3  -6   5  485.75   17.30
  -3  -6   5  514.45   24.70
  -3  -6   5  438.86   23.70
  -3  -6   5  440.56   24.60
   2   6  -5   38.70    7.20
   2   6  -5   30.20    7.80
  -2  -6   5   39.70   10.40
  -2  -6   5   46.00    6.70
  -2  -6   5   46.30    9.80
  -2  -6   5   26.70    8.00
  -2  -6   5   53.69   10.90
   1   6  -5   -3.20    6.10
   1   6  -5    2.10    4.90
  -1  -6   5   -4.90    4.30
  -1  -6   5   -3.70    6.30
  -1  -6   5  -11.30    5.70
  -1  -6   5    5.90    7.90
  -1  -6   5   -1.50    7.50
   0   6  -5   74.69   11.00
   0   6  -5   87.99   10.40
   0  -6   5   85.49    9.60
   0  -6   5   71.59   11.20
   0  -6   5   71.19   11.70
   0  -6   5   80.59   12.10
   0  -6   5   76.99   12.60
  -1   6  -5  174.48   16.60
  -1   6  -5  223.08   15.20
  -1   6  -5  198.68   15.70
   1  -6   5  193.38   14.60
   1  -6   5  193.78   18.40
   1  -6   5  187.38   14.30
   1  -6   5  201.78   14.60
   1  -6   5  225.38   19.30
  -2   6  -5    9.40    8.10
  -2   6  -5    0.90    6.90
  -2   6  -5   -0.20    6.10
   2  -6   5  -24.00   10.30
   2  -6   5    5.80    6.00
   2  -6   5    0.20    7.80
   2  -6   5   -0.20    5.80
   2  -6   5   12.20    9.50
  -3   6  -5  182.18   18.70
  -3   6  -5  203.88   18.60
   3  -6   5  241.48   21.00
   3  -6   5  208.28   17.70
   3  -6   5  167.28   21.10
  -4   6  -5   14.00    9.30
  -4   6  -5   13.00    8.70
   4  -6   5   19.60   14.60
   4  -6   5    6.80    9.60
   4  -6   5   -1.20    9.90
  -5   6  -5   10.80    9.30
  -5   6  -5   36.90   12.00
   5  -6   5    1.60   10.80
   5  -6   5    0.50   14.10
   5  -6   5   61.59   13.40
  -6   6  -5   44.60   13.40
  -6   6  -5   71.09   14.60
   6  -6   5   41.60   14.50
   6  -6   5   63.59   18.80
   9   5  -5  112.99   16.90
   9   5  -5   97.69   17.10
   9   5  -5   69.89   14.00
   9   5  -5  103.59   17.20
   9   5  -5   79.09   16.60
  -9  -5   5  100.99   17.10
  -9  -5   5  100.29   17.30
  -9  -5   5   90.29   18.00
   8   5  -5   93.49   15.90
   8   5  -5   86.99   15.20
   8   5  -5  100.69   16.70
   8   5  -5  107.39   17.50
   8   5  -5  116.79   14.10
  -8  -5   5  116.39   17.50
  -8  -5   5  112.89   18.00
  -8  -5   5   79.49   15.70
  -8  -5   5  117.29   16.90
   7   5  -5   -4.50    6.80
   7   5  -5    5.20    6.70
   7   5  -5   -7.10    7.50
  -7  -5   5   -2.00    8.60
  -7  -5   5    4.30    9.50
  -7  -5   5    0.20    8.10
  -7  -5   5    8.90    9.90
  -7  -5   5    0.60    8.70
   6   5  -5   75.29   14.00
   6   5  -5   88.49   12.40
   6   5  -5   80.69   11.00
  -6  -5   5   83.99   13.90
  -6  -5   5   66.19   14.00
  -6  -5   5  111.69   15.70
  -6  -5   5   85.19   13.40
  -6  -5   5   77.29   11.70
   5   5  -5   37.00    8.90
   5   5  -5   38.60    8.30
  -5  -5   5   55.29   11.50
  -5  -5   5   39.00    8.40
  -5  -5   5   29.10   10.90
  -5  -5   5   35.60   10.20
  -5  -5   5   38.90   10.10
   4   5  -5  -10.80    5.20
   4   5  -5   -6.70    5.30
  -4  -5   5    4.80    8.00
  -4  -5   5   -8.70    5.70
  -4  -5   5   -4.40    4.40
  -4  -5   5    3.10    7.80
  -4  -5   5    1.20    6.50
   3   5  -5    1.80    5.30
   3   5  -5   -2.70    5.30
  -3  -5   5    3.30    4.00
  -3  -5   5   -3.00    5.40
  -3  -5   5   10.30    7.20
  -3  -5   5    5.70    6.00
  -3  -5   5    5.90    7.20
   2   5  -5   28.40    7.30
   2   5  -5   24.60    6.90
  -2  -5   5   23.70    4.70
  -2  -5   5   41.10    8.30
  -2  -5   5   18.30    8.10
  -2  -5   5   26.60    8.20
   1   5  -5  227.78   14.20
   1   5  -5  211.58   12.60
  -1  -5   5  239.18   16.20
  -1  -5   5  221.98   14.80
  -1  -5   5  235.18   14.50
  -1  -5   5  242.28   10.10
  -1  -5   5  219.78   16.10
   0   5  -5  310.17   17.60
   0   5  -5  288.57   14.70
   0   5  -5  305.17   16.50
   0  -5   5  293.77   17.40
   0  -5   5  314.97   16.80
   0  -5   5  293.77   12.20
   0  -5   5  305.07   17.00
   0  -5   5  322.17   17.80
  -1   5  -5    0.40    5.50
  -1   5  -5    0.10    5.30
  -1   5  -5    0.30    5.70
   1  -5   5   -0.70    5.20
   1  -5   5   -0.40    5.30
   1  -5   5    0.40    7.80
   1  -5   5   16.20    7.80
   1  -5   5    8.30    5.50
  -2   5  -5   32.00    8.10
  -2   5  -5   37.00    9.50
  -2   5  -5   41.70    8.30
   2  -5   5   20.10    7.50
   2  -5   5   34.00    7.40
   2  -5   5   16.50    9.50
   2  -5   5   25.30    8.40
  -3   5  -5   15.10    8.30
  -3   5  -5    5.80    6.30
  -3   5  -5    2.10    6.90
   3  -5   5   15.80    7.90
   3  -5   5   11.00    5.90
   3  -5   5    0.90    8.20
   3  -5   5   -9.40   10.30
  -4   5  -5    0.50    7.70
  -4   5  -5   -0.80    6.70
   4  -5   5   26.70   10.20
   4  -5   5   11.10    8.50
   4  -5   5    1.50    9.50
  -5   5  -5   53.59   12.60
  -5   5  -5   42.40   11.00
   5  -5   5   39.80   11.80
   5  -5   5   17.30   12.40
   5  -5   5   45.80   12.10
  -6   5  -5   93.99   16.00
  -6   5  -5   95.89   14.90
   6  -5   5   83.09   15.50
   6  -5   5   84.29   15.40
   6  -5   5   55.29   15.50
  -7   5  -5   25.50   19.40
  -7   5  -5   36.70   12.90
   7  -5   5    3.60   13.20
   7  -5   5    0.20   11.10
   9   4  -5    7.20   10.20
   9   4  -5    5.10   10.00
   9   4  -5    1.10    8.10
   9   4  -5    3.70    9.70
  -9  -4   5   20.50   13.50
  -9  -4   5   10.00   11.10
   8   4  -5   65.89   11.70
   8   4  -5   62.49   14.20
   8   4  -5   83.59   14.50
   8   4  -5   53.39   13.20
   8   4  -5   59.09   13.00
   8   4  -5   68.49   13.20
   8   4  -5   72.59   12.80
  -8  -4   5   51.69   13.30
  -8  -4   5   52.99   12.70
  -8  -4   5   49.99   13.60
  -8  -4   5   63.49   14.90
  -8  -4   5   34.50   12.00
   7   4  -5  138.49   16.90
   7   4  -5  139.39   15.90
   7   4  -5  128.09   15.90
   7   4  -5  144.69   15.80
   7   4  -5  129.09   15.00
   7   4  -5  117.49   16.00
   7   4  -5  127.19   16.90
  -7  -4   5  110.99   16.10
  -7  -4   5  121.49   15.70
  -7  -4   5  128.99   16.90
  -7  -4   5  124.69   16.90
  -7  -4   5  103.79   15.50
  -7  -4   5  138.69   17.40
  -7  -4   5  142.39   16.70
   6   4  -5    9.90    8.00
   6   4  -5    6.80    7.50
   6   4  -5   -4.00    8.20
   6   4  -5   -1.90    6.30
  -6  -4   5    6.20    7.10
  -6  -4   5   -3.80    6.50
  -6  -4   5    2.80    8.30
  -6  -4   5    4.70    8.30
  -6  -4   5   -2.50    7.70
  -6  -4   5   -4.00    7.50
   5   4  -5  166.08   14.70
   5   4  -5  160.88   13.10
  -5  -4   5  173.78   16.20
  -5  -4   5  169.38   17.20
  -5  -4   5  161.48   14.10
  -5  -4   5  197.78   15.80
  -5  -4   5  182.58   18.20
   4   4  -5  166.78   12.00
   4   4  -5  166.78   13.30
  -4  -4   5  180.08   11.80
  -4  -4   5  196.68   17.20
  -4  -4   5  162.88   15.70
  -4  -4   5  200.88   15.80
  -4  -4   5  171.18   13.30
   3   4  -5    6.30    5.40
   3   4  -5   -7.00    4.60
  -3  -4   5    1.90    4.90
  -3  -4   5    0.10    5.40
  -3  -4   5    0.50    5.70
  -3  -4   5   -2.70    5.20
  -3  -4   5    3.70    3.80
   2   4  -5  135.59   10.60
   2   4  -5  134.49   12.60
  -2  -4   5  165.78   15.60
  -2  -4   5  144.79    7.60
  -2  -4   5  132.69   12.90
  -2  -4   5  142.79   10.50
  -2  -4   5  123.79   13.20
   1   4  -5  452.75   19.30
   1   4  -5  443.36   21.20
   1   4  -5  481.55   18.30
  -1  -4   5  478.65   20.30
  -1  -4   5  437.16   17.40
  -1  -4   5  472.35   20.50
  -1  -4   5  443.46   21.00
  -1  -4   5  452.45   11.70
   0   4  -5   42.20    7.70
   0   4  -5   64.59   10.20
   0   4  -5   52.89    8.10
   0  -4   5   58.19    8.90
   0  -4   5   50.09    9.40
   0  -4   5   41.70    7.90
   0  -4   5   36.00    8.20
   0  -4   5   52.69    5.30
  -1   4  -5  175.28   12.50
  -1   4  -5  200.68   12.40
  -1   4  -5  196.38   13.70
   1  -4   5  218.38   15.30
   1  -4   5  147.19   12.30
   1  -4   5  198.88   12.90
   1  -4   5  205.88   14.40
   1  -4   5  177.58    9.70
  -2   4  -5   -3.30    4.80
  -2   4  -5    3.30    5.70
  -2   4  -5   10.10    6.10
   2  -4   5   -6.90    4.00
   2  -4   5    1.50    6.00
   2  -4   5    5.90    7.90
   2  -4   5    4.30    5.00
  -3   4  -5   54.69    8.10
  -3   4  -5   52.29    9.60
  -3   4  -5   57.49   10.00
   3  -4   5   62.59    9.10
   3  -4   5   60.09    8.60
   3  -4   5   56.89   11.10
   3  -4   5   67.89   10.80
  -4   4  -5   60.59   12.00
  -4   4  -5   68.69   10.90
   4  -4   5   43.30    7.50
   4  -4   5   51.59    9.80
   4  -4   5   65.79   12.60
   4  -4   5   51.99   11.50
  -5   4  -5  560.14   27.40
  -5   4  -5  614.14   26.70
   5  -4   5  604.94   28.00
   5  -4   5  567.64   26.90
   5  -4   5  546.45   25.10
  -6   4  -5   56.69   13.20
  -6   4  -5   52.59   11.10
   6  -4   5   88.29   14.40
   6  -4   5   57.99   13.70
   6  -4   5   57.19   13.10
  -7   4  -5   27.90   11.90
  -7   4  -5  -10.30   10.80
   7  -4   5   -0.60    9.90
   7  -4   5    9.60   10.60
   7  -4   5   15.70   11.00
   9   3  -5  122.49   18.40
   9   3  -5  125.49   17.10
   9   3  -5   84.09   16.10
  -9  -3   5  124.79   20.30
   8   3  -5   15.90    9.30
   8   3  -5   -1.00    8.60
   8   3  -5    7.00    6.80
   8   3  -5  -12.00    7.20
   8   3  -5   -3.20    7.10
  -8  -3   5   -6.30    7.60
  -8  -3   5    7.60    9.20
  -8  -3   5   11.10   11.10
   7   3  -5  113.39   14.60
   7   3  -5  122.59   16.60
   7   3  -5  119.99   14.80
   7   3  -5   97.39   14.40
   7   3  -5  120.59   15.60
   7   3  -5  109.19   13.90
   7   3  -5  111.39   15.30
  -7  -3   5  108.09   15.10
  -7  -3   5   90.39   16.00
  -7  -3   5  114.69   15.40
  -7  -3   5  102.49   15.20
  -7  -3   5  119.39   15.40
  -7  -3   5   93.09   14.60
  -7  -3   5  127.09   16.60
   6   3  -5   14.90    7.50
   6   3  -5    9.30    8.60
   6   3  -5    5.20    7.40
   6   3  -5   22.20    8.20
   6   3  -5   26.20    8.90
   6   3  -5   20.60    8.70
  -6  -3   5   -9.50    7.50
  -6  -3   5   12.60    9.70
  -6  -3   5   -1.40    7.20
  -6  -3   5   14.60    8.60
  -6  -3   5   21.50    8.70
  -6  -3   5   21.60    9.00
  -6  -3   5    5.00    8.30
   5   3  -5  855.21   28.50
   5   3  -5  805.92   27.90
   5   3  -5  825.42   27.10
   5   3  -5  815.22   32.10
  -5  -3   5  845.32   28.20
  -5  -3   5  850.21   29.80
  -5  -3   5  837.52   30.50
  -5  -3   5  853.21   30.50
  -5  -3   5  826.42   29.90
  -5  -3   5  798.62   31.30
  -5  -3   5  791.82   28.90
   4   3  -5  480.45   19.60
   4   3  -5  477.35   19.90
   4   3  -5  488.95   23.60
  -4  -3   5  484.35   20.20
  -4  -3   5  466.95   21.50
  -4  -3   5  479.15   18.40
  -4  -3   5  477.55   22.70
  -4  -3   5  517.95   22.50
  -4  -3   5  466.85   21.20
   3   3  -5   13.20    5.80
   3   3  -5   17.70    7.20
   3   3  -5   18.30    6.20
  -3  -3   5   11.80    6.60
  -3  -3   5   12.80    5.70
  -3  -3   5   23.80    7.80
  -3  -3   5   20.20    4.90
  -3  -3   5    5.10    6.20
  -3  -3   5   10.20    6.30
   2   3  -5   23.90    6.60
   2   3  -5    7.30    6.80
   2   3  -5   16.90    6.30
  -2  -3   5   19.20    6.50
  -2  -3   5   15.90    7.20
  -2  -3   5   11.60    6.60
  -2  -3   5   12.40    5.30
  -2  -3   5   13.90    3.50
   1   3  -5  176.38    5.50
   1   3  -5  197.68   15.40
   1   3  -5  174.08   12.70
   1   3  -5  200.68   13.00
  -1  -3   5  174.48   13.70
  -1  -3   5  182.48    5.60
  -1  -3   5  186.58   14.50
  -1  -3   5  153.18   10.40
  -1  -3   5  180.48   12.90
   0   3  -5 1158.48   33.30
   0   3  -5 1146.89   30.20
   0   3  -5 1166.98   30.40
   0  -3   5 1105.69   26.80
   0  -3   5 1115.29   19.00
   0  -3   5 1158.78   19.30
   0  -3   5 1136.29   31.80
   0  -3   5 1103.29   30.60
  -1   3  -5   51.89    8.50
  -1   3  -5   53.09    8.60
  -1   3  -5   41.80    7.70
   1  -3   5   40.70    8.40
   1  -3   5   52.09    8.10
   1  -3   5   52.49    5.30
   1  -3   5   59.49    8.90
  -2   3  -5   23.80    6.20
  -2   3  -5   27.40    6.60
   2  -3   5   34.00    7.00
   2  -3   5   24.50    5.00
   2  -3   5   19.20    7.10
   2  -3   5   23.20    6.90
  -3   3  -5  128.99   10.20
  -3   3  -5  121.09   12.20
  -3   3  -5  125.39   11.70
   3  -3   5  136.19   11.40
   3  -3   5  102.89   11.10
   3  -3   5  153.58   14.70
   3  -3   5  148.99   10.10
  -4   3  -5   11.80    7.70
  -4   3  -5    8.10    5.00
  -4   3  -5    6.60    5.70
   4  -3   5   13.10    5.30
   4  -3   5    7.50    7.80
   4  -3   5   18.90    8.10
   4  -3   5    4.00    5.90
  -5   3  -5  408.16   22.20
  -5   3  -5  382.76   19.30
   5  -3   5  389.46   21.90
   5  -3   5  351.76   18.80
   5  -3   5  395.76   20.30
   5  -3   5  401.16   22.30
  -6   3  -5   64.39   13.20
  -6   3  -5   74.29   11.50
   6  -3   5   78.69   14.50
   6  -3   5   58.89   12.60
   6  -3   5  113.49   14.90
  -7   3  -5   52.19   13.50
   7  -3   5   45.10   13.00
   7  -3   5   48.40   12.40
   7  -3   5   25.50   11.70
  -8   3  -5   19.80   11.50
   8  -3   5   26.40   11.80
   8  -3   5   34.30   13.30
   8  -3   5   19.60   12.90
   8   2  -5  126.79   16.90
   8   2  -5  117.89   16.90
  -8  -2   5  103.19   18.00
  -8  -2   5  150.88   19.40
   7   2  -5  103.29   14.00
   7   2  -5   97.49   14.00
   7   2  -5  123.59   14.40
   7   2  -5  128.89   16.10
   7   2  -5  104.19   15.50
  -7  -2   5  138.79   18.90
  -7  -2   5   97.59   15.70
  -7  -2   5  102.19   13.60
   6   2  -5    6.20    7.10
   6   2  -5    8.40    8.20
   6   2  -5    9.60    7.50
   6   2  -5    4.80    6.50
  -6  -2   5    7.20    9.50
  -6  -2   5    9.40    8.90
  -6  -2   5    9.30    8.00
  -6  -2   5   21.80    8.20
   5   2  -5   -7.30    4.70
   5   2  -5   -1.10    5.90
   5   2  -5    0.80    7.40
   5   2  -5   -0.30    5.70
  -5  -2   5   -6.40    5.60
  -5  -2   5   -1.50    7.80
  -5  -2   5   -1.10    6.40
  -5  -2   5    7.60    6.50
  -5  -2   5   -0.50    7.50
  -5  -2   5   -4.20    6.00
   4   2  -5  296.17   15.30
   4   2  -5  339.47   19.50
   4   2  -5  279.97   14.20
   4   2  -5  294.37   16.70
  -4  -2   5  289.07   17.30
  -4  -2   5  310.17   18.50
  -4  -2   5  291.07   16.00
  -4  -2   5  293.97   16.70
  -4  -2   5  302.97   16.10
  -4  -2   5  274.87   15.00
  -4  -2   5  319.77   18.60
   3   2  -5    9.70    5.90
   3   2  -5   23.90    5.10
   3   2  -5   13.20    7.30
   3   2  -5   12.40    5.60
  -3  -2   5   22.20    7.20
  -3  -2   5    5.20    5.80
  -3  -2   5   11.70    5.20
  -3  -2   5   11.40    4.90
  -3  -2   5    7.70    6.10
  -3  -2   5   12.20    6.50
   2   2  -5 2560.64   44.50
   2   2  -5 2642.64   51.89
   2   2  -5 2556.34   52.29
   2   2  -5 2536.35   56.89
  -2  -2   5 2532.35   54.59
  -2  -2   5 2546.65   56.09
  -2  -2   5 2481.55   47.20
  -2  -2   5 2523.25   51.89
  -2  -2   5 2552.14   53.49
   1   2  -5  962.30   29.80
   1   2  -5  920.51   16.20
   1   2  -5  904.01   26.00
   1   2  -5  969.00   26.40
   1   2  -5  929.81   16.40
  -1  -2   5  942.11   27.30
  -1  -2   5  947.11   26.80
  -1  -2   5  925.91   21.10
   0   2  -5  185.78   13.70
   0   2  -5  190.88   14.00
   0   2  -5  205.88   12.10
   0  -2   5  189.08    9.90
   0  -2   5  192.68   13.80
   0  -2   5  203.08   13.00
  -1   2  -5  225.48   14.40
  -1   2  -5  216.18   13.00
  -1   2  -5  212.18   15.60
   1  -2   5  209.28    6.70
   1  -2   5  215.18    6.50
   1  -2   5  178.88   13.30
   1  -2   5  205.08   13.40
   1  -2   5  227.88   12.00
  -2   2  -5   89.89   10.00
  -2   2  -5   92.39   10.20
  -2   2  -5  114.69   10.30
   2  -2   5  118.19    9.80
   2  -2   5  119.29    7.50
   2  -2   5  108.59   11.20
   2  -2   5   94.39   10.00
  -3   2  -5  196.38   13.60
  -3   2  -5  184.98   11.60
  -3   2  -5  206.78   12.20
   3  -2   5  194.68   14.10
   3  -2   5  164.08   11.10
   3  -2   5  176.98   12.10
   3  -2   5  181.68   10.70
  -4   2  -5  634.74   20.90
  -4   2  -5  528.15   22.90
  -4   2  -5  618.14   19.60
   4  -2   5  646.14   23.10
   4  -2   5  611.54   25.00
   4  -2   5  631.14   20.40
   4  -2   5  641.14   21.80
  -5   2  -5    2.10    7.00
  -5   2  -5   -1.90    4.50
  -5   2  -5    8.80    5.90
   5  -2   5    5.50    7.10
   5  -2   5   -4.80    5.90
   5  -2   5   -2.00    6.90
   5  -2   5   -1.10    4.80
  -6   2  -5  148.49   13.50
  -6   2  -5  158.48   17.10
   6  -2   5  113.49   14.90
   6  -2   5  107.19   14.90
   6  -2   5  155.88   15.80
  -7   2  -5   14.50    9.80
   7  -2   5    8.50    9.50
   7  -2   5    6.90    9.10
   7  -2   5    4.10    8.80
  -8   2  -5   50.29   13.20
   8  -2   5   48.60   13.20
   8  -2   5   31.00   11.80
   8  -2   5   50.69   14.60
   8   1  -5  -20.50    7.30
   8   1  -5    7.40   10.10
  -8  -1   5   15.40   12.50
  -8  -1   5    3.10   10.10
   7   1  -5   62.79   12.20
   7   1  -5   94.29   15.20
  -7  -1   5   87.39   15.80
  -7  -1   5   55.29   15.40
   6   1  -5  702.93   28.60
   6   1  -5  730.53   28.70
   6   1  -5  699.83   28.00
   6   1  -5  751.22   27.30
  -6  -1   5  672.23   31.20
  -6  -1   5  669.53   32.40
  -6  -1   5  709.33   26.30
   5   1  -5  382.46   19.10
   5   1  -5  382.76   19.80
   5   1  -5  413.76   19.00
   5   1  -5  411.06   21.50
  -5  -1   5  360.96   18.10
  -5  -1   5  408.86   23.30
  -5  -1   5  382.86   18.60
  -5  -1   5  381.46   22.90
   4   1  -5   48.60    8.40
   4   1  -5   59.19    8.50
   4   1  -5   57.69    9.60
   4   1  -5   69.19   11.10
  -4  -1   5   53.79   10.80
  -4  -1   5   64.69    8.90
  -4  -1   5   71.09    9.60
  -4  -1   5   40.00    9.60
   3   1  -5  304.97   17.70
   3   1  -5  311.37   16.20
   3   1  -5  322.47   13.30
   3   1  -5  303.97   13.30
  -3  -1   5  304.97   13.60
  -3  -1   5  298.77   17.10
  -3  -1   5  292.77   15.10
  -3  -1   5  313.67   14.50
  -3  -1   5  310.77   17.20
   2   1  -5    0.90    6.10
   2   1  -5   21.20    6.90
   2   1  -5    8.80    3.70
   2   1  -5    3.70    3.60
  -2  -1   5   -6.50    4.20
  -2  -1   5    9.30    6.60
  -2  -1   5   -1.30    4.90
  -2  -1   5    5.20    4.00
   1   1  -5  836.92   27.00
   1   1  -5  797.22   16.50
   1   1  -5  810.92   16.90
   1   1  -5  813.02   23.90
  -1  -1   5  835.92   25.70
  -1  -1   5  804.42   23.00
  -1  -1   5  822.92   24.70
  -1  -1   5  818.62   17.50
   0   1  -5   61.79    9.70
   0   1  -5   56.79    2.70
   0   1  -5   69.19    8.70
   0   1  -5   46.70    3.00
   0   1  -5   57.99    4.20
   0   1  -5   52.89    8.30
   0  -1   5   45.30    7.40
   0  -1   5   39.10    7.60
   0  -1   5   63.09    4.50
   0  -1   5   66.29    9.40
  -1   1  -5 1883.01   40.80
  -1   1  -5 1982.30   39.60
  -1   1  -5 1979.20   43.80
  -1   1  -5 1897.61   31.00
  -1   1  -5 1865.21   33.70
   1  -1   5 1906.11   34.00
   1  -1   5 1858.61   30.60
   1  -1   5 1993.90   41.50
   1  -1   5 1907.51   41.40
  -2   1  -5   13.00    4.00
  -2   1  -5    8.90    8.20
  -2   1  -5   16.10    6.90
  -2   1  -5   20.80    5.70
   2  -1   5   16.60    4.90
   2  -1   5   24.10    7.30
   2  -1   5   26.50    8.10
  -3   1  -5    9.60    4.60
  -3   1  -5   10.50    4.80
  -3   1  -5    9.10    4.70
  -3   1  -5   -1.80    6.00
   3  -1   5   16.80    6.40
   3  -1   5   12.90    5.40
   3  -1   5    9.70    6.30
  -4   1  -5   10.40    4.70
  -4   1  -5   12.70    5.20
  -4   1  -5   17.00    5.80
  -4   1  -5   10.90    6.50
   4  -1   5   16.00    6.00
   4  -1   5    7.90    6.50
   4  -1   5    6.80    5.50
  -5   1  -5   14.50    5.20
  -5   1  -5   28.90    6.20
  -5   1  -5   19.10    7.20
  -5   1  -5   15.50    6.40
   5  -1   5    5.90    5.20
   5  -1   5   19.10    6.60
   5  -1   5   31.80    8.80
   5  -1   5   12.40    6.40
  -6   1  -5   25.40    6.40
  -6   1  -5   22.40    9.20
  -6   1  -5   27.80    9.30
   6  -1   5   37.10   10.40
   6  -1   5   24.90    9.20
   6  -1   5   34.70    7.50
   6  -1   5   22.70    9.20
  -7   1  -5   89.69   14.10
  -7   1  -5  112.39   15.80
   7  -1   5  115.89   15.30
   7  -1   5   97.99   15.60
   7  -1   5   78.09   13.50
  -8   1  -5   75.29   14.90
  -8   1  -5   64.69   13.40
   8  -1   5   64.89   14.20
   8  -1   5   51.29   13.90
   8  -1   5   43.50   12.80
  -9   1  -5   26.50   12.60
   9  -1   5   33.70   13.00
   9  -1   5   37.40   13.50
   9  -1   5   27.70   12.40
   8   0  -5   -6.50    8.80
   8   0  -5   -6.80    9.40
  -8   0   5    3.90   12.20
  -8   0   5   29.30   12.70
   7   0  -5   68.99   12.90
   7   0  -5   87.69   14.20
  -7   0   5   73.59   17.20
  -7   0   5   68.59   15.40
   6   0  -5  253.17   19.70
   6   0  -5  259.97   18.00
  -6   0   5  288.57   26.00
  -6   0   5  228.78   22.10
   5   0  -5  214.58   16.40
   5   0  -5  223.18   15.80
   5   0  -5  231.08   17.00
   5   0  -5  217.08   13.80
  -5   0   5  224.78   14.20
  -5   0   5  240.88   19.80
  -5   0   5  191.38   19.30
   4   0  -5    1.80    4.80
   4   0  -5    4.00    4.60
   4   0  -5    4.40    6.40
   4   0  -5    3.70    5.40
  -4   0   5   -1.90    7.20
  -4   0   5    5.20    7.80
  -4   0   5    0.70    4.60
  -4   0   5    3.60    5.60
   3   0  -5   65.69    7.40
   3   0  -5   65.19    8.50
   3   0  -5   57.29    9.50
   3   0  -5   50.79    9.10
  -3   0   5   62.49    7.60
  -3   0   5   63.09   10.40
  -3   0   5   51.69    9.50
  -3   0   5   66.89    8.60
   2   0  -5   83.69   10.00
   2   0  -5  103.99    8.80
   2   0  -5   84.29    6.70
   2   0  -5  102.59   12.10
  -2   0   5   78.79   10.50
  -2   0   5   81.49    7.90
  -2   0   5  103.19   10.40
  -2   0   5   81.89   10.80
   1   0  -5  986.20   18.80
   1   0  -5 1019.10   30.00
   1   0  -5  987.20   27.70
   1   0  -5 1018.40   22.50
   1   0  -5 1027.60   19.30
  -1   0   5 1051.09   30.60
  -1   0   5 1019.60   27.30
  -1   0   5 1032.20   24.40
   0   0  -5   88.39   11.60
   0   0  -5   91.49    9.60
   0   0  -5   83.79    6.20
   0   0   5   90.29    8.60
   0   0   5   74.09    8.70
   0   0   5   84.69   10.40
  -1   0  -5    7.60    6.80
  -1   0  -5    1.60    6.70
  -1   0  -5    6.00    3.30
  -1   0  -5    9.40    4.70
   1   0   5    7.40    6.30
   1   0   5    2.00    6.00
   1   0   5   10.60    2.50
   1   0   5    6.60    2.30
   1   0   5   -0.10    5.10
   1   0   5    6.20    5.80
  -2   0  -5  324.97   16.70
  -2   0  -5  322.37   12.70
  -2   0  -5  317.27   11.30
  -2   0  -5  331.37   16.00
   2   0   5  311.67   10.90
   2   0   5  360.16   16.20
   2   0   5  345.57   15.40
  -3   0  -5  354.46   16.60
  -3   0  -5  341.77   12.90
  -3   0  -5  338.27   16.10
  -3   0  -5  349.57   14.00
   3   0   5  366.86   17.60
   3   0   5  348.07   15.60
   3   0   5  355.86   13.90
  -4   0  -5  496.55   19.60
  -4   0  -5  509.65   15.60
  -4   0  -5  553.94   19.90
   4   0   5  523.35   21.50
   4   0   5  563.24   20.00
   4   0   5  539.75   19.50
  -5   0  -5    0.30    3.40
  -5   0  -5    1.30    4.60
  -5   0  -5    1.90    5.90
  -5   0  -5    9.30    5.80
   5   0   5   17.50    7.00
   5   0   5    4.30    5.00
   5   0   5    7.90    5.50
  -6   0  -5    2.60    7.10
  -6   0  -5    4.20    4.80
  -6   0  -5   -2.30    6.30
  -6   0  -5    2.60    4.20
   6   0   5    2.00    6.10
   6   0   5    3.50    5.80
   6   0   5   -7.50    6.40
  -7   0  -5  239.28   17.70
  -7   0  -5  229.38   20.30
   7   0   5  199.68   19.60
   7   0   5  185.88   18.20
   7   0   5  256.67   15.50
  -8   0  -5   14.10    9.50
  -8   0  -5   14.80    9.20
   8   0   5   24.40   11.30
   8   0   5    9.70    9.10
   8   0   5   12.30   10.20
  -9   0  -5  233.38   23.90
  -9   0  -5  237.58   24.00
   9   0   5  221.28   23.60
   9   0   5  222.88   23.00
   9   0   5  231.08   23.50
   7  -1  -5    6.00    8.40
   7  -1  -5   24.30   11.30
  -7   1   5   -9.00   10.50
  -7   1   5   16.30   12.30
   6  -1  -5  175.78   19.10
   6  -1  -5  211.88   16.80
  -6   1   5  200.28   22.50
  -6   1   5  154.08   20.10
   5  -1  -5  114.69   13.40
   5  -1  -5  117.39   14.50
   5  -1  -5  105.69   12.40
  -5   1   5  100.29   16.20
  -5   1   5  112.29   17.20
   4  -1  -5  200.88   11.00
   4  -1  -5  225.48   15.70
   4  -1  -5  203.98   15.90
   4  -1  -5  178.78   12.60
  -4   1   5  168.28   18.00
  -4   1   5  227.08   12.90
  -4   1   5  231.78   18.60
   3  -1  -5   21.00    4.50
   3  -1  -5   19.70    6.90
   3  -1  -5   18.10    5.10
   3  -1  -5   17.90    6.90
  -3   1   5   12.00    7.60
  -3   1   5    9.40    5.30
  -3   1   5   22.30    4.50
  -3   1   5    9.30    7.50
   2  -1  -5   -1.90    4.50
   2  -1  -5   12.20    6.60
   2  -1  -5    1.00    5.20
   2  -1  -5    5.60    3.50
  -2   1   5   16.20    4.00
  -2   1   5   14.40    5.60
  -2   1   5    1.80    6.10
  -2   1   5   14.20    7.80
   1  -1  -5   13.30    3.60
   1  -1  -5    9.20    6.60
   1  -1  -5    6.40    6.80
   1  -1  -5   13.80    3.40
   1  -1  -5   15.40    5.60
  -1   1   5    9.40    5.80
  -1   1   5   13.50    4.30
  -1   1   5   10.50    7.80
  -1   1   5   23.50    7.90
   0  -1  -5  314.27   12.60
   0  -1  -5  319.87   15.60
   0  -1  -5  306.17    6.50
   0  -1  -5  310.97   16.40
   0   1   5  308.87   14.70
   0   1   5  318.77   12.10
   0   1   5  308.17   16.60
  -1  -1  -5  188.68   11.90
  -1  -1  -5  161.38   12.80
  -1  -1  -5  171.38    9.70
   1   1   5  188.38   12.50
   1   1   5  182.18   10.40
   1   1   5  179.98   12.70
  -2  -1  -5 1202.78   25.90
  -2  -1  -5 1186.98   32.80
  -2  -1  -5 1188.88   26.70
  -2  -1  -5 1201.58   29.60
   2   1   5 1202.58   29.50
   2   1   5 1192.58   30.60
   2   1   5 1230.68   28.20
   2   1   5 1180.08   23.90
   2   1   5 1166.58   23.70
  -3  -1  -5  425.36   18.90
  -3  -1  -5  325.07   13.80
  -3  -1  -5  343.27   11.90
  -3  -1  -5  343.97   16.60
   3   1   5  346.77   16.60
   3   1   5  339.77   16.80
   3   1   5  334.27   13.20
  -4  -1  -5  452.35   18.00
  -4  -1  -5  446.86   12.80
  -4  -1  -5  469.15   18.30
  -4  -1  -5  434.76   18.80
   4   1   5  450.55   17.80
   4   1   5  428.06   19.30
   4   1   5  430.76   18.20
  -5  -1  -5 2305.27   50.99
  -5  -1  -5 2240.38   49.70
  -5  -1  -5 2285.67   40.20
   5   1   5 2330.27   51.39
   5   1   5 2260.67   53.59
   5   1   5 2259.77   49.80
  -6  -1  -5  582.14   24.70
  -6  -1  -5  565.14   15.10
  -6  -1  -5  575.74   21.80
  -6  -1  -5  573.74   23.40
   6   1   5  600.84   24.90
   6   1   5  600.54   22.60
   6   1   5  580.34   25.70
  -7  -1  -5   67.59    9.70
  -7  -1  -5   56.29   12.20
  -7  -1  -5   68.59   11.70
   7   1   5   53.89   11.50
   7   1   5   63.09   13.00
   7   1   5   77.59   11.10
  -8  -1  -5   35.60   10.30
  -8  -1  -5   23.90   10.20
   8   1   5   52.59   12.70
   8   1   5   57.19   10.60
   8   1   5   46.30   12.20
  -9  -1  -5   18.20   10.50
  -9  -1  -5   32.20   12.60
   9   1   5   44.00   13.50
   9   1   5   28.00   11.50
 -10  -1  -5   35.00   13.80
 -10  -1  -5   35.40   12.50
  10   1   5   19.50   11.80
  10   1   5   18.80   10.70
  10   1   5   56.39   15.30
   7  -2  -5    6.10    9.30
   7  -2  -5  -28.70    8.30
  -7   2   5   -6.90    9.80
  -7   2   5   -6.60   12.30
   6  -2  -5   29.60   12.00
   6  -2  -5   -4.70    7.90
  -6   2   5    0.30   10.80
  -6   2   5    5.10   12.10
   5  -2  -5  138.49   14.40
   5  -2  -5  120.59   16.50
  -5   2   5  131.99   18.00
  -5   2   5  157.58   20.60
   4  -2  -5  199.78   15.10
   4  -2  -5  191.78   18.20
   4  -2  -5  179.88   14.20
  -4   2   5  155.98   17.60
  -4   2   5  170.18   18.30
   3  -2  -5   87.29    9.70
   3  -2  -5   88.09   11.30
   3  -2  -5   87.19   11.60
  -3   2   5   72.89   12.00
  -3   2   5   86.59    8.90
  -3   2   5   87.19   13.10
   2  -2  -5   61.69    4.20
   2  -2  -5   63.29    4.10
   2  -2  -5   65.29    7.30
   2  -2  -5   69.99    9.90
   2  -2  -5   74.19   10.40
  -2   2   5   63.29    4.30
  -2   2   5   61.99    7.80
  -2   2   5   60.09   10.10
  -2   2   5   47.40    9.70
   1  -2  -5    6.60    5.70
   1  -2  -5   -4.00    5.30
   1  -2  -5    0.10    3.80
   1  -2  -5    0.90    6.00
   1  -2  -5    0.30    2.40
  -1   2   5    3.70    4.80
  -1   2   5    2.20    6.80
  -1   2   5   -1.30    6.30
  -1   2   5   -1.10    2.40
   0  -2  -5   76.59    9.30
   0  -2  -5   85.39   10.90
   0  -2  -5   86.69    6.50
   0  -2  -5   91.09    9.80
   0   2   5   79.39    5.70
   0   2   5   90.89    6.70
   0   2   5   94.49    9.50
   0   2   5   80.59   11.00
  -1  -2  -5  335.67   18.60
  -1  -2  -5  308.57    9.40
  -1  -2  -5  309.17   14.50
  -1  -2  -5  324.37   14.90
   1   2   5  328.97   16.00
   1   2   5  333.77    9.80
   1   2   5  345.37   12.60
   1   2   5  313.17   16.00
  -2  -2  -5  601.34   19.90
  -2  -2  -5  548.85   22.30
  -2  -2  -5  570.94   15.50
  -2  -2  -5  604.64   18.60
   2   2   5  568.84   18.70
   2   2   5  576.04   18.80
   2   2   5  577.24   15.30
   2   2   5  569.24   20.60
  -3  -2  -5  644.64   19.40
  -3  -2  -5  643.84   20.10
  -3  -2  -5  646.64   24.20
  -3  -2  -5  653.93   21.60
   3   2   5  653.73   22.50
   3   2   5  679.23   22.40
   3   2   5  640.44   18.10
  -4  -2  -5  469.65   12.30
  -4  -2  -5  442.96   18.00
  -4  -2  -5  468.95   18.30
  -4  -2  -5  489.95   20.70
  -4  -2  -5  458.55   17.90
   4   2   5  467.75   19.40
   4   2   5  461.35   19.70
   4   2   5  459.35   17.90
  -5  -2  -5   60.69    4.20
  -5  -2  -5   58.89    4.90
  -5  -2  -5   70.39    8.90
  -5  -2  -5   64.49   10.00
  -5  -2  -5   78.79   10.50
  -5  -2  -5   61.19    9.70
   5   2   5   58.99    9.40
   5   2   5   61.99    9.20
   5   2   5   54.79    9.70
  -6  -2  -5  858.81   27.30
  -6  -2  -5  837.82   28.20
  -6  -2  -5  831.62   29.60
   6   2   5  844.62   30.00
   6   2   5  881.51   29.20
   6   2   5  812.82   30.80
  -7  -2  -5  506.75   25.50
  -7  -2  -5  513.05   23.00
  -7  -2  -5  498.95   21.80
   7   2   5  499.75   24.80
   7   2   5  511.45   23.10
   7   2   5  514.25   26.00
  -8  -2  -5  745.93   29.60
  -8  -2  -5  721.63   32.30
   8   2   5  727.73   28.30
   8   2   5  688.53   31.40
   8   2   5  723.63   33.30
  -9  -2  -5  118.29   17.20
  -9  -2  -5  120.19   16.30
   9   2   5  115.79   17.70
   9   2   5  101.09   19.70
   9   2   5   93.39   15.90
 -10  -2  -5   49.20   14.50
 -10  -2  -5   31.00   11.30
  10   2   5   23.20   13.60
  10   2   5   58.89   14.60
   6  -3  -5    0.60   11.50
   6  -3  -5   -4.40    8.70
  -6   3   5  -10.60   10.40
  -6   3   5   -7.40   10.40
   5  -3  -5   14.60    9.20
   5  -3  -5   41.00   12.10
  -5   3   5   26.60   11.70
  -5   3   5   24.10   11.50
   4  -3  -5  224.58   19.90
   4  -3  -5  197.68   15.90
  -4   3   5  219.68   21.30
  -4   3   5  228.58   22.90
   3  -3  -5  817.02   30.20
   3  -3  -5  829.12   28.50
   3  -3  -5  841.62   26.30
  -3   3   5  821.32   22.80
  -3   3   5  801.82   32.80
  -3   3   5  828.72   34.00
   2  -3  -5   13.60    6.90
   2  -3  -5   15.60    7.20
   2  -3  -5   17.60    6.40
  -2   3   5   27.00    9.20
  -2   3   5   22.90    5.70
  -2   3   5   11.80    8.00
   1  -3  -5  126.29   10.10
   1  -3  -5  138.89   13.70
   1  -3  -5  126.59   12.90
   1  -3  -5  120.39   12.20
  -1   3   5  124.19   10.10
  -1   3   5  129.59   14.10
  -1   3   5  122.29   13.10
   0  -3  -5  216.18   14.60
   0  -3  -5  227.48    7.80
   0  -3  -5  218.58   10.50
   0  -3  -5  184.68   13.90
   0  -3  -5  222.78   13.60
   0   3   5  227.98   15.50
   0   3   5  207.98   15.10
   0   3   5  226.88    7.50
   0   3   5  213.68   12.60
  -1  -3  -5  186.48    9.50
  -1  -3  -5  201.18   12.90
  -1  -3  -5  179.68   12.50
   1   3   5  201.98   13.00
   1   3   5  184.88    9.00
   1   3   5  208.78   14.10
  -2  -3  -5  691.73   26.00
  -2  -3  -5  714.83   22.40
  -2  -3  -5  677.83   21.10
  -2  -3  -5  703.73   18.50
   2   3   5  740.33   20.80
   2   3   5  674.83   23.00
   2   3   5  711.03   22.30
  -3  -3  -5  879.91   25.30
  -3  -3  -5  864.21   23.90
  -3  -3  -5  821.72   28.60
  -3  -3  -5  858.21   23.00
   3   3   5  835.72   26.80
   3   3   5  892.91   25.80
   3   3   5  840.22   22.80
  -4  -3  -5   39.20    9.60
  -4  -3  -5   46.50    7.80
  -4  -3  -5   56.59    8.40
  -4  -3  -5   49.60    8.10
   4   3   5   48.30    5.50
   4   3   5   32.40    7.80
   4   3   5   59.09    9.20
  -5  -3  -5    7.50    6.00
  -5  -3  -5    5.20    6.40
  -5  -3  -5    6.00    2.10
  -5  -3  -5    6.80    5.90
  -5  -3  -5    6.80    4.80
  -5  -3  -5    7.30    2.00
   5   3   5    0.50    5.40
   5   3   5    6.50    6.50
  -6  -3  -5   48.20    9.80
  -6  -3  -5   50.79   10.30
  -6  -3  -5   45.60   10.10
  -6  -3  -5   41.80    7.80
   6   3   5   59.89   10.00
   6   3   5   30.00    8.10
   6   3   5   57.49   11.50
  -7  -3  -5  124.49   14.90
  -7  -3  -5  137.29   14.90
  -7  -3  -5  131.39   16.10
  -7  -3  -5  121.09   12.60
   7   3   5  128.49   15.90
   7   3   5  125.39   15.40
   7   3   5  160.98   16.30
  -8  -3  -5    3.00    8.70
  -8  -3  -5   -3.30    2.90
  -8  -3  -5    1.20    6.40
   8   3   5    2.20    9.00
   8   3   5   -2.40    6.90
   8   3   5   -3.60    8.50
  -9  -3  -5   45.70   12.30
  -9  -3  -5   32.00   10.00
   9   3   5   30.70   11.30
   9   3   5   35.90   13.00
   9   3   5   41.90   11.40
 -10  -3  -5   66.69   13.30
 -10  -3  -5   73.49   15.90
  10   3   5   54.79   15.80
  10   3   5   50.09   14.60
   6  -4  -5  120.79   17.40
   6  -4  -5  164.48   22.90
  -6   4   5  116.29   20.70
  -6   4   5  131.49   20.90
   5  -4  -5   97.79   15.40
   5  -4  -5  125.79   18.70
  -5   4   5  131.79   20.70
  -5   4   5  151.08   21.60
   4  -4  -5   18.40    9.20
   4  -4  -5   20.20   11.10
  -4   4   5   22.20   11.90
  -4   4   5    8.00   11.10
   3  -4  -5   -9.80    7.90
   3  -4  -5  -14.80    5.20
   3  -4  -5   -1.10   10.20
  -3   4   5   -4.50    7.10
  -3   4   5   -3.60    8.70
   2  -4  -5   38.10    8.90
   2  -4  -5   27.00   11.50
   2  -4  -5   36.70    9.80
  -2   4   5   38.70    6.90
  -2   4   5   30.60   11.20
  -2   4   5   20.30    9.10
   1  -4  -5   29.90    8.40
   1  -4  -5   44.40    9.80
   1  -4  -5   37.10    8.30
  -1   4   5   50.59   10.20
  -1   4   5   41.30    9.80
  -1   4   5   41.40    7.10
   0  -4  -5  478.85   20.50
   0  -4  -5  469.75   19.70
   0  -4  -5  468.65   21.60
   0  -4  -5  471.65   16.70
   0   4   5  477.85   22.10
   0   4   5  463.85   21.40
  -1  -4  -5 1696.63   38.80
  -1  -4  -5 1588.04   38.80
  -1  -4  -5 1622.54   43.40
  -1  -4  -5 1683.13   34.90
   1   4   5 1669.13   41.80
   1   4   5 1683.53   39.50
   1   4   5 1602.04   31.30
  -2  -4  -5   15.20    5.10
  -2  -4  -5   15.70    7.20
  -2  -4  -5   17.10    6.10
  -2  -4  -5    8.30    6.70
   2   4   5   16.10    6.30
   2   4   5   18.90    6.60
   2   4   5   13.30    4.60
  -3  -4  -5  950.10   25.60
  -3  -4  -5  977.60   32.90
  -3  -4  -5  930.51   27.70
  -3  -4  -5 1026.30   25.50
   3   4   5  971.10   26.10
   3   4   5  965.70   29.70
   3   4   5  964.40   27.10
  -4  -4  -5   24.60    8.00
  -4  -4  -5   16.80    6.80
  -4  -4  -5   37.30    7.10
  -4  -4  -5   28.00    6.60
   4   4   5   20.90    4.80
   4   4   5   26.20    7.60
   4   4   5   22.80    7.10
  -5  -4  -5   43.30    8.80
  -5  -4  -5   44.90    8.40
  -5  -4  -5   49.60   10.40
  -5  -4  -5   55.49    7.50
   5   4   5   30.50    7.90
   5   4   5   53.09    9.30
   5   4   5   41.90    4.20
  -6  -4  -5  255.17   17.40
  -6  -4  -5  224.18   12.90
  -6  -4  -5  243.58   17.20
  -6  -4  -5  217.68   16.70
   6   4   5  230.88   16.30
   6   4   5  198.18   18.50
  -7  -4  -5   12.80    8.10
  -7  -4  -5   -9.50    7.30
  -7  -4  -5    3.30    8.00
  -7  -4  -5    4.70    5.60
   7   4   5   -6.30    6.50
   7   4   5    5.00    8.10
  -8  -4  -5  141.09   18.60
  -8  -4  -5  150.58   18.40
  -8  -4  -5  144.19   17.10
  -8  -4  -5  133.49   13.50
   8   4   5  163.38   18.00
   8   4   5  139.39   17.70
   8   4   5  119.39   16.60
  -9  -4  -5    8.60    9.40
  -9  -4  -5    6.00    7.60
  -9  -4  -5    5.40    7.40
  -9  -4  -5    3.60    9.30
   9   4   5   20.80   11.70
   9   4   5   -0.80    8.50
   9   4   5    0.80    8.30
 -10  -4  -5   25.30   12.50
 -10  -4  -5   48.10   11.50
  10   4   5   50.59   12.20
  10   4   5   31.40   13.40
  10   4   5   46.40   13.40
   5  -5  -5  -12.30   12.60
   5  -5  -5  -11.80   11.60
  -5   5   5    9.40   12.50
  -5   5   5    4.70   11.00
   4  -5  -5  114.59   17.20
   4  -5  -5  116.29   19.40
  -4   5   5  122.59   20.00
  -4   5   5  122.49   19.80
   3  -5  -5  269.87   21.50
   3  -5  -5  271.77   24.00
  -3   5   5  243.28   24.40
  -3   5   5  242.98   24.60
   2  -5  -5  419.66   21.10
   2  -5  -5  359.36   21.00
   2  -5  -5  367.56   25.00
  -2   5   5  428.06   26.30
  -2   5   5  394.16   24.70
   1  -5  -5    3.90    7.90
   1  -5  -5    4.70   10.30
   1  -5  -5    7.10    7.60
  -1   5   5    0.70    6.70
  -1   5   5    6.90    8.30
  -1   5   5    5.80    5.70
   0  -5  -5   96.69   13.20
   0  -5  -5   96.79   12.00
   0  -5  -5   84.19   12.30
   0  -5  -5   77.09   10.10
   0   5   5   97.49   10.60
   0   5   5   90.39   13.20
   0   5   5   89.89   13.00
  -1  -5  -5   -7.80    5.80
  -1  -5  -5    3.90    5.50
  -1  -5  -5    1.00    7.00
  -1  -5  -5    0.70    4.90
   1   5   5   16.60    6.40
   1   5   5    5.30    3.00
   1   5   5   -3.70    5.30
   1   5   5   -1.00    4.90
  -2  -5  -5  507.25   22.00
  -2  -5  -5  505.75   24.00
  -2  -5  -5  501.85   18.30
  -2  -5  -5  513.15   18.80
   2   5   5  499.95   21.00
   2   5   5  511.95   20.90
   2   5   5  521.45   17.00
  -3  -5  -5  145.99   10.10
  -3  -5  -5  148.79   16.10
  -3  -5  -5  130.59   10.60
  -3  -5  -5  137.19   13.30
   3   5   5  136.49   10.80
   3   5   5  133.89   13.10
   3   5   5  131.69   11.60
  -4  -5  -5   23.30    6.20
  -4  -5  -5   15.20    6.30
  -4  -5  -5   15.10    7.30
  -4  -5  -5   27.10    9.30
   4   5   5   33.60    7.40
   4   5   5   23.00    5.40
   4   5   5   27.00    8.00
  -5  -5  -5   45.90   11.10
  -5  -5  -5   50.19    7.20
  -5  -5  -5   39.80    9.10
  -5  -5  -5   33.70    8.00
   5   5   5   40.80    8.60
   5   5   5   47.60    9.70
   5   5   5   49.70    5.90
  -6  -5  -5  221.58   17.10
  -6  -5  -5  159.68   15.70
  -6  -5  -5  192.78   11.40
  -6  -5  -5  198.98   19.60
   6   5   5  162.18   16.20
   6   5   5  177.78   17.10
  -7  -5  -5   59.29   11.90
  -7  -5  -5   76.69   12.90
  -7  -5  -5   72.69   13.00
  -7  -5  -5   74.89    9.30
   7   5   5   82.79   14.50
   7   5   5   79.39   14.20
  -8  -5  -5   27.60   11.10
  -8  -5  -5   19.70    6.60
  -8  -5  -5   14.80    8.80
  -8  -5  -5   10.90    9.80
   8   5   5   12.80    9.30
   8   5   5    0.00    8.50
  -9  -5  -5  469.35   28.30
  -9  -5  -5  438.06   28.80
  -9  -5  -5  459.15   27.10
   9   5   5  469.75   28.70
   9   5   5  426.56   26.10
   9   5   5  454.25   28.80
 -10  -5  -5   68.99   16.10
 -10  -5  -5   51.59   15.20
  10   5   5   79.79   17.50
  10   5   5   60.99   13.60
  10   5   5   69.49   16.40
  11   5   5   41.40   13.30
   4  -6  -5   21.30   15.00
   4  -6  -5   32.50   15.40
  -4   6   5   53.39   16.20
  -4   6   5   59.39   16.40
   3  -6  -5  113.89   17.20
   3  -6  -5  135.99   20.50
  -3   6   5  142.09   19.50
  -3   6   5  190.98   23.40
   2  -6  -5   -0.20   10.30
   2  -6  -5    2.10   10.70
  -2   6   5    1.80    8.80
  -2   6   5   15.10    9.30
   1  -6  -5  209.98   16.90
   1  -6  -5  234.38   18.00
   1  -6  -5  212.18   21.40
  -1   6   5  210.98   20.50
  -1   6   5  225.88   21.30
   0  -6  -5   23.70    9.00
   0  -6  -5   24.80   11.20
   0  -6  -5   20.10    8.00
   0  -6  -5   28.40    8.80
   0   6   5   19.60    7.00
   0   6   5   32.10   10.00
   0   6   5   36.60   10.30
  -1  -6  -5   40.80    9.20
  -1  -6  -5   35.40    9.90
  -1  -6  -5   35.30    8.20
  -1  -6  -5   41.70   12.10
   1   6   5   43.20    9.50
   1   6   5   39.00   10.10
   1   6   5   45.20    8.70
  -2  -6  -5   30.70   10.40
  -2  -6  -5   28.70    7.90
  -2  -6  -5   30.60    7.30
  -2  -6  -5   20.10    8.40
   2   6   5   28.50    8.10
   2   6   5   36.00    6.30
   2   6   5   33.10    8.60
  -3  -6  -5  162.38   12.80
  -3  -6  -5  159.08   11.20
  -3  -6  -5  218.98   20.60
  -3  -6  -5  160.88   15.50
   3   6   5  152.78   13.50
   3   6   5  170.78   16.20
   3   6   5  179.08   12.10
  -4  -6  -5  164.78   18.10
  -4  -6  -5  169.78   15.70
  -4  -6  -5  175.58   11.40
  -4  -6  -5  158.88   14.10
   4   6   5  202.68   15.80
   4   6   5  170.08   13.40
   4   6   5  176.18   12.10
  -5  -6  -5   43.00   10.10
  -5  -6  -5   35.80   11.20
  -5  -6  -5   27.80    8.60
  -5  -6  -5   60.89    8.20
   5   6   5   65.29   11.30
   5   6   5   54.79    7.60
   5   6   5   50.39   11.40
  -6  -6  -5  520.75   25.20
  -6  -6  -5  562.84   28.10
  -6  -6  -5  555.04   17.60
  -6  -6  -5  479.55   25.00
   6   6   5  500.75   25.00
   6   6   5  504.65   25.50
  -7  -6  -5   93.89   14.60
  -7  -6  -5  106.09   15.00
  -7  -6  -5  116.29   17.70
   7   6   5  124.09   16.90
   7   6   5  111.99   15.60
  -8  -6  -5  116.69   17.70
  -8  -6  -5  109.99   16.30
  -8  -6  -5  105.79   16.50
   8   6   5   95.29   15.10
   8   6   5   98.89   15.20
  -9  -6  -5    4.40    9.40
  -9  -6  -5   20.20   10.20
  -9  -6  -5   -2.00    9.50
   9   6   5   10.40    9.20
   9   6   5   16.10   11.00
 -10  -6  -5   40.00   14.30
 -10  -6  -5   11.90   10.50
 -10  -6  -5   20.70   11.70
  10   6   5   29.60   12.90
  10   6   5   18.50   12.80
  10   6   5   21.50   11.30
   3  -7  -5   52.19   17.40
   3  -7  -5   21.50   14.40
  -3   7   5   35.20   13.60
  -3   7   5   66.39   17.20
   2  -7  -5   23.10   13.70
   2  -7  -5   20.80   11.60
  -2   7   5    8.90    9.90
  -2   7   5   16.40   11.00
   1  -7  -5  135.79   16.80
   1  -7  -5  123.99   15.40
   1  -7  -5  118.49   18.30
  -1   7   5  125.19   17.70
  -1   7   5  127.19   18.60
   0  -7  -5  447.66   22.90
   0  -7  -5  435.76   26.50
   0  -7  -5  477.05   25.60
   0  -7  -5  496.55   23.80
   0   7   5  479.45   27.00
   0   7   5  499.05   25.60
  -1  -7  -5  289.77   19.20
  -1  -7  -5  305.77   18.40
  -1  -7  -5  282.87   20.20
  -1  -7  -5  337.17   22.70
   1   7   5  335.57   19.90
   1   7   5  307.87   17.80
   1   7   5  326.97   22.00
  -2  -7  -5 1164.98   41.10
  -2  -7  -5 1077.69   34.10
  -2  -7  -5 1105.49   37.20
  -2  -7  -5 1051.99   30.90
   2   7   5 1093.99   34.50
   2   7   5 1147.29   37.50
  -3  -7  -5  120.59   17.00
  -3  -7  -5  114.79   11.00
  -3  -7  -5   93.09   14.10
  -3  -7  -5  103.89   12.90
   3   7   5  118.19   11.70
   3   7   5  111.19   13.70
   3   7   5   85.29   11.80
  -4  -7  -5   -7.70    4.80
  -4  -7  -5   -6.10    8.00
  -4  -7  -5    1.90    6.90
  -4  -7  -5  -10.20    6.50
   4   7   5   10.80    6.20
   4   7   5   12.10    8.60
   4   7   5    1.60    5.60
  -5  -7  -5  495.15   27.40
  -5  -7  -5  490.35   24.20
  -5  -7  -5  547.95   26.10
   5   7   5  545.75   24.60
   5   7   5  509.95   20.00
   5   7   5  488.35   25.90
  -6  -7  -5   13.90   10.50
  -6  -7  -5    6.30    8.20
  -6  -7  -5   -2.80    8.00
   6   7   5   10.80    8.20
   6   7   5    8.50    9.50
  -7  -7  -5  164.08   18.20
  -7  -7  -5  207.38   20.20
  -7  -7  -5  186.48   22.00
   7   7   5  167.78   18.60
   7   7   5  197.98   20.40
  -8  -7  -5  209.88   22.20
  -8  -7  -5  200.48   22.20
  -8  -7  -5  229.18   22.80
   8   7   5  218.48   22.80
   8   7   5  208.28   23.10
  -9  -7  -5   90.49   16.10
  -9  -7  -5   73.29   14.70
  -9  -7  -5  103.39   17.70
   9   7   5  117.19   19.40
   9   7   5   94.09   16.40
 -10  -7  -5   24.60   12.30
 -10  -7  -5   30.90   14.20
 -10  -7  -5   16.60   11.40
  10   7   5   41.00   14.60
  10   7   5   17.00   10.90
   2  -8  -5   83.59   16.30
   2  -8  -5   56.99   17.90
  -2   8   5   63.39   16.10
  -2   8   5   53.49   15.40
   1  -8  -5   92.49   14.80
   1  -8  -5   49.99   15.30
  -1   8   5   47.90   13.40
  -1   8   5   63.69   14.90
   0  -8  -5  169.38   17.00
   0  -8  -5  161.18   17.80
   0  -8  -5  136.19   19.30
   0  -8  -5  175.58   19.60
   0   8   5  136.79   17.30
   0   8   5  124.69   18.00
  -1  -8  -5  244.28   17.10
  -1  -8  -5  264.17   19.60
  -1  -8  -5  258.37   21.40
  -1  -8  -5  264.27   24.10
   1   8   5  255.17   17.00
   1   8   5  252.67   19.10
   1   8   5  209.78   20.90
  -2  -8  -5  117.39   12.30
  -2  -8  -5   91.49   15.90
  -2  -8  -5  103.89   14.30
  -2  -8  -5  138.89   19.00
   2   8   5  107.69   15.40
   2   8   5  125.29   15.10
  -3  -8  -5  319.37   24.10
  -3  -8  -5  350.96   21.20
  -3  -8  -5  411.66   26.40
   3   8   5  330.47   20.90
   3   8   5  339.37   20.90
  -4  -8  -5  313.27   22.40
  -4  -8  -5  307.57   23.80
  -4  -8  -5  300.37   20.00
   4   8   5  281.27   20.70
   4   8   5  328.47   19.50
   4   8   5  298.07   18.40
  -5  -8  -5  554.54   29.20
  -5  -8  -5  603.04   26.90
  -5  -8  -5  595.84   31.70
   5   8   5  586.94   26.60
   5   8   5  592.14   29.20
   5   8   5  606.04   23.80
  -6  -8  -5    4.10    8.90
  -6  -8  -5    2.30    8.70
  -6  -8  -5   10.70   10.30
   6   8   5   -2.00    7.50
   6   8   5   -4.20    8.40
  -7  -8  -5   90.79   15.30
  -7  -8  -5  107.99   17.70
  -7  -8  -5  123.79   16.50
   7   8   5   75.99   14.80
   7   8   5  102.09   16.20
  -8  -8  -5   42.90   12.80
  -8  -8  -5   41.30   12.30
  -8  -8  -5   27.90   12.10
   8   8   5   68.79   15.40
   8   8   5   54.89   13.70
  -9  -8  -5   25.90   11.30
  -9  -8  -5   68.89   14.40
  -9  -8  -5   53.89   15.20
   9   8   5   41.40   13.00
   9   8   5   26.30   11.80
 -10  -8  -5   97.29   18.00
 -10  -8  -5   93.89   19.70
 -10  -8  -5   87.99   18.20
  10   8   5   80.59   16.40
  10   8   5   96.89   20.00
   1  -9  -5  159.28   19.90
   1  -9  -5  163.28   23.30
  -1   9   5  158.68   22.90
  -1   9   5  165.18   21.00
   0  -9  -5   23.00   11.00
   0  -9  -5   18.60    7.80
   0  -9  -5   11.10   12.50
   0   9   5    1.50    9.40
   0   9   5   26.30   12.70
  -1  -9  -5   11.40   10.00
  -1  -9  -5   -6.60    8.30
  -1  -9  -5   13.90   14.00
   1   9   5    8.30    9.30
  -2  -9  -5   29.40   13.90
  -2  -9  -5    1.60    9.10
  -2  -9  -5  -11.70    9.20
   2   9   5   -6.50    8.10
   2   9   5   -9.00    6.10
  -3  -9  -5   -2.30    8.00
  -3  -9  -5    9.90   11.00
  -3  -9  -5   25.30   11.00
   3   9   5   -6.00    7.30
   3   9   5   -4.70    7.00
  -4  -9  -5   32.80   13.20
  -4  -9  -5   60.39   12.20
  -4  -9  -5   79.19   15.00
   4   9   5   44.50   10.50
   4   9   5   77.19   14.30
  -5  -9  -5   35.90   12.60
  -5  -9  -5   28.00   11.90
  -5  -9  -5   16.30   10.20
   5   9   5   17.50    8.10
   5   9   5   28.50   11.70
   5   9   5    9.90    7.90
  -6  -9  -5  210.38   22.20
  -6  -9  -5  218.48   25.30
  -6  -9  -5  185.68   19.50
   6   9   5  202.88   20.50
   6   9   5  198.28   22.80
  -7  -9  -5  259.37   27.80
  -7  -9  -5  285.27   25.70
  -7  -9  -5  248.88   24.00
   7   9   5  237.08   23.50
   7   9   5  284.37   27.30
  -8  -9  -5   88.49   15.80
  -8  -9  -5   88.09   16.90
  -8  -9  -5   68.29   16.30
   8   9   5   58.19   14.50
   8   9   5   69.19   15.20
  -9  -9  -5   15.60   10.60
  -9  -9  -5    1.50    9.40
  -9  -9  -5   -1.20   10.30
   9   9   5    0.10   10.00
   9   9   5  -15.40    7.50
 -10  -9  -5   12.00   12.30
 -10  -9  -5   17.90   13.20
 -10  -9  -5   11.50   11.00
  10   9   5    0.30   12.30
  10   9   5   15.70   11.80
  -1 -10  -5    4.90    9.70
  -1 -10  -5   12.60   13.20
   1  10   5    1.20    9.60
  -2 -10  -5   26.30   11.20
  -2 -10  -5   14.10   11.40
  -2 -10  -5   27.50   14.20
   2  10   5    3.20    9.30
  -3 -10  -5   -7.80   10.10
  -3 -10  -5    8.10   12.40
  -3 -10  -5   -5.00    7.80
   3  10   5   -4.70    8.10
   3  10   5   -7.50    7.80
  -4 -10  -5    6.70   10.60
  -4 -10  -5    9.60   10.20
  -4 -10  -5   -7.10   10.00
   4  10   5    9.50    9.60
   4  10   5   14.30    9.20
  -5 -10  -5    7.00   11.80
  -5 -10  -5   -0.20    9.60
  -5 -10  -5   -2.50    8.50
   5  10   5    8.70    9.50
   5  10   5    6.50    8.80
  -6 -10  -5   -3.90   10.70
  -6 -10  -5    4.80   10.70
  -6 -10  -5   28.70   11.80
   6  10   5   -7.20    7.70
   6  10   5    3.30    9.50
  -7 -10  -5  155.98   19.80
  -7 -10  -5  139.59   22.20
  -7 -10  -5  130.69   19.50
   7  10   5  107.29   17.50
   7  10   5  170.38   22.00
  -8 -10  -5   51.29   14.30
  -8 -10  -5   38.00   14.10
  -8 -10  -5   41.80   14.20
   8  10   5   45.60   13.60
   8  10   5   18.50   12.00
  -9 -10  -5   52.79   16.00
  -9 -10  -5   50.79   15.00
  -9 -10  -5   77.89   17.30
   9  10   5   78.59   17.70
   9  10   5   66.49   15.50
  -3 -11  -5   13.90   12.90
  -3 -11  -5   -3.30   10.80
  -3 -11  -5   20.10   11.20
   3  11   5  -12.10    8.10
  -4 -11  -5   48.00   13.80
  -4 -11  -5   41.90   14.50
  -4 -11  -5   53.79   17.80
   4  11   5   31.80   11.70
   4  11   5   75.19   15.00
  -5 -11  -5   28.80   11.20
  -5 -11  -5   51.69   18.30
  -5 -11  -5   25.60   12.80
   5  11   5   22.30   12.50
  -6 -11  -5   72.09   19.10
  -6 -11  -5   66.09   16.20
  -6 -11  -5   51.99   15.00
   6  11   5   55.29   14.80
  -7 -11  -5   18.80   12.90
  -7 -11  -5    9.50   10.80
  -7 -11  -5   17.50   12.20
   7  11   5   16.60   10.50
   7  11   5    7.40   11.70
   4  11  -6  181.98   22.30
   4  11  -6  141.49   20.30
  -4 -11   6   95.89   18.40
  -4 -11   6  192.78   24.30
  -4 -11   6  154.48   21.10
   3  11  -6    2.40    9.20
   3  11  -6    5.60   10.00
  -3 -11   6    7.60   10.70
  -3 -11   6   19.70   12.70
  -3 -11   6   -1.90   11.80
   2  11  -6  175.68   22.30
   2  11  -6  205.58   22.60
  -2 -11   6  162.48   21.90
  -2 -11   6  210.58   24.20
   6  10  -6   85.69   14.30
   6  10  -6   74.39   16.60
  -6 -10   6   52.39   13.80
  -6 -10   6   64.19   15.70
  -6 -10   6   77.09   17.50
   5  10  -6   24.20   11.30
   5  10  -6   20.50   10.40
  -5 -10   6   16.70    9.90
  -5 -10   6    9.60   10.50
  -5 -10   6    1.00    8.30
  -5 -10   6   24.10   12.80
   4  10  -6    3.00    9.50
   4  10  -6   13.20   10.00
  -4 -10   6   49.90   13.20
  -4 -10   6   20.80   12.40
  -4 -10   6   26.70   12.90
  -4 -10   6   11.20   11.20
   3  10  -6   12.80    9.90
   3  10  -6   17.10   10.50
  -3 -10   6    7.10   11.30
  -3 -10   6   40.60   13.90
  -3 -10   6   23.40   12.10
  -3 -10   6   22.80   10.50
   2  10  -6   48.70   12.60
   2  10  -6   79.39   15.20
  -2 -10   6   83.89   16.50
  -2 -10   6   43.30   14.00
  -2 -10   6   17.10    7.60
  -2 -10   6   58.89   14.00
   1  10  -6   40.70   11.90
   1  10  -6   62.19   13.00
  -1 -10   6   57.39   14.40
  -1 -10   6   58.09   14.20
   0  10  -6   14.30   10.60
   0 -10   6   31.20   12.50
   0 -10   6   24.80   13.90
   7   9  -6   57.89   12.40
   7   9  -6   52.59   15.00
  -7  -9   6   67.59   18.30
  -7  -9   6   48.30   16.40
  -7  -9   6   71.89   15.30
   6   9  -6   67.49   13.00
   6   9  -6   31.20   12.10
  -6  -9   6   60.19   14.90
  -6  -9   6   36.00   12.60
  -6  -9   6   49.60   15.00
  -6  -9   6   68.09   16.80
   5   9  -6   75.09   14.00
   5   9  -6   57.19   13.80
  -5  -9   6   78.39   17.50
  -5  -9   6   98.79   17.80
  -5  -9   6   73.09   14.90
  -5  -9   6   56.59   13.70
   4   9  -6   13.10    9.30
   4   9  -6   20.20   10.50
  -4  -9   6    9.60   10.30
  -4  -9   6   43.80   13.40
  -4  -9   6    6.50    7.90
  -4  -9   6   21.50   11.50
   3   9  -6   55.49   12.80
   3   9  -6   59.09   12.70
  -3  -9   6   83.49   17.00
  -3  -9   6   72.49   15.80
  -3  -9   6   18.70    9.00
  -3  -9   6   83.39   15.20
   2   9  -6   15.00    9.30
   2   9  -6   10.40   10.10
  -2  -9   6   11.30   11.30
  -2  -9   6   20.10   11.10
  -2  -9   6   10.80    8.20
  -2  -9   6   18.20    9.30
   1   9  -6   77.89   14.10
   1   9  -6   65.69   12.60
  -1  -9   6   62.59   13.20
  -1  -9   6   26.20    9.10
  -1  -9   6   70.39   14.90
  -1  -9   6   60.59   14.80
   0   9  -6  172.58   20.40
   0   9  -6  136.29   16.40
   0   9  -6  215.38   21.40
   0   9  -6  178.78   25.30
   0  -9   6  168.78   20.90
   0  -9   6  204.78   22.40
   0  -9   6  176.38   18.90
  -1   9  -6   36.10   12.90
  -1   9  -6   36.90   10.30
   1  -9   6   28.30   12.80
   1  -9   6   63.59   16.20
  -2   9  -6   22.60    9.50
  -2   9  -6    4.70   10.80
   2  -9   6   20.80   14.00
   2  -9   6   10.40   10.90
   8   8  -6   -1.80    8.60
  -8  -8   6   17.20   13.00
  -8  -8   6   17.00   13.00
  -8  -8   6    0.00   11.00
   7   8  -6    7.00    9.10
   7   8  -6    3.40    8.70
  -7  -8   6   -9.70   10.70
  -7  -8   6    3.30    9.90
  -7  -8   6   24.70   11.90
  -7  -8   6   12.90   11.10
   6   8  -6  -15.30    6.80
   6   8  -6   -3.10    8.00
  -6  -8   6   17.90   11.50
  -6  -8   6   -5.40    8.20
  -6  -8   6   -1.00   10.70
  -6  -8   6   -2.10    9.90
   5   8  -6    7.70    8.30
   5   8  -6   15.90    9.50
  -5  -8   6   46.80   12.20
  -5  -8   6   14.90   11.00
  -5  -8   6   38.20   14.20
  -5  -8   6   33.40   11.90
   4   8  -6    7.70    8.00
   4   8  -6    2.80    8.40
  -4  -8   6   -1.10    8.50
  -4  -8   6    2.80    8.00
  -4  -8   6   17.10   10.00
  -4  -8   6   10.40    9.50
   3   8  -6  298.17   20.70
  -3  -8   6  217.38   21.40
  -3  -8   6  210.98   19.70
  -3  -8   6  237.98   23.60
   2   8  -6    8.90    5.80
   2   8  -6    3.90    7.50
  -2  -8   6   -6.90    7.00
  -2  -8   6   10.90    8.70
  -2  -8   6   10.00    9.90
  -2  -8   6   -0.50    9.90
   1   8  -6    1.30    7.90
   1   8  -6   23.30    6.90
  -1  -8   6   17.50    9.20
  -1  -8   6    5.10   10.60
  -1  -8   6    2.20    8.50
  -1  -8   6    4.20    8.30
   0   8  -6  134.89   14.00
   0   8  -6  147.89   17.60
   0   8  -6  138.49   17.50
   0  -8   6  127.79   15.60
   0  -8   6  187.88   20.70
   0  -8   6  130.79   16.20
   0  -8   6  135.99   18.20
  -1   8  -6   23.00    9.90
  -1   8  -6   32.10   11.40
  -1   8  -6   37.00    9.50
   1  -8   6   10.10    9.60
   1  -8   6   42.70   13.50
   1  -8   6   16.50    9.30
   1  -8   6   13.90    9.20
  -2   8  -6   38.70   10.10
  -2   8  -6   34.90   12.80
   2  -8   6   24.40   13.00
   2  -8   6   19.70   11.80
  -3   8  -6   72.99   14.50
  -3   8  -6   45.60   12.40
   3  -8   6   52.69   16.80
   3  -8   6  100.99   17.20
   8   7  -6   -8.70    9.10
   8   7  -6    1.40    8.60
  -8  -7   6   -2.90   10.30
  -8  -7   6   -6.20   10.60
  -8  -7   6   16.70   11.20
   7   7  -6   -0.60    7.20
   7   7  -6   -2.10    7.90
  -7  -7   6   -2.60    8.20
  -7  -7   6    2.80    9.60
  -7  -7   6    9.20   11.20
  -7  -7   6   13.70    9.80
   6   7  -6  157.08   17.40
   6   7  -6  161.78   19.60
  -6  -7   6  132.09   19.50
  -6  -7   6   68.49   16.10
  -6  -7   6  105.19   17.90
  -6  -7   6  123.79   17.20
   5   7  -6    2.20    8.20
  -5  -7   6   15.70   11.00
  -5  -7   6    5.20    9.00
  -5  -7   6   -3.00    9.40
  -5  -7   6    9.50    9.00
   4   7  -6   12.80    8.00
   4   7  -6    8.80    9.20
  -4  -7   6    3.00    8.20
  -4  -7   6    6.30    9.30
  -4  -7   6   -0.10    8.80
  -4  -7   6   18.20   10.60
   3   7  -6  273.37   15.80
   3   7  -6  251.57   18.10
  -3  -7   6  272.87   19.00
  -3  -7   6  310.47   21.20
  -3  -7   6  296.97   22.10
  -3  -7   6  318.47   21.70
   2   7  -6  129.29   12.00
   2   7  -6  122.89   15.00
  -2  -7   6  109.39   16.00
  -2  -7   6  122.79   15.60
  -2  -7   6  112.19   15.00
  -2  -7   6  120.99   16.80
   1   7  -6    1.80    5.50
   1   7  -6   -1.10    7.50
  -1  -7   6    7.80    9.00
  -1  -7   6    1.20    8.00
  -1  -7   6   -1.60    7.20
  -1  -7   6    3.80    9.30
   0   7  -6   84.29   11.30
   0   7  -6   99.19   14.50
   0   7  -6  106.69   14.10
   0  -7   6  114.79   15.00
   0  -7   6   89.49   14.70
   0  -7   6  102.59   13.70
   0  -7   6  127.49   16.90
  -1   7  -6    2.80    7.60
  -1   7  -6    9.60    7.30
  -1   7  -6    5.50    7.80
   1  -7   6    3.80    7.10
   1  -7   6   10.00    9.80
   1  -7   6    8.40   11.20
   1  -7   6    2.40    7.00
  -2   7  -6   21.30    8.80
  -2   7  -6   16.70   10.40
   2  -7   6   18.10   11.20
   2  -7   6   20.70   11.50
   2  -7   6   26.40   12.60
  -3   7  -6    9.00    8.30
  -3   7  -6   10.40    8.50
   3  -7   6   -3.10   13.00
   3  -7   6    5.80    9.50
  -4   7  -6  174.48   21.10
  -4   7  -6  179.08   20.60
   4  -7   6  110.69   19.80
   4  -7   6  122.89   17.90
  -5   7  -6   47.10   13.80
  -5   7  -6   69.69   15.30
   5  -7   6   44.60   13.70
   5  -7   6   46.90   17.60
   8   6  -6   25.20   12.00
   8   6  -6   43.50   14.10
   8   6  -6   -1.10    8.20
   8   6  -6   35.80   12.30
  -8  -6   6   12.20   12.00
  -8  -6   6   16.10   11.60
  -8  -6   6   30.80   12.40
  -8  -6   6   21.50   11.80
   7   6  -6   -2.20    7.60
   7   6  -6    6.70    8.80
   7   6  -6  -12.10    6.60
  -7  -6   6   -4.30    8.30
  -7  -6   6    4.40    9.20
  -7  -6   6   -5.20    9.60
  -7  -6   6   -0.70    9.00
   6   6  -6   38.40   10.10
   6   6  -6   35.00   11.00
  -6  -6   6   34.00   11.00
  -6  -6   6   49.99   14.10
  -6  -6   6   17.00   10.40
  -6  -6   6   51.29   14.50
   5   6  -6   38.10   10.10
   5   6  -6   13.00    8.20
  -5  -6   6   29.90   11.10
  -5  -6   6   16.70   10.90
  -5  -6   6   13.40    9.30
  -5  -6   6   26.60   10.70
  -5  -6   6    7.40    8.10
   4   6  -6   11.50    9.10
   4   6  -6    8.90    7.70
  -4  -6   6   11.20    9.00
  -4  -6   6    9.90    9.90
  -4  -6   6   21.20    9.10
  -4  -6   6   23.00   10.90
  -4  -6   6   10.70    8.00
   3   6  -6  800.52   30.60
   3   6  -6  750.42   26.10
  -3  -6   6  822.32   32.10
  -3  -6   6  799.42   33.30
  -3  -6   6  815.02   29.60
  -3  -6   6  865.91   33.90
  -3  -6   6  788.52   34.30
   2   6  -6    0.30    6.00
   2   6  -6   -7.00    6.30
  -2  -6   6   -3.00    8.10
  -2  -6   6    4.90    7.20
  -2  -6   6   -3.10    7.60
  -2  -6   6   -6.60    6.70
  -2  -6   6    6.40    6.30
   1   6  -6  208.48   15.90
   1   6  -6  204.88   14.10
   1   6  -6  223.68   18.40
  -1  -6   6  207.58   19.30
  -1  -6   6  235.08   11.80
  -1  -6   6  191.88   16.30
  -1  -6   6  185.38   18.80
  -1  -6   6  208.28   16.40
   0   6  -6  132.39   15.90
   0   6  -6  129.39   13.30
   0   6  -6  128.79   15.20
   0  -6   6  116.89   15.70
   0  -6   6  130.69   15.40
   0  -6   6  131.49   14.70
   0  -6   6  147.99   15.80
   0  -6   6  126.09   10.60
  -1   6  -6   14.30    7.70
  -1   6  -6    7.00    7.80
  -1   6  -6    2.80    6.50
   1  -6   6   -1.20    8.40
   1  -6   6    7.30    8.00
   1  -6   6    0.70    6.90
   1  -6   6   -4.00   10.00
   1  -6   6    7.60    7.10
  -2   6  -6   61.69   11.10
  -2   6  -6   36.50    9.70
  -2   6  -6   50.09   11.60
   2  -6   6   44.30   13.50
   2  -6   6   39.60    9.30
   2  -6   6   47.30   10.10
   2  -6   6   37.00   11.80
  -3   6  -6   42.30   10.80
  -3   6  -6   14.00    9.80
   3  -6   6    4.00   13.00
   3  -6   6   26.80   10.50
   3  -6   6   51.39   12.80
  -4   6  -6   63.99   12.40
  -4   6  -6   51.99   13.10
   4  -6   6   38.10   16.80
   4  -6   6   74.59   14.90
   4  -6   6   40.40   12.00
  -5   6  -6   -6.30    7.90
  -5   6  -6  -13.10    6.30
   5  -6   6   -9.80   13.50
   5  -6   6  -16.10    7.70
   5  -6   6  -23.00    9.10
  -6   6  -6  122.19   19.50
  -6   6  -6  157.18   19.40
   6  -6   6   89.89   17.10
   6  -6   6   84.09   18.70
   6  -6   6  136.19   19.20
   8   5  -6   -3.60    7.50
   8   5  -6   -3.50    7.50
   8   5  -6   -4.70    8.00
   8   5  -6   18.00   10.10
   8   5  -6    0.10    8.50
   8   5  -6   -1.80    8.20
  -8  -5   6    2.50    9.60
  -8  -5   6    0.50    9.10
  -8  -5   6  -10.20    9.10
  -8  -5   6    8.30   10.30
  -8  -5   6    1.10    9.30
   7   5  -6  296.17   19.60
   7   5  -6  274.67   18.50
   7   5  -6  278.27   23.80
   7   5  -6  260.97   23.70
   7   5  -6  278.17   20.00
  -7  -5   6  292.67   26.20
  -7  -5   6  245.18   22.70
  -7  -5   6  277.27   19.90
  -7  -5   6  276.47   22.20
  -7  -5   6  230.78   23.30
   6   5  -6   35.40   12.40
   6   5  -6   34.60    9.40
   6   5  -6   20.60    8.50
  -6  -5   6    8.70   10.10
  -6  -5   6   24.30   10.20
  -6  -5   6   31.00   10.60
  -6  -5   6   16.20    9.50
  -6  -5   6   33.80    9.10
   5   5  -6  260.17   20.70
   5   5  -6  236.78   16.40
   5   5  -6  279.37   18.50
  -5  -5   6  251.77   20.40
  -5  -5   6  249.48   21.90
  -5  -5   6  243.98   15.30
  -5  -5   6  266.27   18.90
  -5  -5   6  251.57   20.30
   4   5  -6  172.48   19.20
   4   5  -6  237.68   15.30
   4   5  -6  210.38   16.40
  -4  -5   6  223.88   21.60
  -4  -5   6  197.98   12.20
  -4  -5   6  195.08   19.10
  -4  -5   6  224.38   15.80
  -4  -5   6  222.08   19.90
   3   5  -6  359.66   19.90
   3   5  -6  367.16   17.80
   3   5  -6  387.56   23.40
  -3  -5   6  373.66   22.90
  -3  -5   6  392.76   14.00
  -3  -5   6  358.36   17.90
  -3  -5   6  340.47   20.60
  -3  -5   6  343.27   20.50
   2   5  -6  291.17   19.30
   2   5  -6  283.17   16.50
   2   5  -6  276.67   17.50
  -2  -5   6  285.47   16.20
  -2  -5   6  300.47   19.20
  -2  -5   6  307.77   19.70
  -2  -5   6  313.47   19.50
  -2  -5   6  281.37   10.30
   1   5  -6  290.87   16.30
   1   5  -6  287.87   19.40
   1   5  -6  314.27   17.80
  -1  -5   6  261.77   17.30
  -1  -5   6  273.37   19.10
  -1  -5   6  285.27   15.80
  -1  -5   6  302.27   18.10
  -1  -5   6  291.97    9.60
   0   5  -6  211.48   16.00
   0   5  -6  230.68   15.50
   0   5  -6  190.38   13.70
   0  -5   6  227.48   16.10
   0  -5   6  230.68   16.10
   0  -5   6  225.58   19.00
   0  -5   6  221.68   16.20
   0  -5   6  231.58    9.90
  -1   5  -6   16.00    7.10
  -1   5  -6    6.30    6.60
  -1   5  -6   13.80    7.60
   1  -5   6   12.90    9.10
   1  -5   6    1.20    5.40
   1  -5   6   -3.30    6.20
   1  -5   6    1.70    8.10
  -2   5  -6    6.50    7.30
  -2   5  -6   -0.40    2.50
  -2   5  -6   14.00    8.20
   2  -5   6    2.40    7.60
   2  -5   6    2.80    9.50
   2  -5   6   23.30    7.90
   2  -5   6   -1.80    6.60
  -3   5  -6   72.69   10.40
  -3   5  -6   80.59   12.30
  -3   5  -6   95.09   12.90
   3  -5   6  108.49   12.20
   3  -5   6   65.09   13.50
   3  -5   6   73.29   13.30
   3  -5   6   79.49   11.00
  -4   5  -6  436.26   23.40
  -4   5  -6  407.16   24.20
   4  -5   6  392.66   20.60
   4  -5   6  437.16   25.20
   4  -5   6  434.96   26.80
  -5   5  -6    6.10    7.50
  -5   5  -6   11.40    9.00
   5  -5   6   -2.90    8.90
   5  -5   6   -0.10    8.50
   5  -5   6   -7.70    9.70
  -6   5  -6    4.40    9.10
  -6   5  -6    2.90    8.80
   6  -5   6    3.70    9.50
   6  -5   6    4.00    9.60
   6  -5   6    5.00   12.40
   8   4  -6  -13.60    6.40
   8   4  -6   10.90    8.60
   8   4  -6    5.40    8.80
   8   4  -6   -2.10    7.70
   8   4  -6    3.80    9.70
   8   4  -6   -3.40    8.00
   8   4  -6   -5.90    7.10
  -8  -4   6   -3.50    8.80
  -8  -4   6    6.70   10.30
  -8  -4   6   -7.50    9.90
  -8  -4   6  -16.70    7.80
  -8  -4   6    4.70    9.50
   7   4  -6   38.90   10.30
   7   4  -6   -0.60    8.10
   7   4  -6   42.90   11.30
   7   4  -6   25.20    9.60
   7   4  -6   44.90   11.20
   7   4  -6   35.40   11.80
   7   4  -6   31.50   12.40
  -7  -4   6   41.10   11.70
  -7  -4   6   23.80   10.20
  -7  -4   6    8.70   10.80
  -7  -4   6   18.60   10.40
  -7  -4   6   37.70   11.00
  -7  -4   6   28.70   11.50
   6   4  -6  397.96   26.30
   6   4  -6  437.66   23.00
   6   4  -6  502.75   23.00
   6   4  -6  436.76   22.40
  -6  -4   6  464.45   24.80
  -6  -4   6  448.26   22.80
  -6  -4   6  463.45   25.70
  -6  -4   6  458.75   25.70
  -6  -4   6  423.16   24.70
  -6  -4   6  460.55   26.10
   5   4  -6  109.89   16.80
   5   4  -6   63.59   10.60
   5   4  -6   89.99   12.60
   5   4  -6  103.39   11.10
  -5  -4   6   86.09   12.80
  -5  -4   6  118.09   16.70
  -5  -4   6   79.89   13.50
  -5  -4   6   98.09   11.50
  -5  -4   6  106.19   14.90
   4   4  -6  277.67   20.80
   4   4  -6  330.57   18.70
   4   4  -6  306.47   16.90
  -4  -4   6  274.37   18.60
  -4  -4   6  298.47   18.70
  -4  -4   6  301.67   17.80
  -4  -4   6  297.87   14.30
  -4  -4   6  333.17   21.90
   3   4  -6   46.90    9.40
   3   4  -6   61.39   12.00
   3   4  -6   72.59   10.00
  -3  -4   6   64.69    6.90
  -3  -4   6   75.79   13.30
  -3  -4   6   57.29   10.70
  -3  -4   6   53.49   10.40
  -3  -4   6   73.79    9.50
   2   4  -6   25.70    7.40
   2   4  -6   29.60    9.00
   2   4  -6   20.20    7.20
  -2  -4   6   27.90    8.50
  -2  -4   6   28.20    4.00
  -2  -4   6   42.50    9.40
  -2  -4   6   39.10    9.30
  -2  -4   6   34.50    6.50
   1   4  -6   -6.50    6.30
   1   4  -6   -1.30    1.30
   1   4  -6   14.60    7.50
   1   4  -6    3.60    5.80
  -1  -4   6   -3.20    4.60
  -1  -4   6    7.90    5.90
  -1  -4   6    1.80    1.60
  -1  -4   6   -6.40    4.70
  -1  -4   6   -5.60    5.20
   0   4  -6  378.46   20.40
   0   4  -6  393.56   17.70
   0   4  -6  405.36   18.70
   0  -4   6  385.16    9.40
   0  -4   6  374.06    9.20
   0  -4   6  358.96   18.60
   0  -4   6  436.36   21.30
   0  -4   6  351.86   16.20
   0  -4   6  362.06   19.70
  -1   4  -6    0.70    5.90
  -1   4  -6    1.50    6.30
  -1   4  -6    9.00    6.30
   1  -4   6    0.70    4.00
   1  -4   6    3.30    6.50
   1  -4   6    3.50    7.10
   1  -4   6    5.70    5.90
  -2   4  -6    6.50    6.20
  -2   4  -6   13.50    6.90
  -2   4  -6    8.90    6.60
   2  -4   6   15.40    8.60
   2  -4   6   29.20    7.70
   2  -4   6    9.20    8.00
   2  -4   6   12.40    5.00
  -3   4  -6  463.65   21.70
  -3   4  -6  480.75   22.70
  -3   4  -6  465.55   20.10
   3  -4   6  455.75   20.10
   3  -4   6  515.45   22.90
   3  -4   6  478.35   24.20
   3  -4   6  466.35   18.40
  -4   4  -6    9.90    8.30
  -4   4  -6   10.60    7.20
   4  -4   6    6.80    6.10
   4  -4   6   -5.20    8.00
   4  -4   6   -1.80    6.80
   4  -4   6   -8.60    8.70
  -5   4  -6  470.15   25.30
  -5   4  -6  435.16   23.00
   5  -4   6  486.05   23.50
   5  -4   6  449.26   25.70
   5  -4   6  428.96   25.40
  -6   4  -6   22.10   10.20
  -6   4  -6   39.90   10.90
   6  -4   6   18.80   10.90
   6  -4   6   28.40   10.50
   6  -4   6   33.50   13.50
  -7   4  -6  134.69   19.20
   7  -4   6   49.00   13.20
   7  -4   6   66.69   16.70
   7  -4   6   84.39   16.00
   8   3  -6    8.30    9.30
   8   3  -6   23.10    8.20
   8   3  -6   16.30    9.20
   8   3  -6    7.20    8.40
  -8  -3   6    2.80   11.00
  -8  -3   6   -1.00    9.80
   7   3  -6   10.40    8.20
   7   3  -6   10.50    8.00
   7   3  -6    3.80    7.00
   7   3  -6   15.60    8.50
   7   3  -6    2.10    8.60
   7   3  -6  -10.00    6.70
   7   3  -6    9.60    9.10
  -7  -3   6    2.30    8.80
  -7  -3   6   13.80   10.90
  -7  -3   6   -4.60    7.10
  -7  -3   6    0.70    7.90
   6   3  -6   -7.40    6.50
   6   3  -6   16.80    9.30
   6   3  -6  -11.00    5.70
   6   3  -6    3.10    7.30
   6   3  -6   -0.40    7.70
  -6  -3   6    4.10    8.20
  -6  -3   6    0.10    7.90
  -6  -3   6   -2.80    9.90
  -6  -3   6    1.40    8.10
  -6  -3   6    5.10    9.10
  -6  -3   6    3.20    8.00
   5   3  -6    0.80    8.50
   5   3  -6   10.10    7.60
   5   3  -6    3.40    6.20
   5   3  -6    6.10    7.60
   5   3  -6   13.40    7.10
  -5  -3   6   11.70    8.50
  -5  -3   6   18.90   10.00
  -5  -3   6   14.70    8.20
  -5  -3   6   12.00    9.30
  -5  -3   6   10.70    7.50
  -5  -3   6   13.60    7.20
   4   3  -6  158.08   17.10
   4   3  -6  183.88   14.20
   4   3  -6  180.18   16.10
   4   3  -6  174.18   11.50
  -4  -3   6  190.48   13.80
  -4  -3   6  191.38   18.50
  -4  -3   6  173.88   16.50
  -4  -3   6  166.98   12.00
  -4  -3   6  161.58   15.50
  -4  -3   6  175.28   17.00
   3   3  -6  262.97   11.50
   3   3  -6  287.27   16.90
   3   3  -6  276.77   18.80
   3   3  -6  281.87   16.00
  -3  -3   6  257.57   16.70
  -3  -3   6  279.67   18.60
  -3  -3   6  268.67   14.30
  -3  -3   6  253.27   18.00
  -3  -3   6  287.57   12.30
  -3  -3   6  271.27   16.70
   2   3  -6   -1.40    2.20
   2   3  -6   -3.50    4.90
   2   3  -6    0.20    6.10
   2   3  -6   -9.40    4.30
  -2  -3   6    0.50    5.60
  -2  -3   6    1.10    4.30
  -2  -3   6    3.60    6.00
  -2  -3   6   -0.60    5.70
   1   3  -6  604.14   21.40
   1   3  -6  571.04   24.60
  -1  -3   6  559.14   22.00
  -1  -3   6  577.34   17.50
  -1  -3   6  565.04   22.70
   0   3  -6   23.40    8.50
   0   3  -6   14.40    6.80
   0   3  -6   21.80    8.10
   0  -3   6   11.30    6.50
   0  -3   6   16.80    7.70
   0  -3   6   17.50    5.70
  -1   3  -6    7.50    5.20
  -1   3  -6   11.10    7.00
  -1   3  -6   15.20    7.30
   1  -3   6   12.10    6.40
   1  -3   6   16.90    2.70
   1  -3   6   10.40    3.10
   1  -3   6   11.30    6.10
   1  -3   6    6.40    7.20
  -2   3  -6   16.90    6.70
  -2   3  -6   28.60    7.40
  -2   3  -6   32.90    7.50
   2  -3   6   27.70    8.00
   2  -3   6   24.50    4.50
   2  -3   6   14.70    6.10
   2  -3   6   36.90    9.20
  -3   3  -6  437.86   20.70
  -3   3  -6  429.16   18.80
  -3   3  -6  368.16   17.70
   3  -3   6  435.56   16.30
   3  -3   6  459.15   19.70
   3  -3   6  324.67   20.20
   3  -3   6  455.45   19.40
  -4   3  -6 1294.47   35.60
  -4   3  -6 1294.57   38.90
  -4   3  -6 1258.47   33.20
   4  -3   6 1273.97   37.00
   4  -3   6 1259.27   33.30
   4  -3   6 1261.97   33.70
   4  -3   6 1213.08   38.60
  -5   3  -6   91.19   11.60
  -5   3  -6  105.09   14.70
   5  -3   6  100.29   14.50
   5  -3   6  109.79   12.80
   5  -3   6   75.39    9.90
   5  -3   6  107.29   15.40
  -6   3  -6  265.87   18.80
  -6   3  -6  250.47   21.30
   6  -3   6  244.28   20.40
   6  -3   6  246.48   18.80
   6  -3   6  279.47   21.70
  -7   3  -6   22.80   10.50
   7  -3   6   41.60   12.20
   7  -3   6   65.59   13.40
   7  -3   6   29.00   12.90
  -8   3  -6   39.00   13.90
   8  -3   6   37.30   13.40
   8  -3   6   26.10   12.70
   8  -3   6   26.30   12.40
   8   2  -6   11.90    9.40
   8   2  -6   -4.80    8.60
   8   2  -6   12.10   10.00
  -8  -2   6   -8.10    9.90
  -8  -2   6  -18.40   10.20
   7   2  -6   17.10    9.80
   7   2  -6   22.70   10.10
   7   2  -6   30.50   10.10
   7   2  -6   16.60    8.50
  -7  -2   6   12.60   10.90
  -7  -2   6    0.30   10.90
   6   2  -6   75.29   14.00
   6   2  -6   61.59   11.20
   6   2  -6   74.49   12.70
   6   2  -6   57.89   11.20
   6   2  -6   63.79   11.60
  -6  -2   6   88.29   13.20
  -6  -2   6   81.39   15.50
  -6  -2   6   57.09   13.10
  -6  -2   6   63.89   11.60
   5   2  -6   -0.60    8.20
   5   2  -6   -2.50    5.30
   5   2  -6    4.30    7.60
   5   2  -6    1.00    5.80
  -5  -2   6  -13.90    7.40
  -5  -2   6   -2.90    8.70
  -5  -2   6    4.30    6.80
  -5  -2   6    1.60    7.20
   4   2  -6    5.50    6.80
   4   2  -6    3.80    7.10
   4   2  -6    9.20    5.20
   4   2  -6    1.70    4.70
  -4  -2   6   20.00    6.60
  -4  -2   6    9.20    7.60
  -4  -2   6   -4.30    6.40
  -4  -2   6    3.80    6.00
   3   2  -6  139.29   13.50
   3   2  -6  125.89    8.60
   3   2  -6  100.39   11.40
   3   2  -6  127.79   15.20
  -3  -2   6  118.89   12.20
  -3  -2   6  124.49    9.70
  -3  -2   6  112.69   12.40
  -3  -2   6  116.49   13.20
   2   2  -6   37.50    9.00
   2   2  -6   40.30    4.60
   2   2  -6   40.00    8.40
   2   2  -6   21.00    6.30
  -2  -2   6   28.00    7.80
  -2  -2   6   31.50    8.50
  -2  -2   6   32.70    5.40
  -2  -2   6   39.90    7.90
   1   2  -6  583.74   24.50
   1   2  -6  534.55   10.30
   1   2  -6  567.74   20.80
   1   2  -6  552.44   10.40
  -1  -2   6  517.25   20.60
  -1  -2   6  541.65   14.90
  -1  -2   6  542.15   21.90
   0   2  -6   71.29   11.00
   0   2  -6   80.89    9.40
   0   2  -6   79.99   10.20
   0  -2   6   78.79   10.20
   0  -2   6   80.39   10.20
   0  -2   6   89.99    7.10
  -1   2  -6    1.20    7.70
  -1   2  -6   -2.50    5.20
  -1   2  -6    6.10    6.10
   1  -2   6    0.00    4.80
   1  -2   6   -2.80    5.90
   1  -2   6   -5.70    5.50
  -2   2  -6   93.89   10.80
  -2   2  -6   90.79    9.40
  -2   2  -6  106.39   12.20
   2  -2   6   88.99    6.30
   2  -2   6   90.09    8.90
   2  -2   6   98.09   12.00
   2  -2   6   98.09   11.10
  -3   2  -6    1.60    5.00
  -3   2  -6    4.40    4.50
  -3   2  -6    1.30    5.50
   3  -2   6    0.20    6.50
   3  -2   6    1.30    3.90
   3  -2   6    3.60    5.10
   3  -2   6    3.40    5.20
  -4   2  -6   41.90    7.40
  -4   2  -6   16.20    7.90
  -4   2  -6   36.50    7.60
  -4   2  -6   14.00    5.70
   4  -2   6   15.10    7.60
   4  -2   6   20.90    7.30
   4  -2   6   18.40    6.50
   4  -2   6   27.40    6.60
  -5   2  -6  535.35   25.40
  -5   2  -6  558.14   21.50
  -5   2  -6  554.54   20.40
   5  -2   6  552.84   22.50
   5  -2   6  552.74   21.20
   5  -2   6  550.24   24.20
   5  -2   6  501.95   25.80
  -6   2  -6   -0.50    7.30
  -6   2  -6   -2.60    5.40
   6  -2   6   11.20    9.70
   6  -2   6  -10.50    7.70
   6  -2   6   -0.70    7.30
   6  -2   6    2.70    6.60
  -7   2  -6  149.39   18.80
   7  -2   6  150.88   17.40
   7  -2   6  143.19   17.50
   7  -2   6  127.19   17.00
[truncated: 220,240 more chars]
